# Supplementary material for: Early Response to the Plant Toxin Stenodactylin in Acute Myeloid Leukemia Cells Involves Inflammatory and Apoptotic Signaling
Source: Front Pharmacol. 2020 May 8;11:630. doi: 10.3389/fphar.2020.00630 (PMC7226368; doi:10.3389/fphar.2020.00630)
Supplement: Supplementary Table 1 — Differential Expression Analysis. [file Table_1.xlsx]

## Sheet: 2h
	logFC	AveExpr	t	P.Value	adj.P.Val	B
LOC100128304	-0.318308	7.35088	-4.62778	5.81264e-05	0.78729	-0.0189695
LOC644132	0.27375	9.30995	4.58358	6.60381e-05	0.78729	-0.0878196
RDX	0.331084	8.15557	4.53872	7.51565e-05	0.78729	-0.157797
LOC100133667	-0.247515	7.09817	-4.42774	0.000103419	0.800445	-0.331318
NOLC1	0.312126	9.05235	4.35512	0.000127354	0.800445	-0.445098
CXorf12	-0.248281	7.41941	-4.21591	0.000189478	0.99242	-0.663543
SENP7	-0.278636	7.51952	-4.11169	0.000254689	0.999544	-0.82724
C9orf172	0.254139	7.00013	4.00684	0.000342381	0.999544	-0.991871
LOC728888	-0.289361	9.51408	-3.97576	0.000373635	0.999544	-1.04064
PSRC1	-0.303266	8.85224	-3.96871	0.000381109	0.999544	-1.05171
ELOVL1	0.272581	8.25622	3.92334	0.000432791	0.999544	-1.12285
ZNF518A	-0.227734	8.46429	-3.89453	0.000469096	0.999544	-1.16799
NKTR	-0.296908	8.76212	-3.82289	0.000572757	0.999544	-1.28013
CENPJ	-0.279649	8.60609	-3.77871	0.000647472	0.999544	-1.34917
LOC644328	0.269165	6.85212	3.73039	0.000740032	0.999544	-1.42455
LOC652258	0.275486	6.98213	3.70465	0.000794485	0.999544	-1.46467
LOC642377	0.257076	7.23891	3.68844	0.000830744	0.999544	-1.4899
FAM179B	-0.214097	7.23651	-3.68227	0.000844962	0.999544	-1.4995
KIF1C	0.247616	7.0148	3.67124	0.000870977	0.999544	-1.51666
PFKFB4	-0.258019	8.14544	-3.66544	0.000884964	0.999544	-1.52568
STAG3L3	-0.301846	8.48517	-3.66163	0.000894276	0.999544	-1.5316
CRBN	-0.29023	8.93062	-3.64638	0.000932492	0.999544	-1.5553
CPNE8	-0.346207	9.32364	-3.64133	0.000945489	0.999544	-1.56315
LOC642449	0.263762	7.12571	3.61938	0.00100405	0.999544	-1.59721
OR13G1	-0.232982	6.84328	-3.59113	0.00108463	0.999544	-1.64101
LOC88523	-0.283027	8.6522	-3.57379	0.00113715	0.999544	-1.66786
PILRB	-0.261578	7.87364	-3.56773	0.00115609	0.999544	-1.67724
UNC50	-0.213566	10.9332	-3.5654	0.00116345	0.999544	-1.68085
SNORA61	-0.331303	8.5056	-3.56342	0.00116973	0.999544	-1.68391
KIAA0907	-0.214529	9.41497	-3.55988	0.00118107	0.999544	-1.68939
SCYL1BP1	-0.224056	8.08343	-3.54018	0.00124606	0.999544	-1.71984
LOC387762	-0.202872	6.99792	-3.52015	0.00131567	0.999544	-1.75076
FATE1	-0.211707	7.10653	-3.51631	0.00132943	0.999544	-1.75668
MPND	0.222931	7.35311	3.50327	0.00137722	0.999544	-1.77678
LOC727980	0.251852	8.52943	3.48941	0.00142985	0.999544	-1.79814
LOC650673	0.241212	6.96422	3.47879	0.0014715	0.999544	-1.81449
ZNF829	-0.188428	7.00477	-3.45324	0.00157648	0.999544	-1.85377
LOC644450	0.226824	6.89945	3.4491	0.00159415	0.999544	-1.86013
LOC652456	0.22031	7.01916	3.44325	0.00161949	0.999544	-1.86912
SNORA25	-0.312607	7.67775	-3.41384	0.00175271	0.999544	-1.91423
TIPARP	0.421953	9.64856	3.40937	0.00177382	0.999544	-1.92106
RGS18	-0.243807	9.54766	-3.40567	0.00179154	0.999544	-1.92674
SETBP1	-0.259863	7.06623	-3.40286	0.00180509	0.999544	-1.93104
LOC731050	-0.230376	6.86697	-3.39838	0.00182688	0.999544	-1.93789
LOC126860	0.229417	7.05328	3.39397	0.00184858	0.999544	-1.94463
RHOT1	-0.261017	9.47888	-3.39345	0.00185114	0.999544	-1.94543
MC5R	-0.194948	6.84106	-3.38954	0.00187066	0.999544	-1.95142
CLINT1	0.226836	10.774	3.38936	0.00187153	0.999544	-1.95168
LOC653620	0.305325	7.02673	3.37886	0.00192484	0.999544	-1.96773
ATF7IP2	-0.228708	7.47591	-3.35712	0.00203993	0.999544	-2.00092
DENND2D	-0.249719	7.55962	-3.34942	0.00208226	0.999544	-2.01266
SSBP4	0.23447	8.57873	3.33822	0.00214532	0.999544	-2.02973
PDDC1	0.219457	7.98045	3.33469	0.0021656	0.999544	-2.03511
LOC285544	0.26267	6.97747	3.32537	0.00221994	0.999544	-2.04929
C15orf56	0.204594	6.76749	3.31101	0.00230628	0.999544	-2.07112
WDR43	0.244003	8.8463	3.30874	0.00232026	0.999544	-2.07458
LOC728317	0.219256	6.98042	3.30792	0.00232528	0.999544	-2.07582
ADAT3	0.220659	7.75761	3.30088	0.00236911	0.999544	-2.08651
LRP5L	-0.241305	8.00352	-3.29341	0.00241648	0.999544	-2.09784
PCDH21	0.276896	6.91798	3.29238	0.0024231	0.999544	-2.09941
LOC643154	-0.234385	7.00829	-3.28522	0.00246951	0.999544	-2.11027
LOC730389	0.269661	7.05698	3.28409	0.00247687	0.999544	-2.11198
LOC100129668	-0.202812	7.93825	-3.28344	0.00248115	0.999544	-2.11297
UGT2B10	0.203105	6.77034	3.27439	0.0025413	0.999544	-2.12669
ARHGEF19	-0.201526	7.54273	-3.27233	0.00255514	0.999544	-2.1298
EGR1	-0.287244	8.63448	-3.26943	0.0025748	0.999544	-2.13419
STK11	0.309092	7.56083	3.26533	0.00260286	0.999544	-2.1404
DIAPH1	0.216547	10.1084	3.25506	0.00267437	0.999544	-2.15593
TSC1	-0.200638	8.23397	-3.2514	0.00270029	0.999544	-2.16146
LOC644297	-0.186402	6.92503	-3.2477	0.00272679	0.999544	-2.16705
BANP	-0.277692	11.1191	-3.23301	0.00283434	0.999544	-2.18923
DDX3X	0.240518	10.331	3.2298	0.00285836	0.999544	-2.19407
BAG5	0.189283	9.77554	3.22634	0.00288451	0.999544	-2.19929
KRT18P30	-0.229758	7.10136	-3.22433	0.00289975	0.999544	-2.20231
MAPKSP1	-0.218131	7.32314	-3.2082	0.00302526	0.999544	-2.22662
AGPAT2	0.184283	9.07154	3.19961	0.00309414	0.999544	-2.23953
EXOSC6	0.239005	9.92092	3.19308	0.00314754	0.999544	-2.24935
CYP1B1	0.356924	12.1906	3.19304	0.00314789	0.999544	-2.24941
BET1	-0.236189	8.62551	-3.19157	0.00316007	0.999544	-2.25163
OTUB1	0.186949	7.77131	3.18713	0.00319701	0.999544	-2.2583
C9orf14	-0.177649	6.89368	-3.17939	0.00326235	0.999544	-2.26991
ENDOG	0.223883	9.57129	3.17309	0.00331652	0.999544	-2.27936
ATF2	-0.238899	7.76191	-3.16924	0.00335004	0.999544	-2.28513
KLHL12	-0.196193	9.89033	-3.16668	0.0033725	0.999544	-2.28897
CDC16	-0.183365	11.8136	-3.16285	0.00340637	0.999544	-2.29471
SYVN1	-0.270259	9.5327	-3.15653	0.00346302	0.999544	-2.30418
GCKR	-0.213103	6.98024	-3.1555	0.00347235	0.999544	-2.30572
SOX17	0.207795	6.72254	3.1427	0.00359004	0.999544	-2.32486
RLN1	0.211594	6.75786	3.14251	0.00359187	0.999544	-2.32515
CD300LB	-0.187197	6.93472	-3.14146	0.00360165	0.999544	-2.32671
MIR1203	0.208931	6.83661	3.13769	0.00363715	0.999544	-2.33235
C17orf57	0.230903	6.8294	3.12265	0.00378212	0.999544	-2.3548
STAG3L2	-0.269275	8.67312	-3.11452	0.00386272	0.999544	-2.36691
LOC730078	0.180807	6.94336	3.1131	0.00387703	0.999544	-2.36904
LOC100133263	0.22395	7.13369	3.10596	0.00394944	0.999544	-2.37967
ATP4B	-0.177525	7.02876	-3.09968	0.0040142	0.999544	-2.38901
KIF13A	-0.180682	6.90934	-3.09706	0.00404152	0.999544	-2.39291
LOC646037	0.260709	6.92446	3.09656	0.00404673	0.999544	-2.39365
SNORD18C	-0.207354	6.85629	-3.09621	0.00405044	0.999544	-2.39418
LOC729694	-0.228067	6.83973	-3.09232	0.00409134	0.999544	-2.39995
FLJ40504	-0.225591	7.15652	-3.08232	0.00419854	0.999544	-2.41482
LOC643037	-0.217855	6.95042	-3.07919	0.00423257	0.999544	-2.41946
GOLGA8B	-0.251351	7.69766	-3.07772	0.0042487	0.999544	-2.42165
LOC731159	-0.228043	6.94692	-3.07492	0.00427948	0.999544	-2.4258
STRN3	-0.219338	8.52362	-3.07423	0.00428711	0.999544	-2.42682
SF3A2	0.223123	11.2288	3.07305	0.00430022	0.999544	-2.42857
LOC650515	0.229687	8.54174	3.0713	0.00431962	0.999544	-2.43116
ARHGEF10	-0.166454	8.67509	-3.06148	0.00443029	0.999544	-2.44571
THAP6	-0.191773	7.86737	-3.0595	0.004453	0.999544	-2.44865
MIR760	-0.242539	7.0159	-3.05771	0.00447359	0.999544	-2.4513
PRR15	-0.222947	7.13999	-3.05567	0.00449711	0.999544	-2.45431
SV2A	0.208915	6.9741	3.05173	0.00454294	0.999544	-2.46014
RTTN	-0.211106	8.35442	-3.05068	0.00455521	0.999544	-2.46169
LGALS7	-0.228468	6.9135	-3.04592	0.0046113	0.999544	-2.46873
THAP8	-0.205363	7.0145	-3.04293	0.00464683	0.999544	-2.47315
TGM2	0.168215	7.05033	3.04288	0.00464749	0.999544	-2.47323
TCTN3	0.200817	8.09939	3.0385	0.00470009	0.999544	-2.4797
ARHGAP25	-0.228029	8.02012	-3.03479	0.00474506	0.999544	-2.48517
LOC642176	0.237465	6.91889	3.03365	0.00475892	0.999544	-2.48685
FEN1	0.183523	11.8723	3.02514	0.00486392	0.999544	-2.4994
CCDC74A	-0.185644	6.87337	-3.01783	0.00495595	0.999544	-2.51019
LOC100132377	-0.172527	6.98112	-3.01748	0.0049603	0.999544	-2.51069
B4GALNT3	-0.202573	6.91522	-3.01644	0.00497358	0.999544	-2.51223
LOC100128913	0.188644	6.83874	3.01416	0.00500266	0.999544	-2.51558
LOC650840	0.291823	7.38022	3.01008	0.00505523	0.999544	-2.52159
ZBTB7B	0.183823	7.31539	3.00934	0.00506472	0.999544	-2.52267
SELI	-0.198832	7.83947	-3.00902	0.00506887	0.999544	-2.52314
MIR943	0.182851	6.91768	3.00877	0.00507215	0.999544	-2.52352
LOC648365	0.198558	7.05882	3.00774	0.00508555	0.999544	-2.52503
TMEM156	-0.21355	7.60771	-3.00145	0.00516799	0.999544	-2.53429
GEMIN8	-0.206889	7.56977	-3.00067	0.0051782	0.999544	-2.53542
LOC732162	0.250358	7.06419	2.99701	0.00522682	0.999544	-2.5408
LOC100130707	-0.20213	10.8722	-2.99248	0.00528764	0.999544	-2.54745
KIAA1328	-0.190917	7.05969	-2.98946	0.00532857	0.999544	-2.55189
ADNP2	0.250759	9.41972	2.98928	0.00533099	0.999544	-2.55215
UGCG	-0.227994	7.53761	-2.98844	0.00534249	0.999544	-2.55339
MGC34821	0.16893	7.04129	2.98749	0.00535539	0.999544	-2.55478
CACNA1D	-0.221328	7.0284	-2.98731	0.00535788	0.999544	-2.55505
LOC100132956	-0.20634	6.87192	-2.98558	0.0053816	0.999544	-2.55759
LOC648963	-0.196106	7.13872	-2.98266	0.00542177	0.999544	-2.56187
KRTAP21-1	-0.209791	6.97703	-2.9804	0.00545304	0.999544	-2.56518
VPS37B	0.230005	8.52124	2.97968	0.00546301	0.999544	-2.56623
DAP	0.201919	9.43962	2.97798	0.00548671	0.999544	-2.56872
LOC649971	0.166648	6.92334	2.9755	0.00552158	0.999544	-2.57236
NEUROD2	-0.202565	7.01649	-2.97362	0.00554802	0.999544	-2.57511
C2orf39	-0.179677	6.72739	-2.97298	0.00555707	0.999544	-2.57605
URB1	-0.203505	7.28124	-2.96962	0.00560469	0.999544	-2.58096
CCL3L3	-0.303474	8.05994	-2.96925	0.00560999	0.999544	-2.5815
FAM120B	-0.222685	10.0564	-2.96762	0.00563338	0.999544	-2.5839
LOC727900	0.160345	7.07334	2.96689	0.00564377	0.999544	-2.58496
GPR32	0.206382	6.90816	2.96578	0.0056598	0.999544	-2.58659
GGTLC1	-0.192462	7.23374	-2.96282	0.00570256	0.999544	-2.59092
CRYBA2	-0.208501	7.10706	-2.95476	0.00582044	0.999544	-2.60269
LOC100131727	0.240677	6.99619	2.94938	0.00590038	0.999544	-2.61055
DEFB126	0.200567	6.7447	2.94934	0.00590109	0.999544	-2.61061
PRPF19	0.182071	10.111	2.94868	0.00591097	0.999544	-2.61158
MMGT1	0.174481	10.5338	2.94809	0.00591982	0.999544	-2.61244
LOC727804	-0.204803	6.95673	-2.94531	0.0059616	0.999544	-2.61649
B3GNT1	-0.260467	8.27975	-2.94179	0.00601501	0.999544	-2.62162
MIR298	0.201239	6.93216	2.94088	0.00602893	0.999544	-2.62295
LOC390561	-0.17278	6.98814	-2.93972	0.00604665	0.999544	-2.62464
LOC440419	0.187338	6.84944	2.93352	0.00614229	0.999544	-2.63367
CXorf52	0.241531	6.80245	2.93332	0.00614541	0.999544	-2.63396
C21orf54	0.183185	6.96847	2.93134	0.00617624	0.999544	-2.63684
LOC652436	-0.184015	6.98405	-2.92894	0.00621395	0.999544	-2.64035
ZMYM1	-0.193813	8.31751	-2.92798	0.00622898	0.999544	-2.64174
FBXO30	0.235569	8.72759	2.92202	0.00632352	0.999544	-2.65041
HSPC268	-0.329924	8.31365	-2.9193	0.00636707	0.999544	-2.65436
ZNF627	-0.23727	9.49053	-2.91881	0.00637493	0.999544	-2.65507
GYG2	0.199344	7.10948	2.91804	0.00638741	0.999544	-2.65619
SDHAP2	-0.218967	8.27518	-2.91082	0.00650489	0.999544	-2.66668
LOC653569	-0.170202	6.92903	-2.91076	0.0065058	0.999544	-2.66676
LOC727773	0.180512	7.70966	2.90913	0.00653262	0.999544	-2.66913
LOC646132	0.193207	6.92203	2.90633	0.00657889	0.999544	-2.67319
UBIAD1	0.222432	10.061	2.90604	0.00658368	0.999544	-2.67361
SCD	0.185826	12.4431	2.90315	0.00663187	0.999544	-2.67781
IVL	-0.218256	6.9621	-2.90269	0.00663951	0.999544	-2.67847
MINPP1	-0.230486	7.67045	-2.90109	0.00666633	0.999544	-2.68079
CCRK	-0.226046	9.16878	-2.89877	0.00670542	0.999544	-2.68416
SLC1A5	0.281835	9.47415	2.89821	0.0067148	0.999544	-2.68496
LEF1	-0.175434	7.00867	-2.89718	0.00673226	0.999544	-2.68646
PRKACG	-0.191211	6.83318	-2.89398	0.00678662	0.999544	-2.69109
HMMR	-0.217966	10.3628	-2.89241	0.00681346	0.999544	-2.69336
CGGBP1	-0.178801	10.5268	-2.88993	0.00685613	0.999544	-2.69695
AMIGO1	-0.186407	7.02332	-2.88088	0.00701382	0.999544	-2.71004
ZBTB12	-0.17913	6.79305	-2.87988	0.0070315	0.999544	-2.71149
LOC643738	-0.220729	7.06868	-2.87947	0.00703866	0.999544	-2.71208
CABLES2	-0.154123	7.08518	-2.87812	0.00706255	0.999544	-2.71403
HSPC157	-0.165664	7.6504	-2.87513	0.0071158	0.999544	-2.71835
LOC728347	0.187326	6.86978	2.8745	0.00712707	0.999544	-2.71926
BCL2	0.196784	10.0153	2.872	0.00717188	0.999544	-2.72287
WWC1	0.199131	7.28007	2.86912	0.00722386	0.999544	-2.72703
LOC100131845	-0.184639	6.911	-2.86706	0.00726131	0.999544	-2.73001
GOLGA2	-0.179174	7.56666	-2.86555	0.00728867	0.999544	-2.73217
CTSZ	0.219682	9.6454	2.86338	0.00732856	0.999544	-2.73531
SP3	0.185182	9.11457	2.86335	0.00732906	0.999544	-2.73535
TNNI3K	-0.203029	6.84063	-2.86111	0.0073703	0.999544	-2.73858
LOC100128460	-0.195899	7.01066	-2.85944	0.00740116	0.999544	-2.74099
SFRS14	-0.225813	9.7667	-2.85459	0.00749152	0.999544	-2.74797
MIR1246	0.171846	6.89948	2.84342	0.0077035	0.999544	-2.76404
ARMC8	0.21383	7.91054	2.84323	0.00770718	0.999544	-2.76431
MYCBPAP	0.17553	6.81622	2.83924	0.00778432	0.999544	-2.77004
EIF5B	0.181315	8.70775	2.83742	0.00781971	0.999544	-2.77265
LOC647961	0.205806	6.95302	2.83714	0.0078252	0.999544	-2.77306
CDV3	0.169492	10.5046	2.83029	0.00795984	0.999544	-2.78288
HOXB7	0.161766	6.78318	2.82874	0.00799068	0.999544	-2.7851
LOC646400	0.211031	6.84975	2.82843	0.00799696	0.999544	-2.78556
C10orf110	-0.152224	6.99187	-2.82677	0.00803008	0.999544	-2.78794
CDK3	0.18668	7.01913	2.82581	0.00804923	0.999544	-2.78931
LOC100133002	-0.178925	6.9267	-2.8255	0.00805542	0.999544	-2.78975
LOC390551	0.199108	6.93178	2.82288	0.0081081	0.999544	-2.7935
LOC340900	0.193576	6.90875	2.81771	0.00821312	0.999544	-2.80091
STAR	0.196653	7.64369	2.8161	0.00824609	0.999544	-2.80322
LOC646373	0.19252	6.88036	2.81464	0.008276	0.999544	-2.8053
FRRS1	-0.287892	7.47449	-2.8142	0.00828504	0.999544	-2.80593
FOXN3	0.193796	7.05598	2.81285	0.0083129	0.999544	-2.80786
ZNF419	-0.173062	8.35424	-2.81183	0.008334	0.999544	-2.80932
RNF12	-0.196155	7.06978	-2.80852	0.00840282	0.999544	-2.81405
LOC652710	0.153369	6.89719	2.8051	0.00847451	0.999544	-2.81894
CASP8	-0.18716	7.17131	-2.80432	0.00849083	0.999544	-2.82005
ICA1	-0.28984	7.81441	-2.80426	0.008492	0.999544	-2.82013
C19orf57	-0.211329	7.0923	-2.80297	0.00851933	0.999544	-2.82198
POLQ	-0.202093	9.06789	-2.80221	0.00853529	0.999544	-2.82306
UQCC	-0.156749	10.0753	-2.80186	0.00854284	0.999544	-2.82357
LOC100133609	0.191831	7.62452	2.80024	0.00857709	0.999544	-2.82587
C14orf169	0.167681	9.62394	2.79996	0.00858316	0.999544	-2.82628
LOC100131138	0.16484	6.86527	2.79483	0.00869294	0.999544	-2.83359
LOC641744	0.159186	6.98664	2.79475	0.00869459	0.999544	-2.8337
BOLL	-0.159585	7.0627	-2.79376	0.00871597	0.999544	-2.83511
MIR1305	0.182718	6.85679	2.78536	0.00889915	0.999544	-2.84708
RALY	0.258197	9.85009	2.78473	0.00891307	0.999544	-2.84798
IL18	-0.348336	11.6087	-2.78439	0.00892061	0.999544	-2.84847
SDHC	-0.211364	10.6932	-2.78422	0.00892438	0.999544	-2.84871
LOC645789	0.198569	6.89076	2.78329	0.00894482	0.999544	-2.85003
LOC651704	-0.168404	6.82837	-2.78229	0.0089669	0.999544	-2.85145
LOC286177	-0.179623	6.8761	-2.78056	0.00900541	0.999544	-2.85392
LOC653412	0.183724	6.84992	2.77896	0.00904114	0.999544	-2.8562
AHI1	-0.20456	7.49805	-2.77357	0.00916231	0.999544	-2.86386
LOC389465	0.179565	7.41711	2.77352	0.00916346	0.999544	-2.86393
OR52E5	0.203692	6.97353	2.7731	0.00917283	0.999544	-2.86452
MIR523	0.191001	6.8494	2.76917	0.00926238	0.999544	-2.87011
IRF5	-0.292805	9.40934	-2.76743	0.00930227	0.999544	-2.87258
LOC100129407	0.181706	6.91773	2.76548	0.00934691	0.999544	-2.87534
INPPL1	-0.236357	8.61652	-2.76539	0.00934903	0.999544	-2.87547
LOC196752	-0.20071	7.28011	-2.76461	0.0093672	0.999544	-2.87659
ZNF136	0.174474	7.28145	2.76337	0.00939572	0.999544	-2.87834
LOC158160	-0.226615	8.8336	-2.76165	0.00943566	0.999544	-2.88078
LOC729069	-0.196305	6.86491	-2.75796	0.0095218	0.999544	-2.88601
LOC644517	0.152599	8.56732	2.75725	0.00953853	0.999544	-2.88702
LOC100134027	0.214487	7.03031	2.75422	0.0096099	0.999544	-2.89131
SFRP1	0.201653	6.96663	2.75386	0.00961837	0.999544	-2.89181
HNRPH3	0.198759	9.87368	2.75376	0.00962081	0.999544	-2.89196
LOC651789	-0.179198	6.85055	-2.75226	0.00965649	0.999544	-2.89409
NEIL2	0.173549	8.29096	2.75033	0.00970222	0.999544	-2.89681
LOC645198	-0.197193	6.96263	-2.74877	0.00973966	0.999544	-2.89902
LOC644508	0.253193	6.90937	2.74847	0.00974692	0.999544	-2.89945
ADAM28	-0.159974	6.93418	-2.7478	0.00976284	0.999544	-2.90039
PLA2G12B	0.241614	7.04935	2.74614	0.00980288	0.999544	-2.90275
CPXCR1	0.143096	6.96164	2.74288	0.00988175	0.999544	-2.90736
C19orf44	-0.177499	7.27571	-2.74056	0.00993802	0.999544	-2.91063
KIAA1462	0.171083	7.04493	2.73768	0.0100085	0.999544	-2.91469
HSN2	0.199553	6.95427	2.73509	0.0100724	0.999544	-2.91835
COQ10A	0.202807	7.71264	2.73504	0.0100737	0.999544	-2.91843
STAG2	0.224102	9.17807	2.73497	0.0100755	0.999544	-2.91853
TMEM126B	-0.175732	11.5115	-2.73279	0.0101293	0.999544	-2.9216
GHR	-0.160188	6.73167	-2.73129	0.0101668	0.999544	-2.92372
FMN2	-0.159943	6.83521	-2.73127	0.0101672	0.999544	-2.92374
ATP8A2	-0.190977	6.97217	-2.73012	0.0101959	0.999544	-2.92536
FLJ30430	-0.202886	7.07837	-2.72948	0.0102119	0.999544	-2.92627
FAM86A	0.202775	8.57746	2.72868	0.0102319	0.999544	-2.92739
CAMK2N1	0.222381	6.9562	2.72866	0.0102325	0.999544	-2.92743
RABIF	-0.176364	7.39243	-2.72704	0.0102732	0.999544	-2.92971
NPM1	-0.165188	6.94136	-2.72435	0.0103412	0.999544	-2.93351
EIF2C4	-0.178298	7.22503	-2.72303	0.0103746	0.999544	-2.93536
ANKRD53	-0.187371	7.01657	-2.72236	0.0103916	0.999544	-2.93631
RPL39L	0.194469	10.3477	2.72177	0.0104068	0.999544	-2.93714
KIAA1712	-0.17479	9.21656	-2.72076	0.0104325	0.999544	-2.93856
LOC645408	0.186098	6.95305	2.71854	0.0104894	0.999544	-2.94169
KRT6C	0.182389	6.83971	2.71847	0.010491	0.999544	-2.94178
OR13J1	-0.162105	6.78417	-2.71683	0.0105331	0.999544	-2.94409
OR1Q1	0.158811	6.87503	2.71601	0.0105545	0.999544	-2.94525
C7orf26	0.224066	9.30055	2.71377	0.0106122	0.999544	-2.94839
LOC100131591	-0.221006	7.01579	-2.71299	0.0106326	0.999544	-2.9495
C2orf54	0.170204	7.00241	2.70927	0.0107297	0.999544	-2.95472
MIR155HG	-0.23431	7.59902	-2.7087	0.0107446	0.999544	-2.95552
AHSA2	-0.196522	7.8542	-2.70716	0.0107852	0.999544	-2.95769
LOC645385	0.246905	13.7607	2.70561	0.0108261	0.999544	-2.95987
CTNS	-0.220218	9.18108	-2.70535	0.0108328	0.999544	-2.96022
LOC646026	-0.195261	7.05665	-2.70533	0.0108335	0.999544	-2.96026
TMEM79	-0.214134	7.98145	-2.70512	0.0108389	0.999544	-2.96055
SPANXN5	0.17562	6.93926	2.70326	0.0108884	0.999544	-2.96317
CXorf26	0.175207	10.5005	2.70175	0.0109286	0.999544	-2.96529
H3F3B	0.16457	10.0377	2.7015	0.0109351	0.999544	-2.96563
LOC100130886	0.213989	9.36691	2.70101	0.0109483	0.999544	-2.96632
HFE	0.188407	7.04864	2.70054	0.0109607	0.999544	-2.96697
LAD1	0.144596	7.10153	2.69978	0.0109811	0.999544	-2.96805
RNF40	0.193576	8.56315	2.6992	0.0109967	0.999544	-2.96886
SNORD52	-0.188007	7.48567	-2.69863	0.011012	0.999544	-2.96966
LOC644302	0.162544	7.01898	2.69847	0.0110162	0.999544	-2.96988
KRT6B	0.168147	7.10102	2.69535	0.0111003	0.999544	-2.97425
MAP3K5	0.240681	8.26564	2.68986	0.0112499	0.999544	-2.98195
LOC729950	0.163073	7.23976	2.68887	0.0112769	0.999544	-2.98333
GAGE12G	0.172251	6.95459	2.68869	0.0112818	0.999544	-2.98358
C1orf187	0.202468	7.01943	2.68641	0.0113447	0.999544	-2.98678
LOC650028	0.186993	7.00601	2.68628	0.0113482	0.999544	-2.98696
SLC30A1	0.184818	7.78308	2.68579	0.0113619	0.999544	-2.98765
FAM180A	-0.162175	6.95261	-2.6833	0.0114309	0.999544	-2.99113
LOC389124	-0.178143	7.10317	-2.68287	0.0114429	0.999544	-2.99173
LOC647998	-0.170789	6.84674	-2.68219	0.0114617	0.999544	-2.99268
NOMO2	0.178646	10.0144	2.68137	0.0114847	0.999544	-2.99383
LOC643363	0.16506	6.95069	2.67936	0.0115409	0.999544	-2.99664
ANKRA2	-0.266714	8.17787	-2.67923	0.0115446	0.999544	-2.99682
LOC644423	-0.154099	7.6802	-2.67788	0.0115824	0.999544	-2.9987
KLHL33	0.229123	7.28904	2.67613	0.0116318	0.999544	-3.00115
LGSN	0.181455	6.86122	2.67589	0.0116387	0.999544	-3.00149
ZBED5	-0.202225	9.64405	-2.67424	0.0116854	0.999544	-3.0038
MSH6	0.168831	10.9909	2.67394	0.0116939	0.999544	-3.00421
CLDN15	-0.185172	8.17893	-2.67339	0.0117095	0.999544	-3.00498
PRG1	-0.18431	6.91205	-2.66846	0.0118503	0.999544	-3.01185
SLC26A8	-0.228214	7.61102	-2.66533	0.0119407	0.999544	-3.01622
ZFP30	-0.220253	6.95453	-2.66456	0.0119631	0.999544	-3.0173
CD55	-0.265352	7.81952	-2.66293	0.0120105	0.999544	-3.01957
C1orf215	0.216118	7.04933	2.66239	0.0120261	0.999544	-3.02032
LOC653392	-0.156832	6.97938	-2.66157	0.01205	0.999544	-3.02146
UOX	0.184814	6.88459	2.66135	0.0120564	0.999544	-3.02177
PWWP2B	0.18101	8.16606	2.66117	0.0120617	0.999544	-3.02202
ARMC6	0.183713	8.41969	2.65961	0.0121073	0.999544	-3.02419
LOC100129509	0.168191	6.97457	2.65832	0.0121454	0.999544	-3.02599
LOC388795	-0.164087	6.93242	-2.65803	0.0121539	0.999544	-3.02639
LOC90342	0.216704	7.2044	2.65787	0.0121583	0.999544	-3.02661
GUCY1A2	0.154926	6.93083	2.65519	0.0122375	0.999544	-3.03034
GLI1	0.182366	6.92204	2.65369	0.0122822	0.999544	-3.03244
LOC732455	0.153128	7.0479	2.65341	0.0122903	0.999544	-3.03281
ISCA2	-0.168264	8.06619	-2.65111	0.0123589	0.999544	-3.03601
ZFP161	-0.162593	8.53955	-2.64991	0.0123949	0.999544	-3.03768
GRWD1	0.193723	10.6077	2.64984	0.012397	0.999544	-3.03778
SUMO4	0.165453	6.95806	2.6495	0.0124074	0.999544	-3.03826
WDR64	-0.201703	6.95247	-2.64878	0.0124289	0.999544	-3.03926
LPIN2	-0.169055	7.68037	-2.64667	0.0124925	0.999544	-3.04219
GINS1	-0.209963	7.13706	-2.64586	0.0125169	0.999544	-3.04331
OR10A3	0.161162	6.89787	2.64181	0.0126399	0.999544	-3.04893
STK36	-0.160451	8.14148	-2.64038	0.0126835	0.999544	-3.05091
LOC644241	-0.208277	6.97474	-2.63856	0.0127395	0.999544	-3.05345
LOC729952	0.183749	7.73148	2.63769	0.0127662	0.999544	-3.05465
LOC392275	0.179303	7.01333	2.63655	0.0128014	0.999544	-3.05623
MIR203	-0.156538	7.04508	-2.63652	0.0128022	0.999544	-3.05627
CCDC105	0.155879	6.85592	2.63496	0.0128505	0.999544	-3.05843
CIRBP	0.186316	11.506	2.63345	0.0128974	0.999544	-3.06052
C6orf10	0.1939	6.82028	2.63217	0.0129373	0.999544	-3.0623
LOC645279	-0.159383	6.86946	-2.62959	0.0130179	0.999544	-3.06587
TTK	-0.208729	10.3057	-2.62954	0.0130194	0.999544	-3.06594
LOC728247	0.156513	6.85894	2.62953	0.0130199	0.999544	-3.06596
AASDH	-0.18871	7.92512	-2.62825	0.0130601	0.999544	-3.06773
C6orf168	0.15826	6.86898	2.6278	0.0130743	0.999544	-3.06835
MICB	-0.185378	8.6147	-2.62769	0.0130776	0.999544	-3.0685
CCDC86	0.287	9.98423	2.6198	0.0133284	0.999544	-3.07941
ELK3	0.185545	6.99004	2.61771	0.0133955	0.999544	-3.0823
LOC643191	-0.217553	6.89957	-2.61549	0.0134673	0.999544	-3.08537
LOC643918	-0.18198	7.21318	-2.61332	0.0135376	0.999544	-3.08836
CRHR2	-0.195066	7.02782	-2.61313	0.0135437	0.999544	-3.08862
GEMIN5	0.197416	7.96865	2.60992	0.0136485	0.999544	-3.09305
SIGLEC9	-0.192468	7.1801	-2.60905	0.0136773	0.999544	-3.09426
TMEM187	-0.203152	7.42823	-2.6059	0.0137808	0.999544	-3.09859
COG8	0.205078	7.52609	2.6051	0.0138074	0.999544	-3.0997
CCDC11	0.179727	6.83475	2.60488	0.0138147	0.999544	-3.1
FBXL16	-0.153539	6.93902	-2.60389	0.0138476	0.999544	-3.10137
ZNF491	0.213857	7.07155	2.60196	0.0139117	0.999544	-3.10402
EIF4A2	-0.216908	12.4805	-2.6	0.0139772	0.999544	-3.10672
C5orf48	-0.186565	6.69088	-2.5989	0.014014	0.999544	-3.10823
ASH1L	0.172737	7.10389	2.59692	0.0140808	0.999544	-3.11096
ERCC-00096	0.175002	6.83492	2.59507	0.0141434	0.999544	-3.11351
FLJ21865	0.238287	7.28388	2.59437	0.0141669	0.999544	-3.11446
HIC1	-0.172536	7.04972	-2.59401	0.0141792	0.999544	-3.11496
LOC391578	-0.193133	9.35804	-2.59343	0.0141989	0.999544	-3.11576
LOC641365	-0.165842	7.11384	-2.59177	0.0142554	0.999544	-3.11804
LOC643853	0.167188	6.92175	2.59167	0.0142587	0.999544	-3.11817
LOC644732	-0.155989	6.89609	-2.59042	0.0143015	0.999544	-3.11989
RBM5	-0.152061	9.82542	-2.58831	0.014374	0.999544	-3.1228
LOC653576	0.176862	6.88602	2.58798	0.0143852	0.999544	-3.12324
TNNC1	0.180019	6.91875	2.58732	0.0144081	0.999544	-3.12416
FAM174A	0.170168	7.89245	2.58598	0.0144544	0.999544	-3.126
HSCB	-0.191871	8.34847	-2.58517	0.0144823	0.999544	-3.12711
NT5C1A	-0.168298	6.92128	-2.58296	0.0145591	0.999544	-3.13014
MCM5	0.160517	10.4222	2.58269	0.0145684	0.999544	-3.13051
ATP1A1	0.150492	11.7236	2.5823	0.0145818	0.999544	-3.13104
C8orf45	-0.38573	9.23243	-2.57838	0.0147191	0.999544	-3.13642
C1orf69	0.183802	7.45132	2.57732	0.0147562	0.999544	-3.13786
SPSB3	-0.247611	9.39353	-2.57387	0.0148783	0.999544	-3.1426
JARID2	0.18123	10.2715	2.57374	0.0148828	0.999544	-3.14277
MIR184	0.154935	6.90534	2.5733	0.0148984	0.999544	-3.14337
LOC653817	-0.181969	6.91704	-2.57263	0.0149224	0.999544	-3.14429
VHL	-0.147627	9.73834	-2.57184	0.0149503	0.999544	-3.14537
LOC727811	-0.199734	6.99381	-2.57148	0.0149631	0.999544	-3.14586
NTF3	0.181694	6.8904	2.57104	0.0149788	0.999544	-3.14646
SFRS2	0.155907	12.9845	2.56802	0.015087	0.999544	-3.15059
FABP12	0.203668	6.87255	2.56599	0.0151604	0.999544	-3.15338
TREML2	-0.227345	7.13209	-2.56559	0.0151749	0.999544	-3.15393
C21orf71	0.154229	6.94996	2.56521	0.0151885	0.999544	-3.15444
LOC727825	-0.15825	7.33688	-2.56338	0.0152549	0.999544	-3.15694
ABCE1	0.189955	10.4009	2.56275	0.0152776	0.999544	-3.1578
FGFR1	0.159206	6.96607	2.56255	0.0152851	0.999544	-3.15808
LOC100134053	-0.163577	7.25154	-2.56147	0.0153242	0.999544	-3.15954
LOC440491	0.194436	6.99277	2.55777	0.0154596	0.999544	-3.16459
LOC100133079	0.223068	6.90256	2.55691	0.0154914	0.999544	-3.16577
LOC284395	0.184233	6.92664	2.55673	0.015498	0.999544	-3.16602
LIME1	-0.2154	7.68406	-2.55576	0.0155338	0.999544	-3.16734
MIRLET7E	-0.174752	6.83131	-2.55363	0.0156125	0.999544	-3.17024
LOC647841	-0.174078	6.95818	-2.55296	0.0156373	0.999544	-3.17115
DNAH14	-0.150259	7.05476	-2.55159	0.0156883	0.999544	-3.17302
C1orf170	0.166939	7.15196	2.55112	0.0157062	0.999544	-3.17367
MID1	-0.145933	7.03516	-2.55052	0.0157285	0.999544	-3.17449
IFT80	-0.17478	7.2057	-2.54967	0.0157603	0.999544	-3.17565
FLJ32955	-0.179439	7.13626	-2.54906	0.0157832	0.999544	-3.17648
MIR33A	-0.203918	6.89146	-2.54851	0.0158037	0.999544	-3.17722
REEP4	0.209537	7.91592	2.54743	0.0158443	0.999544	-3.1787
MPP6	0.191058	8.33844	2.5469	0.0158643	0.999544	-3.17942
PDE12	0.182864	8.75655	2.5468	0.0158681	0.999544	-3.17956
LOC402571	-0.173304	7.06853	-2.54521	0.015928	0.999544	-3.18172
CHRNA6	0.205083	6.98597	2.54474	0.0159456	0.999544	-3.18235
CCDC41	-0.175067	8.19183	-2.54446	0.0159561	0.999544	-3.18273
S100A2	-0.197336	6.85752	-2.54357	0.01599	0.999544	-3.18395
LOC654346	0.21	7.70319	2.54297	0.0160128	0.999544	-3.18477
C1orf19	-0.157417	10.2561	-2.54157	0.0160658	0.999544	-3.18666
LOC652685	-0.187414	7.965	-2.54023	0.016117	0.999544	-3.18849
C20orf72	-0.15474	10.1081	-2.54004	0.0161243	0.999544	-3.18875
C4orf46	0.158149	8.59957	2.53842	0.0161864	0.999544	-3.19095
C9orf129	0.156789	6.86984	2.53838	0.0161878	0.999544	-3.191
CABLES1	0.164472	8.0535	2.5381	0.0161985	0.999544	-3.19138
TAF1C	-0.170973	9.48153	-2.53763	0.0162168	0.999544	-3.19203
THY1	-0.169341	6.76099	-2.53724	0.0162315	0.999544	-3.19255
LOC643594	-0.203876	7.00027	-2.53587	0.0162846	0.999544	-3.19442
LOC647199	0.160206	7.04977	2.53552	0.016298	0.999544	-3.19489
RFX3	0.159849	7.14099	2.53546	0.0163001	0.999544	-3.19497
LOC651576	0.156571	7.1841	2.53485	0.0163239	0.999544	-3.19581
LOC642720	0.145918	6.83282	2.53443	0.0163398	0.999544	-3.19636
DCK	-0.173067	9.88453	-2.53025	0.0165026	0.999544	-3.20205
KIAA1239	0.156206	6.96299	2.52927	0.0165406	0.999544	-3.20337
LOC730344	0.160593	6.95153	2.52887	0.0165564	0.999544	-3.20391
EMILIN3	0.14568	6.76418	2.5274	0.0166142	0.999544	-3.20591
P2RY5	-0.185256	7.19549	-2.52715	0.016624	0.999544	-3.20625
LOC149620	-0.190991	7.00789	-2.52637	0.0166547	0.999544	-3.20731
LINS1	-0.159616	8.00309	-2.52487	0.0167138	0.999544	-3.20934
MYOT	0.168896	6.81302	2.52442	0.0167316	0.999544	-3.20995
CLIC5	0.164033	6.81341	2.52389	0.0167525	0.999544	-3.21067
FBXO31	0.150877	8.5382	2.52364	0.0167624	0.999544	-3.21101
LOC100128326	-0.181049	7.78021	-2.52352	0.016767	0.999544	-3.21116
HRAS	0.182244	8.63333	2.52345	0.0167698	0.999544	-3.21126
LOC100128507	-0.181438	7.05286	-2.52339	0.0167724	0.999544	-3.21135
WDR21A	0.183765	8.46679	2.52322	0.0167791	0.999544	-3.21158
GLRB	0.169546	6.86644	2.52315	0.0167819	0.999544	-3.21167
LOC650429	-0.164754	6.89456	-2.52214	0.016822	0.999544	-3.21304
METAP2	0.166891	11.7745	2.52118	0.0168601	0.999544	-3.21434
MOBP	0.154485	6.99289	2.5211	0.0168631	0.999544	-3.21444
MRPL22	-0.185327	11.5883	-2.52062	0.0168824	0.999544	-3.2151
C7orf65	-0.168448	7.03551	-2.52003	0.0169058	0.999544	-3.21589
LOC100128131	0.154167	7.04036	2.51868	0.0169599	0.999544	-3.21772
DUX4C	0.17034	6.98294	2.51828	0.0169757	0.999544	-3.21826
LOC731827	0.184676	6.98777	2.51565	0.0170815	0.999544	-3.22182
HES3	-0.158938	7.02061	-2.51495	0.0171099	0.999544	-3.22277
TMEM135	0.209228	7.55583	2.51466	0.0171217	0.999544	-3.22317
LOC647343	0.196036	6.92019	2.51431	0.0171357	0.999544	-3.22364
WHDC1L2	-0.208549	8.22554	-2.51273	0.0171996	0.999544	-3.22577
DHRS4	0.176545	11.2731	2.51271	0.0172002	0.999544	-3.22579
LOC100128088	-0.188998	6.85906	-2.51265	0.0172029	0.999544	-3.22588
LOC200030	-0.169013	8.32976	-2.51258	0.0172057	0.999544	-3.22597
MAPK1	-0.146842	9.53562	-2.51191	0.017233	0.999544	-3.22688
CCDC125	-0.232749	8.37301	-2.51185	0.0172354	0.999544	-3.22696
CCDC77	-0.168671	9.78844	-2.51184	0.0172355	0.999544	-3.22697
GABPB2	-0.372969	11.9919	-2.51075	0.0172801	0.999544	-3.22845
INSIG2	-0.188074	8.04415	-2.50909	0.0173479	0.999544	-3.23069
LOC653650	-0.163533	7.14374	-2.50833	0.017379	0.999544	-3.23172
SRRM1	0.172541	11.5033	2.508	0.0173925	0.999544	-3.23216
LOC100130815	-0.159001	7.02748	-2.5037	0.0175695	0.999544	-3.23797
KIAA1024	-0.156348	6.87394	-2.50354	0.0175759	0.999544	-3.23817
LOC643132	0.151617	6.89876	2.50313	0.017593	0.999544	-3.23873
GPR1	-0.324113	7.91753	-2.50254	0.0176175	0.999544	-3.23953
LPHN1	0.161922	7.24266	2.50145	0.0176624	0.999544	-3.24099
DDX24	0.228844	10.0382	2.50063	0.0176969	0.999544	-3.24211
ECSIT	0.169461	7.90396	2.50052	0.0177013	0.999544	-3.24225
LOC645413	-0.162446	7.01248	-2.49988	0.0177281	0.999544	-3.24312
ZFP90	-0.156773	8.16257	-2.49975	0.0177332	0.999544	-3.24328
RASSF7	-0.143365	9.66622	-2.49936	0.0177494	0.999544	-3.24381
THBS4	-0.219578	8.08363	-2.49865	0.0177792	0.999544	-3.24477
WDR31	0.142776	6.95337	2.49657	0.0178665	0.999544	-3.24757
C5orf22	0.183412	7.54454	2.49593	0.0178934	0.999544	-3.24843
ROR1	-0.1629	7.12024	-2.49412	0.0179697	0.999544	-3.25087
TNFAIP8	-0.18767	10.2052	-2.49253	0.0180368	0.999544	-3.25301
KIAA1543	-0.149838	6.83489	-2.49234	0.0180446	0.999544	-3.25326
TMC7	-0.141086	6.84554	-2.49122	0.0180923	0.999544	-3.25477
CABP2	-0.142163	7.04543	-2.49106	0.0180992	0.999544	-3.25499
LOC100128505	-0.408301	11.5717	-2.49054	0.0181213	0.999544	-3.25569
GOLGA3	0.176069	9.23568	2.48758	0.0182478	0.999544	-3.25967
KIF5C	-0.154985	6.99214	-2.48736	0.0182571	0.999544	-3.25996
FLJ25363	-0.290407	7.94282	-2.48407	0.0183982	0.999544	-3.26438
LOC100130633	-0.181827	8.44395	-2.4836	0.0184188	0.999544	-3.26502
ZXDB	-0.144819	6.89209	-2.48337	0.0184285	0.999544	-3.26532
TMEM14D	-0.174033	11.8043	-2.48322	0.0184351	0.999544	-3.26552
C10orf2	0.160662	9.16944	2.48246	0.0184678	0.999544	-3.26654
HIST1H2AM	-0.156994	7.31723	-2.48205	0.0184858	0.999544	-3.2671
ACTR8	0.152753	7.73772	2.48121	0.0185221	0.999544	-3.26822
MECR	0.162967	7.26518	2.48107	0.0185284	0.999544	-3.26841
MRFAP1L1	-0.153463	10.7449	-2.48031	0.018561	0.999544	-3.26942
LTBP3	0.158117	7.32155	2.48023	0.0185649	0.999544	-3.26954
PPP1R3B	-0.170313	7.08358	-2.47823	0.0186518	0.999544	-3.27222
FAM131A	-0.180312	7.35694	-2.47605	0.0187472	0.999544	-3.27514
C1orf130	0.178146	7.25715	2.47498	0.0187945	0.999544	-3.27658
ABCA3	0.178272	6.94706	2.47464	0.0188093	0.999544	-3.27703
OGT	-0.18522	9.67513	-2.47329	0.0188686	0.999544	-3.27884
RXFP2	0.181239	6.92226	2.47214	0.0189195	0.999544	-3.28038
C3orf38	-0.173168	8.90432	-2.4721	0.0189215	0.999544	-3.28044
N4BP2	-0.306907	8.06529	-2.47187	0.0189317	0.999544	-3.28075
LOC643423	-0.173216	6.97524	-2.47032	0.0190003	0.999544	-3.28282
LOC400499	0.177991	6.97653	2.46819	0.0190951	0.999544	-3.28567
ZDHHC16	-0.147219	10.8003	-2.46785	0.0191106	0.999544	-3.28613
DPF2	-0.150379	9.80157	-2.46732	0.019134	0.999544	-3.28683
SH3BP2	0.153044	6.87036	2.46649	0.0191712	0.999544	-3.28795
POR	0.173727	7.9741	2.46597	0.0191946	0.999544	-3.28864
WDR13	0.179009	8.7696	2.46402	0.0192823	0.999544	-3.29125
KIAA1202	0.186802	6.97811	2.46371	0.0192961	0.999544	-3.29166
ADAM12	0.151056	7.10337	2.46346	0.0193075	0.999544	-3.292
DCAF16	0.191504	7.70736	2.46305	0.0193258	0.999544	-3.29254
GPR101	-0.184379	7.01654	-2.4629	0.0193327	0.999544	-3.29275
LZTFL1	0.223293	7.84288	2.4627	0.0193414	0.999544	-3.29301
SLC25A42	-0.185862	7.87652	-2.46254	0.0193486	0.999544	-3.29322
KLC1	0.144988	7.95784	2.46186	0.0193795	0.999544	-3.29413
SLC16A11	-0.163408	6.88723	-2.46159	0.0193919	0.999544	-3.2945
DCP1B	-0.15979	7.2874	-2.46144	0.0193988	0.999544	-3.2947
GPR89B	0.172886	8.41352	2.46094	0.0194213	0.999544	-3.29536
AS3MT	0.157259	6.98367	2.46029	0.0194506	0.999544	-3.29623
LOC649659	0.150282	6.90349	2.45919	0.0195008	0.999544	-3.2977
KLHL4	0.139032	6.84304	2.45887	0.0195152	0.999544	-3.29813
ERCC-00054	-0.162836	6.77947	-2.45805	0.0195527	0.999544	-3.29923
SNORD32A	-0.175068	7.48742	-2.45665	0.0196167	0.999544	-3.3011
C12orf39	0.160401	6.79628	2.45598	0.0196474	0.999544	-3.30199
C17orf98	0.189257	7.36391	2.45588	0.0196521	0.999544	-3.30213
RAB2B	-0.161447	9.40119	-2.45505	0.0196901	0.999544	-3.30323
VNN2	-0.217377	7.19807	-2.45485	0.0196992	0.999544	-3.3035
LOC643258	-0.171368	6.91992	-2.45416	0.0197309	0.999544	-3.30442
CCDC130	-0.166507	9.7451	-2.45348	0.0197622	0.999544	-3.30532
LOC649940	0.189181	6.93233	2.45304	0.0197825	0.999544	-3.30591
TRPC7	-0.148387	6.72455	-2.45281	0.0197931	0.999544	-3.30622
INSM1	0.165548	6.99631	2.45265	0.0198002	0.999544	-3.30643
DMXL1	0.176483	7.01107	2.45144	0.0198564	0.999544	-3.30805
LOC644256	0.209448	7.18823	2.44868	0.0199844	0.999544	-3.31172
LOC283028	-0.135591	6.97218	-2.44745	0.0200416	0.999544	-3.31336
NR2E1	0.152119	7.15493	2.44644	0.0200887	0.999544	-3.3147
GADD45G	-0.182931	6.85996	-2.44634	0.0200935	0.999544	-3.31484
USP14	0.22119	8.0464	2.44424	0.0201917	0.999544	-3.31763
ELP4	0.157451	8.66041	2.44377	0.020214	0.999544	-3.31826
FLJ45121	0.172224	6.73705	2.44364	0.0202202	0.999544	-3.31844
OR7E91P	0.150043	6.84492	2.44323	0.0202395	0.999544	-3.31898
TRERF1	0.179914	7.86826	2.44269	0.0202649	0.999544	-3.3197
LOC644591	-0.17114	7.24843	-2.44149	0.0203213	0.999544	-3.32129
MED24	0.197763	8.65388	2.43969	0.0204066	0.999544	-3.32369
LOC650494	0.16336	6.93318	2.43856	0.0204604	0.999544	-3.32519
ZNF600	-0.15068	6.98372	-2.43775	0.0204987	0.999544	-3.32626
LCE5A	0.150003	6.94859	2.43733	0.0205187	0.999544	-3.32682
GATA4	-0.160394	6.84304	-2.43668	0.0205499	0.999544	-3.32769
LNX1	0.164833	6.80468	2.43622	0.0205718	0.999544	-3.3283
OR7D4	0.168438	6.80312	2.43487	0.0206364	0.999544	-3.33009
YAF2	-0.159332	7.73076	-2.43474	0.0206426	0.999544	-3.33026
SNORD59B	-0.14463	7.00956	-2.43447	0.0206554	0.999544	-3.33062
LOC651655	0.169551	6.95306	2.43365	0.0206946	0.999544	-3.3317
AVPR2	-0.206777	7.46267	-2.43325	0.0207141	0.999544	-3.33224
KIAA1310	-0.153733	10.4876	-2.43301	0.0207254	0.999544	-3.33255
IER2	-0.179452	8.15529	-2.4325	0.0207503	0.999544	-3.33324
MUTED	-0.143647	9.93937	-2.43131	0.0208077	0.999544	-3.33482
KPNA3	0.203862	10.0846	2.4296	0.0208902	0.999544	-3.33708
LOC100131510	-0.18544	7.32829	-2.42936	0.0209019	0.999544	-3.3374
LOC100128750	0.177175	7.04946	2.42902	0.0209183	0.999544	-3.33785
KCNN2	-0.167221	10.1238	-2.42864	0.0209367	0.999544	-3.33836
SUPT16H	0.174301	11.1136	2.42826	0.0209553	0.999544	-3.33886
LOC100132724	0.172243	7.11189	2.4278	0.0209778	0.999544	-3.33948
SMU1	0.171917	9.26671	2.42719	0.0210075	0.999544	-3.34029
FGFRL1	0.162201	7.96812	2.42714	0.0210096	0.999544	-3.34034
SESN1	-0.226254	9.20038	-2.42614	0.0210586	0.999544	-3.34167
AZI1	-0.17162	8.38028	-2.42527	0.0211012	0.999544	-3.34283
AP3S2	-0.164663	7.4721	-2.42403	0.0211615	0.999544	-3.34446
LOC642408	-0.15776	6.88151	-2.42203	0.0212599	0.999544	-3.34711
HUS1	-0.146331	7.06732	-2.42141	0.0212905	0.999544	-3.34794
LENEP	-0.146229	6.80791	-2.42139	0.0212914	0.999544	-3.34796
TSPYL6	-0.176959	7.14767	-2.4209	0.0213155	0.999544	-3.34861
GNB4	0.171554	7.55535	2.42043	0.0213386	0.999544	-3.34923
RDH14	0.147451	10.242	2.41917	0.0214011	0.999544	-3.3509
MXRA7	-0.181267	7.39133	-2.41914	0.0214025	0.999544	-3.35093
ZNF483	-0.190316	7.60292	-2.41871	0.0214239	0.999544	-3.35151
LOC728510	-0.168792	6.83653	-2.41854	0.0214322	0.999544	-3.35173
COL6A6	0.139502	6.8461	2.41717	0.0215004	0.999544	-3.35355
FLJ44112	0.19902	7.01124	2.41661	0.0215282	0.999544	-3.35428
LOC643757	0.144495	6.98523	2.416	0.0215585	0.999544	-3.35509
SELK	-0.21891	9.71239	-2.41555	0.021581	0.999544	-3.35568
LOC642130	0.160205	6.92132	2.41431	0.0216431	0.999544	-3.35733
DNAJA3	-0.146742	11.4667	-2.41429	0.0216442	0.999544	-3.35736
SURF6	0.162424	10.9266	2.41396	0.0216607	0.999544	-3.35779
SEC16B	-0.169944	6.89118	-2.41292	0.0217126	0.999544	-3.35916
LOC648754	0.212752	6.89764	2.41154	0.0217822	0.999544	-3.36099
MIR1286	-0.175224	6.93934	-2.41152	0.0217829	0.999544	-3.36101
WDR76	0.155142	7.55116	2.41077	0.021821	0.999544	-3.36201
CGA	0.17362	7.06347	2.41066	0.0218265	0.999544	-3.36215
KRT16	0.174175	7.01655	2.40991	0.021864	0.999544	-3.36313
LOC647753	-0.157704	6.91183	-2.40989	0.0218653	0.999544	-3.36317
SLCO3A1	0.177708	7.86436	2.40834	0.0219437	0.999544	-3.36521
LOC649752	-0.135739	6.88652	-2.4079	0.0219662	0.999544	-3.3658
AIPL1	-0.13775	6.93868	-2.40788	0.0219671	0.999544	-3.36582
LOC732387	0.155957	6.98126	2.40599	0.0220629	0.999544	-3.36831
PLB1	0.154022	6.95874	2.40595	0.0220649	0.999544	-3.36836
FLJ25439	0.159866	7.12061	2.40576	0.0220746	0.999544	-3.36861
CREM	-0.187496	6.87532	-2.40501	0.0221132	0.999544	-3.36961
SPIN3	-0.200053	7.19321	-2.40436	0.022146	0.999544	-3.37045
LOC653148	-0.148773	6.90733	-2.40366	0.0221821	0.999544	-3.37138
SFTPD	0.182219	7.04037	2.40297	0.0222176	0.999544	-3.3723
DACH1	0.192424	11.0649	2.40291	0.0222205	0.999544	-3.37237
FAM27L	0.190692	7.08581	2.40288	0.0222219	0.999544	-3.37241
TMEM188	-0.168511	8.66833	-2.40019	0.0223601	0.999544	-3.37595
DMTF1	-0.188039	7.94492	-2.39957	0.0223924	0.999544	-3.37678
ICOSLG	0.17753	7.68314	2.39931	0.0224055	0.999544	-3.37711
LOC646374	0.154671	6.86351	2.39832	0.0224569	0.999544	-3.37842
PIAS2	0.176961	8.6409	2.39779	0.0224843	0.999544	-3.37912
ALKBH4	0.141519	7.64478	2.39678	0.0225368	0.999544	-3.38045
KYNU	0.173577	9.60214	2.39668	0.0225415	0.999544	-3.38057
LOC100133167	-0.151112	6.90716	-2.3959	0.0225824	0.999544	-3.3816
RUNDC2B	0.178174	7.04244	2.39506	0.0226262	0.999544	-3.38271
CLDN23	-0.14304	8.57054	-2.39467	0.0226462	0.999544	-3.38321
LOC653907	0.15598	6.94975	2.39326	0.0227199	0.999544	-3.38507
KLHDC2	-0.18419	9.1128	-2.39318	0.022724	0.999544	-3.38517
WDR41	-0.154765	9.37905	-2.39287	0.0227403	0.999544	-3.38558
KRT1	-0.140967	6.79414	-2.39243	0.0227636	0.999544	-3.38617
LRRC16B	0.179918	7.19864	2.39185	0.0227939	0.999544	-3.38693
WNT10B	0.192282	7.38155	2.39156	0.0228089	0.999544	-3.3873
LOC647873	0.164864	7.00358	2.39105	0.0228357	0.999544	-3.38797
SCRN1	0.140307	6.80516	2.39096	0.0228405	0.999544	-3.38809
LOC647008	-0.203205	6.88851	-2.39084	0.0228469	0.999544	-3.38825
CHRNG	-0.181927	6.77941	-2.39037	0.0228716	0.999544	-3.38887
SALL3	-0.163476	6.931	-2.38971	0.0229066	0.999544	-3.38974
C11orf34	-0.142048	6.94159	-2.38916	0.0229355	0.999544	-3.39047
RDH13	0.142062	8.8076	2.38906	0.0229406	0.999544	-3.39059
TRAPPC9	0.177714	7.70533	2.38877	0.0229557	0.999544	-3.39097
UCP1	-0.16727	7.00657	-2.38817	0.0229878	0.999544	-3.39176
GSC2	0.186926	6.86222	2.38753	0.0230214	0.999544	-3.3926
SLC43A3	0.172498	9.59916	2.38753	0.0230215	0.999544	-3.3926
SRXN1	0.185544	9.46444	2.38634	0.0230843	0.999544	-3.39416
OR4D1	-0.152959	6.98366	-2.386	0.0231026	0.999544	-3.39461
LOC654163	0.173456	6.96752	2.38434	0.0231907	0.999544	-3.39678
MT1IP	-0.160658	6.95581	-2.38421	0.0231977	0.999544	-3.39696
CCT6B	0.153175	7.88273	2.38306	0.0232594	0.999544	-3.39847
TMEM99	-0.136671	9.63639	-2.38273	0.0232767	0.999544	-3.3989
LOC729506	0.168912	6.9987	2.38146	0.0233446	0.999544	-3.40056
TRIM46	0.214039	7.3117	2.38098	0.0233704	0.999544	-3.40119
HIGD1B	-0.212804	6.78133	-2.38023	0.0234106	0.999544	-3.40217
LOC645217	0.162985	7.06857	2.38007	0.0234193	0.999544	-3.40238
POTEH	0.166321	6.91378	2.37997	0.0234247	0.999544	-3.40252
NLK	-0.17146	7.312	-2.37966	0.0234416	0.999544	-3.40293
WDR72	-0.147339	6.73745	-2.37948	0.0234513	0.999544	-3.40316
ACRC	-0.144111	7.11398	-2.37904	0.023475	0.999544	-3.40374
C10orf50	-0.149948	6.9059	-2.37864	0.0234962	0.999544	-3.40426
LOC729349	-0.15338	6.85389	-2.37663	0.0236048	0.999544	-3.40689
ECHS1	-0.130247	11.3833	-2.37639	0.0236183	0.999544	-3.40721
GDAP1L1	-0.172326	6.90299	-2.37605	0.0236362	0.999544	-3.40765
LOC643125	0.157236	6.97762	2.37259	0.0238248	0.999544	-3.41218
RAB25	0.156049	6.87951	2.37106	0.0239084	0.999544	-3.41418
LRRC69	0.150325	7.10111	2.37095	0.0239142	0.999544	-3.41432
RINL	-0.225375	7.88687	-2.37078	0.0239239	0.999544	-3.41455
MAGEE1	-0.15465	7.05563	-2.37044	0.0239425	0.999544	-3.415
SRP14	-0.181197	12.8939	-2.36952	0.0239928	0.999544	-3.41619
UNG	0.155454	11.0051	2.36931	0.0240045	0.999544	-3.41647
LOC389765	-0.221344	7.31024	-2.36833	0.0240586	0.999544	-3.41776
MIR199A2	-0.190966	6.89297	-2.3679	0.024082	0.999544	-3.41831
LOC731007	0.167508	7.08934	2.36751	0.0241037	0.999544	-3.41883
C5orf28	-0.336541	9.13732	-2.36626	0.0241728	0.999544	-3.42046
SUPV3L1	0.153684	8.91565	2.36598	0.024188	0.999544	-3.42082
LOC727762	0.170655	7.21363	2.36574	0.0242017	0.999544	-3.42114
KLRAQ1	-0.169309	8.78373	-2.36543	0.0242187	0.999544	-3.42154
FBXL7	0.168367	6.88386	2.36505	0.0242396	0.999544	-3.42203
OR52A5	0.146727	7.02552	2.36502	0.0242412	0.999544	-3.42207
C9orf69	0.140723	9.24718	2.36357	0.0243219	0.999544	-3.42397
LOC100134331	0.155037	6.87679	2.36348	0.0243269	0.999544	-3.42408
NPFFR1	0.163211	6.77748	2.36314	0.0243461	0.999544	-3.42453
TLR10	-0.148153	7.03053	-2.36256	0.0243781	0.999544	-3.42528
LOC652698	-0.168255	7.18922	-2.36185	0.0244176	0.999544	-3.42621
FAM119B	0.154488	9.3503	2.36036	0.0245012	0.999544	-3.42816
SLED1	-0.149933	7.0701	-2.35915	0.0245689	0.999544	-3.42973
LOC728844	-0.162358	7.20253	-2.3579	0.024639	0.999544	-3.43136
LRFN4	0.204399	7.83294	2.35741	0.0246667	0.999544	-3.432
OSTalpha	0.14005	6.99729	2.35723	0.024677	0.999544	-3.43224
FAM7A1	0.170935	7.20323	2.35675	0.0247038	0.999544	-3.43286
DLL1	-0.138636	7.42325	-2.35645	0.024721	0.999544	-3.43325
LOC653683	-0.160535	6.88958	-2.35532	0.0247847	0.999544	-3.43472
C19orf47	0.20372	7.20313	2.355	0.0248032	0.999544	-3.43515
FLJ16165	-0.156124	6.94063	-2.35479	0.0248147	0.999544	-3.43541
DUOXA1	0.171263	6.87994	2.35474	0.0248179	0.999544	-3.43548
OR56B1	-0.204498	7.1783	-2.35424	0.0248459	0.999544	-3.43613
SIM2	-0.19777	7.06867	-2.35413	0.0248523	0.999544	-3.43627
DLG4	-0.172998	7.15715	-2.35411	0.0248534	0.999544	-3.4363
TTC8	-0.170543	7.08724	-2.35406	0.0248561	0.999544	-3.43636
NFIB	0.180993	6.97945	2.35404	0.0248574	0.999544	-3.43639
MIR7-3	-0.155347	6.87335	-2.35259	0.02494	0.999544	-3.43828
FOXI1	-0.134724	6.93122	-2.35214	0.0249656	0.999544	-3.43887
METTL8	-0.178879	6.9265	-2.35178	0.0249859	0.999544	-3.43933
STX3	-0.163958	8.64638	-2.35149	0.0250027	0.999544	-3.43971
LOC100132880	0.158907	6.85011	2.35121	0.0250186	0.999544	-3.44008
SNORD113-8	-0.137863	6.8785	-2.35119	0.0250197	0.999544	-3.4401
DISP1	-0.147265	7.11161	-2.3503	0.0250706	0.999544	-3.44126
C14orf131	-0.181989	8.30306	-2.35027	0.0250724	0.999544	-3.4413
MGC45922	-0.158715	6.94489	-2.35	0.0250877	0.999544	-3.44165
NIPSNAP3B	0.193901	6.93317	2.34941	0.0251215	0.999544	-3.44242
ITGBL1	0.152428	6.92557	2.34612	0.0253103	0.999544	-3.44669
LOC642636	-0.193755	7.19106	-2.34599	0.0253182	0.999544	-3.44686
CCNB2	-0.137656	11.4693	-2.34582	0.025328	0.999544	-3.44708
LOC729660	-0.187243	7.87876	-2.34538	0.0253532	0.999544	-3.44765
PADI4	-0.152058	7.25384	-2.3443	0.0254154	0.999544	-3.44905
MARCH7	-0.157097	10.9951	-2.34387	0.0254404	0.999544	-3.44961
GNPDA1	-0.210467	10.7654	-2.34218	0.0255388	0.999544	-3.45181
ZNF232	-0.138897	7.75074	-2.3416	0.0255726	0.999544	-3.45256
C2orf37	0.150977	7.30842	2.34143	0.0255826	0.999544	-3.45279
KIAA0174	-0.141013	10.607	-2.34072	0.0256238	0.999544	-3.4537
LOC100131044	-0.147247	7.02847	-2.34046	0.0256392	0.999544	-3.45405
DAZAP1	0.143683	10.4401	2.34009	0.0256605	0.999544	-3.45452
LOC643382	-0.173985	6.94751	-2.33985	0.0256748	0.999544	-3.45484
BDKRB1	-0.167552	6.83058	-2.33947	0.0256969	0.999544	-3.45533
LILRB1	-0.318934	10.9806	-2.3383	0.0257652	0.999544	-3.45684
ZYG11B	-0.187871	8.95831	-2.33798	0.0257838	0.999544	-3.45725
ODC1	0.208415	11.8089	2.33754	0.0258097	0.999544	-3.45782
HOXD3	-0.161069	7.17479	-2.33731	0.0258235	0.999544	-3.45813
TAAR8	-0.187641	7.06516	-2.33726	0.0258266	0.999544	-3.4582
KIAA1160	-0.16091	9.71008	-2.33602	0.0258992	0.999544	-3.4598
C20orf62	-0.182402	7.09743	-2.33583	0.0259106	0.999544	-3.46005
LOC728393	-0.142888	6.88775	-2.33578	0.0259132	0.999544	-3.4601
LOC100129975	-0.183954	7.02858	-2.33558	0.025925	0.999544	-3.46036
dJ222E13.2	0.156008	7.34823	2.33518	0.025949	0.999544	-3.46089
LOC647520	0.159277	7.0493	2.33511	0.025953	0.999544	-3.46098
KCNE4	0.176626	6.80391	2.3348	0.0259713	0.999544	-3.46138
ENO3	-0.159691	7.38498	-2.3342	0.0260064	0.999544	-3.46215
ALDH1A3	-0.153713	7.19555	-2.33406	0.0260148	0.999544	-3.46233
AICDA	-0.173085	7.03596	-2.33403	0.0260168	0.999544	-3.46238
KIF17	0.141538	6.75667	2.33187	0.0261446	0.999544	-3.46517
LOC647958	-0.170103	7.19315	-2.3316	0.0261605	0.999544	-3.46552
LOC729339	0.155389	6.91061	2.33025	0.0262411	0.999544	-3.46727
C17orf88	-0.165908	7.45368	-2.33005	0.0262528	0.999544	-3.46752
PODXL	0.132128	6.93651	2.32925	0.0263006	0.999544	-3.46856
LOC100134236	0.153029	6.89372	2.32876	0.02633	0.999544	-3.4692
PTPLAD2	-0.2668	7.85215	-2.32778	0.0263886	0.999544	-3.47046
UTS2R	0.150846	6.98491	2.32748	0.0264064	0.999544	-3.47085
LOXL4	-0.160386	6.93759	-2.32687	0.0264432	0.999544	-3.47164
OR2A14	0.184406	7.10877	2.32679	0.0264481	0.999544	-3.47175
CASC1	-0.154909	6.74824	-2.32627	0.0264795	0.999544	-3.47242
CLK1	-0.231359	9.03343	-2.32624	0.0264813	0.999544	-3.47246
MITD1	-0.172954	9.8131	-2.32552	0.0265245	0.999544	-3.47339
TMEM41B	-0.152956	9.35202	-2.32493	0.0265602	0.999544	-3.47415
OR12D2	-0.154435	6.90141	-2.32483	0.026566	0.999544	-3.47428
LOC497256	0.18929	6.99276	2.32197	0.0267391	0.999544	-3.47798
LOC730811	0.168376	6.87005	2.32034	0.0268377	0.999544	-3.48008
NBEA	-0.12204	6.99608	-2.31885	0.0269283	0.999544	-3.482
LOC284023	-0.171335	8.31325	-2.31855	0.0269469	0.999544	-3.48239
C1orf172	0.188032	6.96423	2.31823	0.0269667	0.999544	-3.48281
LOC729312	0.142339	6.93521	2.31727	0.0270254	0.999544	-3.48405
USP22	0.165967	7.59973	2.31501	0.0271637	0.999544	-3.48695
SGMS1	0.187739	7.05743	2.3147	0.0271826	0.999544	-3.48735
LIPL4	-0.163075	7.05862	-2.31447	0.0271971	0.999544	-3.48765
LOC388925	-0.168043	7.06317	-2.3142	0.0272139	0.999544	-3.488
C6orf26	-0.143197	6.95388	-2.31414	0.0272173	0.999544	-3.48807
AIF1L	-0.162247	7.42252	-2.31232	0.0273294	0.999544	-3.49041
LOC440518	0.151903	7.00982	2.3122	0.0273373	0.999544	-3.49058
FLJ35776	-0.181713	7.01917	-2.31213	0.0273415	0.999544	-3.49067
LOC649404	0.164586	6.92333	2.31205	0.0273462	0.999544	-3.49076
LOC653438	0.182596	9.07075	2.31149	0.0273808	0.999544	-3.49148
NUPL2	-0.165019	9.63105	-2.31106	0.0274074	0.999544	-3.49204
TICAM2	-0.174406	7.31471	-2.3106	0.0274361	0.999544	-3.49263
LOC729495	0.161178	9.40632	2.31029	0.0274554	0.999544	-3.49303
POLM	-0.181591	7.30868	-2.30959	0.0274988	0.999544	-3.49393
LOC729526	0.144675	6.91186	2.30915	0.0275263	0.999544	-3.4945
AES	0.193276	8.95297	2.30867	0.0275564	0.999544	-3.49512
LOC644048	0.145072	6.8886	2.30823	0.0275834	0.999544	-3.49568
ZNF486	-0.405622	10.0015	-2.30815	0.0275887	0.999544	-3.49579
PKMYT1	0.169101	7.95868	2.30812	0.0275904	0.999544	-3.49582
ZC3H8	-0.155218	8.56394	-2.30724	0.0276452	0.999544	-3.49695
FLJ35379	-0.129827	6.90385	-2.30724	0.0276457	0.999544	-3.49696
PSORS1C2	-0.152655	6.96023	-2.30683	0.0276712	0.999544	-3.49749
OR7E24	-0.140567	7.00318	-2.30625	0.0277076	0.999544	-3.49824
TDG	-0.172321	11.0652	-2.30605	0.0277198	0.999544	-3.49849
MTA1	-0.150909	8.62003	-2.30605	0.0277199	0.999544	-3.49849
IL21	0.146478	6.84224	2.30564	0.0277459	0.999544	-3.49902
C13orf25	-0.186769	7.41794	-2.30543	0.0277585	0.999544	-3.49928
UGCGL1	0.186098	8.00531	2.30542	0.0277596	0.999544	-3.4993
NUAK1	0.16004	7.29815	2.30507	0.0277815	0.999544	-3.49975
YIPF6	-0.162394	8.50751	-2.30468	0.0278055	0.999544	-3.50025
KLF11	-0.151696	8.44854	-2.30433	0.0278278	0.999544	-3.5007
SPAG6	0.151265	7.57672	2.30432	0.0278285	0.999544	-3.50072
LOC391045	0.153448	7.11409	2.30422	0.0278349	0.999544	-3.50085
KIF3A	0.150225	6.70142	2.30407	0.0278441	0.999544	-3.50103
ATP8B4	-0.202477	10.3466	-2.30405	0.0278451	0.999544	-3.50106
TNFSF18	-0.193072	6.84651	-2.30355	0.0278769	0.999544	-3.5017
CREB1	-0.294461	11.3606	-2.30328	0.0278937	0.999544	-3.50205
LOC646066	-0.142867	6.86037	-2.30291	0.0279171	0.999544	-3.50252
IFFO1	-0.190033	9.24683	-2.30261	0.0279359	0.999544	-3.50291
FUT3	0.134487	6.82905	2.302	0.0279748	0.999544	-3.5037
SDR42E1	-0.175394	7.04269	-2.30184	0.0279846	0.999544	-3.5039
C6orf72	0.182078	8.18356	2.30098	0.0280392	0.999544	-3.50501
LOC653803	-0.165934	7.27288	-2.30065	0.0280597	0.999544	-3.50542
TRIB1	-0.190218	8.30789	-2.29993	0.0281053	0.999544	-3.50635
MED28	-0.136104	10.373	-2.29869	0.0281845	0.999544	-3.50795
LOC100132144	-0.179831	6.94897	-2.29846	0.0281988	0.999544	-3.50824
PCDHGB3	0.157359	6.81566	2.29811	0.0282215	0.999544	-3.5087
PIP5K3	0.137746	6.95746	2.29803	0.0282261	0.999544	-3.50879
NUP93	0.168968	10.3123	2.29756	0.0282559	0.999544	-3.50939
LOC728098	0.159281	9.23316	2.29743	0.0282642	0.999544	-3.50956
C13orf1	-0.152615	8.39761	-2.29715	0.0282821	0.999544	-3.50992
C14orf39	0.188183	7.0525	2.29708	0.0282867	0.999544	-3.51001
LOC642278	-0.132905	7.07503	-2.29701	0.0282911	0.999544	-3.5101
LOC646748	0.154102	6.9841	2.29698	0.0282935	0.999544	-3.51014
LOC648955	0.176166	6.95685	2.29675	0.0283077	0.999544	-3.51043
LOC645033	0.220547	6.99664	2.29669	0.0283116	0.999544	-3.51051
TATDN3	-0.140364	8.92213	-2.29637	0.0283319	0.999544	-3.51092
ACOX2	-0.18246	7.35112	-2.29602	0.0283543	0.999544	-3.51137
LOC646243	-0.148779	7.02564	-2.29531	0.0284001	0.999544	-3.51228
DLAT	0.171048	9.6798	2.29454	0.0284491	0.999544	-3.51326
GPR50	0.178194	6.895	2.29451	0.0284509	0.999544	-3.5133
LOC650410	0.161125	6.92201	2.29449	0.0284524	0.999544	-3.51333
LOC100133177	-0.333488	11.769	-2.29414	0.0284749	0.999544	-3.51378
LOC651476	-0.157055	6.87275	-2.29322	0.0285341	0.999544	-3.51496
OR2A9P	-0.138823	6.97101	-2.29265	0.0285709	0.999544	-3.51569
RNF165	-0.186216	7.00431	-2.29263	0.0285719	0.999544	-3.51572
C6orf146	0.136735	6.74726	2.29243	0.0285849	0.999544	-3.51597
C2orf90	0.154309	6.90571	2.29235	0.0285899	0.999544	-3.51607
LOC286528	0.174927	6.95743	2.29101	0.0286761	0.999544	-3.51779
LOC728470	-0.137143	7.00413	-2.291	0.0286772	0.999544	-3.51781
SLC24A5	0.16766	6.87001	2.29094	0.0286807	0.999544	-3.51788
SNRK	-0.122146	9.82384	-2.29093	0.0286815	0.999544	-3.51789
CCR6	-0.291167	13.1275	-2.2907	0.0286967	0.999544	-3.51819
RG9MTD1	0.244265	9.27038	2.29064	0.0287001	0.999544	-3.51826
NCOA5	0.143183	8.89015	2.29014	0.0287323	0.999544	-3.5189
LOC651308	0.163673	6.95048	2.28999	0.0287426	0.999544	-3.5191
C1R	0.132635	7.07267	2.28946	0.0287764	0.999544	-3.51977
MTMR15	-0.164961	7.45199	-2.28831	0.0288513	0.999544	-3.52125
POLR3B	0.135616	9.22473	2.28793	0.0288761	0.999544	-3.52174
MOSC2	-0.144638	6.81153	-2.28769	0.0288915	0.999544	-3.52204
CST9L	-0.154543	6.83117	-2.28663	0.0289607	0.999544	-3.5234
SSH3	-0.204662	8.67591	-2.28661	0.0289617	0.999544	-3.52342
FAM41C	0.174169	6.92938	2.28588	0.0290097	0.999544	-3.52436
PRINS	0.195311	6.96961	2.28581	0.0290142	0.999544	-3.52445
SLC23A1	0.141706	7.01897	2.28529	0.0290479	0.999544	-3.52511
LOC651100	-0.163329	6.94395	-2.28506	0.0290628	0.999544	-3.5254
C16orf42	0.149989	7.9298	2.28379	0.0291463	0.999544	-3.52703
ZNF252	-0.197388	9.48009	-2.28366	0.0291545	0.999544	-3.52719
DYM	0.190872	9.57894	2.28357	0.0291608	0.999544	-3.52732
BAZ1A	0.166138	10.0234	2.28355	0.0291619	0.999544	-3.52734
LOC100132810	0.151031	7.00147	2.28341	0.0291713	0.999544	-3.52752
LOC400590	-0.183234	7.02554	-2.28328	0.0291794	0.999544	-3.52768
HKR1	-0.148017	7.08991	-2.28325	0.0291817	0.999544	-3.52772
LOC401098	-0.276833	7.93729	-2.28307	0.0291931	0.999544	-3.52795
ATXN7L3	0.152612	8.54087	2.2829	0.0292048	0.999544	-3.52817
LOC642141	-0.176202	6.95597	-2.28278	0.0292121	0.999544	-3.52832
FRY	-0.144037	7.15311	-2.28266	0.0292204	0.999544	-3.52848
LOC651850	0.156897	6.97344	2.27895	0.0294649	0.999544	-3.53321
ACTG2	-0.132498	6.72962	-2.27842	0.0295001	0.999544	-3.53389
PIGX	-0.231133	7.58487	-2.27712	0.0295862	0.999544	-3.53555
EPB49	-0.164531	6.86941	-2.27678	0.0296089	0.999544	-3.53599
SRA1	-0.129271	7.98734	-2.27581	0.0296733	0.999544	-3.53722
LOC401233	-0.143787	7.10867	-2.27576	0.0296767	0.999544	-3.53729
BTBD6	-0.137306	9.50557	-2.27529	0.029708	0.999544	-3.53788
LOC644365	0.141818	6.94683	2.27415	0.0297839	0.999544	-3.53933
LOC100132769	0.153882	6.97342	2.27301	0.0298604	0.999544	-3.54079
KIR2DL3	-0.330805	7.85908	-2.27278	0.0298759	0.999544	-3.54109
NIPA2	0.159386	11.6376	2.27249	0.029895	0.999544	-3.54145
PPM1H	-0.142304	6.94131	-2.2721	0.0299211	0.999544	-3.54195
OR1M1	0.132355	6.74644	2.27187	0.0299364	0.999544	-3.54224
ANKZF1	-0.161425	7.74675	-2.27118	0.0299829	0.999544	-3.54312
T-SP1	0.153508	7.10648	2.27015	0.0300525	0.999544	-3.54444
FRMPD2L2	-0.139731	6.96272	-2.27001	0.0300621	0.999544	-3.54462
LOC100128819	-0.126051	6.82733	-2.26979	0.0300766	0.999544	-3.54489
MIR450A1	-0.146547	7.08074	-2.26957	0.0300915	0.999544	-3.54517
MIR941-2	0.153044	6.81239	2.2695	0.0300964	0.999544	-3.54527
PLA2G1B	0.141705	6.88128	2.26937	0.0301049	0.999544	-3.54543
GLCE	-0.183777	7.80275	-2.26921	0.0301154	0.999544	-3.54563
LOC402538	0.154725	6.99528	2.26909	0.0301237	0.999544	-3.54578
TPSG1	-0.144704	6.84759	-2.26903	0.0301277	0.999544	-3.54586
CCDC137	0.241996	7.65602	2.26809	0.0301912	0.999544	-3.54705
DNMT3L	0.158074	6.92532	2.2678	0.0302113	0.999544	-3.54743
TNNT3	0.135243	6.84546	2.26698	0.0302666	0.999544	-3.54847
IGLL3	0.148103	7.09613	2.26671	0.0302848	0.999544	-3.54881
ABCC4	0.146973	9.16722	2.26601	0.0303325	0.999544	-3.54971
C11orf9	-0.157192	6.90722	-2.26561	0.0303596	0.999544	-3.55021
NKX6-2	0.138951	6.8028	2.26476	0.0304171	0.999544	-3.55129
FLJ40434	-0.144939	6.89721	-2.26472	0.0304202	0.999544	-3.55135
TPRX1	-0.154691	6.75934	-2.26383	0.0304809	0.999544	-3.55248
LOC399942	0.233277	12.0326	2.26284	0.0305485	0.999544	-3.55374
ADH1C	0.138788	6.91718	2.26118	0.030662	0.999544	-3.55584
TMEM134	0.215421	7.87259	2.26004	0.0307401	0.999544	-3.55729
LOC646574	-0.166214	6.97107	-2.25916	0.0308008	0.999544	-3.55841
RAB30	0.126428	6.92287	2.2591	0.0308052	0.999544	-3.55849
PABPC1L	-0.129968	7.19317	-2.25884	0.0308226	0.999544	-3.55881
DNAJA4	-0.212248	9.09719	-2.25658	0.0309787	0.999544	-3.56168
ZNF248	-0.154033	7.36438	-2.25624	0.0310023	0.999544	-3.56211
LOC647704	-0.150224	6.91616	-2.25604	0.0310166	0.999544	-3.56237
GPI	0.142065	11.6249	2.25576	0.0310356	0.999544	-3.56272
LOC100133774	0.150809	6.87332	2.25509	0.0310822	0.999544	-3.56357
SNORA11B	-0.207831	7.00553	-2.2541	0.031151	0.999544	-3.56483
LOC642947	-0.323272	11.6464	-2.25408	0.0311528	0.999544	-3.56486
PTPN14	0.170569	6.83092	2.25389	0.0311655	0.999544	-3.56509
CHRNA1	-0.153969	7.10241	-2.25359	0.0311867	0.999544	-3.56548
FAM195B	0.159727	8.11984	2.25317	0.0312162	0.999544	-3.56601
FLJ10213	-0.181134	7.6144	-2.25298	0.031229	0.999544	-3.56625
CD96	-0.148233	6.84669	-2.25205	0.0312938	0.999544	-3.56742
INE2	0.134429	6.85736	2.25195	0.0313012	0.999544	-3.56756
LOC648003	-0.135935	6.92168	-2.25037	0.0314118	0.999544	-3.56956
CCDC97	0.223477	9.64626	2.2501	0.0314307	0.999544	-3.5699
ATOH8	-0.149873	6.90953	-2.24939	0.0314803	0.999544	-3.5708
KIF27	0.138688	7.13866	2.2483	0.0315569	0.999544	-3.57218
PHOX2A	-0.154252	6.97969	-2.24805	0.0315747	0.999544	-3.5725
LIG4	0.153915	7.32856	2.2473	0.0316277	0.999544	-3.57345
PI4KAP2	-0.153084	8.40587	-2.24721	0.0316341	0.999544	-3.57356
LOC651059	-0.162061	6.85137	-2.24709	0.031642	0.999544	-3.5737
LOC646350	-0.175527	6.98235	-2.24687	0.0316578	0.999544	-3.57399
OR2AG1	-0.137368	6.85436	-2.24615	0.0317087	0.999544	-3.5749
NPL	0.162812	8.55603	2.24492	0.0317958	0.999544	-3.57646
LOC729189	-0.163333	6.86334	-2.24443	0.0318307	0.999544	-3.57708
C12orf8	0.159252	6.98608	2.24412	0.0318525	0.999544	-3.57747
KIAA0528	-0.154949	9.95429	-2.2438	0.0318752	0.999544	-3.57787
SIGLECP3	0.145492	7.06199	2.24325	0.0319145	0.999544	-3.57857
C9orf96	0.169269	6.96056	2.24317	0.0319199	0.999544	-3.57867
C11orf37	-0.21099	6.96742	-2.24314	0.031922	0.999544	-3.5787
FAM151A	0.142131	7.08979	2.24289	0.0319397	0.999544	-3.57902
LOC442519	0.148436	6.98033	2.24252	0.0319663	0.999544	-3.57949
LOC100131392	0.151181	6.85664	2.24208	0.0319976	0.999544	-3.58005
H2AFB1	0.140194	6.98314	2.24179	0.0320185	0.999544	-3.58042
LOC643959	0.156998	7.02449	2.24174	0.032022	0.999544	-3.58048
LOC93556	0.169163	6.89573	2.24166	0.0320271	0.999544	-3.58057
C12orf48	-0.171539	9.53271	-2.24156	0.0320343	0.999544	-3.5807
MAP2K3	-0.169904	8.82465	-2.24076	0.032092	0.999544	-3.58172
LOC644689	0.152619	6.97014	2.24043	0.0321154	0.999544	-3.58213
PHF10	0.146167	9.69901	2.23993	0.032151	0.999544	-3.58276
COL29A1	0.154108	6.90471	2.23877	0.0322345	0.999544	-3.58423
LOC100132493	-0.155032	7.08227	-2.23874	0.0322366	0.999544	-3.58427
TRAPPC2P1	-0.165902	8.51964	-2.23869	0.0322399	0.999544	-3.58433
LOC100131250	-0.147237	7.03287	-2.23863	0.0322444	0.999544	-3.58441
LOC654201	0.160913	6.87656	2.23789	0.0322977	0.999544	-3.58534
LOC100133797	0.240885	7.57224	2.23763	0.0323159	0.999544	-3.58566
SRPK1	0.153478	11.3428	2.23682	0.0323747	0.999544	-3.58669
KIAA1109	-0.144705	6.9491	-2.23677	0.0323778	0.999544	-3.58675
TFG	0.193949	10.4033	2.23664	0.0323876	0.999544	-3.58692
MIR638	0.158618	7.08355	2.23594	0.0324375	0.999544	-3.58779
LOC342531	0.141365	6.96981	2.23525	0.0324878	0.999544	-3.58867
CDAN1	-0.352981	11.2473	-2.23493	0.0325106	0.999544	-3.58907
SFI1	0.121994	6.91445	2.2349	0.0325126	0.999544	-3.5891
S100A13	-0.188174	8.25197	-2.23487	0.0325148	0.999544	-3.58914
LOC730839	0.149644	7.00599	2.23473	0.0325255	0.999544	-3.58933
OVGP1	-0.161244	7.06669	-2.23448	0.0325433	0.999544	-3.58964
MACC1	-0.162212	6.97255	-2.23419	0.0325643	0.999544	-3.59
CDC34	0.180998	8.2981	2.23383	0.0325904	0.999544	-3.59046
ZNF44	-0.195486	6.75563	-2.23375	0.0325963	0.999544	-3.59056
LOC100131289	-0.14929	7.04543	-2.23352	0.0326127	0.999544	-3.59085
LOC653115	0.152411	7.15993	2.23054	0.0328298	0.999544	-3.59461
PPHLN1	0.170676	10.3017	2.2304	0.0328399	0.999544	-3.59478
LOC123876	0.137803	6.7839	2.22986	0.0328791	0.999544	-3.59546
ZNF501	0.139347	6.78917	2.22964	0.0328949	0.999544	-3.59573
SULT6B1	0.1557	7.06121	2.22834	0.0329903	0.999544	-3.59737
DPP4	0.181474	7.01084	2.22732	0.0330654	0.999544	-3.59866
OR13H1	-0.141664	6.78438	-2.22711	0.0330808	0.999544	-3.59893
MIR331	-0.15331	6.98878	-2.22653	0.0331234	0.999544	-3.59966
SOCS6	0.230914	7.02576	2.22547	0.0332014	0.999544	-3.60099
SFRP2	0.155381	6.90007	2.22495	0.0332396	0.999544	-3.60164
LOC653878	0.179336	7.28613	2.22467	0.0332597	0.999544	-3.60199
RNF4	0.18042	8.51238	2.22402	0.0333079	0.999544	-3.60281
C4orf43	0.160934	7.08108	2.22353	0.0333444	0.999544	-3.60343
OR6P1	-0.155044	6.89425	-2.22325	0.0333648	0.999544	-3.60377
LOC100131811	-0.152844	6.98128	-2.2226	0.0334134	0.999544	-3.6046
LOC652688	-0.143421	6.93342	-2.22117	0.033519	0.999544	-3.60639
LOC440335	-0.161095	6.92561	-2.22081	0.033546	0.999544	-3.60684
GM2A	0.157347	7.49388	2.2204	0.0335765	0.999544	-3.60736
JUNB	-0.163088	7.49564	-2.2204	0.0335768	0.999544	-3.60736
LOC643175	-0.151718	6.879	-2.22037	0.0335788	0.999544	-3.6074
ANKRD49	-0.160307	8.73833	-2.21953	0.033641	0.999544	-3.60845
CDC23	0.135106	10.2177	2.21913	0.0336708	0.999544	-3.60895
HPCA	0.160261	6.91251	2.21884	0.0336925	0.999544	-3.60931
RCCD1	-0.200498	7.66686	-2.21851	0.0337173	0.999544	-3.60973
MLF1IP	0.157993	7.99938	2.21779	0.0337708	0.999544	-3.61063
MIR767	-0.149401	6.83054	-2.21748	0.0337944	0.999544	-3.61102
GUCY2D	0.172968	7.00195	2.2174	0.0338004	0.999544	-3.61112
LOC440067	-0.123095	6.87446	-2.21732	0.0338067	0.999544	-3.61123
LOC649891	0.171935	7.05418	2.21664	0.033857	0.999544	-3.61207
PMS2L3	0.18566	7.77812	2.21622	0.0338886	0.999544	-3.6126
ZFYVE19	-0.162442	8.55832	-2.21529	0.0339587	0.999544	-3.61377
CAPZB	0.141641	9.56782	2.21439	0.0340262	0.999544	-3.6149
FLJ13614	-0.177999	6.8795	-2.21418	0.034042	0.999544	-3.61516
LOC646734	-0.147173	7.02333	-2.21328	0.0341097	0.999544	-3.61629
NOC2L	0.186697	7.64814	2.21294	0.0341353	0.999544	-3.61671
ACCN2	0.139674	7.15234	2.21211	0.0341986	0.999544	-3.61776
ADCK5	-0.142534	7.79109	-2.21209	0.0342002	0.999544	-3.61779
LOC645336	0.152693	6.94037	2.21164	0.0342341	0.999544	-3.61835
LOC645333	-0.147139	6.90302	-2.21106	0.0342782	0.999544	-3.61908
LOC729608	0.159943	11.9291	2.211	0.0342824	0.999544	-3.61915
TNKS2	0.157804	6.94496	2.21084	0.0342948	0.999544	-3.61935
CTXN2	0.12052	6.91226	2.20996	0.0343613	0.999544	-3.62045
LOC728255	0.154348	6.87972	2.2099	0.0343661	0.999544	-3.62053
BCL2L1	0.192501	8.72756	2.20902	0.0344329	0.999544	-3.62163
LOC100131949	0.154815	6.96989	2.20776	0.0345287	0.999544	-3.6232
SDHALP1	-0.368863	9.81376	-2.20759	0.0345416	0.999544	-3.62341
OKL38	0.350432	8.90987	2.20723	0.034569	0.999544	-3.62386
OR10A7	0.141424	6.997	2.20723	0.0345696	0.999544	-3.62387
MIR550-2	-0.13907	7.0171	-2.2069	0.0345943	0.999544	-3.62428
PDE4C	-0.3148	11.2722	-2.20616	0.0346515	0.999544	-3.62521
MIR1979	-0.163485	6.913	-2.20557	0.0346965	0.999544	-3.62595
LOC646573	0.144983	7.02325	2.20548	0.0347029	0.999544	-3.62605
TPRG1L	-0.160049	10.0876	-2.20397	0.0348191	0.999544	-3.62794
TRAF2	0.153535	7.50619	2.20386	0.0348276	0.999544	-3.62808
HTRA1	-0.132681	6.83643	-2.20341	0.0348619	0.999544	-3.62864
MIR802	0.14737	6.83364	2.20306	0.0348889	0.999544	-3.62908
CLDN7	0.176109	7.17786	2.20253	0.0349302	0.999544	-3.62975
TACR2	0.141697	7.18019	2.20126	0.035028	0.999544	-3.63133
CLCN5	0.140184	7.20111	2.20111	0.0350393	0.999544	-3.63151
DDX4	0.170728	6.93111	2.20073	0.0350688	0.999544	-3.63199
SAPS3	0.141282	8.50249	2.20049	0.0350876	0.999544	-3.63229
PTPDC1	-0.156875	7.06408	-2.19993	0.0351307	0.999544	-3.63299
LOC653321	-0.238688	7.00562	-2.19965	0.0351528	0.999544	-3.63334
LOC100134648	-0.16778	10.6589	-2.19904	0.0351997	0.999544	-3.6341
TNP1	-0.154045	7.06445	-2.19847	0.035244	0.999544	-3.63481
LOC644629	-0.15353	7.12875	-2.1979	0.0352883	0.999544	-3.63552
ITPKC	-0.169584	7.16331	-2.19648	0.0353995	0.999544	-3.6373
ELK1	0.16975	8.93317	2.19644	0.0354019	0.999544	-3.63734
ECT2L	-0.165927	7.06384	-2.19622	0.0354193	0.999544	-3.63762
OR2F2	-0.135627	6.81653	-2.19567	0.0354622	0.999544	-3.6383
LOC731511	-0.17539	6.93334	-2.1955	0.0354758	0.999544	-3.63852
LOC100132899	0.154072	6.87501	2.1948	0.0355307	0.999544	-3.6394
FAM134B	0.123374	6.98884	2.19458	0.0355473	0.999544	-3.63966
STAB1	-0.159716	6.84915	-2.19415	0.0355813	0.999544	-3.6402
RNASEH1	0.163325	9.50744	2.19395	0.0355969	0.999544	-3.64045
ST3GAL1	0.16946	8.70838	2.19394	0.0355977	0.999544	-3.64046
HPR	0.144207	7.0841	2.19236	0.0357216	0.999544	-3.64243
LOC647195	0.154357	7.75955	2.19229	0.0357275	0.999544	-3.64252
TPBG	0.137969	7.11167	2.19223	0.0357321	0.999544	-3.6426
MIR498	-0.153023	7.03889	-2.19151	0.0357889	0.999544	-3.64349
USP51	-0.139282	6.7249	-2.19106	0.035824	0.999544	-3.64405
LRRC37B	-0.188751	8.43959	-2.19099	0.0358302	0.999544	-3.64415
IHH	0.145749	6.94299	2.19028	0.0358861	0.999544	-3.64503
TBC1D3I	-0.137238	7.01441	-2.19	0.0359081	0.999544	-3.64537
LEPREL2	0.179824	7.01659	2.18986	0.0359189	0.999544	-3.64554
DDX5	0.1502	12.4301	2.18897	0.0359895	0.999544	-3.64665
ARG2	-0.143563	7.01344	-2.18847	0.036029	0.999544	-3.64728
PIGS	0.167891	8.97046	2.18768	0.0360917	0.999544	-3.64826
LOC100132426	0.149317	6.83428	2.18742	0.0361124	0.999544	-3.64858
ZNF700	-0.149811	9.21196	-2.18726	0.0361253	0.999544	-3.64879
TM2D1	-0.186802	10.1751	-2.18713	0.0361356	0.999544	-3.64895
FLJ42220	0.14593	6.95108	2.18665	0.0361737	0.999544	-3.64954
LOC442535	-0.136648	6.98501	-2.18584	0.0362381	0.999544	-3.65055
NOLA1	0.192154	9.42597	2.18578	0.0362427	0.999544	-3.65062
LOC100129022	-0.16885	7.50054	-2.18533	0.0362789	0.999544	-3.65119
TLR4	-0.185503	7.56297	-2.18527	0.0362836	0.999544	-3.65126
PKNOX1	-0.141501	7.75336	-2.18523	0.0362866	0.999544	-3.65131
ABHD6	-0.154392	7.26071	-2.18465	0.0363326	0.999544	-3.65202
COL27A1	-0.125657	6.82936	-2.18457	0.0363389	0.999544	-3.65212
DDX51	-0.332259	9.01838	-2.18444	0.0363493	0.999544	-3.65228
KCNK9	-0.146066	7.04463	-2.18433	0.0363582	0.999544	-3.65242
LOC652887	0.145137	7.01557	2.18402	0.0363832	0.999544	-3.65281
LOC642656	0.135041	6.84586	2.18358	0.0364181	0.999544	-3.65335
TTLL11	0.136122	7.07288	2.18319	0.0364496	0.999544	-3.65384
FLJ44450	0.179065	7.10996	2.18244	0.0365096	0.999544	-3.65477
MIR137	0.147083	6.91142	2.18204	0.0365419	0.999544	-3.65527
LOC728253	-0.317197	7.18105	-2.18126	0.0366045	0.999544	-3.65624
LOC440348	-0.187411	7.45476	-2.18067	0.0366519	0.999544	-3.65697
MRPL42P5	0.214765	7.12511	2.17935	0.0367583	0.999544	-3.65861
LOC388494	-0.134638	6.90335	-2.17917	0.0367727	0.999544	-3.65883
DSEL	-0.125976	6.99479	-2.179	0.0367863	0.999544	-3.65904
LOC100129988	-0.188897	7.03097	-2.17888	0.0367966	0.999544	-3.6592
PEX12	0.137189	6.91594	2.17845	0.036831	0.999544	-3.65973
CDH18	-0.1449	6.90329	-2.17818	0.036853	0.999544	-3.66007
HSD17B7	-0.233352	9.53583	-2.17805	0.0368633	0.999544	-3.66022
DEFB106A	0.129173	6.87158	2.17781	0.0368831	0.999544	-3.66053
LOC729078	-0.130255	6.82197	-2.17741	0.0369152	0.999544	-3.66102
TRPC4	-0.17768	7.02951	-2.17734	0.036921	0.999544	-3.66111
MTPN	0.147865	12.1357	2.17675	0.0369684	0.999544	-3.66183
NOXA1	-0.13634	6.99198	-2.17654	0.0369855	0.999544	-3.66209
CPT1C	-0.151841	6.84946	-2.17632	0.0370035	0.999544	-3.66237
LOC729310	0.142081	7.01972	2.17615	0.0370174	0.999544	-3.66258
MNX1	-0.160609	7.12093	-2.17601	0.0370289	0.999544	-3.66276
LOC340096	0.123163	6.87584	2.17591	0.0370367	0.999544	-3.66288
IGFL4	0.166317	6.93923	2.17554	0.037067	0.999544	-3.66334
DPH5	-0.193312	9.50566	-2.17543	0.0370761	0.999544	-3.66348
AIFM2	-0.142095	7.03411	-2.17535	0.0370821	0.999544	-3.66357
LOC728005	-0.145619	7.03329	-2.1749	0.0371189	0.999544	-3.66413
LOC723972	0.185651	9.83094	2.17453	0.0371487	0.999544	-3.66458
FAM92A3	-0.138954	6.83369	-2.1745	0.0371512	0.999544	-3.66462
PSME3	0.144674	9.73793	2.17442	0.0371579	0.999544	-3.66472
LOC652570	-0.140337	6.88945	-2.17406	0.0371872	0.999544	-3.66517
LOC100134560	0.161541	6.9753	2.1737	0.0372168	0.999544	-3.66562
LOC650354	-0.141521	6.92264	-2.17327	0.0372516	0.999544	-3.66615
SRRM4	0.129356	6.79292	2.17253	0.0373122	0.999544	-3.66706
IPMK	-0.181492	7.01769	-2.17251	0.0373142	0.999544	-3.66709
HOXA4	0.163116	7.02263	2.17245	0.0373186	0.999544	-3.66716
LOC728613	-0.137856	6.94943	-2.17232	0.0373292	0.999544	-3.66732
FBXO18	-0.186011	9.26804	-2.17218	0.0373405	0.999544	-3.66749
FAM75A4	0.160567	6.9545	2.17165	0.0373842	0.999544	-3.66815
B9D2	-0.154176	9.53595	-2.1709	0.037446	0.999544	-3.66909
LOC642623	0.143467	6.95456	2.17028	0.0374964	0.999544	-3.66985
LOC100132234	0.133272	6.96316	2.17011	0.0375107	0.999544	-3.67006
LOC152667	-0.179826	6.94488	-2.16845	0.0376475	0.999544	-3.67212
MED12L	-0.137431	6.84101	-2.16841	0.0376504	0.999544	-3.67216
LOC133993	0.155984	7.12573	2.16801	0.0376839	0.999544	-3.67267
LOC100134188	0.152681	7.26921	2.16792	0.0376906	0.999544	-3.67277
LOC100129667	-0.136087	6.9831	-2.16785	0.0376965	0.999544	-3.67286
ARHGAP11A	0.187744	7.75946	2.16648	0.0378101	0.999544	-3.67455
SAPS2	-0.183229	9.2131	-2.16632	0.0378232	0.999544	-3.67475
RNASE1	-0.162697	7.06838	-2.16597	0.0378522	0.999544	-3.67518
C11orf68	-0.145986	7.43802	-2.16587	0.0378602	0.999544	-3.6753
DEXI	-0.141441	10.1644	-2.16577	0.0378686	0.999544	-3.67543
CUTC	0.187882	9.73724	2.16572	0.0378724	0.999544	-3.67548
PTER	0.133204	8.28324	2.16548	0.0378926	0.999544	-3.67579
ZBTB37	-0.134512	6.91875	-2.16525	0.0379113	0.999544	-3.67607
LOC643327	0.141938	6.927	2.16483	0.0379467	0.999544	-3.67659
IQSEC1	0.138255	7.03253	2.16441	0.0379811	0.999544	-3.6771
FLJ35816	0.156132	7.00805	2.1644	0.0379821	0.999544	-3.67712
LOC440359	0.173187	10.0519	2.16358	0.0380501	0.999544	-3.67813
RFPL2	0.146389	6.87954	2.16327	0.0380762	0.999544	-3.67852
MGP	-0.153353	7.09287	-2.16285	0.0381116	0.999544	-3.67904
IFNA21	0.156193	7.10728	2.16262	0.03813	0.999544	-3.67931
LOC100130958	-0.172169	6.91109	-2.16258	0.0381336	0.999544	-3.67937
LOC649765	0.169952	6.9282	2.16249	0.0381415	0.999544	-3.67948
SIPA1L2	0.146303	7.21535	2.16233	0.0381545	0.999544	-3.67968
C11orf86	0.140397	6.92141	2.16215	0.0381692	0.999544	-3.67989
LOC340204	-0.161987	6.9248	-2.16202	0.0381803	0.999544	-3.68006
OR6C76	0.159506	6.81003	2.16184	0.0381955	0.999544	-3.68028
LOC729467	0.149862	6.83859	2.16143	0.0382299	0.999544	-3.68079
SNORD121B	-0.132907	6.88614	-2.16091	0.038273	0.999544	-3.68143
FAM75A1	-0.134452	7.01882	-2.16089	0.0382751	0.999544	-3.68146
ZACN	-0.12639	6.78182	-2.16042	0.038314	0.999544	-3.68203
ABLIM2	-0.151182	6.93503	-2.15996	0.0383526	0.999544	-3.6826
ZDHHC23	-0.158517	7.09978	-2.1598	0.0383661	0.999544	-3.6828
LOC642576	-0.140327	7.0032	-2.15892	0.0384404	0.999544	-3.68389
ZCWPW2	-0.15451	7.08897	-2.1583	0.0384923	0.999544	-3.68466
PHACS	0.143882	6.85262	2.1582	0.0385004	0.999544	-3.68477
FLJ39061	0.130327	7.03276	2.15743	0.0385655	0.999544	-3.68573
LOC652635	-0.121928	6.94653	-2.15604	0.0386824	0.999544	-3.68744
LOC645661	-0.163339	6.9212	-2.15602	0.0386839	0.999544	-3.68746
PRRX2	0.141732	6.75512	2.15578	0.0387041	0.999544	-3.68775
LOC642653	0.149977	6.94153	2.15509	0.0387627	0.999544	-3.68861
FLJ32214	-0.170919	6.85976	-2.155	0.0387705	0.999544	-3.68872
LOC652587	0.163283	6.87938	2.15491	0.0387779	0.999544	-3.68883
PSCD4	-0.19133	9.15692	-2.15483	0.0387846	0.999544	-3.68893
KIAA1843	-0.179491	7.03143	-2.15411	0.0388457	0.999544	-3.68981
LYPD6	-0.147514	6.96236	-2.15383	0.0388697	0.999544	-3.69016
C6orf78	-0.140685	6.94948	-2.15289	0.0389489	0.999544	-3.69131
LOC283932	-0.137534	7.21698	-2.15134	0.0390812	0.999544	-3.69323
ABHD10	-0.157169	8.50774	-2.15079	0.0391276	0.999544	-3.6939
LOC642255	0.146097	8.1517	2.15059	0.0391449	0.999544	-3.69415
MGC26647	0.142095	6.81008	2.15049	0.0391534	0.999544	-3.69427
RCVRN	-0.135613	6.85837	-2.1503	0.0391701	0.999544	-3.69451
SLCO2B1	0.137276	7.02843	2.14993	0.0392011	0.999544	-3.69496
LMNB2	0.158441	10.7532	2.14963	0.0392274	0.999544	-3.69533
MIR200A	-0.160707	6.92506	-2.14949	0.0392388	0.999544	-3.6955
LOC644377	-0.159012	6.88752	-2.14948	0.03924	0.999544	-3.69551
ZFR2	-0.125217	7.01151	-2.14948	0.0392403	0.999544	-3.69552
MUSK	0.151235	6.88931	2.14857	0.0393175	0.999544	-3.69663
LOC441666	-0.122114	7.00889	-2.14797	0.0393691	0.999544	-3.69737
MIR539	0.138805	6.86622	2.14785	0.0393794	0.999544	-3.69752
GLT8D1	-0.135288	9.03394	-2.14723	0.0394329	0.999544	-3.69828
GIGYF2	-0.116492	7.11843	-2.14707	0.0394467	0.999544	-3.69848
ACTL7B	0.159835	6.95245	2.14648	0.0394972	0.999544	-3.6992
RRS1	0.157752	10.9281	2.14648	0.0394973	0.999544	-3.6992
KLF9	0.147834	8.47593	2.14622	0.0395195	0.999544	-3.69952
CEP152	-0.195886	7.80744	-2.14558	0.0395746	0.999544	-3.70031
LOC729324	-0.299875	12.8376	-2.14557	0.0395758	0.999544	-3.70032
LRRC36	-0.156007	6.85541	-2.14408	0.0397045	0.999544	-3.70215
SFRS5	0.198107	11.4937	2.14405	0.0397069	0.999544	-3.70219
SCG5	-0.116265	6.94634	-2.14352	0.0397521	0.999544	-3.70283
LOC729435	0.191827	7.04871	2.14276	0.0398186	0.999544	-3.70377
LOC647972	0.139582	6.86968	2.14219	0.0398681	0.999544	-3.70447
LOC650517	0.153299	7.12278	2.14032	0.0400302	0.999544	-3.70676
PDCD10	-0.149851	11.1886	-2.14025	0.0400359	0.999544	-3.70684
NEGR1	0.129812	6.7356	2.14002	0.040056	0.999544	-3.70713
CSTF2	0.151694	10.2205	2.13957	0.0400953	0.999544	-3.70768
LOC91661	-0.150181	6.90848	-2.13906	0.0401402	0.999544	-3.70831
RIPK3	-0.123534	7.64669	-2.139	0.0401449	0.999544	-3.70838
C10orf28	0.138824	8.11512	2.13887	0.0401564	0.999544	-3.70854
LOC731878	0.144197	9.34663	2.13757	0.0402703	0.999544	-3.71014
PSG7	0.126727	6.90634	2.13748	0.0402777	0.999544	-3.71024
LOC653971	0.139098	6.86139	2.13728	0.0402956	0.999544	-3.71049
USP12	0.154754	7.1112	2.13702	0.0403185	0.999544	-3.71081
AARS2	-0.178944	9.51043	-2.13694	0.0403255	0.999544	-3.71091
HNRNPAB	0.126882	12.9946	2.13678	0.0403393	0.999544	-3.7111
LOC650405	0.143419	6.9219	2.13653	0.0403615	0.999544	-3.71141
ROCK2	-0.270379	13.2179	-2.1364	0.0403723	0.999544	-3.71156
AIM1	-0.139792	7.87228	-2.13631	0.0403808	0.999544	-3.71168
APOA1	0.150747	7.05573	2.13594	0.0404127	0.999544	-3.71213
MIR520H	-0.143582	6.78927	-2.13523	0.0404754	0.999544	-3.713
C21orf94	-0.137138	6.87238	-2.13506	0.0404906	0.999544	-3.71321
ARMET	-0.231139	12.6354	-2.13501	0.040495	0.999544	-3.71327
LOC132241	-0.150454	7.51365	-2.13461	0.0405303	0.999544	-3.71376
MIR296	0.145652	6.84961	2.13416	0.0405693	0.999544	-3.71431
HNRNPM	0.131485	12.4297	2.13407	0.0405773	0.999544	-3.71442
COQ5	-0.128994	10.8517	-2.13287	0.0406835	0.999544	-3.71589
CDO1	-0.129174	7.14499	-2.13223	0.04074	0.999544	-3.71667
FLJ46380	-0.164543	6.89879	-2.13145	0.0408093	0.999544	-3.71763
PPP1R1B	-0.138903	7.33645	-2.13123	0.0408285	0.999544	-3.7179
GAS6	0.169603	11.3955	2.1308	0.0408668	0.999544	-3.71843
LILRP2	0.166445	6.88946	2.1306	0.0408838	0.999544	-3.71866
CDC2	-0.158818	10.7914	-2.12987	0.0409486	0.999544	-3.71955
LOC100130053	-0.260701	7.90692	-2.12976	0.040959	0.999544	-3.7197
GPER	-0.136232	7.11493	-2.12926	0.0410033	0.999544	-3.72031
LOC339746	0.1462	6.92749	2.12925	0.0410041	0.999544	-3.72032
OR2A5	0.152966	6.90839	2.12875	0.0410482	0.999544	-3.72092
LOC643406	-0.151214	6.91693	-2.1285	0.0410706	0.999544	-3.72123
LOC100131756	0.151397	6.92101	2.12821	0.041097	0.999544	-3.72159
LOC729675	-0.124857	6.94776	-2.12745	0.0411646	0.999544	-3.72252
C14orf45	-0.137636	7.01742	-2.1269	0.0412139	0.999544	-3.72319
FLJ20021	-0.17208	7.62496	-2.12674	0.0412276	0.999544	-3.72338
TIGD7	-0.126281	6.88841	-2.12673	0.0412288	0.999544	-3.7234
LOC401720	0.139684	6.9211	2.12546	0.0413427	0.999544	-3.72495
GPR75	0.144422	6.90322	2.12505	0.0413788	0.999544	-3.72544
SSPN	-0.140737	6.77275	-2.12488	0.0413946	0.999544	-3.72566
LOC348021	-0.185931	6.9809	-2.12478	0.0414032	0.999544	-3.72577
MAML1	0.1498	7.23214	2.12463	0.0414166	0.999544	-3.72596
VEZT	-0.189885	8.33263	-2.12436	0.0414411	0.999544	-3.72629
SPAG4	-0.118705	6.9669	-2.12433	0.0414441	0.999544	-3.72633
POLR3K	0.145178	10.135	2.12421	0.0414548	0.999544	-3.72648
MED4	-0.122619	9.90364	-2.12354	0.0415146	0.999544	-3.72729
PIWIL1	-0.183935	6.84974	-2.12328	0.0415376	0.999544	-3.7276
PRSS27	-0.129158	6.7318	-2.12305	0.0415586	0.999544	-3.72789
HNRNPF	0.159252	8.32188	2.12303	0.0415609	0.999544	-3.72792
GOLGA9P	-0.209882	7.46388	-2.12301	0.0415621	0.999544	-3.72793
LOC652175	-0.16249	7.22584	-2.12298	0.0415653	0.999544	-3.72798
TP53BP2	0.164026	9.07526	2.12258	0.0416006	0.999544	-3.72845
LOC644350	0.11956	6.96437	2.12172	0.0416789	0.999544	-3.72951
AHDC1	-0.142801	6.89761	-2.1216	0.041689	0.999544	-3.72965
SNORA70B	0.127562	7.06372	2.12093	0.0417501	0.999544	-3.73048
LOC441097	0.159602	6.88181	2.12087	0.0417557	0.999544	-3.73055
LOC100128361	0.132292	7.0443	2.12008	0.0418266	0.999544	-3.73151
C4orf32	0.148462	8.28453	2.1199	0.0418434	0.999544	-3.73173
P2RX1	0.174779	7.98616	2.11964	0.0418669	0.999544	-3.73205
FDX1L	0.161143	8.70635	2.11955	0.041875	0.999544	-3.73216
VASN	0.190815	6.91197	2.11953	0.0418763	0.999544	-3.73218
DNAI1	-0.149824	6.95649	-2.11938	0.0418899	0.999544	-3.73236
DNHL1	0.128941	6.99146	2.11926	0.0419013	0.999544	-3.73251
IFT140	0.14427	6.88941	2.11918	0.0419083	0.999544	-3.73261
DMPK	-0.115641	6.84901	-2.11838	0.041981	0.999544	-3.73358
TDRD1	-0.135166	7.22333	-2.11834	0.0419849	0.999544	-3.73363
SNORA21	-0.145294	7.03973	-2.11776	0.0420375	0.999544	-3.73434
WIPI1	-0.142847	7.03909	-2.11694	0.0421114	0.999544	-3.73533
ALCAM	0.188051	9.33647	2.11686	0.0421191	0.999544	-3.73543
MT4	-0.149297	6.93602	-2.11686	0.0421194	0.999544	-3.73544
XKRY2	0.112216	6.80873	2.11682	0.0421228	0.999544	-3.73548
GIN1	-0.125643	7.31674	-2.11622	0.0421773	0.999544	-3.73621
C4orf11	-0.1387	7.02368	-2.11289	0.0424823	0.999544	-3.74027
SLC25A46	0.145279	9.69484	2.11281	0.0424888	0.999544	-3.74035
KCNIP4	0.129972	7.10016	2.11262	0.0425064	0.999544	-3.74059
LOC341457	-0.13631	14.9852	-2.11234	0.0425326	0.999544	-3.74093
CRYBB2	0.16433	7.40826	2.11197	0.0425665	0.999544	-3.74138
ULK1	-0.206837	9.34085	-2.11186	0.0425766	0.999544	-3.74152
GPR21	-0.120088	6.94505	-2.11127	0.0426306	0.999544	-3.74223
NSMCE2	-0.149906	9.91263	-2.11125	0.0426325	0.999544	-3.74225
PPFIBP2	-0.157155	7.89393	-2.11122	0.0426358	0.999544	-3.7423
C5orf15	-0.125229	10.9584	-2.11103	0.0426526	0.999544	-3.74252
SS18	0.223833	8.92896	2.11029	0.0427211	0.999544	-3.74342
LPAR1	0.141697	7.55123	2.11026	0.0427234	0.999544	-3.74345
VRK1	0.184469	10.2831	2.1099	0.0427574	0.999544	-3.7439
EIF4ENIF1	0.145546	8.25889	2.10972	0.0427736	0.999544	-3.74411
PADI2	-0.150186	7.11002	-2.10929	0.0428137	0.999544	-3.74464
LOC440040	0.126168	6.9756	2.10847	0.0428891	0.999544	-3.74563
LOC728677	0.14507	6.88801	2.10835	0.0429002	0.999544	-3.74578
C14orf85	-0.280983	10.22	-2.10784	0.0429477	0.999544	-3.7464
USP32	0.147902	7.09863	2.10736	0.0429919	0.999544	-3.74698
LOC644544	0.130758	7.38177	2.10733	0.042995	0.999544	-3.74702
MIR27B	-0.151601	6.80912	-2.10715	0.0430116	0.999544	-3.74724
WNK3	-0.147669	7.17974	-2.10701	0.0430243	0.999544	-3.7474
PAGE5	-0.163407	6.95596	-2.10657	0.0430651	0.999544	-3.74794
RBX1	-0.13443	12.2027	-2.10627	0.043093	0.999544	-3.7483
NADSYN1	0.170824	8.77214	2.10613	0.0431066	0.999544	-3.74848
MICA	-0.124333	6.93637	-2.10603	0.0431159	0.999544	-3.7486
TUSC4	-0.14183	10.0918	-2.10479	0.0432305	0.999544	-3.75009
SLC35A5	-0.174247	9.57774	-2.10438	0.0432695	0.999544	-3.7506
SF3A1	0.146805	8.35999	2.10435	0.0432715	0.999544	-3.75063
GPR68	0.19856	7.71304	2.10431	0.0432756	0.999544	-3.75068
PNPT1	-0.351379	11.6633	-2.10414	0.0432912	0.999544	-3.75088
PCDHB6	0.142278	6.99345	2.10413	0.0432923	0.999544	-3.7509
RAX2	0.216227	7.00734	2.10367	0.0433357	0.999544	-3.75146
LOC653497	-0.152347	7.03605	-2.10363	0.0433395	0.999544	-3.75151
LOC100131686	-0.143703	7.09074	-2.10342	0.0433591	0.999544	-3.75176
LOC644574	-0.118395	6.91092	-2.10336	0.0433646	0.999544	-3.75184
LOC651481	-0.159704	6.93807	-2.10291	0.0434067	0.999544	-3.75238
LOC646882	0.146564	7.02338	2.10279	0.0434173	0.999544	-3.75252
DDX1	0.130727	11.9019	2.10046	0.0436359	0.999544	-3.75534
UBE2H	0.172819	7.89282	2.1004	0.0436416	0.999544	-3.75542
MIR340	0.146576	6.86457	2.10023	0.0436575	0.999544	-3.75562
FAM166A	0.125907	7.01645	2.10016	0.0436647	0.999544	-3.75572
STARD8	-0.137257	8.39028	-2.09987	0.0436915	0.999544	-3.75606
FAM9A	0.15942	6.89062	2.09985	0.0436936	0.999544	-3.75609
TP53AP1	-0.147999	7.23991	-2.09957	0.0437193	0.999544	-3.75642
NHEDC1	-0.142979	7.10377	-2.09933	0.0437425	0.999544	-3.75672
FLJ45337	-0.132696	7.02765	-2.09932	0.0437434	0.999544	-3.75673
SCGB3A2	0.156656	7.09687	2.09928	0.0437471	0.999544	-3.75678
LOC653242	-0.14878	7.24159	-2.09877	0.0437952	0.999544	-3.75739
ERCC3	-0.120369	8.33061	-2.09874	0.0437976	0.999544	-3.75743
ZNF14	-0.201643	10.0314	-2.0983	0.0438398	0.999544	-3.75797
C21orf56	0.148748	8.06759	2.09822	0.0438472	0.999544	-3.75806
KIAA1267	0.143813	9.57489	2.09821	0.0438478	0.999544	-3.75807
CEP68	0.152673	7.056	2.09717	0.0439466	0.999544	-3.75933
MIRLET7I	0.119665	6.85408	2.09706	0.043957	0.999544	-3.75947
LOC643997	-0.302507	10.3756	-2.09702	0.0439608	0.999544	-3.75952
MIR141	0.137432	6.88496	2.09693	0.0439688	0.999544	-3.75962
SNORD108	0.166311	6.92013	2.0969	0.0439717	0.999544	-3.75966
RARRES2	-0.19914	6.96748	-2.09646	0.044013	0.999544	-3.76018
ATP2C1	-0.180608	8.00394	-2.09513	0.0441399	0.999544	-3.7618
C2orf14	0.135564	6.85606	2.09478	0.0441726	0.999544	-3.76222
LOC389422	0.121862	6.91773	2.09438	0.0442106	0.999544	-3.7627
TRPV2	0.148403	8.31234	2.09379	0.0442666	0.999544	-3.76341
PRKCZ	-0.127159	7.52806	-2.09379	0.044267	0.999544	-3.76342
FLJ46010	-0.132424	6.98354	-2.09365	0.04428	0.999544	-3.76359
LOC729970	0.15512	7.00242	2.09364	0.0442808	0.999544	-3.76359
DNAL1	-0.147472	7.76644	-2.09338	0.0443058	0.999544	-3.76391
KLF1	-0.135576	6.98761	-2.09291	0.0443507	0.999544	-3.76448
ZDHHC13	-0.165374	7.95118	-2.09231	0.0444079	0.999544	-3.76521
KRT26	0.15384	6.89851	2.09196	0.044441	0.999544	-3.76563
MIR608	-0.129943	6.85424	-2.09193	0.044444	0.999544	-3.76566
KIAA1751	-0.29454	8.21846	-2.0917	0.0444664	0.999544	-3.76595
SRY	-0.136432	6.85693	-2.09137	0.0444974	0.999544	-3.76634
MOBKL2C	-0.189817	8.27699	-2.09111	0.0445227	0.999544	-3.76666
SNX7	0.173322	7.03782	2.09035	0.0445955	0.999544	-3.76758
RNGTT	-0.147682	10.5729	-2.08947	0.0446798	0.999544	-3.76864
LOC283953	-0.211255	7.85635	-2.08896	0.0447283	0.999544	-3.76925
SLC9A3R2	-0.153119	6.73747	-2.08855	0.0447675	0.999544	-3.76974
FAR2	0.166175	8.43312	2.08814	0.0448069	0.999544	-3.77023
DUOX1	-0.130444	7.05415	-2.08758	0.0448612	0.999544	-3.77092
ACTL7A	0.175204	6.77465	2.08745	0.0448734	0.999544	-3.77107
SIAH1	-0.110834	10.1146	-2.08732	0.0448859	0.999544	-3.77122
LOC652331	0.155384	6.92091	2.08689	0.0449274	0.999544	-3.77174
MIR555	-0.148768	6.84902	-2.08685	0.0449316	0.999544	-3.7718
LASS5	-0.170527	7.97158	-2.0866	0.0449558	0.999544	-3.7721
LOC729113	0.142396	6.96668	2.08603	0.0450107	0.999544	-3.77278
LOC642778	-0.157615	6.89188	-2.08594	0.0450194	0.999544	-3.77289
SFRS12	-0.149674	8.501	-2.08574	0.0450386	0.999544	-3.77313
ANG	-0.17209	7.75222	-2.08552	0.0450603	0.999544	-3.7734
MAPK4	-0.138074	7.11266	-2.08533	0.0450786	0.999544	-3.77363
FAM111A	-0.16442	11.0655	-2.08521	0.04509	0.999544	-3.77377
LOC649139	0.129654	7.01548	2.08485	0.0451244	0.999544	-3.7742
LOC729372	0.171617	7.06836	2.0846	0.0451486	0.999544	-3.7745
FAM73A	-0.224417	7.56471	-2.08424	0.0451841	0.999544	-3.77494
LOC100132705	0.1513	7.15956	2.08384	0.0452222	0.999544	-3.77542
FAM167A	0.134183	6.96891	2.08362	0.0452444	0.999544	-3.77569
HDAC2	0.13311	12.1549	2.08352	0.0452532	0.999544	-3.7758
LOC641810	-0.142022	6.86814	-2.0825	0.0453523	0.999544	-3.77703
FBXO40	0.151409	6.72385	2.08243	0.0453596	0.999544	-3.77712
MIR124-2	-0.143127	6.8632	-2.08193	0.0454085	0.999544	-3.77773
TMEM116	-0.133792	8.85428	-2.08177	0.0454239	0.999544	-3.77792
ARID4B	0.263222	8.42379	2.0815	0.0454499	0.999544	-3.77824
MGC33948	-0.138685	7.10674	-2.08046	0.0455516	0.999544	-3.7795
LOC646301	-0.153432	7.26254	-2.07983	0.0456131	0.999544	-3.78025
LOC389906	0.120797	6.92963	2.07979	0.0456169	0.999544	-3.7803
RARA	0.138998	9.33028	2.07947	0.0456485	0.999544	-3.78069
HIST2H2AB	-0.133896	6.95852	-2.07942	0.0456533	0.999544	-3.78075
LOC441114	0.145086	6.9397	2.07899	0.0456955	0.999544	-3.78127
LOC653680	-0.137885	6.91338	-2.07808	0.045784	0.999544	-3.78235
LOC730098	-0.15332	7.45308	-2.07777	0.0458143	0.999544	-3.78273
LOC286456	0.133323	6.99184	2.07758	0.0458328	0.999544	-3.78295
KRTAP13-1	0.129746	6.97248	2.07733	0.045858	0.999544	-3.78326
BEND3	0.177751	7.99922	2.07723	0.0458673	0.999544	-3.78337
EEFSEC	-0.1275	7.01976	-2.07709	0.0458811	0.999544	-3.78354
MAL	-0.133775	6.97838	-2.07665	0.0459244	0.999544	-3.78407
ARHGAP27	-0.179921	7.1113	-2.07664	0.0459254	0.999544	-3.78409
TMEM50B	-0.188692	10.6059	-2.07656	0.0459329	0.999544	-3.78418
SPG7	-0.165235	9.18403	-2.07566	0.0460224	0.999544	-3.78527
CPSF6	0.145882	7.54263	2.07485	0.0461019	0.999544	-3.78624
PRKRIR	0.127677	10.6228	2.07393	0.0461925	0.999544	-3.78734
AQP1	-0.118488	7.02343	-2.07389	0.0461961	0.999544	-3.78739
PLA2G2E	-0.128958	6.84262	-2.07348	0.0462368	0.999544	-3.78788
KRTAP2-2	0.131711	6.95426	2.0731	0.0462749	0.999544	-3.78834
PMM2	0.146043	9.39461	2.07273	0.0463118	0.999544	-3.78879
FNDC3B	0.147934	9.42331	2.07252	0.0463322	0.999544	-3.78904
LOC284685	-0.147734	6.82245	-2.07229	0.0463552	0.999544	-3.78932
C6orf111	-0.173585	8.33459	-2.07219	0.0463651	0.999544	-3.78944
LOC642165	-0.130102	6.96823	-2.07181	0.0464023	0.999544	-3.78989
LOC642938	-0.138685	6.90759	-2.07162	0.0464217	0.999544	-3.79012
LOC648852	-0.231324	7.43955	-2.07157	0.0464264	0.999544	-3.79018
LOC100130208	-0.122503	6.90518	-2.07123	0.0464604	0.999544	-3.79059
LOC642033	0.21862	8.28597	2.06953	0.046629	0.999544	-3.79262
ZNF345	-0.137336	7.01587	-2.06904	0.0466779	0.999544	-3.79321
LOC643821	-0.123787	6.88952	-2.06883	0.0466991	0.999544	-3.79347
LOC642897	-0.179229	8.53124	-2.06823	0.0467583	0.999544	-3.79418
SDC4	0.147049	7.80089	2.06809	0.0467728	0.999544	-3.79435
LOC650804	-0.133075	6.92477	-2.06713	0.0468687	0.999544	-3.7955
WDR67	-0.145621	9.2253	-2.06677	0.0469049	0.999544	-3.79593
GRM2	0.184574	7.24862	2.06673	0.0469091	0.999544	-3.79598
LOC100130938	0.142568	7.05658	2.06653	0.0469288	0.999544	-3.79622
PTBP1	0.157587	13.5867	2.06648	0.046934	0.999544	-3.79628
KRTAP1-3	-0.144681	6.77567	-2.0661	0.0469717	0.999544	-3.79673
LOC646029	0.125795	6.86678	2.06606	0.0469755	0.999544	-3.79678
C1QL4	0.136896	6.80392	2.06562	0.0470203	0.999544	-3.79731
LOC647015	-0.155289	6.87864	-2.06543	0.0470395	0.999544	-3.79754
LDHA	0.134077	13.9881	2.06541	0.0470416	0.999544	-3.79757
LOC654117	0.15133	7.00627	2.0654	0.047042	0.999544	-3.79757
PRAME	-0.128643	7.02815	-2.06529	0.0470532	0.999544	-3.7977
LOC649025	0.135546	6.99102	2.06519	0.0470634	0.999544	-3.79783
RHOV	-0.17817	6.82924	-2.06494	0.0470889	0.999544	-3.79813
ASB1	-0.153082	8.21365	-2.06416	0.0471673	0.999544	-3.79906
LOC650757	-0.15491	7.16583	-2.06401	0.0471822	0.999544	-3.79924
TBC1D3	-0.145359	6.87919	-2.064	0.0471833	0.999544	-3.79925
SNORA62	-0.135633	7.80823	-2.06388	0.0471951	0.999544	-3.79939
PTGER4	-0.216895	9.11799	-2.06378	0.0472051	0.999544	-3.79951
TRPS1	-0.225079	7.16524	-2.06356	0.0472277	0.999544	-3.79978
SERPINA1	0.129535	7.09979	2.06353	0.0472299	0.999544	-3.79981
LOC100132919	-0.103844	6.93379	-2.06298	0.0472853	0.999544	-3.80046
FANCG	-0.141589	8.92998	-2.06267	0.0473168	0.999544	-3.80084
C6orf118	0.132186	6.90472	2.06266	0.0473176	0.999544	-3.80085
HIF1AN	0.195314	8.20172	2.062	0.0473846	0.999544	-3.80164
RGS9	0.117156	6.79027	2.06197	0.0473877	0.999544	-3.80168
LOC389111	0.132447	6.96362	2.06164	0.0474209	0.999544	-3.80207
CAMLG	-0.14945	11.4301	-2.06147	0.047438	0.999544	-3.80227
BBX	0.175037	7.54827	2.05901	0.0476878	0.999544	-3.80522
DDX55	-0.140939	10.124	-2.05831	0.0477593	0.999544	-3.80606
LOC100128867	0.117265	6.80419	2.05821	0.0477693	0.999544	-3.80618
ARL16	-0.267732	9.69203	-2.05783	0.0478078	0.999544	-3.80663
UGT1A4	0.132168	6.8833	2.05779	0.0478122	0.999544	-3.80668
LOC645739	-0.122469	6.92109	-2.05712	0.0478801	0.999544	-3.80748
FEV	-0.153568	7.06906	-2.05711	0.0478809	0.999544	-3.80749
TMEM106A	-0.218989	7.5139	-2.05708	0.047884	0.999544	-3.80752
CYTH2	-0.130005	7.42775	-2.05546	0.0480497	0.999544	-3.80946
LOC100130010	-0.12694	6.92765	-2.05537	0.0480586	0.999544	-3.80956
LOC653436	-0.193838	7.00883	-2.05526	0.0480698	0.999544	-3.80969
HM13	0.159495	8.77688	2.05515	0.0480815	0.999544	-3.80983
PPP3R1	0.121582	9.65381	2.05507	0.0480899	0.999544	-3.80993
NFKBIL1	-0.183365	7.20334	-2.05504	0.0480924	0.999544	-3.80996
IL10	-0.291369	9.60416	-2.05493	0.0481037	0.999544	-3.81009
PLA2G3	-0.161889	6.76718	-2.05434	0.0481644	0.999544	-3.8108
PKD1P1	0.131311	6.93026	2.05427	0.048171	0.999544	-3.81087
SNORD102	0.140641	6.81779	2.05423	0.0481754	0.999544	-3.81092
RPH3AL	-0.150082	7.00624	-2.05416	0.0481824	0.999544	-3.811
LOC100130445	-0.270296	11.2652	-2.05413	0.048186	0.999544	-3.81105
LOC647521	-0.137014	7.03798	-2.05399	0.0482006	0.999544	-3.81122
HMCN1	0.145758	6.74052	2.05393	0.0482068	0.999544	-3.81129
SNORD61	0.130099	6.84606	2.05331	0.04827	0.999544	-3.81202
TBC1D10A	0.145063	7.15597	2.05325	0.048276	0.999544	-3.81209
LOC339742	-0.118557	7.06153	-2.05308	0.0482938	0.999544	-3.8123
SNORA65	-0.149344	7.3816	-2.0526	0.0483434	0.999544	-3.81287
LOC652460	0.156574	6.97767	2.05244	0.048359	0.999544	-3.81306
PPP1R14D	-0.139544	6.99369	-2.05235	0.0483686	0.999544	-3.81317
LOC100132713	-0.128191	6.952	-2.05193	0.0484117	0.999544	-3.81367
LOC650683	-0.123946	7.06331	-2.05178	0.0484275	0.999544	-3.81385
LOC100134330	0.154919	7.10509	2.05178	0.0484278	0.999544	-3.81385
LOC649910	-0.144951	6.97018	-2.05162	0.0484439	0.999544	-3.81404
RBL2	-0.147407	8.82114	-2.05133	0.0484741	0.999544	-3.81439
GJB1	0.127805	7.01438	2.05092	0.0485161	0.999544	-3.81487
PRR25	0.136883	6.91725	2.05058	0.0485506	0.999544	-3.81527
FAHD1	0.144079	10.1731	2.05047	0.0485619	0.999544	-3.8154
LOC644480	-0.147329	6.86395	-2.05028	0.0485821	0.999544	-3.81564
LOC643449	0.124216	6.98753	2.04988	0.0486238	0.999544	-3.81612
LOC100134201	-0.1323	6.98091	-2.04966	0.0486457	0.999544	-3.81637
ZBTB9	0.180548	9.10699	2.04938	0.048675	0.999544	-3.81671
MOGS	0.155664	7.73723	2.04938	0.0486755	0.999544	-3.81671
ART3	-0.13145	6.90813	-2.04903	0.0487117	0.999544	-3.81713
CATSPER2	-0.400121	8.95874	-2.049	0.0487142	0.999544	-3.81716
FBXL14	0.159125	6.97303	2.04882	0.0487332	0.999544	-3.81738
LOC649389	0.135998	6.95232	2.04845	0.0487713	0.999544	-3.81781
CHMP1A	0.157413	8.86767	2.04832	0.0487846	0.999544	-3.81797
MAPK8IP1	-0.127676	6.78406	-2.04827	0.0487896	0.999544	-3.81802
GGT5	-0.188073	6.98185	-2.04797	0.0488216	0.999544	-3.81839
SEMA6B	0.156991	7.3684	2.04757	0.048863	0.999544	-3.81887
AGXT	0.127258	6.94831	2.04738	0.0488819	0.999544	-3.81908
RBM12	0.182767	9.35297	2.04696	0.0489255	0.999544	-3.81958
FAM87B	-0.120974	6.90472	-2.04663	0.0489606	0.999544	-3.81998
TARBP2	-0.168316	8.9158	-2.04641	0.0489832	0.999544	-3.82024
LOC100134081	0.162306	6.96186	2.04636	0.0489886	0.999544	-3.8203
ANXA2P2	-0.186065	14.1481	-2.04608	0.049018	0.999544	-3.82064
KIAA0692	0.138011	7.21654	2.04583	0.0490435	0.999544	-3.82093
LOC649417	-0.156093	7.04203	-2.04571	0.0490565	0.999544	-3.82108
SNORA76	-0.162021	7.85015	-2.045	0.0491306	0.999544	-3.82193
NR4A1	-0.14754	7.07698	-2.04485	0.0491462	0.999544	-3.8221
LOC650155	0.133564	7.08649	2.04474	0.049157	0.999544	-3.82223
LOC100129291	0.130816	6.92822	2.04453	0.0491787	0.999544	-3.82247
OR52E6	0.116301	6.95344	2.04394	0.0492407	0.999544	-3.82318
C16orf50	0.149486	6.96297	2.04387	0.049248	0.999544	-3.82326
TMC8	-0.189617	7.2442	-2.0435	0.0492869	0.999544	-3.82371
LOC100130086	-0.141497	7.19558	-2.04334	0.0493038	0.999544	-3.8239
RASEF	-0.141575	6.95064	-2.04298	0.0493408	0.999544	-3.82432
ZNF227	0.137989	8.00647	2.04214	0.0494294	0.999544	-3.82532
DIO2	0.119933	7.00824	2.04184	0.0494612	0.999544	-3.82568
SHB	-0.14448	7.25662	-2.04178	0.0494669	0.999544	-3.82575
UNC119B	-0.163083	7.51912	-2.04104	0.0495443	0.999544	-3.82662
TCTEX1D4	-0.124696	6.99562	-2.04095	0.0495544	0.999544	-3.82674
LOC283999	0.142339	7.13511	2.04075	0.0495751	0.999544	-3.82697
ANKRD1	0.146462	6.9532	2.04066	0.0495846	0.999544	-3.82708
OR5AC2	-0.129799	6.71598	-2.04053	0.0495983	0.999544	-3.82723
LOC653197	0.169755	6.96783	2.04044	0.0496074	0.999544	-3.82733
FFAR3	-0.135348	6.91349	-2.04029	0.0496236	0.999544	-3.82752
C1orf26	-0.131543	7.23225	-2.03991	0.0496637	0.999544	-3.82797
CLN8	-0.161045	7.60045	-2.03955	0.0497014	0.999544	-3.8284
FLJ25037	0.138587	6.99396	2.03947	0.0497103	0.999544	-3.8285
DSCAML1	0.180089	6.88468	2.03895	0.0497643	0.999544	-3.8291
LARP1	0.244947	8.80123	2.03871	0.0497905	0.999544	-3.8294
LOC653520	-0.145113	6.99682	-2.03857	0.0498045	0.999544	-3.82956
GALNTL5	-0.131759	6.86309	-2.0385	0.0498127	0.999544	-3.82965
MTRF1	-0.145019	8.24887	-2.03846	0.0498169	0.999544	-3.82969
PRKCQ	0.162006	7.34726	2.0384	0.0498228	0.999544	-3.82976
LOC100128090	-0.147014	7.03455	-2.03765	0.0499019	0.999544	-3.83065
WDR82	0.227274	9.42337	2.0376	0.0499071	0.999544	-3.83071
KL	-0.153725	6.91527	-2.03725	0.0499448	0.999544	-3.83113
ARHGEF7	-0.126415	9.57206	-2.03697	0.0499739	0.999544	-3.83146
APBA3	-0.133106	8.14395	-2.03685	0.0499863	0.999544	-3.8316
GTF2H2B	-0.1777	9.58795	-2.03666	0.0500067	0.999544	-3.83182
LOC202227	0.1798	7.69432	2.036	0.0500767	0.999544	-3.83261
DDIT3	0.158814	7.75505	2.0357	0.0501082	0.999544	-3.83296
DGKE	0.125629	7.18808	2.0354	0.050141	0.999544	-3.83333
CYP3A7	-0.124848	6.8316	-2.03504	0.0501791	0.999544	-3.83375
LOC440992	-0.123429	6.86497	-2.03476	0.0502083	0.999544	-3.83408
LOC399898	0.142297	6.7929	2.03469	0.0502162	0.999544	-3.83417
PIP5K2B	-0.269322	8.75579	-2.03423	0.0502648	0.999544	-3.83471
RG9MTD2	-0.139339	7.63992	-2.03414	0.0502743	0.999544	-3.83481
LOC652846	-0.135654	6.96349	-2.03362	0.0503299	0.999544	-3.83543
LEO1	0.184631	9.55194	2.03361	0.0503305	0.999544	-3.83544
ZBTB1	-0.16224	6.93369	-2.03357	0.0503356	0.999544	-3.83549
LOC649282	-0.116023	7.06894	-2.03355	0.0503376	0.999544	-3.83552
ZSCAN22	0.123483	7.13417	2.03344	0.0503494	0.999544	-3.83565
SLC35F2	0.125935	10.2577	2.03335	0.0503591	0.999544	-3.83575
ASB4	-0.136545	7.05539	-2.03246	0.0504537	0.999544	-3.83681
LOC653489	-0.312016	8.98366	-2.03228	0.050473	0.999544	-3.83702
LOC100130361	-0.164203	7.02477	-2.03206	0.0504961	0.999544	-3.83728
LOC642936	0.128569	6.9405	2.03199	0.0505039	0.999544	-3.83736
LOC650214	-0.152973	6.84261	-2.03191	0.0505118	0.999544	-3.83745
NFE2L3	0.142127	7.86913	2.0319	0.0505138	0.999544	-3.83747
LOC729459	-0.159265	6.91755	-2.0318	0.0505245	0.999544	-3.83759
LOC648704	0.133916	6.87611	2.03175	0.0505297	0.999544	-3.83765
SCARNA22	0.151103	7.20369	2.0317	0.0505349	0.999544	-3.83771
LOC650677	0.121294	7.07278	2.03161	0.0505448	0.999544	-3.83782
C3orf52	-0.144046	6.96562	-2.03137	0.0505705	0.999544	-3.8381
OR1D2	-0.11417	6.84302	-2.0312	0.0505881	0.999544	-3.83829
LZTS2	-0.111532	7.15606	-2.03119	0.0505893	0.999544	-3.83831
ST14	0.17312	7.69565	2.03109	0.0506004	0.999544	-3.83843
LOC644813	-0.139015	6.88368	-2.03095	0.0506153	0.999544	-3.8386
APBA1	-0.164617	6.97051	-2.03081	0.0506297	0.999544	-3.83875
LOC100133362	-0.121681	6.85937	-2.03074	0.0506373	0.999544	-3.83884
HHEX	-0.131953	9.14365	-2.03066	0.0506459	0.999544	-3.83893
LOC100131649	-0.147292	6.97075	-2.03023	0.0506922	0.999544	-3.83945
NEURL	0.120076	6.82511	2.03015	0.0507004	0.999544	-3.83954
LOC642093	0.136174	6.84029	2.02898	0.0508268	0.999544	-3.84093
CNIH4	-0.199766	12.5538	-2.02883	0.0508429	0.999544	-3.84111
AUH	-0.140767	7.95329	-2.02883	0.050843	0.999544	-3.84111
SLC48A1	-0.177432	8.48229	-2.02823	0.0509067	0.999544	-3.84181
RFWD2	-0.116183	10.8614	-2.02788	0.0509449	0.999544	-3.84223
FAM151B	-0.169487	7.05336	-2.02779	0.0509548	0.999544	-3.84234
OR3A3	0.162828	6.96493	2.02761	0.0509733	0.999544	-3.84254
LOC644116	-0.199469	7.13963	-2.02738	0.0509985	0.999544	-3.84282
OPHN1	0.136435	6.9516	2.02697	0.0510432	0.999544	-3.84331
COX8C	0.126279	6.81361	2.02634	0.051111	0.999544	-3.84405
SLC30A5	0.123812	9.99503	2.0261	0.0511371	0.999544	-3.84433
LOC728162	-0.128159	6.94354	-2.02586	0.0511622	0.999544	-3.84461
LOC646034	-0.167188	7.46473	-2.02555	0.0511956	0.999544	-3.84497
LOC642834	-0.149991	6.84321	-2.02508	0.0512474	0.999544	-3.84554
CDK5R2	-0.158459	7.24723	-2.02445	0.0513157	0.999544	-3.84628
LOC440422	-0.121598	7.0229	-2.02379	0.0513868	0.999544	-3.84706
SNORD113-4	0.140709	7.01294	2.02372	0.0513938	0.999544	-3.84713
LOC100130345	0.117879	6.96891	2.02342	0.0514265	0.999544	-3.84749
RPL18A	0.118201	14.8096	2.02316	0.0514552	0.999544	-3.8478
C1orf89	-0.116098	7.04507	-2.02294	0.0514794	0.999544	-3.84806
CX3CL1	0.15502	6.89354	2.02279	0.0514958	0.999544	-3.84824
COX7A1	0.134202	6.75717	2.0227	0.0515054	0.999544	-3.84835
SH3GLB2	0.133691	8.83603	2.0226	0.0515158	0.999544	-3.84846
C18orf2	-0.120748	7.12731	-2.02243	0.0515349	0.999544	-3.84867
NMD3	-0.126288	10.2009	-2.02219	0.0515602	0.999544	-3.84894
EWSR1	0.131442	11.569	2.02219	0.0515602	0.999544	-3.84894
C11orf84	0.167125	7.19737	2.02212	0.0515679	0.999544	-3.84903
LRMP	-0.163575	9.21152	-2.02168	0.0516161	0.999544	-3.84955
LOC649948	-0.136053	6.87326	-2.02161	0.0516235	0.999544	-3.84963
MCEE	-0.112596	9.20887	-2.02135	0.0516527	0.999544	-3.84994
RUNDC3A	-0.131502	6.76715	-2.02127	0.0516612	0.999544	-3.85004
LOC651898	-0.12373	6.98304	-2.0212	0.0516688	0.999544	-3.85012
WIT1	0.155308	7.51253	2.02093	0.0516981	0.999544	-3.85044
APEH	0.141365	11.064	2.02086	0.0517056	0.999544	-3.85052
LOC644124	-0.186441	7.39232	-2.0197	0.0518319	0.999544	-3.85188
LOC730479	-0.118171	6.94473	-2.01954	0.0518503	0.999544	-3.85208
LOC729090	-0.371804	11.4071	-2.01951	0.0518531	0.999544	-3.85211
ELP2	-0.109775	9.63673	-2.01946	0.0518584	0.999544	-3.85217
EID2B	-0.282895	9.67686	-2.01871	0.0519402	0.999544	-3.85305
LOC100127989	-0.112148	6.99237	-2.01864	0.0519486	0.999544	-3.85314
UCHL5	0.175299	10.6604	2.01799	0.0520194	0.999544	-3.8539
LOC650695	0.132519	6.83056	2.01783	0.0520371	0.999544	-3.85409
FAM19A1	0.145887	6.70104	2.01746	0.0520781	0.999544	-3.85453
WBP11P1	0.124247	7.0983	2.01738	0.0520863	0.999544	-3.85462
LOC644133	0.129398	6.90728	2.01674	0.052157	0.999544	-3.85538
CHST6	0.133815	6.84424	2.01656	0.0521766	0.999544	-3.85559
FOXO4	0.153829	9.10611	2.0162	0.0522161	0.999544	-3.85601
ITIH5	-0.24639	13.4898	-2.01614	0.0522224	0.999544	-3.85608
ERCC-00104	-0.142703	6.77533	-2.01612	0.0522245	0.999544	-3.8561
MUM1	-0.148448	9.21693	-2.01577	0.0522636	0.999544	-3.85652
LOC652491	0.14292	6.98186	2.0157	0.0522713	0.999544	-3.8566
OPN5	-0.141959	7.13585	-2.01524	0.0523223	0.999544	-3.85714
MIR640	-0.147268	6.86982	-2.0148	0.0523702	0.999544	-3.85766
NLGN2	0.145888	7.05072	2.01472	0.0523788	0.999544	-3.85775
SDCCAG3	-0.164086	9.48748	-2.01469	0.0523823	0.999544	-3.85779
OR11A1	-0.122542	7.00755	-2.0144	0.0524141	0.999544	-3.85812
UTX	0.147647	7.68	2.01432	0.0524232	0.999544	-3.85822
LOC650831	-0.123718	6.9627	-2.01427	0.0524286	0.999544	-3.85828
DAZL	-0.115838	6.97093	-2.01422	0.0524348	0.999544	-3.85834
C9orf53	-0.145842	6.98334	-2.01364	0.052498	0.999544	-3.85902
LOC100132784	0.16763	7.09653	2.01358	0.0525052	0.999544	-3.8591
CAMK2B	0.122016	7.10986	2.01348	0.0525166	0.999544	-3.85922
HCG18	0.127058	7.1702	2.01258	0.052616	0.999544	-3.86027
UGT1A9	-0.156186	7.00598	-2.01248	0.0526267	0.999544	-3.86039
HTR6	0.130295	6.89561	2.01246	0.0526294	0.999544	-3.86041
PAK6	0.122039	6.97233	2.01236	0.0526407	0.999544	-3.86054
LOC647955	0.136139	6.99366	2.01223	0.0526543	0.999544	-3.86068
P2RY6	0.163957	8.8252	2.01211	0.0526677	0.999544	-3.86082
LAMB4	-0.1368	6.8353	-2.01211	0.0526683	0.999544	-3.86083
ALKBH1	0.147974	8.51335	2.012	0.0526797	0.999544	-3.86095
EGR2	0.141949	7.05061	2.01181	0.0527008	0.999544	-3.86117
LOC728554	-0.168939	12.2238	-2.01165	0.0527191	0.999544	-3.86137
KLF16	-0.141583	6.87001	-2.0115	0.0527361	0.999544	-3.86155
MZF1	-0.156896	8.54805	-2.01102	0.0527888	0.999544	-3.8621
LOC642888	-0.143537	6.90041	-2.01101	0.0527903	0.999544	-3.86212
NECAB3	0.112912	7.03457	2.01096	0.0527954	0.999544	-3.86217
NOTCH2NL	0.15507	7.42959	2.01087	0.0528053	0.999544	-3.86228
AHCTF1	0.120466	8.91574	2.01076	0.0528173	0.999544	-3.86241
CPEB3	0.121428	7.3617	2.01046	0.0528513	0.999544	-3.86277
CARD8	-0.133493	8.88339	-2.01026	0.0528731	0.999544	-3.863
MRGPRG	0.144967	6.91999	2.0101	0.0528914	0.999544	-3.86319
PHF21A	-0.172034	9.46813	-2.00916	0.0529958	0.999544	-3.86429
C10orf131	-0.112391	6.91622	-2.00812	0.0531118	0.999544	-3.86551
AKAP10	-0.157991	7.35697	-2.00804	0.0531212	0.999544	-3.86561
ZNF276	-0.126537	7.14493	-2.00721	0.0532137	0.999544	-3.86658
LOC100130168	-0.273859	11.0073	-2.00713	0.053223	0.999544	-3.86668
PDE4DIP	0.122988	7.07724	2.00618	0.0533286	0.999544	-3.86779
JAKMIP1	-0.144524	6.87963	-2.00614	0.053333	0.999544	-3.86783
LINCR	0.126279	6.90425	2.0061	0.0533382	0.999544	-3.86789
EIF4H	0.126663	11.5336	2.0061	0.0533382	0.999544	-3.86789
TCEAL8	-0.182319	8.23225	-2.00517	0.053442	0.999544	-3.86897
LOC400721	-0.241631	12.1543	-2.00494	0.0534686	0.999544	-3.86925
TMEM42	-0.144622	9.07106	-2.00477	0.0534873	0.999544	-3.86945
LACTB2	-0.139057	10.2573	-2.00472	0.0534924	0.999544	-3.8695
C11orf51	0.168386	8.53188	2.00445	0.0535231	0.999544	-3.86982
PCDHA9	-0.129432	7.07398	-2.00432	0.0535381	0.999544	-3.86998
LOC100128083	-0.164718	7.07131	-2.00359	0.0536201	0.999544	-3.87083
MIR567	-0.135364	6.80173	-2.00273	0.0537169	0.999544	-3.87184
LOC652789	0.139553	7.05403	2.00269	0.0537213	0.999544	-3.87188
SNORD96B	-0.17428	7.166	-2.00259	0.0537325	0.999544	-3.872
SERPINA12	0.119102	6.7646	2.00221	0.0537751	0.999544	-3.87244
ASF1B	-0.202377	9.6752	-2.00221	0.0537755	0.999544	-3.87245
HS3ST1	0.145216	7.09695	2.0022	0.0537773	0.999544	-3.87247
PDPN	-0.130229	6.94486	-2.00213	0.0537847	0.999544	-3.87254
RAPH1	-0.12185	6.99784	-2.00162	0.0538418	0.999544	-3.87314
MND1	-0.142358	9.76151	-2.00145	0.0538613	0.999544	-3.87334
FOXD4L4	-0.124899	6.97777	-2.00139	0.0538685	0.999544	-3.87341
LOC100129624	-0.137335	6.88538	-2.00112	0.0538983	0.999544	-3.87372
DKFZp434M131	0.132333	7.10702	2.00111	0.0538995	0.999544	-3.87373
LOC440225	0.138018	7.08131	2.0011	0.0539006	0.999544	-3.87374
LOC728081	-0.148712	7.08365	-2.00069	0.0539472	0.999544	-3.87423
FBXL3	0.168524	8.21277	2.00049	0.0539703	0.999544	-3.87447
ZNF554	-0.159455	6.8599	-2.00025	0.0539971	0.999544	-3.87474
FAM129C	-0.116008	6.98314	-2.00025	0.0539975	0.999544	-3.87475
KIAA1737	0.1351	9.00816	2.00022	0.054001	0.999544	-3.87478
TMEM51	0.142069	7.0974	1.99975	0.0540539	0.999544	-3.87533
LOC652377	-0.140065	7.09977	-1.99924	0.0541115	0.999544	-3.87592
OR4D10	-0.1291	7.06308	-1.99893	0.054147	0.999544	-3.87629
C1orf144	-0.12421	9.94404	-1.99879	0.0541633	0.999544	-3.87646
ICOS	0.158958	7.09259	1.99864	0.0541795	0.999544	-3.87663
PLEKHG7	-0.141878	7.00718	-1.99854	0.0541915	0.999544	-3.87675
ZC3H11B	-0.15741	9.39331	-1.99851	0.054195	0.999544	-3.87679
LOC645895	-0.292713	12.1759	-1.9981	0.0542409	0.999544	-3.87726
ITGB1BP3	0.131317	6.99157	1.99769	0.0542878	0.999544	-3.87774
PLAC8L1	-0.135771	6.84909	-1.99751	0.0543091	0.999544	-3.87796
DCLRE1A	-0.137697	8.24786	-1.99708	0.0543579	0.999544	-3.87846
LOC440864	-0.106978	6.85091	-1.9968	0.0543894	0.999544	-3.87878
SLC44A4	-0.304633	11.6577	-1.99647	0.0544276	0.999544	-3.87917
LOC643879	0.153467	6.94425	1.99617	0.0544612	0.999544	-3.87952
LOC649593	0.151032	6.86965	1.99593	0.0544886	0.999544	-3.8798
LOC651610	0.143308	6.98905	1.99574	0.05451	0.999544	-3.88002
SNRP70	-0.139174	6.85976	-1.99554	0.0545328	0.999544	-3.88025
NFKBIB	0.132448	8.18306	1.99538	0.0545514	0.999544	-3.88044
LOC729809	0.133164	6.83776	1.99511	0.0545828	0.999544	-3.88076
HAPLN3	0.120413	6.73675	1.99463	0.0546378	0.999544	-3.88133
LOC346887	-0.157802	7.77294	-1.99418	0.0546886	0.999544	-3.88184
FKBP14	-0.235348	8.35182	-1.99393	0.0547179	0.999544	-3.88214
TOMM70A	0.136872	10.459	1.99387	0.0547239	0.999544	-3.8822
LOC644341	-0.169996	6.88709	-1.99381	0.0547309	0.999544	-3.88228
LOC387876	0.127911	6.88596	1.9938	0.0547328	0.999544	-3.8823
GANC	-0.116968	6.87674	-1.99331	0.054789	0.999544	-3.88287
KRTAP8-1	-0.13522	6.81262	-1.99326	0.0547949	0.999544	-3.88293
C21orf55	-0.277391	11.434	-1.99312	0.0548109	0.999544	-3.88309
LOC401354	0.113176	6.97422	1.99253	0.0548782	0.999544	-3.88377
AMDHD2	0.190451	7.42403	1.99235	0.0548993	0.999544	-3.88399
BCL2L10	-0.126414	6.89686	-1.99178	0.0549649	0.999544	-3.88466
LOC100131984	-0.112637	6.85894	-1.99114	0.0550386	0.999544	-3.8854
MEF2B	-0.154985	7.06129	-1.99098	0.0550568	0.999544	-3.88559
LOC652699	-0.138448	7.11059	-1.9906	0.0551009	0.999544	-3.88603
LOC100132848	-0.125647	6.98061	-1.99059	0.0551015	0.999544	-3.88604
GNAT2	0.117058	6.8485	1.99053	0.0551083	0.999544	-3.88611
DRGX	-0.142298	6.99887	-1.99015	0.0551523	0.999544	-3.88655
DRAM1	-0.141022	8.27375	-1.98975	0.0551985	0.999544	-3.88702
LOC653160	0.132256	7.10062	1.98967	0.0552082	0.999544	-3.88712
ABTB1	-0.25269	7.84788	-1.98955	0.0552215	0.999544	-3.88725
LOC645508	0.127893	6.974	1.9891	0.0552736	0.999544	-3.88778
SNORA26	-0.166648	7.45974	-1.98886	0.0553011	0.999544	-3.88806
SPATA5L1	0.169549	9.12757	1.98869	0.0553208	0.999544	-3.88825
C3orf41	0.1366	6.94783	1.98862	0.0553291	0.999544	-3.88834
PLA2G2F	0.143902	7.00598	1.98815	0.0553839	0.999544	-3.88889
ZNF780A	-0.113306	6.81164	-1.98809	0.0553911	0.999544	-3.88896
LOC442251	0.124263	6.87778	1.98804	0.0553963	0.999544	-3.88902
DSCR5	-0.137485	7.069	-1.988	0.0554008	0.999544	-3.88906
ZNF492	-0.123361	7.66002	-1.98786	0.0554168	0.999544	-3.88922
LOC100131767	-0.126073	7.02877	-1.98742	0.055468	0.999544	-3.88974
RNF146	-0.168465	8.74389	-1.98716	0.0554985	0.999544	-3.89004
LOC100129660	0.121363	7.1553	1.98642	0.0555844	0.999544	-3.89091
LOC100132411	-0.11801	6.87693	-1.98623	0.0556065	0.999544	-3.89113
LOC644363	0.136268	9.9715	1.98597	0.0556369	0.999544	-3.89143
LOC730183	0.156513	7.32432	1.98508	0.0557399	0.999544	-3.89246
MLL3	-0.126247	7.22584	-1.98422	0.0558402	0.999544	-3.89347
LOC644257	0.155964	6.95854	1.98379	0.055891	0.999544	-3.89397
LOC652618	0.164505	6.95751	1.98371	0.0559002	0.999544	-3.89406
LOC728519	-0.13685	7.26019	-1.98353	0.0559213	0.999544	-3.89427
SAP30BP	-0.116857	7.43865	-1.98342	0.0559345	0.999544	-3.89441
SPRY2	-0.13528	9.03746	-1.98336	0.0559406	0.999544	-3.89447
SNORA74A	-0.121875	6.92314	-1.98326	0.0559523	0.999544	-3.89458
ITGAL	0.128429	9.99525	1.98292	0.0559925	0.999544	-3.89498
LOC646310	-0.138097	6.95687	-1.98243	0.0560493	0.999544	-3.89555
LOC652322	0.168018	7.1068	1.98239	0.0560545	0.999544	-3.8956
FAM117B	0.162695	9.64252	1.98201	0.0560991	0.999544	-3.89604
LOC729978	-0.189128	9.91391	-1.98184	0.0561189	0.999544	-3.89624
SEC61B	0.123267	12.5155	1.98152	0.0561559	0.999544	-3.89661
C18orf8	0.12259	9.0444	1.98063	0.0562609	0.999544	-3.89765
LOC650744	-0.131773	6.89024	-1.97923	0.0564254	0.999544	-3.89928
LOC642757	0.141868	6.93385	1.97912	0.0564388	0.999544	-3.89941
CNO	0.137366	9.57819	1.97901	0.056451	0.999544	-3.89953
RAB23	-0.118069	9.3741	-1.97889	0.0564661	0.999544	-3.89968
FLJ39827	0.146684	8.32741	1.97888	0.0564667	0.999544	-3.89968
LOC439914	0.142652	7.03934	1.97883	0.056472	0.999544	-3.89974
KRT13	0.132501	6.78575	1.97879	0.0564777	0.999544	-3.89979
HEXIM2	-0.122405	7.2329	-1.97747	0.0566333	0.999544	-3.90132
MIR1265	-0.146002	7.03743	-1.97736	0.0566466	0.999544	-3.90145
LOC728707	-0.125813	6.82152	-1.97687	0.0567042	0.999544	-3.90202
SPRR4	-0.131238	6.99232	-1.97636	0.0567649	0.999544	-3.90262
LOC441920	0.150933	6.99026	1.97598	0.0568094	0.999544	-3.90305
OPN1LW	-0.137882	6.95362	-1.97578	0.0568326	0.999544	-3.90328
RBCK1	0.125762	9.49721	1.97568	0.0568454	0.999544	-3.90341
LOC100130472	0.112296	6.9303	1.97553	0.0568631	0.999544	-3.90358
FSTL1	-0.125011	6.74726	-1.97512	0.0569112	0.999544	-3.90405
FGF7	-0.142948	6.91943	-1.97499	0.0569272	0.999544	-3.90421
CCNB1IP1	-0.169187	10.9654	-1.97437	0.0570008	0.999544	-3.90493
LOC346157	-0.144074	7.02618	-1.97425	0.0570148	0.999544	-3.90506
OR6Q1	0.109189	6.76891	1.97322	0.0571374	0.999544	-3.90626
ENPP7	0.125787	7.08012	1.97275	0.0571935	0.999544	-3.90681
LOC441208	0.169142	6.90938	1.97255	0.0572173	0.999544	-3.90704
SKA1	0.154691	8.35916	1.97244	0.0572296	0.999544	-3.90716
LOC644165	-0.134353	6.8531	-1.9721	0.05727	0.999544	-3.90755
HOXD8	-0.130629	6.8757	-1.9719	0.0572939	0.999544	-3.90778
OR5M1	-0.150415	6.8785	-1.97158	0.0573331	0.999544	-3.90816
SLC4A8	-0.120744	6.88574	-1.97135	0.05736	0.999544	-3.90843
C21orf29	-0.131852	7.04553	-1.97125	0.0573714	0.999544	-3.90854
MFN2	0.147215	8.53619	1.97015	0.057503	0.999544	-3.90981
LOC100134025	0.133532	6.85251	1.97005	0.0575154	0.999544	-3.90993
TYW1	-0.135892	7.98892	-1.97003	0.0575175	0.999544	-3.90995
MIR766	0.12852	6.90689	1.97	0.0575209	0.999544	-3.90999
DAZ2	-0.138727	7.27711	-1.96977	0.0575489	0.999544	-3.91026
CHMP5	-0.158821	10.5494	-1.96971	0.0575565	0.999544	-3.91033
USP37	0.136631	7.81287	1.96934	0.0576	0.999544	-3.91075
TGM3	-0.117194	7.34654	-1.96894	0.0576483	0.999544	-3.91122
ANKRD35	0.155091	7.23015	1.96866	0.0576827	0.999544	-3.91155
COL13A1	-0.120639	7.1009	-1.96842	0.0577111	0.999544	-3.91182
CUX2	0.144867	7.28109	1.96781	0.0577837	0.999544	-3.91252
ELFN1	0.144321	6.87999	1.96733	0.0578418	0.999544	-3.91308
FLJ45721	-0.108464	6.91043	-1.96708	0.0578724	0.999544	-3.91338
DMRT2	0.124692	6.96029	1.96675	0.0579121	0.999544	-3.91376
QKI	0.165779	7.54383	1.96674	0.0579131	0.999544	-3.91377
TAS2R45	-0.127097	6.7626	-1.96665	0.0579239	0.999544	-3.91387
SNORD104	-0.192925	8.73742	-1.96646	0.0579467	0.999544	-3.91409
KIF4B	0.129537	6.95769	1.96613	0.0579866	0.999544	-3.91447
LOC100132843	0.137425	6.95386	1.9659	0.0580148	0.999544	-3.91474
LOC442711	-0.118073	6.96169	-1.96582	0.0580235	0.999544	-3.91483
LOC100133465	-0.22613	13.9048	-1.96488	0.0581368	0.999544	-3.91591
MIR135A2	-0.119333	6.86455	-1.96481	0.0581464	0.999544	-3.91601
MEG8	-0.155554	7.4098	-1.9647	0.0581597	0.999544	-3.91613
C21orf24	-0.265622	10.2312	-1.96433	0.0582033	0.999544	-3.91655
SARDH	-0.145033	6.90427	-1.96421	0.0582189	0.999544	-3.9167
LOC441601	0.136659	6.90581	1.96397	0.0582479	0.999544	-3.91698
FBS1	-0.149035	7.05603	-1.96362	0.05829	0.999544	-3.91738
LOC402160	0.146336	6.95004	1.96328	0.0583305	0.999544	-3.91776
LOC648982	0.114302	7.02104	1.96238	0.0584398	0.999544	-3.9188
LOC647681	0.14218	6.94849	1.96196	0.0584911	0.999544	-3.91929
LOC647920	-0.152965	7.04526	-1.96113	0.0585924	0.999544	-3.92026
LOC100130511	0.178953	10.2463	1.96078	0.0586348	0.999544	-3.92066
ALDH1B1	0.160216	8.59502	1.96059	0.0586579	0.999544	-3.92088
ZNF844	-0.125767	6.92067	-1.96051	0.0586671	0.999544	-3.92096
LGMN	0.164588	7.14018	1.96012	0.0587151	0.999544	-3.92142
LOC100133993	0.123884	6.90594	1.95949	0.0587921	0.999544	-3.92215
CDC2L6	-0.132451	9.8501	-1.95844	0.0589207	0.999544	-3.92336
LTBR	0.18041	9.34447	1.95813	0.0589585	0.999544	-3.92372
LOC100132979	0.137238	7.04386	1.9571	0.0590844	0.999544	-3.92491
LOC100129146	-0.11318	7.03246	-1.95672	0.0591306	0.999544	-3.92534
PSMD1	0.148102	10.278	1.95662	0.0591437	0.999544	-3.92546
MYST3	0.196524	9.01967	1.95648	0.0591603	0.999544	-3.92562
HNRPM	0.12247	13.0101	1.95621	0.0591932	0.999544	-3.92593
TULP2	-0.128986	6.73438	-1.95615	0.0592009	0.999544	-3.926
LOC728403	0.152785	6.84368	1.95606	0.0592113	0.999544	-3.9261
DPEP2	0.14374	7.36317	1.95565	0.0592624	0.999544	-3.92658
LOC202181	-0.128448	7.11716	-1.9555	0.0592801	0.999544	-3.92675
MIR1912	-0.128412	6.87834	-1.95545	0.0592869	0.999544	-3.92681
DKFZp686O24166	0.121465	8.7056	1.95534	0.0593	0.999544	-3.92693
CDKN2AIPNL	-0.321521	10.5446	-1.95519	0.0593189	0.999544	-3.92711
LOC644362	0.126558	6.93774	1.95477	0.0593701	0.999544	-3.92759
LOC647348	-0.15392	6.9777	-1.95435	0.0594227	0.999544	-3.92808
LOC100134687	0.134771	6.84119	1.95402	0.0594622	0.999544	-3.92845
LOC100130900	0.116094	6.99409	1.95373	0.0594989	0.999544	-3.92879
MIR877	0.124872	7.12026	1.95348	0.0595299	0.999544	-3.92908
JUND	0.124067	12.815	1.95343	0.059536	0.999544	-3.92914
FLJ31813	-0.135546	6.98732	-1.95341	0.0595383	0.999544	-3.92916
KIAA1279	0.195393	8.54724	1.95323	0.0595605	0.999544	-3.92937
PABPN1	0.144803	10.1284	1.95266	0.0596302	0.999544	-3.93002
MAST1	0.140885	6.85751	1.95203	0.0597085	0.999544	-3.93075
EIF4B	0.146539	11.8658	1.95201	0.0597104	0.999544	-3.93077
MRPS34	0.147827	9.51063	1.95095	0.0598426	0.999544	-3.932
LOC255130	0.100182	6.89186	1.95085	0.0598546	0.999544	-3.93211
LOC645978	0.142686	7.22974	1.95041	0.0599087	0.999544	-3.93261
PRR14	-0.170334	10.9384	-1.95013	0.0599435	0.999544	-3.93293
DOK6	0.134156	6.95675	1.95007	0.0599509	0.999544	-3.933
KNTC1	-0.151621	8.90813	-1.95004	0.0599546	0.999544	-3.93303
D4S234E	-0.135236	6.82083	-1.94996	0.0599647	0.999544	-3.93313
C16orf82	0.125629	6.76968	1.94994	0.0599674	0.999544	-3.93315
C16orf70	0.160433	7.25821	1.94993	0.0599687	0.999544	-3.93316
ATIC	0.126079	12.5323	1.94966	0.0600024	0.999544	-3.93348
BTBD9	0.127646	7.0428	1.94948	0.0600246	0.999544	-3.93368
ANKMY1	-0.152381	7.80589	-1.94914	0.060067	0.999544	-3.93407
SPATA4	-0.145425	7.15656	-1.94876	0.0601136	0.999544	-3.93451
LOC654134	0.140554	6.82574	1.94849	0.0601475	0.999544	-3.93482
LRRC20	-0.157504	8.80492	-1.94815	0.0601898	0.999544	-3.93521
LOC648394	-0.133769	6.98318	-1.94804	0.0602036	0.999544	-3.93534
C14orf167	-0.147199	8.62273	-1.94794	0.0602168	0.999544	-3.93546
TOP2B	0.133109	10.9502	1.94758	0.0602615	0.999544	-3.93587
CREG2	0.131157	6.80839	1.94755	0.060265	0.999544	-3.9359
LOC651017	0.11901	6.93135	1.94678	0.0603605	0.999544	-3.93678
ITGA7	0.139225	7.16151	1.94669	0.0603727	0.999544	-3.9369
RRP7B	-0.210955	13.569	-1.94665	0.0603771	0.999544	-3.93694
NECAP1	-0.132946	8.64768	-1.94615	0.0604392	0.999544	-3.93751
LOC285095	0.132784	7.04477	1.94613	0.0604416	0.999544	-3.93753
RPSA	-0.145988	14.8395	-1.94586	0.0604757	0.999544	-3.93784
SUCLG1	-0.143565	11.3127	-1.94562	0.0605054	0.999544	-3.93812
BTF3	0.129104	14.1974	1.94549	0.0605225	0.999544	-3.93827
EMX2	-0.125248	7.15681	-1.94539	0.0605351	0.999544	-3.93839
GABPB1	0.148931	7.84269	1.94504	0.060578	0.999544	-3.93878
A1BG	-0.136126	7.12643	-1.94481	0.0606068	0.999544	-3.93905
SFXN2	-0.153282	6.99799	-1.94464	0.060629	0.999544	-3.93925
C16orf47	0.117938	7.00878	1.94449	0.0606474	0.999544	-3.93942
CCT7	0.139623	13.0437	1.94404	0.0607037	0.999544	-3.93993
LOC646604	-0.143581	7.07894	-1.94386	0.0607262	0.999544	-3.94014
LOC100133885	0.146408	6.96862	1.94348	0.0607741	0.999544	-3.94058
AP1G2	-0.129044	7.48823	-1.94344	0.0607797	0.999544	-3.94063
JMJD5	-0.117419	7.11971	-1.94342	0.0607816	0.999544	-3.94065
C1orf105	0.140354	7.04426	1.94307	0.0608257	0.999544	-3.94105
AK1	-0.130195	7.45808	-1.94295	0.0608406	0.999544	-3.94118
LOC100132799	0.15162	6.91142	1.94271	0.0608704	0.999544	-3.94146
TPRKB	-0.139003	10.287	-1.94269	0.0608734	0.999544	-3.94148
HLA-E	0.154719	10.9984	1.94205	0.060954	0.999544	-3.94222
TAAR1	0.109823	7.06959	1.94203	0.0609567	0.999544	-3.94224
LOC728457	-0.161717	8.61042	-1.9417	0.0609976	0.999544	-3.94262
PCYOX1L	-0.142744	7.45709	-1.94169	0.0609997	0.999544	-3.94263
ATF6B	0.143972	7.85639	1.94132	0.0610463	0.999544	-3.94306
RAB40C	-0.129864	10.6652	-1.94061	0.0611354	0.999544	-3.94387
BCL6B	-0.151158	7.13237	-1.94056	0.0611416	0.999544	-3.94392
CCDC110	0.13397	6.79246	1.94045	0.0611562	0.999544	-3.94406
PLEC1	0.123734	7.27642	1.94004	0.0612075	0.999544	-3.94452
PLIN5	-0.170289	7.34871	-1.94002	0.0612099	0.999544	-3.94454
MOS	-0.170714	7.10791	-1.93993	0.0612217	0.999544	-3.94465
LOC728454	0.139496	6.99494	1.93989	0.0612272	0.999544	-3.9447
SLC9A10	-0.161262	6.95351	-1.93988	0.0612284	0.999544	-3.94471
LOC648751	-0.130353	6.95259	-1.93967	0.0612543	0.999544	-3.94495
POU5F2	0.0988714	6.77281	1.93958	0.0612663	0.999544	-3.94506
PMAIP1	-0.173751	7.86967	-1.93937	0.0612927	0.999544	-3.94529
FAM19A4	0.138909	7.18462	1.93936	0.0612932	0.999544	-3.9453
LOC728153	-0.157638	8.20943	-1.93936	0.0612938	0.999544	-3.9453
C9orf139	0.143572	6.79295	1.93913	0.0613232	0.999544	-3.94557
PFKP	0.127118	10.0649	1.939	0.0613389	0.999544	-3.94571
ATP6V0A4	-0.118805	7.01853	-1.93893	0.0613475	0.999544	-3.94579
SRGAP3	-0.130725	7.04372	-1.93885	0.0613578	0.999544	-3.94588
MID2	-0.131825	7.14766	-1.93854	0.0613968	0.999544	-3.94624
AFAR3	-0.161359	7.08523	-1.93844	0.0614101	0.999544	-3.94636
MARCH3	0.141808	8.04356	1.93838	0.0614176	0.999544	-3.94642
CYP2D7P1	-0.131022	7.05282	-1.9383	0.0614281	0.999544	-3.94652
LOC388559	0.125146	7.07707	1.93694	0.0616006	0.999544	-3.94808
CD34	-0.133762	7.11063	-1.93679	0.0616196	0.999544	-3.94825
C10orf6	-0.132926	8.33985	-1.93668	0.0616329	0.999544	-3.94837
LOC442181	-0.14096	7.07223	-1.93619	0.0616964	0.999544	-3.94894
BAG3	-0.172801	8.82463	-1.93541	0.0617949	0.999544	-3.94982
FAM107A	0.151739	6.79785	1.93538	0.0617988	0.999544	-3.94986
LIPJ	0.114066	7.03832	1.9352	0.0618213	0.999544	-3.95006
TADA2B	-0.12748	7.91718	-1.93477	0.0618769	0.999544	-3.95056
SLC16A12	-0.272564	11.3039	-1.93477	0.0618771	0.999544	-3.95056
LOC100131276	0.120618	6.88966	1.9343	0.0619362	0.999544	-3.95109
LOC645724	0.115498	6.88836	1.93421	0.0619478	0.999544	-3.9512
LOC646044	0.149316	8.84609	1.93399	0.0619759	0.999544	-3.95145
CNTD2	-0.11211	6.85095	-1.93367	0.0620167	0.999544	-3.95181
LYAR	0.147292	11.3398	1.93346	0.0620437	0.999544	-3.95205
FUS	0.145566	8.65907	1.9333	0.062064	0.999544	-3.95223
CDX4	-0.125312	6.77155	-1.93292	0.0621137	0.999544	-3.95268
TXNDC3	-0.145236	7.08121	-1.93267	0.062145	0.999544	-3.95296
TCF4	-0.147169	6.99134	-1.93227	0.0621968	0.999544	-3.95342
LOC643341	-0.145278	6.96301	-1.93201	0.0622294	0.999544	-3.95371
FLJ38717	-0.133315	7.33719	-1.93198	0.0622331	0.999544	-3.95375
FLJ40852	0.140114	7.12013	1.93154	0.0622905	0.999544	-3.95426
LCLAT1	0.115769	9.25836	1.93136	0.0623131	0.999544	-3.95446
BRDT	-0.103822	6.84648	-1.93059	0.062412	0.999544	-3.95534
LOC651562	0.108322	6.90974	1.93055	0.0624168	0.999544	-3.95538
C9orf86	0.158999	8.23847	1.93028	0.0624521	0.999544	-3.95569
LOC644567	-0.131708	6.81945	-1.93004	0.0624833	0.999544	-3.95597
TTTY17C	-0.179916	6.89838	-1.92975	0.0625196	0.999544	-3.95629
LOC730351	0.125642	6.91607	1.92954	0.0625466	0.999544	-3.95653
FNDC3A	-0.162281	7.88599	-1.92921	0.0625892	0.999544	-3.95691
LOC643195	0.132852	6.99718	1.92913	0.0625994	0.999544	-3.957
TLK1	0.175841	8.30174	1.92886	0.0626342	0.999544	-3.95731
MKNK1	0.147689	9.40185	1.92886	0.062635	0.999544	-3.95732
FLJ20184	-0.134468	6.98688	-1.92864	0.0626629	0.999544	-3.95756
BACH2	-0.118835	7.08859	-1.92856	0.0626739	0.999544	-3.95766
SDF4	0.123222	9.89032	1.92849	0.0626821	0.999544	-3.95773
OR6C74	0.121326	6.90662	1.92844	0.0626889	0.999544	-3.95779
RILPL2	0.162445	10.8477	1.92798	0.0627484	0.999544	-3.95832
MGC70863	0.151178	7.3709	1.92795	0.0627525	0.999544	-3.95836
LOC100129278	-0.124816	6.93109	-1.92791	0.0627571	0.999544	-3.9584
GNAS	0.112154	12.7685	1.92786	0.0627636	0.999544	-3.95845
MAP4	-0.161572	7.16123	-1.92756	0.0628021	0.999544	-3.95879
LOC100133981	0.126694	7.2928	1.92719	0.0628507	0.999544	-3.95922
FLJ36131	-0.341263	8.64825	-1.92686	0.0628935	0.999544	-3.9596
YDJC	0.126919	8.64832	1.9267	0.062914	0.999544	-3.95978
LOC100129027	-0.174948	7.32527	-1.92668	0.062916	0.999544	-3.9598
MIR193A	0.129144	6.87748	1.92591	0.0630155	0.999544	-3.96067
OIT3	-0.127333	6.89436	-1.9259	0.0630179	0.999544	-3.9607
LOC388796	-0.157789	9.03647	-1.92539	0.0630836	0.999544	-3.96127
ATP6V0B	-0.105298	12.0361	-1.92536	0.0630868	0.999544	-3.9613
UBE2B	-0.123241	7.05643	-1.9253	0.0630953	0.999544	-3.96138
SCARNA12	0.129772	7.23599	1.92501	0.0631323	0.999544	-3.9617
BMS1P5	-0.268942	9.48221	-1.92497	0.0631382	0.999544	-3.96175
TTTY4C	0.123838	6.90345	1.92463	0.0631819	0.999544	-3.96214
YTHDF2	0.151237	10.6671	1.92423	0.0632339	0.999544	-3.96259
C10orf67	0.15578	6.91928	1.92415	0.063244	0.999544	-3.96268
DSP	0.134122	7.07989	1.924	0.0632646	0.999544	-3.96286
LOC642196	0.123958	6.85707	1.92396	0.0632692	0.999544	-3.9629
LOC100127975	-0.163946	9.13651	-1.92345	0.0633357	0.999544	-3.96348
LOC554226	0.123323	6.95949	1.92345	0.0633362	0.999544	-3.96349
NR2C2AP	0.140417	9.85003	1.92322	0.063366	0.999544	-3.96375
KIAA2018	0.120374	6.95922	1.9231	0.0633806	0.999544	-3.96388
LOC100134370	-0.119266	6.93378	-1.923	0.0633944	0.999544	-3.964
LOC728715	-0.124365	7.34633	-1.92283	0.0634167	0.999544	-3.96419
LOC645012	-0.130928	6.82424	-1.92276	0.0634259	0.999544	-3.96427
LYRM1	-0.142673	10.4996	-1.92271	0.0634314	0.999544	-3.96432
GAPVD1	-0.150009	9.59407	-1.92243	0.0634683	0.999544	-3.96464
LOC653563	0.12855	7.02631	1.92124	0.0636235	0.999544	-3.966
TCF19	0.14531	7.59312	1.92096	0.0636599	0.999544	-3.96631
FLJ35390	-0.281999	8.719	-1.92071	0.0636932	0.999544	-3.9666
KCNH6	-0.285015	11.1157	-1.92052	0.0637185	0.999544	-3.96682
MIR1299	0.124129	6.86808	1.9202	0.0637595	0.999544	-3.96718
LOC730919	0.123005	6.9668	1.92004	0.0637804	0.999544	-3.96736
FAM9B	-0.127347	6.9225	-1.91996	0.0637909	0.999544	-3.96745
STAT4	-0.138099	7.01262	-1.91984	0.063807	0.999544	-3.96759
LOC646348	0.152442	7.26973	1.91928	0.0638805	0.999544	-3.96823
C8orf76	-0.108073	11.7766	-1.91926	0.0638828	0.999544	-3.96825
UNC119	0.135568	8.46883	1.91872	0.0639533	0.999544	-3.96886
HISPPD1	-0.115981	6.77452	-1.91866	0.0639618	0.999544	-3.96894
LGALS9B	0.12869	7.258	1.91831	0.0640081	0.999544	-3.96934
ATRIP	-0.109158	8.7017	-1.91799	0.0640493	0.999544	-3.96969
CTDSP2	-0.165412	9.57246	-1.91768	0.0640904	0.999544	-3.97005
LOC100133695	0.152566	7.08532	1.91702	0.0641773	0.999544	-3.9708
MTERFD3	0.140453	6.98682	1.91698	0.0641829	0.999544	-3.97085
RSPO3	0.157167	6.95327	1.91694	0.0641882	0.999544	-3.97089
VPS54	0.108784	7.50354	1.91687	0.0641971	0.999544	-3.97097
MYO18A	0.147572	7.39709	1.91671	0.0642188	0.999544	-3.97116
LOC649191	0.130412	6.86628	1.91634	0.064267	0.999544	-3.97157
RBM4B	-0.188846	8.73127	-1.91628	0.0642747	0.999544	-3.97164
LOC100133478	-0.14887	7.85655	-1.91628	0.064275	0.999544	-3.97164
MAP3K14	0.167512	7.23983	1.91581	0.0643363	0.999544	-3.97217
LOC390594	0.132399	6.93951	1.91547	0.0643811	0.999544	-3.97256
C1orf167	-0.11329	6.9442	-1.91535	0.0643972	0.999544	-3.97269
KRT18P42	-0.126624	7.05361	-1.91467	0.0644875	0.999544	-3.97347
LOC730232	-0.118891	6.98635	-1.91464	0.0644915	0.999544	-3.9735
LOC100134819	0.116052	6.99313	1.91405	0.06457	0.999544	-3.97418
LOC100134787	0.139297	6.94791	1.9138	0.0646031	0.999544	-3.97446
CNDP1	0.119759	6.80771	1.91375	0.0646095	0.999544	-3.97452
PLEKHH1	-0.120763	6.86593	-1.9136	0.0646289	0.999544	-3.97468
LOC100129751	-0.110837	6.99517	-1.91342	0.0646526	0.999544	-3.97489
LOC100134674	0.112517	6.87238	1.91294	0.0647165	0.999544	-3.97543
FAM103A1	-0.161911	8.92291	-1.9129	0.0647218	0.999544	-3.97548
TRIM73	-0.139777	7.28951	-1.91174	0.0648753	0.999544	-3.97679
GPR128	0.129364	7.03222	1.91166	0.0648861	0.999544	-3.97688
SCARF1	0.138236	6.93946	1.91138	0.0649238	0.999544	-3.9772
LOC646299	-0.131088	6.9212	-1.91097	0.0649777	0.999544	-3.97766
INO80	0.126595	8.46953	1.91091	0.0649865	0.999544	-3.97774
ASGR2	0.217582	8.33488	1.91087	0.0649922	0.999544	-3.97779
LOC649429	0.12426	6.97432	1.91048	0.0650441	0.999544	-3.97823
C5orf43	-0.125308	7.02137	-1.90964	0.0651557	0.999544	-3.97918
LOC646818	0.128026	6.89819	1.90956	0.0651664	0.999544	-3.97927
MIR338	0.134429	6.85956	1.9092	0.0652141	0.999544	-3.97967
LOC644342	0.126635	6.8859	1.90906	0.0652325	0.999544	-3.97983
TUBG2	-0.155955	7.1999	-1.90886	0.06526	0.999544	-3.98006
MAP3K12	-0.133952	7.13999	-1.9072	0.0654813	0.999544	-3.98194
GALNT6	-0.127664	6.99472	-1.90717	0.0654851	0.999544	-3.98197
KLC3	0.109257	6.95474	1.90714	0.0654899	0.999544	-3.98201
MIR7-1	0.140356	6.87202	1.90711	0.0654943	0.999544	-3.98205
TSIX	-0.12634	6.84206	-1.90706	0.0655009	0.999544	-3.9821
LOC732139	-0.138818	7.05524	-1.9067	0.0655488	0.999544	-3.98251
TRIM35	0.157252	7.8081	1.90663	0.0655586	0.999544	-3.98259
FLJ10246	0.104961	6.98744	1.90639	0.0655907	0.999544	-3.98286
CT45A6	0.146295	7.06998	1.90638	0.0655914	0.999544	-3.98287
SKIP	-0.122838	6.94512	-1.90623	0.0656111	0.999544	-3.98303
PRPF38A	0.147456	9.41871	1.90603	0.0656392	0.999544	-3.98327
C6orf100	0.142761	7.05274	1.90554	0.0657038	0.999544	-3.98381
LOC100190938	-0.299518	10.5186	-1.90549	0.0657109	0.999544	-3.98387
MYLK4	0.117702	6.89788	1.90549	0.0657113	0.999544	-3.98388
CEP170	0.112418	7.15847	1.90538	0.0657255	0.999544	-3.984
C6orf59	-0.132614	6.93669	-1.90519	0.065752	0.999544	-3.98422
LOC400352	0.12438	7.02463	1.90495	0.0657838	0.999544	-3.98449
AGC1	-0.110117	6.82718	-1.9044	0.0658579	0.999544	-3.98511
[truncated: 29,427 more rows]

## Sheet: 4h
	logFC	AveExpr	t	P.Value	adj.P.Val	B
JUN	2.4062	8.78965	28.457	2.45712e-24	7.72174e-20	14.6278
EGR1	1.32547	8.63448	15.0866	4.01374e-16	6.30679e-12	11.523
ATF3	0.883502	8.3195	9.57828	6.26779e-11	6.56572e-07	7.54946
DUSP1	0.605553	7.77483	8.41023	1.2807e-09	1.00618e-05	6.22421
BTG2	0.525214	7.95323	5.296	8.33593e-06	0.052393	1.60566
IL8	0.909581	11.3705	5.22861	1.01457e-05	0.0531399	1.49019
IL1B	0.632564	7.81291	4.73181	4.30206e-05	0.193138	0.627043
LOC100128304	-0.319462	7.35088	-4.64455	5.53765e-05	0.217533	0.47375
ZFP36	0.473155	10.7709	4.60262	6.25071e-05	0.218261	0.399965
UBE2J2	0.416109	8.65872	4.44114	9.95134e-05	0.312731	0.115266
LOC643154	-0.296089	7.00829	-4.15008	0.00022844	0.652631	-0.398809
ITGB1BP3	0.270423	6.99157	4.11387	0.000253118	0.662873	-0.462711
LOC729519	0.297281	7.43276	3.9806	0.000368592	0.845918	-0.697601
KIF13A	-0.231767	6.90934	-3.97271	0.000376849	0.845918	-0.711483
RDH14	0.23504	10.242	3.85622	0.000522017	0.999382	-0.91611
LOC643377	-0.238738	6.89614	-3.85209	0.000528058	0.999382	-0.92335
WDR22	0.23022	7.67122	3.78679	0.000633127	0.999382	-1.03766
TLR10	-0.232446	7.03053	-3.70677	0.00078986	0.999382	-1.1773
LOC643901	0.254098	6.97197	3.68482	0.000839067	0.999382	-1.21551
LOC388900	0.237209	6.91405	3.66939	0.00087542	0.999382	-1.24234
CLDN3	0.257223	6.82896	3.65798	0.000903274	0.999382	-1.26216
SNORD52	-0.254524	7.48567	-3.65341	0.000914677	0.999382	-1.2701
TBN	-0.264486	7.21092	-3.63289	0.000967612	0.999382	-1.30572
TAAR3	0.247771	6.99726	3.62695	0.000983465	0.999382	-1.31601
LOC644297	-0.207661	6.92503	-3.61809	0.00100761	0.999382	-1.33137
dJ222E13.2	0.241476	7.34823	3.61449	0.00101758	0.999382	-1.33761
LOC653375	0.256701	8.23117	3.61071	0.00102815	0.999382	-1.34416
ZNF227	0.243278	8.00647	3.60033	0.00105773	0.999382	-1.36213
GATA4	-0.232975	6.84304	-3.5393	0.00124902	0.999382	-1.46757
HNRNPCL1	0.206142	7.02746	3.53912	0.00124964	0.999382	-1.46788
SLAIN2	0.262783	7.44668	3.53411	0.00126674	0.999382	-1.47651
LOC649107	-0.223277	6.92346	-3.49926	0.00139227	0.999382	-1.53651
LOC286456	0.224505	6.99184	3.49846	0.00139527	0.999382	-1.53788
LOC648680	0.21299	6.88057	3.49257	0.00141769	0.999382	-1.54801
FAAH2	0.259384	7.01142	3.4924	0.00141835	0.999382	-1.5483
C15orf56	0.21363	6.76749	3.45725	0.00155956	0.999382	-1.60862
KCNN3	-0.236847	6.94784	-3.44173	0.00162614	0.999382	-1.6352
HSPC268	-0.387157	8.31365	-3.42572	0.00169764	0.999382	-1.66258
CLN8	-0.267724	7.60045	-3.39058	0.00186546	0.999382	-1.72256
FAM71E2	0.218601	7.34028	3.39026	0.00186703	0.999382	-1.7231
ZNF483	-0.265547	7.60292	-3.37482	0.00194578	0.999382	-1.7494
CD300LB	-0.198562	6.93472	-3.33217	0.00218017	0.999382	-1.82184
RNU11	0.207735	7.26078	3.32661	0.00221264	0.999382	-1.83126
LOC651704	-0.200511	6.82837	-3.31275	0.00229567	0.999382	-1.85474
TELO2	0.344145	8.33852	3.31216	0.00229924	0.999382	-1.85573
LOC441436	-0.210307	6.97138	-3.30444	0.00234687	0.999382	-1.8688
LOC100133403	0.169295	6.94932	3.30421	0.00234828	0.999382	-1.86918
RNU4ATAC	0.240428	7.63118	3.29451	0.00240946	0.999382	-1.88557
MIR1246	0.198996	6.89948	3.29265	0.00242137	0.999382	-1.88872
LOC100129907	-0.239584	7.80779	-3.27638	0.00252793	0.999382	-1.91617
USP47	0.216099	7.27241	3.26895	0.00257808	0.999382	-1.9287
ACAP2	0.255403	8.02861	3.24333	0.00275836	0.999382	-1.9718
SNORA71A	0.199602	7.0034	3.23479	0.00282107	0.999382	-1.98614
LOC646066	-0.200096	6.86037	-3.2254	0.00289166	0.999382	-2.00191
LOC100129643	0.17601	6.97472	3.21409	0.00297882	0.999382	-2.02085
LOC651166	0.21923	7.19519	3.19208	0.00315584	0.999382	-2.05769
CEP72	0.215264	7.49454	3.18884	0.00318274	0.999382	-2.0631
BTBD16	0.193145	6.78938	3.18761	0.00319297	0.999382	-2.06515
ANXA3	0.229108	6.91249	3.18391	0.00322402	0.999382	-2.07133
T-SP1	0.214744	7.10648	3.17572	0.00329381	0.999382	-2.08499
LOC729879	0.253551	6.8544	3.16905	0.0033517	0.999382	-2.09611
GAGE12G	0.202591	6.95459	3.16227	0.00341156	0.999382	-2.10741
SUPV3L1	0.204715	8.91565	3.15161	0.00350774	0.999382	-2.12516
LOC100093631	0.217333	7.08257	3.15141	0.00350951	0.999382	-2.12548
CIB2	-0.197827	6.94956	-3.14721	0.00354813	0.999382	-2.13246
LOC647558	0.162716	6.87602	3.13521	0.00366068	0.999382	-2.1524
LOC441420	0.216684	6.86641	3.13246	0.00368695	0.999382	-2.15696
ACSBG1	0.21612	7.01948	3.12752	0.00373462	0.999382	-2.16517
LOC651746	-0.228315	6.87706	-3.12656	0.0037439	0.999382	-2.16675
CHRNA1	-0.213178	7.10241	-3.12021	0.00380619	0.999382	-2.17728
ATF4	0.265125	12.9973	3.11862	0.00382188	0.999382	-2.17991
NCL	0.202376	12.9803	3.11744	0.00383366	0.999382	-2.18188
LOC647954	-0.204173	7.03208	-3.11434	0.00386462	0.999382	-2.18701
SGK269	-0.199245	6.81146	-3.09996	0.00401127	0.999382	-2.21079
LOC144817	-0.198728	6.93234	-3.09804	0.00403124	0.999382	-2.21396
ZNF17	0.2052	8.52243	3.09707	0.00404135	0.999382	-2.21556
LOC642147	0.254986	7.01253	3.09521	0.00406087	0.999382	-2.21864
TTTY17B	-0.188341	6.8587	-3.09482	0.00406503	0.999382	-2.21929
GTPBP10	0.207159	7.51646	3.09455	0.00406781	0.999382	-2.21973
LOC646029	0.18809	6.86678	3.0892	0.00412447	0.999382	-2.22856
REM2	-0.182527	6.87484	-3.08764	0.00414115	0.999382	-2.23114
LOC651427	-0.20423	6.99001	-3.08498	0.00416974	0.999382	-2.23553
LOC652865	0.208296	6.88855	3.08182	0.00420391	0.999382	-2.24074
LOC100129027	-0.279828	7.32527	-3.08172	0.00420504	0.999382	-2.24091
FTCD	-0.167463	6.8947	-3.06262	0.0044174	0.999382	-2.27237
B3GNT1	-0.271081	8.27975	-3.06167	0.00442816	0.999382	-2.27392
LOC648815	0.226553	7.05896	3.06154	0.00442964	0.999382	-2.27414
FLJ46010	-0.1935	6.98354	-3.05928	0.00445553	0.999382	-2.27786
LOC647333	0.219547	6.95085	3.05861	0.00446326	0.999382	-2.27896
P2RY2	0.242498	10.3297	3.05088	0.00455288	0.999382	-2.29166
LOC100128460	-0.208903	7.01066	-3.04925	0.00457201	0.999382	-2.29434
DEFB126	0.207353	6.7447	3.04912	0.00457349	0.999382	-2.29454
ADAMTS4	0.207596	7.04124	3.03865	0.00469824	0.999382	-2.31173
LOC390031	0.181109	6.85038	3.03487	0.00474408	0.999382	-2.31793
LOC100128270	0.177401	6.94155	3.03467	0.00474652	0.999382	-2.31826
PDIK1L	0.183179	7.94261	3.03347	0.00476115	0.999382	-2.32022
C1QC	-0.227302	6.96823	-3.03332	0.00476304	0.999382	-2.32048
NUBPL	-0.304344	8.30958	-3.02845	0.00482285	0.999382	-2.32844
CASC1	-0.201656	6.74824	-3.02826	0.00482519	0.999382	-2.32875
RNF12	-0.211162	7.06978	-3.02339	0.00488576	0.999382	-2.33672
SCARNA27	0.287573	7.21646	3.02198	0.00490351	0.999382	-2.33904
LOC646046	0.196162	6.97856	3.01305	0.00501689	0.999382	-2.35363
LOC643899	0.190262	6.82888	3.01219	0.00502797	0.999382	-2.35504
MIR450A1	-0.194168	7.08074	-3.00708	0.00509406	0.999382	-2.36338
OPN5	-0.211708	7.13585	-3.00539	0.00511617	0.999382	-2.36615
C2orf78	-0.179076	6.98185	-2.99796	0.00521415	0.999382	-2.37826
LOC100133885	0.22505	6.96862	2.98742	0.00535641	0.999382	-2.39545
FAM123B	0.205017	7.0199	2.98103	0.0054443	0.999382	-2.40584
ZC3HAV1	-0.229157	10.0585	-2.97963	0.00546383	0.999382	-2.40813
CCDC105	0.175919	6.85592	2.97371	0.00554671	0.999382	-2.41774
LOC728129	0.173509	6.9691	2.9725	0.00556388	0.999382	-2.41971
MIR21	0.210622	6.83113	2.97051	0.0055921	0.999382	-2.42294
SSX5	0.18255	6.89246	2.96854	0.00562011	0.999382	-2.42613
NOLC1	0.212568	9.05235	2.96598	0.00565688	0.999382	-2.4303
SNORA59B	0.25258	7.19589	2.96592	0.00565774	0.999382	-2.4304
AP1G2	-0.19681	7.48823	-2.96401	0.00568524	0.999382	-2.43349
C9orf14	-0.165504	6.89368	-2.96203	0.00571391	0.999382	-2.4367
LOC646818	0.198415	6.89819	2.95945	0.00575159	0.999382	-2.4409
MIR646	0.202838	6.95162	2.95879	0.00576117	0.999382	-2.44196
JMJD5	-0.178762	7.11971	-2.95873	0.00576205	0.999382	-2.44206
SMG5	0.219594	10.2799	2.95451	0.00582408	0.999382	-2.4489
HOXB5	-0.27581	7.19457	-2.95275	0.00585023	0.999382	-2.45176
BMP3	0.234099	6.91553	2.95146	0.00586934	0.999382	-2.45384
KIAA0146	-0.190286	8.91972	-2.94633	0.00594625	0.999382	-2.46215
OR56A3	-0.17129	6.94062	-2.93633	0.00609871	0.999382	-2.47832
UNC45A	0.223719	10.6981	2.93562	0.00610973	0.999382	-2.47947
TOX3	-0.194654	6.80581	-2.93558	0.00611034	0.999382	-2.47953
C10orf2	0.189857	9.16944	2.93357	0.0061415	0.999382	-2.48278
TGM1	-0.170273	7.05369	-2.93293	0.00615148	0.999382	-2.48382
LOC728799	-0.19869	6.95507	-2.92844	0.00622176	0.999382	-2.49107
LOC644450	0.19243	6.89945	2.9261	0.00625861	0.999382	-2.49484
ADH1C	0.179484	6.91718	2.92421	0.00628861	0.999382	-2.49789
PDE12	0.209791	8.75655	2.92182	0.00632679	0.999382	-2.50175
H19	0.193781	6.77195	2.90891	0.00653625	0.999382	-2.52255
OR5AK2	0.184772	6.76867	2.90295	0.00663515	0.999382	-2.53213
HES3	-0.183456	7.02061	-2.90291	0.00663589	0.999382	-2.5322
ZNF367	0.206073	7.10291	2.89708	0.00673399	0.999382	-2.54157
LOC100130960	-0.207283	6.84601	-2.89666	0.00674106	0.999382	-2.54224
C16orf59	0.202409	8.46081	2.89539	0.00676273	0.999382	-2.54429
LOC729459	-0.22694	6.91755	-2.89514	0.00676686	0.999382	-2.54468
SOX17	0.191168	6.72254	2.89123	0.00683371	0.999382	-2.55095
PCDHGB1	0.165332	6.88321	2.88925	0.00686794	0.999382	-2.55414
OR2A2	0.176313	7.04128	2.887	0.00690689	0.999382	-2.55775
LOC644707	-0.207858	6.87971	-2.8731	0.00715218	0.999382	-2.58002
HS3ST1	0.208369	7.09695	2.87293	0.00715518	0.999382	-2.58029
LOC647211	0.186932	6.96847	2.86713	0.00725998	0.999382	-2.58957
LOC646428	-0.186632	6.8417	-2.86641	0.00727301	0.999382	-2.59072
ZBED3	0.193391	6.91874	2.86351	0.0073261	0.999382	-2.59536
IER2	0.211111	8.15529	2.86164	0.00736042	0.999382	-2.59834
HLA-DQB1	0.206267	7.0027	2.8589	0.00741106	0.999382	-2.60271
LOC652846	-0.190507	6.96349	-2.85593	0.00746634	0.999382	-2.60746
CCDC23	-0.149918	9.83139	-2.85573	0.00747014	0.999382	-2.60778
KRTAP12-1	-0.216335	6.91044	-2.85489	0.0074858	0.999382	-2.60912
SIGLEC9	-0.210238	7.1801	-2.84993	0.00757915	0.999382	-2.61702
ZNF394	-0.326873	9.14974	-2.84721	0.00763084	0.999382	-2.62136
C10orf110	-0.153312	6.99187	-2.84697	0.00763547	0.999382	-2.62175
GPC4	-0.163412	6.76015	-2.84117	0.00774689	0.999382	-2.63099
LOC100130633	-0.207963	8.44395	-2.8406	0.00775795	0.999382	-2.6319
MRGPRX4	0.201039	6.95243	2.83554	0.00785641	0.999382	-2.63995
EID2B	-0.397172	9.67686	-2.83418	0.0078831	0.999382	-2.64211
QRFPR	-0.32063	9.15615	-2.83255	0.00791511	0.999382	-2.64469
LOC653641	0.200973	6.97578	2.83201	0.00792592	0.999382	-2.64556
LOC652570	-0.182785	6.88945	-2.83165	0.00793302	0.999382	-2.64614
LOC653423	-0.185014	7.03799	-2.83163	0.00793342	0.999382	-2.64617
RAB33A	-0.257382	8.0181	-2.83156	0.00793471	0.999382	-2.64627
MCM6	0.217677	12.4446	2.83144	0.00793721	0.999382	-2.64647
MIR155HG	-0.24419	7.59902	-2.82292	0.00810727	0.999382	-2.66
TRIM65	0.182031	7.55417	2.82177	0.00813063	0.999382	-2.66183
LOC651921	0.182299	6.90849	2.81967	0.00817316	0.999382	-2.66516
ECAT1	0.174791	7.00458	2.81814	0.00820438	0.999382	-2.66759
LOC728018	0.213936	6.85212	2.81729	0.00822167	0.999382	-2.66893
C21orf24	-0.380773	10.2312	-2.8159	0.00825014	0.999382	-2.67114
PTGR2	-0.243254	7.40247	-2.81551	0.00825807	0.999382	-2.67175
C11orf37	-0.264522	6.96742	-2.81227	0.00832493	0.999382	-2.67689
SNX7	0.233091	7.03782	2.81119	0.00834724	0.999382	-2.6786
LOC100128208	0.196461	6.82922	2.81065	0.00835846	0.999382	-2.67946
OR2AG1	-0.171445	6.85436	-2.80336	0.00851115	0.999382	-2.691
LOC730134	-0.169754	7.26826	-2.8029	0.00852085	0.999382	-2.69173
ASAP1IT1	0.162067	6.86563	2.80092	0.0085627	0.999382	-2.69485
LOC728707	-0.178137	6.82152	-2.79902	0.00860309	0.999382	-2.69785
HESX1	-0.227926	7.46185	-2.79826	0.00861949	0.999382	-2.69907
LOC731602	0.171268	7.05219	2.79819	0.00862088	0.999382	-2.69917
OR1M1	0.16289	6.74644	2.79601	0.00866769	0.999382	-2.70262
ACR	0.176078	6.90013	2.79474	0.00869494	0.999382	-2.70463
LOC644132	0.166776	9.30995	2.79244	0.00874457	0.999382	-2.70825
GLS2	0.186833	7.02409	2.79228	0.00874805	0.999382	-2.70851
NPL	0.202407	8.55603	2.79088	0.00877849	0.999382	-2.71072
LOC654091	-0.171513	6.90384	-2.79087	0.0087786	0.999382	-2.71073
DDX51	-0.42441	9.01838	-2.79029	0.00879125	0.999382	-2.71165
FAM75A1	-0.173594	7.01882	-2.78996	0.00879849	0.999382	-2.71217
LOC651315	-0.178247	6.90441	-2.78964	0.00880551	0.999382	-2.71268
SNORA25	-0.255359	7.67775	-2.78866	0.00882681	0.999382	-2.71422
TUBA8	-0.20069	6.86772	-2.78842	0.00883209	0.999382	-2.7146
LOC647054	0.163649	6.89789	2.78808	0.00883953	0.999382	-2.71514
RASGRF2	-0.188722	6.83935	-2.78352	0.00893985	0.999382	-2.72234
NKX6-1	0.165828	6.73986	2.77688	0.00908767	0.999382	-2.73279
FLJ30375	-0.188104	6.94637	-2.77679	0.00908974	0.999382	-2.73294
DHRS3	0.227801	7.53142	2.77633	0.00910009	0.999382	-2.73366
HIGD1B	-0.247918	6.78133	-2.77298	0.0091756	0.999382	-2.73893
ADAT2	0.187081	7.50624	2.77234	0.00919007	0.999382	-2.73993
RPPH1	0.22061	8.68512	2.76993	0.00924506	0.999382	-2.74374
SFRS18	-0.183501	8.88609	-2.76916	0.00926259	0.999382	-2.74494
DEFB110	0.191242	6.95601	2.76724	0.00930648	0.999382	-2.74796
FOS	0.27143	8.84493	2.7664	0.00932593	0.999382	-2.74929
LOC642347	0.171414	7.012	2.76556	0.0093452	0.999382	-2.7506
WDR63	0.213709	7.00521	2.76532	0.00935062	0.999382	-2.75097
LOC100129975	-0.217403	7.02858	-2.76028	0.00946763	0.999382	-2.7589
MYCBPAP	0.170562	6.81622	2.75888	0.00950039	0.999382	-2.7611
ANKRD56	0.170325	6.87965	2.75618	0.00956372	0.999382	-2.76533
LOC642775	0.205316	6.97213	2.75501	0.00959118	0.999382	-2.76716
PPM1B	0.15125	10.0105	2.75226	0.00965641	0.999382	-2.77148
IHH	0.183117	6.94299	2.75183	0.00966651	0.999382	-2.77215
LOC729153	0.142944	7.01333	2.7515	0.00967442	0.999382	-2.77267
SYF2	0.200213	10.6868	2.74786	0.00976151	0.999382	-2.77838
KLF9	0.189158	8.47593	2.74616	0.00980228	0.999382	-2.78103
SDHC	-0.20814	10.6932	-2.74175	0.00990919	0.999382	-2.78794
MIP	0.193866	6.9468	2.73767	0.0100088	0.999382	-2.79432
LOC100132147	-0.21838	7.09252	-2.73608	0.010048	0.999382	-2.79681
FLJ45721	-0.150812	6.91043	-2.73509	0.0100725	0.999382	-2.79836
LOC652612	-0.169633	6.96166	-2.73471	0.0100818	0.999382	-2.79895
OR51D1	0.169244	6.84896	2.73454	0.010086	0.999382	-2.79921
MGC13168	-0.192285	7.17581	-2.73437	0.0100903	0.999382	-2.79949
C8orf45	-0.409018	9.23243	-2.73404	0.0100985	0.999382	-2.8
NBPF4	0.19649	6.85478	2.72947	0.0102122	0.999382	-2.80713
CDC23	0.165963	10.2177	2.72596	0.0103004	0.999382	-2.81261
LOC646509	-0.196097	7.07251	-2.72438	0.0103404	0.999382	-2.81508
NXF5	-0.197023	6.94039	-2.72388	0.0103532	0.999382	-2.81587
RNF180	-0.2234	6.95202	-2.72268	0.0103835	0.999382	-2.81773
SLC7A10	0.19658	6.80336	2.72015	0.0104481	0.999382	-2.82168
ADCYAP1R1	-0.165253	6.77397	-2.71987	0.0104553	0.999382	-2.82212
WDR64	-0.207074	6.95247	-2.71931	0.0104695	0.999382	-2.82298
GBGT1	0.168311	9.20659	2.71832	0.0104949	0.999382	-2.82452
FLJ42280	0.202092	6.99295	2.71553	0.0105668	0.999382	-2.82887
RGS5	-0.164764	6.93764	-2.71337	0.0106229	0.999382	-2.83224
RIMS3	0.204485	6.86642	2.712	0.0106585	0.999382	-2.83437
RGS12	0.185125	7.97749	2.71073	0.0106914	0.999382	-2.83634
TULP1	-0.165329	6.74958	-2.70846	0.0107509	0.999382	-2.83987
EEPD1	0.216477	7.4122	2.70714	0.0107857	0.999382	-2.84193
LOC649963	0.148895	6.94415	2.70679	0.0107949	0.999382	-2.84247
LOC644113	-0.195804	7.30847	-2.70545	0.0108304	0.999382	-2.84456
LOC645805	-0.227853	6.87561	-2.70509	0.0108397	0.999382	-2.84511
SNX33	-0.173701	7.55079	-2.7045	0.0108555	0.999382	-2.84603
NTRK1	-0.152719	7.02193	-2.70137	0.0109387	0.999382	-2.8509
LOC388494	-0.166805	6.90335	-2.6998	0.0109805	0.999382	-2.85333
SIX1	0.182645	6.83409	2.69889	0.0110049	0.999382	-2.85474
GNAT2	0.158615	6.8485	2.69719	0.0110507	0.999382	-2.85738
USP28	0.139299	6.94401	2.69699	0.0110561	0.999382	-2.85769
HCG26	0.16384	6.96837	2.6967	0.011064	0.999382	-2.85815
MYOM2	-0.207548	7.89725	-2.69437	0.011127	0.999382	-2.86176
LOC728924	0.197104	6.97726	2.69315	0.0111601	0.999382	-2.86366
BRI3BP	-0.173505	10.5365	-2.69216	0.011187	0.999382	-2.86519
HMGCS2	0.170823	6.8795	2.69149	0.0112052	0.999382	-2.86622
LOC91661	-0.188964	6.90848	-2.69145	0.0112063	0.999382	-2.86628
FABP1	-0.16744	7.00941	-2.68886	0.0112773	0.999382	-2.8703
KIAA1239	0.166045	6.96299	2.68857	0.0112851	0.999382	-2.87074
LOC100128010	0.200991	6.88183	2.68652	0.0113416	0.999382	-2.87392
CXorf55	0.17537	6.90417	2.68557	0.0113679	0.999382	-2.8754
PRKACG	-0.177419	6.83318	-2.68525	0.0113768	0.999382	-2.87589
PI4KB	0.233023	8.27236	2.68488	0.0113871	0.999382	-2.87647
GJA10	-0.168808	6.9182	-2.68261	0.0114501	0.999382	-2.87998
LOC147804	0.216293	8.07629	2.68259	0.0114507	0.999382	-2.88001
CYP2C18	0.159185	6.92465	2.6809	0.0114978	0.999382	-2.88263
GPR35	0.192199	7.15951	2.67847	0.0115657	0.999382	-2.88638
PMFBP1	-0.151509	6.82537	-2.67783	0.011584	0.999382	-2.88738
EIF2C4	-0.175297	7.22503	-2.67719	0.0116019	0.999382	-2.88836
IQCH	-0.179417	6.93468	-2.67654	0.0116202	0.999382	-2.88937
IMPA1	-0.22496	10.112	-2.67556	0.0116479	0.999382	-2.89088
NUDT2	-0.158439	10.3432	-2.67544	0.0116513	0.999382	-2.89107
RGS18	-0.191374	9.54766	-2.67324	0.0117137	0.999382	-2.89446
LOC645485	0.156463	6.93059	2.67267	0.0117299	0.999382	-2.89535
LOC650314	-0.176277	6.94464	-2.67183	0.0117538	0.999382	-2.89664
LOC100132168	0.199967	6.95001	2.66948	0.0118211	0.999382	-2.90027
LOC400197	-0.19112	7.02472	-2.66663	0.011903	0.999382	-2.90467
RSBN1	0.16838	8.93045	2.66626	0.0119139	0.999382	-2.90525
LOC647337	0.15289	6.8746	2.66621	0.0119152	0.999382	-2.90531
LOC440563	0.179781	7.24578	2.66469	0.0119592	0.999382	-2.90766
LOC646299	-0.182742	6.9212	-2.66398	0.0119797	0.999382	-2.90875
EXOC8	-0.173737	6.98971	-2.6611	0.0120638	0.999382	-2.9132
CCDC158	-0.189127	6.76488	-2.65916	0.0121205	0.999382	-2.91618
PLCH2	0.184	6.94	2.65856	0.0121381	0.999382	-2.91711
LOC646521	0.194767	7.04467	2.65317	0.0122975	0.999382	-2.9254
C10orf125	0.164184	7.71719	2.65233	0.0123227	0.999382	-2.92671
ZNF324B	0.18617	7.63072	2.6519	0.0123356	0.999382	-2.92737
ANKMY2	0.163989	8.36	2.65184	0.0123372	0.999382	-2.92745
CPO	0.177676	6.89081	2.64724	0.0124753	0.999382	-2.93453
BTBD12	0.189098	9.05402	2.64711	0.0124791	0.999382	-2.93473
SV2A	0.181019	6.9741	2.64423	0.0125662	0.999382	-2.93915
LOC642144	0.200862	6.84673	2.644	0.0125731	0.999382	-2.9395
SNCAIP	-0.202178	6.98195	-2.64306	0.0126018	0.999382	-2.94095
DCN	0.149461	6.96679	2.64238	0.0126226	0.999382	-2.942
LOC644341	-0.225162	6.88709	-2.64083	0.0126698	0.999382	-2.94437
LOC732424	0.164068	7.00139	2.63499	0.0128495	0.999382	-2.95333
EIF5B	0.168318	8.70775	2.63404	0.0128792	0.999382	-2.95479
LOC649991	0.165155	6.90322	2.63157	0.0129561	0.999382	-2.95858
ZNF69	-0.30198	8.58748	-2.63126	0.0129656	0.999382	-2.95904
SUNC1	0.18368	6.93641	2.63119	0.0129678	0.999382	-2.95915
HOXB7	0.150426	6.78318	2.63045	0.012991	0.999382	-2.96029
HKR1	-0.170467	7.08991	-2.62956	0.013019	0.999382	-2.96166
ST7OT2	-0.152116	6.98377	-2.62893	0.0130386	0.999382	-2.96261
LOC654201	0.18898	6.87656	2.62822	0.013061	0.999382	-2.9637
IFNA1	-0.195067	6.95775	-2.62682	0.0131052	0.999382	-2.96585
C15orf5	-0.192857	6.83419	-2.62578	0.0131381	0.999382	-2.96744
HIST1H2BA	-0.20427	6.91135	-2.62538	0.0131506	0.999382	-2.96805
MIR550-2	-0.165389	7.0171	-2.62457	0.0131762	0.999382	-2.96928
FLJ39061	0.15854	7.03276	2.62446	0.0131799	0.999382	-2.96946
TANC2	-0.158138	6.91041	-2.62438	0.0131825	0.999382	-2.96959
TMEM59L	0.191726	7.24543	2.6243	0.0131849	0.999382	-2.9697
SNORD2	0.167872	6.87586	2.62358	0.0132078	0.999382	-2.97081
LOC642196	0.168773	6.85707	2.61954	0.0133368	0.999382	-2.97698
LOC651987	-0.177871	7.0419	-2.61901	0.0133539	0.999382	-2.9778
LOC100131308	-0.149491	7.02274	-2.61131	0.0136031	0.999382	-2.98955
MBNL3	-0.164179	7.1643	-2.60755	0.0137266	0.999382	-2.99529
LMOD3	-0.25474	7.64731	-2.60618	0.0137717	0.999382	-2.99737
FEM1C	0.160739	8.64979	2.6044	0.0138307	0.999382	-3.00009
KCNJ11	0.179881	6.71965	2.60239	0.0138973	0.999382	-3.00314
LOC646933	-0.166696	6.87187	-2.60237	0.013898	0.999382	-3.00317
USP18	0.268354	7.07396	2.60178	0.0139178	0.999382	-3.00408
C19orf54	0.241307	8.35239	2.60056	0.0139584	0.999382	-3.00593
TTC7A	-0.191751	7.60861	-2.59966	0.0139888	0.999382	-3.00731
LOC100133667	-0.14527	7.09817	-2.5987	0.0140209	0.999382	-3.00877
TRPV5	-0.155813	7.04998	-2.5979	0.0140478	0.999382	-3.00998
RFXAP	0.184317	8.26619	2.59525	0.0141372	0.999382	-3.01401
C19orf48	0.175222	11.7679	2.59521	0.0141384	0.999382	-3.01406
FLJ36131	-0.459097	8.64825	-2.59218	0.0142415	0.999382	-3.01868
LPHN1	0.167757	7.24266	2.5916	0.0142613	0.999382	-3.01956
TMEM211	0.192074	6.77802	2.59104	0.0142803	0.999382	-3.0204
NDNL2	0.172044	7.72751	2.59028	0.0143065	0.999382	-3.02157
LOC731787	-0.166197	6.93847	-2.58962	0.014329	0.999382	-3.02257
MIR331	-0.178103	6.98878	-2.5866	0.0144327	0.999382	-3.02715
FUS	0.194731	8.65907	2.58629	0.0144435	0.999382	-3.02762
LOC645446	-0.164801	6.94225	-2.58621	0.0144463	0.999382	-3.02775
SRXN1	0.201068	9.46444	2.586	0.0144534	0.999382	-3.02806
SIRPB1	0.185406	7.53203	2.58464	0.0145007	0.999382	-3.03013
FLJ30092	0.154919	7.15787	2.58368	0.0145339	0.999382	-3.03158
LOC100133018	-0.146651	6.91058	-2.58364	0.0145351	0.999382	-3.03163
LOC400590	-0.20733	7.02554	-2.58353	0.014539	0.999382	-3.0318
SCARNA9	-0.211114	7.71676	-2.58225	0.0145838	0.999382	-3.03376
SARDH	-0.190657	6.90427	-2.58211	0.0145886	0.999382	-3.03397
GPATCH2	0.207602	7.45437	2.57865	0.0147094	0.999382	-3.0392
MDGA1	-0.213578	6.94046	-2.57818	0.014726	0.999382	-3.03992
HIATL2	-0.281862	8.95594	-2.57463	0.0148512	0.999382	-3.04529
LOC646296	0.204405	7.03324	2.57397	0.0148747	0.999382	-3.04629
GNAT3	0.156152	6.95977	2.56494	0.0151983	0.999382	-3.05995
MPND	0.163194	7.35311	2.56453	0.015213	0.999382	-3.06056
PLXNC1	-0.160771	6.92599	-2.56419	0.0152255	0.999382	-3.06109
WWC3	-0.213811	6.91504	-2.56391	0.0152357	0.999382	-3.06151
STK32A	-0.21292	6.97525	-2.56187	0.0153096	0.999382	-3.06458
LOC389316	0.17073	6.85267	2.56118	0.015335	0.999382	-3.06564
ZNF296	0.279537	9.98553	2.56012	0.0153735	0.999382	-3.06723
LOC344741	0.170999	6.89622	2.5598	0.0153854	0.999382	-3.06771
LOC651610	0.183791	6.98905	2.55952	0.0153954	0.999382	-3.06813
LOC644111	0.158362	6.92589	2.55858	0.0154302	0.999382	-3.06956
C14orf85	-0.340954	10.22	-2.55772	0.0154616	0.999382	-3.07085
FAM105B	0.161746	8.65021	2.55612	0.0155204	0.999382	-3.07326
METTL13	0.171136	10.6691	2.55149	0.0156923	0.999382	-3.08024
SFTPA1B	-0.191543	6.81734	-2.55078	0.0157189	0.999382	-3.08132
LOC646895	0.181764	7.05796	2.54997	0.0157491	0.999382	-3.08254
EXO1	0.197766	9.71604	2.54961	0.0157624	0.999382	-3.08307
LOC653412	0.168526	6.84992	2.54908	0.0157823	0.999382	-3.08387
AMIGO3	0.140955	6.8898	2.54876	0.0157944	0.999382	-3.08436
ARFIP2	0.202429	7.13825	2.54861	0.0157999	0.999382	-3.08458
STAG3L3	-0.209971	8.48517	-2.54712	0.015856	0.999382	-3.08683
FLJ42177	0.149332	6.76462	2.54572	0.0159087	0.999382	-3.08893
ABHD6	-0.179884	7.26071	-2.54535	0.0159224	0.999382	-3.08948
LOC389983	-0.196481	6.94088	-2.54279	0.0160195	0.999382	-3.09333
LOC100133564	-0.185908	6.94822	-2.53907	0.0161614	0.999382	-3.09892
OSM	0.273442	7.55968	2.53872	0.0161749	0.999382	-3.09946
BSPRY	-0.197956	7.54802	-2.53838	0.0161879	0.999382	-3.09996
C9orf89	0.230155	8.77505	2.53658	0.0162572	0.999382	-3.10267
TMEM106A	-0.269798	7.5139	-2.53436	0.0163426	0.999382	-3.10599
C3orf41	0.174007	6.94783	2.53319	0.016388	0.999382	-3.10775
MCM3	0.179751	12.5428	2.533	0.0163954	0.999382	-3.10804
IYD	-0.156324	6.73858	-2.53291	0.016399	0.999382	-3.10818
IGSF9B	0.167634	7.07693	2.53123	0.0164643	0.999382	-3.11069
GUCA2B	-0.153473	6.99219	-2.52923	0.0165424	0.999382	-3.1137
MCTP1	0.141632	8.37711	2.52722	0.0166213	0.999382	-3.11671
LOC645336	0.174447	6.94037	2.52672	0.0166407	0.999382	-3.11745
C2orf53	0.159462	6.85905	2.52492	0.0167116	0.999382	-3.12015
ATG16L2	-0.183241	7.49007	-2.52149	0.0168475	0.999382	-3.12528
LOC100128372	-0.173628	6.91222	-2.51919	0.0169395	0.999382	-3.12873
MOSC2	-0.159245	6.81153	-2.51872	0.0169582	0.999382	-3.12943
LOC729486	-0.167215	7.23763	-2.51851	0.0169665	0.999382	-3.12974
CTRB2	-0.160507	6.9965	-2.51671	0.0170388	0.999382	-3.13243
C6orf122	0.200594	7.01935	2.51534	0.017094	0.999382	-3.13448
AIFM2	-0.164	7.03411	-2.5107	0.0172821	0.999382	-3.14141
C20orf62	-0.195858	7.09743	-2.50814	0.0173868	0.999382	-3.14524
ADAMTS10	0.178463	6.86467	2.5077	0.0174048	0.999382	-3.14589
LOC646008	-0.167456	7.08335	-2.50726	0.0174225	0.999382	-3.14654
SFRS8	0.191715	8.38023	2.50638	0.0174588	0.999382	-3.14786
PTCRA	0.18341	7.18999	2.50534	0.0175018	0.999382	-3.14941
LOC100131727	0.203988	6.99619	2.49978	0.0177322	0.999382	-3.1577
LOC646481	0.167406	7.03142	2.49821	0.0177975	0.999382	-3.16002
LOC121456	-0.175413	7.05678	-2.4976	0.0178233	0.999382	-3.16094
TTC25	-0.153262	6.80584	-2.49756	0.0178251	0.999382	-3.161
NMNAT3	-0.22143	7.87491	-2.49724	0.0178384	0.999382	-3.16148
CNNM1	0.154826	6.87649	2.49674	0.0178592	0.999382	-3.16221
TEX261	0.179679	7.96218	2.49633	0.0178765	0.999382	-3.16283
CHRNG	-0.189881	6.77941	-2.49487	0.0179377	0.999382	-3.16499
SNORA61	-0.231768	8.5056	-2.49285	0.0180234	0.999382	-3.16801
LOC338598	0.177487	6.84144	2.49225	0.0180485	0.999382	-3.16889
PRDM1	0.18789	7.47514	2.49127	0.0180902	0.999382	-3.17035
KRTAP8-1	-0.168885	6.81262	-2.48951	0.0181652	0.999382	-3.17297
BTBD9	0.162883	7.0428	2.48763	0.0182454	0.999382	-3.17576
SLC6A19	-0.170886	6.96961	-2.48731	0.018259	0.999382	-3.17623
LOC645198	-0.178222	6.96263	-2.48432	0.0183876	0.999382	-3.18067
PLD2	0.20675	7.02144	2.48384	0.0184085	0.999382	-3.18139
RIT1	0.244183	8.31354	2.48354	0.0184212	0.999382	-3.18183
ACOX2	-0.197325	7.35112	-2.48308	0.018441	0.999382	-3.18251
KRTHA5	-0.166173	6.73148	-2.48207	0.0184849	0.999382	-3.18401
C5orf22	0.182347	7.54454	2.48144	0.0185123	0.999382	-3.18495
EIF4A2	-0.207008	12.4805	-2.48134	0.0185166	0.999382	-3.18509
LOC644153	0.162957	7.12599	2.48115	0.0185247	0.999382	-3.18537
LOC646675	-0.186538	7.51426	-2.48108	0.018528	0.999382	-3.18548
LOC653689	-0.184439	7.09269	-2.48068	0.0185451	0.999382	-3.18607
HSD17B7	-0.265708	9.53583	-2.48006	0.0185723	0.999382	-3.187
LOC646023	-0.187542	7.02984	-2.47823	0.0186519	0.999382	-3.1897
LOC731950	-0.145826	8.18592	-2.47697	0.0187069	0.999382	-3.19157
LOC653746	-0.174917	6.98468	-2.47613	0.018744	0.999382	-3.19282
DBF4	0.163619	7.1675	2.47252	0.018903	0.999382	-3.19816
SLC22A14	-0.155759	6.96855	-2.47135	0.0189548	0.999382	-3.19989
LOC646280	0.167922	6.93381	2.46856	0.0190787	0.999382	-3.20401
LOC642576	-0.160435	7.0032	-2.46827	0.0190915	0.999382	-3.20444
C9orf129	0.152379	6.86984	2.46698	0.0191492	0.999382	-3.20635
LOC100128556	0.147852	7.01991	2.46559	0.0192115	0.999382	-3.2084
LOC645040	-0.175637	6.85519	-2.46256	0.0193482	0.999382	-3.21288
LOC100131510	-0.187688	7.32829	-2.45881	0.0195179	0.999382	-3.21841
LOC100133487	-0.154872	6.92067	-2.45836	0.0195386	0.999382	-3.21908
LOC650406	-0.153527	7.03157	-2.45827	0.0195426	0.999382	-3.21921
MKL1	0.190887	7.99221	2.4578	0.019564	0.999382	-3.2199
PTPN23	0.159517	7.09675	2.45724	0.0195896	0.999382	-3.22072
C10orf82	-0.180261	6.9621	-2.45693	0.0196037	0.999382	-3.22118
VGF	0.195576	7.31518	2.4552	0.019683	0.999382	-3.22373
TMEM56	0.161992	6.73305	2.45499	0.0196926	0.999382	-3.22404
FKBP9L	0.19959	7.04425	2.45445	0.0197175	0.999382	-3.22484
ZNF34	0.182567	7.89298	2.45434	0.0197227	0.999382	-3.225
LOC100128340	0.170915	6.9496	2.45401	0.0197379	0.999382	-3.22549
NAGS	0.164673	6.86855	2.45306	0.0197815	0.999382	-3.22689
LOC100132266	0.163322	7.09679	2.45254	0.0198053	0.999382	-3.22765
CYP26B1	0.192656	7.04924	2.45154	0.0198518	0.999382	-3.22913
BDH2	-0.16351	6.79053	-2.45115	0.0198695	0.999382	-3.22969
LOC100130293	0.201043	6.98176	2.44746	0.020041	0.999382	-3.23512
LOC643423	-0.171608	6.97524	-2.4474	0.0200439	0.999382	-3.23522
LOC648966	0.144548	6.96014	2.44623	0.0200985	0.999382	-3.23693
LOC642749	-0.177395	7.07233	-2.44604	0.0201073	0.999382	-3.23721
LOC652874	0.131901	6.87437	2.44591	0.0201135	0.999382	-3.23741
IL18R1	0.149959	6.90259	2.44581	0.0201184	0.999382	-3.23756
LOC642812	0.149912	7.35127	2.44571	0.0201229	0.999382	-3.2377
SCN1A	-0.167982	6.98463	-2.44438	0.0201854	0.999382	-3.23966
PTGS2	0.171619	7.52162	2.44369	0.0202177	0.999382	-3.24067
TMEM179	0.16264	6.79755	2.44291	0.0202546	0.999382	-3.24182
RXFP4	0.168081	6.99205	2.44125	0.0203328	0.999382	-3.24426
MAPK8	-0.148189	7.19075	-2.44023	0.0203808	0.999382	-3.24575
CCDC61	0.205779	7.18496	2.44005	0.0203895	0.999382	-3.24602
LOC100128729	-0.149237	6.9918	-2.43974	0.0204042	0.999382	-3.24647
MIR589	-0.179672	6.84546	-2.43896	0.0204413	0.999382	-3.24762
C1orf170	0.159511	7.15196	2.4376	0.0205059	0.999382	-3.24961
SART3	0.180554	7.55986	2.43665	0.0205511	0.999382	-3.251
POLR1E	0.164431	10.9706	2.4365	0.0205584	0.999382	-3.25123
FABP3	0.148409	6.82037	2.43647	0.0205597	0.999382	-3.25127
LOC648001	-0.165415	6.91541	-2.43645	0.0205609	0.999382	-3.25131
VN1R1	-0.188197	6.9251	-2.4361	0.0205773	0.999382	-3.25181
ACCS	0.19232	7.23519	2.43529	0.0206161	0.999382	-3.253
BCAS3	-0.152087	6.79082	-2.435	0.0206301	0.999382	-3.25343
ART3	-0.156178	6.90813	-2.43448	0.0206549	0.999382	-3.25419
LOC728809	-0.40401	9.68693	-2.43398	0.0206789	0.999382	-3.25492
LOC441087	-0.30659	10.922	-2.43384	0.0206857	0.999382	-3.25513
LHX8	0.169903	6.73871	2.42832	0.0209522	0.999382	-3.26321
LOC729272	-0.175067	7.68956	-2.42794	0.0209707	0.999382	-3.26377
SIX2	0.162427	7.17371	2.42679	0.0210268	0.999382	-3.26546
LOC727900	0.131113	7.07334	2.42601	0.0210648	0.999382	-3.2666
MIR635	-0.227771	7.01887	-2.42462	0.0211325	0.999382	-3.26862
HSPB6	0.183497	6.91156	2.42188	0.0212671	0.999382	-3.27263
FAM119A	-0.262088	9.78418	-2.42152	0.021285	0.999382	-3.27316
STXBP1	0.179367	7.03074	2.421	0.0213105	0.999382	-3.27392
MOSPD2	0.144376	7.65404	2.42072	0.0213246	0.999382	-3.27433
HOXB3	-0.173	6.91886	-2.42037	0.0213419	0.999382	-3.27485
LOC285733	-0.147621	6.9533	-2.42028	0.0213461	0.999382	-3.27497
LOC647008	-0.205658	6.88851	-2.4197	0.0213747	0.999382	-3.27582
C3orf34	-0.321692	9.45154	-2.41897	0.0214112	0.999382	-3.27689
CAPS2	-0.203191	7.58045	-2.41804	0.021457	0.999382	-3.27824
RIMS1	0.144492	6.78182	2.41744	0.0214869	0.999382	-3.27912
BIRC3	-0.23137	7.29115	-2.41736	0.0214911	0.999382	-3.27925
LOC650475	0.157538	6.90249	2.41703	0.0215073	0.999382	-3.27972
DEFB103A	-0.175166	6.79529	-2.41667	0.0215252	0.999382	-3.28024
LOC341356	-0.164587	6.91216	-2.41577	0.0215702	0.999382	-3.28156
LOC390551	0.170385	6.93178	2.41566	0.0215754	0.999382	-3.28172
SNRNP200	0.164565	7.62188	2.41491	0.0216132	0.999382	-3.28282
SLC25A44	0.159105	9.28337	2.4141	0.0216534	0.999382	-3.28399
OR2T1	-0.165653	6.96139	-2.41398	0.0216594	0.999382	-3.28417
RNASE10	0.16804	7.30057	2.41375	0.0216711	0.999382	-3.28451
LOC653182	0.181454	6.92876	2.41366	0.0216755	0.999382	-3.28464
UFSP1	0.154737	6.8573	2.41334	0.0216917	0.999382	-3.28511
COL2A1	-0.15982	7.00784	-2.41237	0.0217404	0.999382	-3.28652
LUZP5	-0.171575	6.85869	-2.41224	0.0217469	0.999382	-3.28671
CSNK1A1L	-0.148208	6.99731	-2.41137	0.0217905	0.999382	-3.28798
C2	0.167129	6.99171	2.41093	0.0218126	0.999382	-3.28862
LAIR2	-0.154088	8.17905	-2.41074	0.0218222	0.999382	-3.28889
LOC652674	0.156832	6.91304	2.41049	0.0218349	0.999382	-3.28926
PRDM16	0.134555	7.08951	2.41016	0.0218517	0.999382	-3.28975
NIPBL	0.154513	8.35234	2.40983	0.0218682	0.999382	-3.29022
LOC649406	0.192783	6.8778	2.4089	0.0219155	0.999382	-3.29159
LOC100129719	0.184353	6.97983	2.4062	0.0220525	0.999382	-3.29552
LOC650346	-0.16642	6.99584	-2.40608	0.0220583	0.999382	-3.29568
LOC100133744	-0.147535	7.13191	-2.40431	0.0221488	0.999382	-3.29827
DNAJC9	0.165551	11.4206	2.40405	0.0221622	0.999382	-3.29865
ARMC8	0.18074	7.91054	2.40325	0.0222032	0.999382	-3.29981
LOC400804	0.15448	6.86379	2.40322	0.0222047	0.999382	-3.29986
RPUSD4	0.123605	11.312	2.40274	0.0222291	0.999382	-3.30055
LOC728940	0.141742	6.86032	2.40141	0.0222976	0.999382	-3.30249
ATP5B	0.143421	14.6078	2.39961	0.0223902	0.999382	-3.3051
TREML2	-0.212544	7.13209	-2.39856	0.0224445	0.999382	-3.30663
BRF2	0.204805	9.3966	2.39706	0.0225223	0.999382	-3.30881
LOC729830	0.143741	6.86034	2.39653	0.0225495	0.999382	-3.30957
APBA1	-0.19424	6.97051	-2.39626	0.0225635	0.999382	-3.30997
LOC100130667	-0.15368	7.05419	-2.39562	0.0225971	0.999382	-3.31091
LOC653093	0.153278	6.95201	2.39498	0.0226302	0.999382	-3.31183
DRAM1	-0.169738	8.27375	-2.39492	0.0226331	0.999382	-3.31191
LOC648927	0.158211	7.6015	2.39432	0.0226647	0.999382	-3.31279
LOC651979	0.165144	7.02896	2.39347	0.022709	0.999382	-3.31402
GFPT1	0.176208	7.8655	2.39211	0.02278	0.999382	-3.31599
LOC100130357	-0.192907	6.90231	-2.39106	0.0228354	0.999382	-3.31752
GAB4	0.158204	6.9505	2.39002	0.0228903	0.999382	-3.31903
C21orf136	0.156408	7.06039	2.38981	0.0229008	0.999382	-3.31932
ICA1	-0.246939	7.81441	-2.38919	0.0229339	0.999382	-3.32023
LOC642866	-0.146273	6.922	-2.38917	0.0229349	0.999382	-3.32026
LOC100128035	-0.148485	6.96504	-2.38895	0.0229462	0.999382	-3.32057
CHST2	0.221051	7.29124	2.38885	0.0229517	0.999382	-3.32072
LEF1	-0.144611	7.00867	-2.38816	0.0229884	0.999382	-3.32173
ARGFXP2	0.167088	7.00638	2.3879	0.0230017	0.999382	-3.32209
C22orf23	0.144048	6.91809	2.38689	0.0230553	0.999382	-3.32356
RNFT2	-0.165652	7.83012	-2.38661	0.0230703	0.999382	-3.32397
ERCC-00136	0.150001	6.83843	2.3866	0.0230708	0.999382	-3.32398
JMJD6	0.154286	7.64038	2.38594	0.0231059	0.999382	-3.32494
ZNF564	0.184954	7.81616	2.38591	0.0231073	0.999382	-3.32498
OR5M8	0.186289	7.03107	2.38524	0.0231432	0.999382	-3.32596
DNAJB4	0.164598	7.29892	2.38469	0.0231722	0.999382	-3.32675
FAM90A10	0.157001	6.9532	2.38428	0.0231941	0.999382	-3.32735
BEND7	-0.184037	7.35117	-2.38345	0.0232383	0.999382	-3.32854
LOC283874	-0.152949	6.97462	-2.38302	0.0232615	0.999382	-3.32917
NDST3	0.182811	6.94181	2.38231	0.0232991	0.999382	-3.33019
RNASE12	-0.147389	6.78556	-2.38203	0.0233141	0.999382	-3.3306
LOC100132439	0.156262	7.36574	2.38161	0.0233369	0.999382	-3.33121
NEUROD2	-0.162211	7.01649	-2.38123	0.0233569	0.999382	-3.33175
LOC100129480	0.164669	6.9269	2.38106	0.023366	0.999382	-3.332
UBC	0.193799	14.5066	2.3805	0.0233965	0.999382	-3.33282
MIRLET7E	-0.162894	6.83131	-2.38036	0.0234036	0.999382	-3.33301
TMEM150C	-0.174858	7.00322	-2.37909	0.0234723	0.999382	-3.33486
SCHIP1	0.1576	6.8319	2.37781	0.0235413	0.999382	-3.33671
LOC730378	0.17651	6.93739	2.37591	0.0236442	0.999382	-3.33945
PRR13	0.144329	13.8911	2.3759	0.0236447	0.999382	-3.33947
ZSCAN22	0.144275	7.13417	2.37582	0.0236487	0.999382	-3.33958
NTM	0.158731	7.04624	2.37561	0.0236603	0.999382	-3.33988
ZNF561	0.167883	7.33271	2.37547	0.023668	0.999382	-3.34009
LOC648625	0.178461	6.82006	2.37479	0.0237051	0.999382	-3.34108
LOC729919	0.157412	6.90009	2.37466	0.0237116	0.999382	-3.34125
LRRC7	0.168026	6.93096	2.37363	0.0237681	0.999382	-3.34275
LOC642950	-0.190387	6.98068	-2.3731	0.0237966	0.999382	-3.3435
LOC653905	0.126985	6.95312	2.37286	0.0238101	0.999382	-3.34386
CBR3	-0.214186	7.41865	-2.3728	0.0238135	0.999382	-3.34395
TCN1	0.146778	6.7762	2.37155	0.0238816	0.999382	-3.34575
EFCAB6	0.141201	7.10102	2.37089	0.0239175	0.999382	-3.3467
LOC647149	0.155639	6.91403	2.3704	0.0239445	0.999382	-3.34741
FAM197Y2	-0.167942	6.92517	-2.37029	0.0239508	0.999382	-3.34757
PSMD2	0.165495	10.69	2.37013	0.0239593	0.999382	-3.3478
SETD6	0.167095	7.6872	2.36838	0.0240554	0.999382	-3.35032
TBC1D21	0.155255	7.06736	2.36528	0.0242271	0.999382	-3.3548
LOC442480	0.137227	6.8514	2.3652	0.0242311	0.999382	-3.3549
UTS2R	0.153238	6.98491	2.3644	0.0242758	0.999382	-3.35606
BIRC6	-0.177231	7.99694	-2.36343	0.0243298	0.999382	-3.35746
LNX1	0.159896	6.80468	2.36326	0.0243391	0.999382	-3.3577
CDC42SE2	-0.20062	9.16358	-2.36324	0.0243402	0.999382	-3.35773
VCX	0.184087	6.88383	2.36213	0.0244019	0.999382	-3.35932
DNAH6	-0.150894	6.94544	-2.36179	0.0244214	0.999382	-3.35982
KRT18P17	-0.140582	6.945	-2.35969	0.0245388	0.999382	-3.36284
LOC731017	-0.178115	6.93673	-2.35965	0.0245407	0.999382	-3.36289
LOC100129716	-0.157601	7.28315	-2.35808	0.0246292	0.999382	-3.36516
LOC399900	-0.330857	10.537	-2.35668	0.0247079	0.999382	-3.36717
FAHD2A	-0.23479	7.45588	-2.35662	0.0247113	0.999382	-3.36725
KIAA0565	-0.163066	7.04619	-2.35602	0.0247451	0.999382	-3.36812
WHAMM	0.171189	7.56276	2.3555	0.0247746	0.999382	-3.36887
N4BP1	0.152793	7.52805	2.35526	0.0247884	0.999382	-3.36921
CCNI2	-0.187861	7.25514	-2.35497	0.0248045	0.999382	-3.36962
SIK3	-0.143517	8.59399	-2.35463	0.0248239	0.999382	-3.37012
C9orf43	-0.127518	6.93195	-2.35441	0.0248362	0.999382	-3.37043
LOC441066	0.155788	7.04262	2.3543	0.0248427	0.999382	-3.37059
ZMAT3	-0.287091	10.7138	-2.35423	0.0248466	0.999382	-3.37069
LOC139542	0.167675	6.91326	2.35404	0.0248574	0.999382	-3.37097
TMEM101	-0.142542	10.0172	-2.35366	0.0248789	0.999382	-3.37151
TMED4	-0.177218	9.22792	-2.35265	0.0249362	0.999382	-3.37296
LOC729516	-0.141486	6.84994	-2.3521	0.0249679	0.999382	-3.37376
AP3S2	0.159674	7.4721	2.3506	0.0250534	0.999382	-3.37591
LOC649327	0.157568	6.93545	2.35052	0.0250576	0.999382	-3.37601
OSBP	0.174402	10.4496	2.34919	0.0251342	0.999382	-3.37793
KLKP1	-0.144673	6.73308	-2.34635	0.0252972	0.999382	-3.382
ARL16	-0.305201	9.69203	-2.34582	0.0253281	0.999382	-3.38277
PWRN2	-0.163298	6.93389	-2.34561	0.0253398	0.999382	-3.38306
TNFSF9	0.213955	8.14615	2.3447	0.0253927	0.999382	-3.38437
ZNF426	0.168547	7.09109	2.34465	0.0253955	0.999382	-3.38444
ABCB4	0.141552	6.94714	2.34396	0.0254353	0.999382	-3.38543
LOC645276	0.143185	7.02347	2.3436	0.0254562	0.999382	-3.38594
LOC643002	0.156937	6.88507	2.34132	0.0255885	0.999382	-3.3892
EFHC2	-0.147896	6.769	-2.33742	0.0258171	0.999382	-3.3948
RIMS4	-0.19144	7.14173	-2.33671	0.0258586	0.999382	-3.39581
C1orf55	0.184099	9.29633	2.33667	0.0258608	0.999382	-3.39586
LOC441368	0.169638	6.92337	2.33334	0.0260577	0.999382	-3.40063
LOC441495	-0.161865	6.90328	-2.33317	0.0260674	0.999382	-3.40086
LOC643665	-0.166206	7.15666	-2.33176	0.0261514	0.999382	-3.40289
C15orf40	-0.187906	7.6152	-2.32994	0.0262596	0.999382	-3.40548
MAT2A	-0.146424	11.5317	-2.32938	0.0262931	0.999382	-3.40628
LOC100129828	-0.147448	8.00729	-2.32909	0.0263105	0.999382	-3.4067
VGLL1	-0.162038	7.05393	-2.32753	0.0264034	0.999382	-3.40892
FAM160A1	0.148728	7.00754	2.32564	0.0265171	0.999382	-3.41162
UTY	-0.160719	7.37962	-2.32546	0.026528	0.999382	-3.41187
H2AFB1	0.145386	6.98314	2.3248	0.0265675	0.999382	-3.41281
TFF1	0.136273	6.82374	2.32435	0.0265949	0.999382	-3.41346
LRMP	-0.187858	9.21152	-2.3218	0.026749	0.999382	-3.41709
DTNA	0.205383	9.46042	2.31994	0.0268622	0.999382	-3.41974
GUCY1B3	0.165832	6.87665	2.31979	0.0268715	0.999382	-3.41996
LOC100130849	-0.169052	6.87745	-2.31962	0.0268818	0.999382	-3.4202
LOC731827	0.17027	6.98777	2.31942	0.026894	0.999382	-3.42048
SIRT7	-0.184327	8.00152	-2.3193	0.0269009	0.999382	-3.42065
LOC391859	-0.151224	7.03898	-2.31905	0.0269165	0.999382	-3.42101
YWHAG	0.176013	11.122	2.31851	0.0269494	0.999382	-3.42178
GSTTP1	0.149969	6.93338	2.31838	0.0269571	0.999382	-3.42196
OKL38	0.368063	8.90987	2.31829	0.0269628	0.999382	-3.42209
LOC647147	0.13432	6.89209	2.31782	0.0269916	0.999382	-3.42276
C15orf38	0.160363	7.00079	2.31775	0.0269958	0.999382	-3.42286
RAD51AP2	0.143999	6.89958	2.31773	0.0269968	0.999382	-3.42288
TBC1D10A	0.163738	7.15597	2.31758	0.0270061	0.999382	-3.4231
PTEN	0.144924	9.79555	2.31688	0.027049	0.999382	-3.42409
POLL	0.140021	7.05235	2.31656	0.0270685	0.999382	-3.42455
LOC100128510	-0.186035	7.62603	-2.31582	0.0271142	0.999382	-3.42561
PEX5L	-0.130409	7.04548	-2.31415	0.0272166	0.999382	-3.42797
LOC728012	0.14998	7.00105	2.31381	0.0272378	0.999382	-3.42846
LOC653313	-0.166191	7.07174	-2.31284	0.0272974	0.999382	-3.42984
MFAP1	0.159845	9.55395	2.31257	0.0273141	0.999382	-3.43022
LOC653137	-0.166584	6.94562	-2.31146	0.0273828	0.999382	-3.4318
FLJ32065	-0.16845	7.01905	-2.31131	0.0273919	0.999382	-3.43201
MIR376B	-0.149857	6.9103	-2.31063	0.0274345	0.999382	-3.43298
LOC440978	0.171379	6.96991	2.31023	0.0274589	0.999382	-3.43354
SLC9A10	-0.191994	6.95351	-2.30956	0.0275006	0.999382	-3.4345
CDKN1A	0.312227	12.3653	2.30815	0.0275886	0.999382	-3.4365
SPRR4	-0.15314	6.99232	-2.30617	0.0277122	0.999382	-3.43931
LOC644165	-0.157042	6.8531	-2.30515	0.0277762	0.999382	-3.44076
LOC647998	-0.146689	6.84674	-2.30371	0.027867	0.999382	-3.4428
LOC649897	0.150802	7.1932	2.30357	0.0278753	0.999382	-3.44299
MAML1	0.162241	7.23214	2.30109	0.0280322	0.999382	-3.44651
UQCR	-0.164375	8.48544	-2.30046	0.028072	0.999382	-3.4474
ZNF549	-0.358377	9.90156	-2.30037	0.0280779	0.999382	-3.44754
KRT18P34	0.146407	7.03041	2.30018	0.0280898	0.999382	-3.4478
RAD18	-0.188296	7.12401	-2.3001	0.0280946	0.999382	-3.44791
ABCB11	0.142862	6.96458	2.29991	0.0281071	0.999382	-3.44819
NT5C1A	-0.149763	6.92128	-2.29849	0.0281969	0.999382	-3.45019
GUCY1B2	-0.153744	6.93297	-2.29778	0.0282421	0.999382	-3.4512
STAMBPL1	-0.19202	8.23361	-2.29765	0.0282508	0.999382	-3.45139
LOC731658	0.15166	6.96207	2.29665	0.028314	0.999382	-3.45279
UPF1	0.154382	8.50101	2.2959	0.0283625	0.999382	-3.45387
LOC642568	0.137166	6.84354	2.29579	0.028369	0.999382	-3.45401
KCNIP4	0.141225	7.10016	2.29552	0.0283864	0.999382	-3.45439
LOC149224	-0.145625	6.9719	-2.29443	0.0284561	0.999382	-3.45593
C14orf166B	-0.171795	7.06525	-2.29369	0.0285036	0.999382	-3.45698
APLF	0.135422	7.12878	2.29341	0.0285216	0.999382	-3.45738
MTRF1	-0.163042	8.24887	-2.29179	0.0286259	0.999382	-3.45967
LOC644021	-0.157433	6.96688	-2.29147	0.0286467	0.999382	-3.46012
TCAP	0.169592	6.78981	2.29015	0.0287321	0.999382	-3.46199
NR1H4	0.170041	6.82163	2.28986	0.0287508	0.999382	-3.4624
LOC100130934	0.179157	7.22882	2.28985	0.0287511	0.999382	-3.4624
LOC100130065	-0.154995	6.83107	-2.28952	0.0287726	0.999382	-3.46287
CBY1	0.176681	7.4859	2.2893	0.028787	0.999382	-3.46319
LOC651401	-0.178506	6.97032	-2.2891	0.0288001	0.999382	-3.46347
LOC100132686	-0.159813	6.8639	-2.28788	0.0288793	0.999382	-3.46519
LOC652349	-0.14437	6.94482	-2.28779	0.0288848	0.999382	-3.46531
PRR12	-0.174993	6.99105	-2.28552	0.0290332	0.999382	-3.46853
STAT2	-0.203538	9.22763	-2.28478	0.0290814	0.999382	-3.46957
A3GALT2	0.128836	6.95132	2.284	0.0291323	0.999382	-3.47066
LOC650761	-0.147461	6.90068	-2.28363	0.0291566	0.999382	-3.47119
TPRX1	-0.156042	6.75934	-2.28361	0.029158	0.999382	-3.47122
LOC644048	0.143511	6.8886	2.2834	0.0291715	0.999382	-3.47151
AGXT	0.141889	6.94831	2.28277	0.029213	0.999382	-3.4724
ST6GALNAC4	-0.170074	7.82954	-2.28254	0.0292282	0.999382	-3.47272
FLJ45244	0.135479	7.39316	2.28114	0.0293204	0.999382	-3.4747
CA12	0.137844	6.96006	2.27886	0.0294707	0.999382	-3.4779
LOC644088	-0.12673	6.88838	-2.27762	0.0295529	0.999382	-3.47965
LOC729839	-0.146211	6.96441	-2.27753	0.0295587	0.999382	-3.47977
LOC642340	-0.210401	7.04093	-2.27731	0.0295734	0.999382	-3.48009
SLC25A24	0.253048	8.04416	2.27705	0.0295905	0.999382	-3.48045
EVC2	-0.140887	6.77308	-2.27702	0.0295929	0.999382	-3.4805
LOC643492	0.144993	6.97023	2.2765	0.0296275	0.999382	-3.48123
SNORD1A	-0.159443	7.22542	-2.27649	0.0296282	0.999382	-3.48125
LOC646145	0.133529	7.06322	2.27595	0.0296638	0.999382	-3.482
LOC641922	-0.146019	7.09824	-2.27582	0.0296725	0.999382	-3.48218
MRPL52	-0.160403	10.9651	-2.2752	0.0297136	0.999382	-3.48305
CCK	-0.138301	6.93398	-2.27459	0.0297548	0.999382	-3.48392
LOC642669	0.128498	6.85803	2.27457	0.0297557	0.999382	-3.48394
LOC643341	-0.171006	6.96301	-2.27416	0.0297833	0.999382	-3.48452
LOC652708	-0.152113	6.90221	-2.27404	0.0297913	0.999382	-3.48469
LOC644732	-0.136919	6.89609	-2.27373	0.0298119	0.999382	-3.48512
LOC647805	0.157903	7.08712	2.27224	0.0299121	0.999382	-3.48722
LRRC37A2	0.172662	6.93197	2.27158	0.0299563	0.999382	-3.48815
SULT4A1	0.124634	6.94586	2.27155	0.0299579	0.999382	-3.48818
LOC642759	-0.147608	7.0388	-2.27103	0.0299929	0.999382	-3.48891
AHSA2	-0.164833	7.8542	-2.27063	0.0300204	0.999382	-3.48949
LOC651881	0.150653	6.9777	2.27049	0.0300296	0.999382	-3.48968
PSEN2	0.155814	7.04078	2.26901	0.0301292	0.999382	-3.49176
LOC100130211	-0.154461	6.88918	-2.26833	0.0301748	0.999382	-3.4927
TTYH3	0.203482	8.29122	2.26801	0.0301965	0.999382	-3.49315
KRTAP19-1	0.139605	6.83094	2.2679	0.030204	0.999382	-3.49331
RLF	0.180364	7.90097	2.26758	0.0302261	0.999382	-3.49377
MIR199A2	-0.182863	6.89297	-2.26743	0.0302364	0.999382	-3.49398
LOC644136	-0.156146	6.87373	-2.26603	0.0303311	0.999382	-3.49594
OR13A1	0.131407	6.85602	2.26489	0.0304088	0.999382	-3.49754
LOC646304	-0.170045	6.99231	-2.26485	0.0304111	0.999382	-3.49759
NME6	-0.164067	8.46756	-2.26474	0.030419	0.999382	-3.49775
DEFA6	0.134986	6.84087	2.2646	0.0304284	0.999382	-3.49795
C17orf55	0.135838	6.94788	2.26449	0.0304358	0.999382	-3.4981
PDGFC	-0.150102	7.2094	-2.26277	0.0305532	0.999382	-3.50051
SNORD42B	-0.147979	6.9868	-2.26275	0.0305547	0.999382	-3.50054
SLC19A3	-0.154716	6.97736	-2.2622	0.030592	0.999382	-3.5013
DKFZp451A211	0.136522	6.943	2.26172	0.0306251	0.999382	-3.50198
SH3BP4	0.125551	6.89163	2.26111	0.0306667	0.999382	-3.50283
GPER	-0.144614	7.11493	-2.26028	0.030724	0.999382	-3.504
LOC642316	0.157154	6.82704	2.26006	0.0307392	0.999382	-3.50431
ADAM28	-0.131549	6.93418	-2.25957	0.0307729	0.999382	-3.505
PRF1	-0.152298	6.96421	-2.25919	0.0307991	0.999382	-3.50553
ZNF682	-0.339604	8.68526	-2.25798	0.0308823	0.999382	-3.50722
GCKR	-0.152462	6.98024	-2.25756	0.0309111	0.999382	-3.5078
PLCL4	0.155595	6.98285	2.25682	0.0309624	0.999382	-3.50884
ERCC-00046	0.161181	6.71272	2.25604	0.0310164	0.999382	-3.50993
LOC642678	0.160511	7.03654	2.25449	0.0311237	0.999382	-3.51209
LOC388955	-0.189554	7.08127	-2.2541	0.0311512	0.999382	-3.51265
LOC650257	-0.169695	7.06969	-2.2537	0.031179	0.999382	-3.51321
CHRNA5	-0.235817	8.37159	-2.25319	0.0312144	0.999382	-3.51392
COG8	0.177292	7.52609	2.25213	0.0312887	0.999382	-3.5154
LOC647630	0.161515	6.99611	2.25182	0.0313101	0.999382	-3.51583
LOC100134241	-0.124189	6.89027	-2.25103	0.0313652	0.999382	-3.51693
C1orf187	0.169648	7.01943	2.25094	0.0313715	0.999382	-3.51706
LOC390564	0.127135	6.85109	2.25023	0.0314212	0.999382	-3.51805
C6orf186	-0.143791	6.88528	-2.25003	0.0314356	0.999382	-3.51834
RARRES2	-0.213726	6.96748	-2.25002	0.0314361	0.999382	-3.51835
WIPF2	-0.177554	7.07938	-2.24992	0.0314433	0.999382	-3.51849
WDR43	0.16587	8.8463	2.24924	0.0314907	0.999382	-3.51943
KRTAP1-3	-0.157502	6.77567	-2.24918	0.0314952	0.999382	-3.51952
LOC729277	0.172414	6.90291	2.24903	0.0315055	0.999382	-3.51973
FLJ12331	0.160188	6.97204	2.2489	0.0315148	0.999382	-3.51991
C9orf7	0.15854	7.25537	2.2487	0.0315292	0.999382	-3.5202
LOC100131565	0.127132	6.9623	2.24848	0.0315447	0.999382	-3.5205
LOC643451	0.165242	7.026	2.2484	0.0315498	0.999382	-3.52061
CAV3	0.177486	7.00306	2.248	0.031578	0.999382	-3.52116
ILDR1	0.147391	7.03921	2.24766	0.0316019	0.999382	-3.52164
MAGT1	-0.280886	8.12659	-2.24619	0.0317055	0.999382	-3.52369
C14orf169	0.134346	9.62394	2.24333	0.0319086	0.999382	-3.52768
LOC650914	-0.155801	6.9638	-2.24271	0.0319525	0.999382	-3.52854
MGC13098	-0.141445	6.94239	-2.24012	0.0321378	0.999382	-3.53216
LOC653340	0.130648	6.90846	2.23994	0.0321507	0.999382	-3.53241
LOC196752	-0.162596	7.28011	-2.23961	0.032174	0.999382	-3.53286
CDKN2AIPNL	-0.368229	10.5446	-2.23922	0.0322019	0.999382	-3.53341
LOC649151	0.133061	6.9258	2.23893	0.0322227	0.999382	-3.53381
LOC100134796	0.150549	6.94416	2.23832	0.0322664	0.999382	-3.53466
POM121L1P	-0.139508	6.9237	-2.23687	0.0323706	0.999382	-3.53667
DAP3	0.160759	11.4547	2.23634	0.0324087	0.999382	-3.53741
NCRNA00119	-0.144979	7.02157	-2.23619	0.0324198	0.999382	-3.53762
TCF23	0.162108	7.13535	2.23613	0.0324241	0.999382	-3.53771
C7orf65	-0.149451	7.03551	-2.23584	0.0324451	0.999382	-3.53811
RBPMS	0.156267	7.05567	2.23473	0.0325249	0.999382	-3.53965
IL22	0.154122	6.95337	2.23446	0.0325444	0.999382	-3.54002
LOC391578	-0.166385	9.35804	-2.23426	0.0325593	0.999382	-3.54031
CDK5	-0.171089	8.78006	-2.23393	0.0325832	0.999382	-3.54077
FLJ46154	-0.138693	6.90991	-2.23234	0.0326983	0.999382	-3.54297
GPR115	0.148195	6.77008	2.2323	0.0327015	0.999382	-3.54303
LOC641953	0.153411	7.12084	2.2321	0.0327161	0.999382	-3.54331
ZNF165	0.150134	7.86388	2.23122	0.0327799	0.999382	-3.54453
C8orf83	-0.15855	7.84673	-2.22996	0.0328718	0.999382	-3.54628
FAM115A	-0.31292	11.7625	-2.22954	0.0329025	0.999382	-3.54686
HSD3B1	0.167635	6.97164	2.2286	0.0329712	0.999382	-3.54817
FAM73A	-0.239926	7.56471	-2.22827	0.0329951	0.999382	-3.54862
LOC100130696	0.180439	7.05485	2.22624	0.0331442	0.999382	-3.55144
MIR1251	0.144716	6.95363	2.22525	0.0332174	0.999382	-3.55282
GCOM1	-0.122842	6.94213	-2.2252	0.033221	0.999382	-3.55288
TCL6	0.163734	7.14276	2.2222	0.0334427	0.999382	-3.55704
RUNDC2A	-0.166952	7.01051	-2.22193	0.0334629	0.999382	-3.55742
DRD1IP	-0.14924	6.78862	-2.22183	0.03347	0.999382	-3.55755
LOC100130298	0.158974	7.07521	2.22012	0.0335975	0.999382	-3.55993
RADIL	0.143491	6.93161	2.21999	0.0336071	0.999382	-3.5601
USP1	0.196532	10.0919	2.21989	0.0336142	0.999382	-3.56024
LOC728789	0.143177	6.97115	2.21889	0.033689	0.999382	-3.56162
LOC100131702	-0.185409	6.87765	-2.21811	0.0337469	0.999382	-3.5627
LOC649784	0.153174	6.91357	2.21756	0.0337882	0.999382	-3.56346
POTEH	0.15493	6.91378	2.21698	0.0338318	0.999382	-3.56427
GPR133	0.168051	6.83292	2.21657	0.0338626	0.999382	-3.56484
LOC654135	0.138065	7.13508	2.21628	0.0338845	0.999382	-3.56524
LOC387939	-0.131167	6.91686	-2.21615	0.0338938	0.999382	-3.56541
ANKRD44	0.134053	6.9737	2.21585	0.0339163	0.999382	-3.56583
C21orf87	-0.132323	6.92795	-2.21581	0.0339192	0.999382	-3.56588
NCOA6	0.178776	9.37965	2.21553	0.033941	0.999382	-3.56628
PLSCR2	-0.172088	6.83024	-2.21521	0.0339647	0.999382	-3.56672
MED22	0.171394	9.94354	2.21473	0.034001	0.999382	-3.56738
C19orf55	-0.138122	6.78892	-2.21445	0.0340218	0.999382	-3.56776
LOC100130604	-0.171767	6.95737	-2.21445	0.0340218	0.999382	-3.56776
KRTAP3-2	0.145259	7.04125	2.21286	0.0341414	0.999382	-3.56996
GGTLC2	0.144995	6.79405	2.21265	0.0341577	0.999382	-3.57025
SNORD18C	-0.148164	6.85629	-2.21238	0.0341779	0.999382	-3.57062
DUSP2	0.153304	8.24482	2.21165	0.0342336	0.999382	-3.57164
TMCO3	-0.131252	8.32134	-2.20994	0.0343632	0.999382	-3.574
PDLIM3	0.160994	7.01486	2.20968	0.0343825	0.999382	-3.57435
FAM19A1	0.15969	6.70104	2.20834	0.0344849	0.999382	-3.57621
HNRNPUL1	-0.169748	7.73732	-2.2082	0.0344955	0.999382	-3.5764
LOC650454	-0.15988	6.92953	-2.20748	0.0345499	0.999382	-3.57738
USP37	0.153042	7.81287	2.20587	0.034673	0.999382	-3.5796
LOC389031	0.127998	6.96315	2.2056	0.034694	0.999382	-3.57998
LOC650869	-0.119895	6.84157	-2.20547	0.0347038	0.999382	-3.58016
MGC51338	-0.139281	6.91966	-2.20379	0.0348333	0.999382	-3.58248
LOC650095	0.156574	7.01454	2.20333	0.0348683	0.999382	-3.58311
LOC100128423	0.182967	7.12901	2.20315	0.034882	0.999382	-3.58335
LOC729372	0.181349	7.06836	2.20282	0.0349076	0.999382	-3.58381
PEBP4	0.157373	6.90921	2.20276	0.0349124	0.999382	-3.5839
LOC100129878	-0.157814	7.0849	-2.20231	0.0349469	0.999382	-3.58451
FAM36A	0.162441	8.77101	2.20169	0.0349948	0.999382	-3.58537
BTBD1	0.123652	8.99612	2.20112	0.0350389	0.999382	-3.58615
PSORS1C2	-0.145634	6.96023	-2.20073	0.0350693	0.999382	-3.5867
XPNPEP3	-0.238667	12.4827	-2.19876	0.035222	0.999382	-3.58941
SLC2A14	0.146476	6.90391	2.19867	0.0352283	0.999382	-3.58952
CCDC36	0.153974	7.01686	2.19763	0.0353094	0.999382	-3.59095
LOC100131768	-0.142827	6.92218	-2.1975	0.0353193	0.999382	-3.59113
GRWD1	0.160623	10.6077	2.19709	0.0353519	0.999382	-3.5917
CCRL1	0.131606	7.06673	2.1963	0.0354128	0.999382	-3.59278
LRRC4C	-0.149153	6.89575	-2.19597	0.0354393	0.999382	-3.59324
LOC641761	0.162613	6.97214	2.19549	0.0354767	0.999382	-3.5939
LOC729392	0.145139	6.95012	2.19458	0.035548	0.999382	-3.59515
NSUN5B	0.170515	8.25231	2.19408	0.0355871	0.999382	-3.59584
ERAP1	-0.161218	7.29866	-2.19381	0.0356084	0.999382	-3.59621
NIPSNAP3A	-0.166377	9.18886	-2.19308	0.0356653	0.999382	-3.59721
LOC100132738	0.127704	7.08777	2.19303	0.0356691	0.999382	-3.59727
LOC651007	0.144794	6.97316	2.19302	0.0356696	0.999382	-3.59728
P2RY6	0.178635	8.8252	2.19224	0.0357314	0.999382	-3.59836
LOC100133422	-0.158271	6.98912	-2.19168	0.0357752	0.999382	-3.59913
HNRPM	0.137196	13.0101	2.19142	0.0357959	0.999382	-3.59949
NOMO1	0.163846	8.36989	2.19125	0.0358094	0.999382	-3.59972
LOC100134819	0.132857	6.99313	2.19121	0.0358123	0.999382	-3.59977
C19orf23	0.152343	7.02834	2.19074	0.0358493	0.999382	-3.60042
LOC643327	0.143625	6.927	2.19056	0.0358637	0.999382	-3.60067
LOC653650	-0.142794	7.14374	-2.19021	0.035891	0.999382	-3.60114
TRIM68	0.138078	8.23692	2.18993	0.0359135	0.999382	-3.60153
LOC441799	-0.140483	6.91363	-2.1898	0.0359239	0.999382	-3.60171
LIPE	-0.143303	6.95089	-2.18962	0.0359384	0.999382	-3.60196
PIGA	0.141694	9.21704	2.18938	0.0359569	0.999382	-3.60228
SYNGR1	-0.173683	8.19517	-2.189	0.035987	0.999382	-3.60281
LOC100128505	-0.358815	11.5717	-2.18869	0.0360119	0.999382	-3.60324
FLJ36031	-0.158794	6.90076	-2.18866	0.0360142	0.999382	-3.60328
LOC100132276	0.111896	6.83376	2.18849	0.0360274	0.999382	-3.60351
C1orf151	-0.161305	8.44222	-2.1872	0.0361296	0.999382	-3.60527
LOC651886	0.146354	7.00478	2.18704	0.0361424	0.999382	-3.60549
LOC440905	-0.155631	7.14791	-2.18694	0.0361508	0.999382	-3.60564
FLJ34503	0.135482	6.97626	2.18688	0.0361554	0.999382	-3.60572
ZC3H12D	-0.158811	6.96154	-2.18579	0.0362419	0.999382	-3.60721
SNORD44	0.15955	6.92257	2.1846	0.0363368	0.999382	-3.60884
C6orf208	-0.138025	6.94428	-2.18452	0.0363431	0.999382	-3.60895
LOC643614	0.15987	7.02465	2.18449	0.0363455	0.999382	-3.60899
FLRT1	0.152692	6.974	2.18379	0.0364016	0.999382	-3.60995
WDR21C	-0.147318	6.87439	-2.18343	0.0364306	0.999382	-3.61044
ERCC-00073	0.129927	6.77682	2.18316	0.036452	0.999382	-3.61081
FBXO27	-0.133179	6.81057	-2.18257	0.0364992	0.999382	-3.61162
LOC730417	-0.171445	8.3515	-2.18218	0.0365309	0.999382	-3.61216
GAB2	0.138477	8.82394	2.18092	0.0366316	0.999382	-3.61387
LOC644468	-0.161094	6.8922	-2.18087	0.036636	0.999382	-3.61395
ZNF267	0.143891	6.939	2.18043	0.0366713	0.999382	-3.61455
LOC647334	0.129411	6.87703	2.17997	0.0367082	0.999382	-3.61517
LOC100134201	-0.140673	6.98091	-2.17937	0.0367563	0.999382	-3.61599
LOC100127905	0.140164	6.9377	2.1789	0.0367946	0.999382	-3.61664
C1orf147	0.152294	7.00453	2.17862	0.0368169	0.999382	-3.61702
LOC646269	0.157826	6.85136	2.17849	0.0368281	0.999382	-3.61721
S100A16	0.130705	6.87477	2.17803	0.0368646	0.999382	-3.61782
PNLIPRP1	-0.13661	6.81451	-2.17764	0.0368967	0.999382	-3.61836
EXOC3L	-0.145124	6.96432	-2.17752	0.0369064	0.999382	-3.61853
ENAH	0.164116	6.97471	2.17666	0.0369759	0.999382	-3.6197
EHHADH	0.17076	7.77255	2.17659	0.0369812	0.999382	-3.61979
LOC100132763	0.143369	7.03761	2.17641	0.0369962	0.999382	-3.62004
EXD2	-0.129784	8.00068	-2.1752	0.0370944	0.999382	-3.62169
LOC126235	-0.131147	7.20174	-2.1743	0.0371681	0.999382	-3.62293
LOC732387	0.140908	6.98126	2.17384	0.0372054	0.999382	-3.62356
LOC729809	0.145071	6.83776	2.1735	0.0372328	0.999382	-3.62401
GUSBL1	-0.160528	9.30004	-2.17331	0.0372486	0.999382	-3.62428
KIAA1409	-0.144573	6.93819	-2.17282	0.0372886	0.999382	-3.62495
NAIF1	0.162725	7.66134	2.17252	0.0373131	0.999382	-3.62535
LOC100131131	-0.15595	6.92066	-2.17246	0.0373181	0.999382	-3.62544
KRTAP21-3	0.133824	6.85651	2.17236	0.037326	0.999382	-3.62557
LOC100131460	0.169429	7.1862	2.17224	0.0373358	0.999382	-3.62573
YDD19	-0.138201	6.97289	-2.1715	0.0373967	0.999382	-3.62675
LOC260339	0.1232	7.0563	2.17102	0.0374362	0.999382	-3.62741
P2RX5	0.143025	6.96692	2.17002	0.037518	0.999382	-3.62877
LOC255025	-0.155687	7.09546	-2.16952	0.037559	0.999382	-3.62945
FBN2	0.127066	7.02127	2.16932	0.0375752	0.999382	-3.62971
C10orf141	-0.127019	6.90212	-2.16855	0.0376386	0.999382	-3.63076
LOC649191	0.147561	6.86628	2.16833	0.0376567	0.999382	-3.63106
MIR1912	-0.14238	6.87834	-2.16816	0.0376714	0.999382	-3.63131
RBCK1	0.137988	9.49721	2.16774	0.0377056	0.999382	-3.63187
LOC440888	-0.157556	6.96168	-2.16768	0.0377106	0.999382	-3.63195
C20orf179	0.164376	6.78033	2.16742	0.0377321	0.999382	-3.63231
LOC283398	0.136474	6.90996	2.16717	0.0377529	0.999382	-3.63265
SC4MOL	-0.193997	10.3729	-2.16684	0.0377802	0.999382	-3.6331
FUCA2	0.202679	9.23877	2.16626	0.0378279	0.999382	-3.63389
LOC652783	-0.147802	6.85992	-2.16582	0.0378644	0.999382	-3.63449
EPHA1	0.145318	7.45123	2.16545	0.0378949	0.999382	-3.63499
CIDECP	0.154336	7.18982	2.16435	0.0379866	0.999382	-3.63649
LOC732343	0.138319	6.80464	2.16428	0.0379925	0.999382	-3.63659
KCNH6	-0.321185	11.1157	-2.16424	0.0379957	0.999382	-3.63664
LOC92017	-0.152593	6.78748	-2.16401	0.038015	0.999382	-3.63696
SH2D2A	-0.173095	7.20522	-2.16362	0.0380475	0.999382	-3.63749
LOC652839	-0.13218	6.96165	-2.16334	0.0380705	0.999382	-3.63787
C14orf143	0.146422	8.17703	2.16324	0.038079	0.999382	-3.638
LOC653801	0.146278	6.92111	2.16313	0.0380878	0.999382	-3.63815
RHOB	0.147837	7.0299	2.16297	0.0381009	0.999382	-3.63836
NDUFB1	0.159859	7.29339	2.16281	0.0381143	0.999382	-3.63858
LOC643031	-0.196794	10.5167	-2.16219	0.0381663	0.999382	-3.63943
MIR152	0.139058	6.88687	2.16196	0.0381859	0.999382	-3.63975
ATG9A	-0.117222	8.20093	-2.16192	0.038189	0.999382	-3.6398
LOC652522	0.170337	6.8701	2.16189	0.0381911	0.999382	-3.63984
ZFYVE26	0.133488	8.10771	2.16012	0.0383391	0.999382	-3.64224
WIT1	0.165995	7.51253	2.16	0.0383498	0.999382	-3.64242
LOC389765	-0.20183	7.31024	-2.15954	0.0383882	0.999382	-3.64304
GGTLC1	-0.140241	7.23374	-2.15891	0.0384406	0.999382	-3.64389
SSTR3	0.143676	7.00024	2.15802	0.0385153	0.999382	-3.6451
TRHDE	0.147319	6.95554	2.15694	0.0386061	0.999382	-3.64656
TMEM16D	-0.180123	6.90114	-2.15602	0.0386842	0.999382	-3.64782
LOC728080	0.129608	7.01055	2.15597	0.0386883	0.999382	-3.64788
CD1C	0.16632	7.04503	2.15519	0.0387539	0.999382	-3.64894
MBLAC1	-0.137798	7.06003	-2.15313	0.0389287	0.999382	-3.65174
FLJ14213	0.131967	7.07534	2.15294	0.0389451	0.999382	-3.652
SF3B4	0.179549	11.6845	2.15266	0.038969	0.999382	-3.65238
SCARF2	-0.160462	6.93915	-2.15257	0.0389761	0.999382	-3.65249
MYBPC2	-0.128141	6.71053	-2.15234	0.0389957	0.999382	-3.65281
RAPGEFL1	-0.14206	6.9847	-2.15232	0.0389973	0.999382	-3.65283
NAT8L	0.156471	6.98552	2.15223	0.0390052	0.999382	-3.65296
RNF24	0.15068	9.72867	2.15188	0.0390351	0.999382	-3.65343
LOC730262	-0.141173	7.06802	-2.1518	0.0390417	0.999382	-3.65354
POLD4	-0.181226	7.95299	-2.1518	0.0390421	0.999382	-3.65355
SGCD	-0.133586	6.97948	-2.15162	0.039057	0.999382	-3.65378
ZNF121	0.132655	6.81327	2.15158	0.0390611	0.999382	-3.65385
THAP2	-0.133293	7.09646	-2.15081	0.0391267	0.999382	-3.65489
MRLC2	-0.110244	12.3271	-2.15015	0.0391828	0.999382	-3.65578
C1orf100	-0.157673	7.28988	-2.15009	0.0391879	0.999382	-3.65586
RBM15	0.140689	9.68998	2.14936	0.0392502	0.999382	-3.65685
C8orf17	-0.120232	6.92243	-2.14925	0.0392596	0.999382	-3.657
LOC651575	-0.136571	8.11606	-2.14822	0.0393476	0.999382	-3.65839
REEP4	0.176687	7.91592	2.14805	0.039362	0.999382	-3.65862
TMEM138	0.170671	9.38735	2.14744	0.0394147	0.999382	-3.65945
IFNK	-0.155502	6.8834	-2.14706	0.0394477	0.999382	-3.65997
MRC1L1	-0.128435	6.73611	-2.14634	0.039509	0.999382	-3.66094
EPHA5	-0.135078	6.94347	-2.14531	0.0395975	0.999382	-3.66233
PLEKHG6	0.142601	6.94439	2.14522	0.0396059	0.999382	-3.66246
TMEM91	0.170142	8.30796	2.14504	0.0396214	0.999382	-3.6627
CAPNS2	0.174233	6.8968	2.14502	0.0396228	0.999382	-3.66273
LOC642888	-0.153088	6.90041	-2.14482	0.03964	0.999382	-3.66299
ST13	-0.17622	9.99344	-2.14456	0.0396628	0.999382	-3.66335
KLHL24	-0.189072	8.2972	-2.14397	0.0397135	0.999382	-3.66415
LOC650494	0.143605	6.93318	2.14367	0.0397392	0.999382	-3.66455
FLII	-0.14787	8.03781	-2.14358	0.0397476	0.999382	-3.66468
CRYBA2	-0.151244	7.10706	-2.14334	0.0397677	0.999382	-3.66499
LOC642530	-0.170051	6.94405	-2.14205	0.0398796	0.999382	-3.66674
LOC649826	-0.146923	7.06353	-2.1416	0.0399187	0.999382	-3.66735
ZAP70	0.124527	7.07219	2.14152	0.0399262	0.999382	-3.66747
LMAN2	-0.220823	8.4126	-2.14081	0.0399872	0.999382	-3.66841
LOC645963	0.154537	6.98842	2.14004	0.0400541	0.999382	-3.66945
ALPP	-0.293181	9.07683	-2.13996	0.0400617	0.999382	-3.66957
CASQ1	0.152251	6.98396	2.13907	0.040139	0.999382	-3.67077
DKFZP434B061	0.135424	6.98685	2.13902	0.0401433	0.999382	-3.67083
LOC440706	-0.145625	6.94318	-2.139	0.0401456	0.999382	-3.67087
GYPB	0.137099	6.76468	2.13695	0.0403244	0.999382	-3.67363
DKFZp761O2018	-0.139043	6.98135	-2.13685	0.0403335	0.999382	-3.67377
MIR1293	0.130184	6.91787	2.13657	0.0403576	0.999382	-3.67414
LAPTM4A	-0.147197	8.17561	-2.13648	0.0403654	0.999382	-3.67426
LOC649162	0.128125	6.85662	2.13599	0.040409	0.999382	-3.67493
LOC651809	-0.140261	6.91017	-2.13502	0.0404938	0.999382	-3.67624
LOC732450	-0.172342	6.99815	-2.13433	0.0405544	0.999382	-3.67716
LOC728747	-0.163662	6.93016	-2.13369	0.0406108	0.999382	-3.67803
LOC648354	0.130911	6.80149	2.13333	0.0406425	0.999382	-3.67851
PILRB	-0.156392	7.87364	-2.13307	0.0406658	0.999382	-3.67887
C1orf161	-0.114468	6.997	-2.13291	0.0406796	0.999382	-3.67908
PNMAL2	-0.168289	6.92077	-2.13282	0.0406881	0.999382	-3.67921
LOC652850	-0.153121	7.06335	-2.13242	0.0407228	0.999382	-3.67974
LOC649200	0.145719	6.97941	2.13239	0.0407258	0.999382	-3.67978
FLJ46380	-0.164566	6.89879	-2.13174	0.040783	0.999382	-3.68066
CEP110	0.136333	8.12696	2.13168	0.0407884	0.999382	-3.68074
LOC651630	0.153199	6.92829	2.13139	0.0408138	0.999382	-3.68112
PRND	0.147477	6.77127	2.1299	0.0409462	0.999382	-3.68314
CYP4F11	-0.150472	6.90838	-2.12921	0.0410078	0.999382	-3.68407
OR51A4	0.122093	6.79902	2.12869	0.041054	0.999382	-3.68477
RPS15A	-0.134323	14.629	-2.12841	0.0410787	0.999382	-3.68514
CCDC55	0.160614	7.86872	2.12666	0.0412352	0.999382	-3.6875
ZNF829	-0.115999	7.00477	-2.12587	0.0413058	0.999382	-3.68856
PDF	0.183365	7.41625	2.12542	0.041346	0.999382	-3.68917
GHR	-0.124568	6.73167	-2.12395	0.0414782	0.999382	-3.69115
SLC6A9	-0.136202	7.0709	-2.12365	0.0415045	0.999382	-3.69154
RNMTL1	0.170016	10.7181	2.12315	0.0415496	0.999382	-3.69222
EIF3B	0.158821	12.984	2.12249	0.0416093	0.999382	-3.69311
LCN10	0.145077	6.8557	2.1224	0.041617	0.999382	-3.69322
LOC649139	0.131975	7.01548	2.12217	0.0416377	0.999382	-3.69353
LOC100130233	0.181234	7.19573	2.12182	0.0416697	0.999382	-3.69401
LOC390880	0.171551	6.89988	2.12159	0.0416904	0.999382	-3.69432
LOC284260	-0.145194	6.92311	-2.12128	0.0417184	0.999382	-3.69473
IFITM1	0.131649	6.87697	2.12117	0.0417284	0.999382	-3.69488
PRR10	0.155831	6.9403	2.12029	0.0418077	0.999382	-3.69606
PATZ1	0.131924	7.07519	2.11963	0.0418677	0.999382	-3.69695
LOC650038	0.143559	6.96856	2.11962	0.0418686	0.999382	-3.69696
LOC652593	-0.136866	6.85307	-2.1195	0.0418795	0.999382	-3.69712
CCNJ	-0.168939	7.1354	-2.11759	0.0420523	0.999382	-3.69968
LOC100134674	0.12454	6.87238	2.11735	0.0420746	0.999382	-3.70001
CRISP3	0.141491	6.74012	2.11727	0.0420821	0.999382	-3.70012
LOC100131301	0.137218	6.76872	2.11725	0.0420837	0.999382	-3.70014
RASSF1	0.129976	9.34401	2.11692	0.0421138	0.999382	-3.70058
BGLAP	0.137821	7.13635	2.11604	0.0421934	0.999382	-3.70176
LOC730978	0.127026	6.97939	2.11566	0.0422289	0.999382	-3.70228
LOC653436	-0.199524	7.00883	-2.11555	0.0422385	0.999382	-3.70242
HEXDC	-0.157121	7.51219	-2.11505	0.0422837	0.999382	-3.70308
ERCC-00143	-0.115709	6.80782	-2.11495	0.0422937	0.999382	-3.70323
MIR128-2	-0.145511	7.08425	-2.11394	0.0423854	0.999382	-3.70457
RMI1	0.134161	9.85316	2.11375	0.0424034	0.999382	-3.70483
LOC100131138	0.124657	6.86527	2.11353	0.042423	0.999382	-3.70512
VIPR1	-0.130974	7.15064	-2.11277	0.0424933	0.999382	-3.70615
HSPD1	0.126006	13.9101	2.11275	0.0424951	0.999382	-3.70618
LOC644074	0.144982	6.92151	2.11169	0.0425926	0.999382	-3.7076
SPANXN1	0.156495	6.71854	2.11113	0.0426439	0.999382	-3.70834
PIWIL3	0.13731	6.71204	2.10971	0.0427746	0.999382	-3.71024
STAP2	-0.142701	7.09169	-2.109	0.04284	0.999382	-3.71119
OR7A17	-0.126628	6.86763	-2.1086	0.0428767	0.999382	-3.71172
LOC728955	0.13145	6.98387	2.10851	0.042886	0.999382	-3.71185
TREX1	-0.132332	7.10171	-2.1085	0.0428867	0.999382	-3.71186
ZBTB37	-0.130975	6.91875	-2.10832	0.0429033	0.999382	-3.7121
FAM131C	-0.137584	6.99754	-2.10826	0.0429085	0.999382	-3.71218
MIR1274A	0.123745	6.96535	2.10824	0.0429105	0.999382	-3.71221
PREX1	-0.185423	7.41021	-2.10781	0.0429504	0.999382	-3.71278
PM20D1	0.125745	7.08369	2.10776	0.0429549	0.999382	-3.71285
LOC100132377	-0.120511	6.98112	-2.10771	0.0429592	0.999382	-3.71291
NOC3L	0.179868	9.84198	2.10694	0.0430311	0.999382	-3.71395
ZNF420	-0.151879	7.0164	-2.10679	0.0430448	0.999382	-3.71414
KRTAP5-2	0.111613	6.71408	2.10649	0.0430731	0.999382	-3.71455
FOSL2	0.157748	7.47734	2.10604	0.0431142	0.999382	-3.71514
FAM134B	0.118393	6.98884	2.10598	0.0431201	0.999382	-3.71523
SLC15A2	-0.138234	6.91554	-2.10506	0.0432053	0.999382	-3.71645
LOC653111	0.137132	7.10639	2.10496	0.0432153	0.999382	-3.71659
CYP1A1	-0.170376	6.91131	-2.10464	0.0432451	0.999382	-3.71702
C5orf21	-0.147312	9.29837	-2.10461	0.0432481	0.999382	-3.71706
ZFAND6	-0.150875	9.35054	-2.10445	0.043263	0.999382	-3.71728
SUV39H1	0.122707	10.6681	2.10405	0.0433001	0.999382	-3.71781
LOC652698	-0.149875	7.18922	-2.10386	0.0433181	0.999382	-3.71807
MIR524	-0.149006	6.87967	-2.10381	0.0433225	0.999382	-3.71813
LOC100128074	-0.120787	7.02858	-2.10339	0.0433616	0.999382	-3.71869
C9orf128	-0.141971	6.77387	-2.10231	0.0434625	0.999382	-3.72013
SNAI2	-0.122978	7.00622	-2.10196	0.0434951	0.999382	-3.72059
NBPF16	-0.138007	6.88067	-2.10187	0.0435034	0.999382	-3.72071
CLTB	0.128278	10.6119	2.10172	0.0435178	0.999382	-3.72092
ERCC-00054	-0.139191	6.77947	-2.10111	0.0435746	0.999382	-3.72172
C1orf156	0.147934	8.03623	2.10083	0.0436015	0.999382	-3.72211
NHSL2	0.144432	7.41906	2.10058	0.0436252	0.999382	-3.72244
RDX	0.153196	8.15557	2.10011	0.0436689	0.999382	-3.72306
SLAMF9	0.138319	7.12055	2.09945	0.0437309	0.999382	-3.72394
LOC390561	-0.123368	6.98814	-2.09903	0.0437711	0.999382	-3.72451
LOC651789	-0.136589	6.85055	-2.09783	0.0438839	0.999382	-3.72611
LOC402382	0.147141	6.96211	2.09768	0.0438983	0.999382	-3.72631
C2orf82	-0.171976	6.98455	-2.09746	0.043919	0.999382	-3.7266
MIR1979	-0.155449	6.913	-2.09717	0.0439467	0.999382	-3.72699
RSHL3	-0.123584	7.00566	-2.09681	0.0439801	0.999382	-3.72746
LOC643261	0.154312	6.93068	2.09664	0.043996	0.999382	-3.72769
NIPAL4	0.127088	7.15549	2.09658	0.0440017	0.999382	-3.72777
GOLGA9P	-0.207243	7.46388	-2.09632	0.044027	0.999382	-3.72812
LOC651467	0.127864	6.83536	2.09621	0.0440372	0.999382	-3.72827
MED30	-0.122518	11.396	-2.09534	0.0441193	0.999382	-3.72942
FAM99A	-0.144453	6.88502	-2.09519	0.0441334	0.999382	-3.72962
OR14J1	-0.129635	6.80089	-2.09377	0.0442689	0.999382	-3.73152
DUXAP3	-0.301048	9.47693	-2.09285	0.0443567	0.999382	-3.73274
C1orf135	0.157537	8.50319	2.0925	0.0443902	0.999382	-3.73321
SORT1	0.145722	8.48618	2.09152	0.0444836	0.999382	-3.73451
PNLIP	-0.121702	6.80858	-2.09105	0.0445279	0.999382	-3.73513
TM7SF2	-0.137792	8.27688	-2.09054	0.0445767	0.999382	-3.73581
MXRA8	-0.154152	7.03272	-2.08917	0.0447079	0.999382	-3.73762
LGALS7	-0.156687	6.9135	-2.08894	0.0447308	0.999382	-3.73794
ANKRD55	-0.173138	6.91184	-2.08893	0.0447311	0.999382	-3.73795
LOC653589	-0.146757	6.88118	-2.08762	0.0448578	0.999382	-3.7397
DIO3	-0.189986	7.10133	-2.08712	0.044906	0.999382	-3.74036
GPR21	-0.1187	6.94505	-2.08686	0.0449308	0.999382	-3.7407
C14orf153	-0.232306	8.87601	-2.08666	0.0449499	0.999382	-3.74097
SLC16A3	0.152908	11.7812	2.08617	0.0449972	0.999382	-3.74162
C21orf55	-0.290333	11.434	-2.0861	0.0450036	0.999382	-3.7417
MED14	-0.126683	8.06017	-2.08609	0.0450045	0.999382	-3.74172
LOC196549	-0.142019	6.95924	-2.08582	0.0450312	0.999382	-3.74208
SP3	0.134873	9.11457	2.08544	0.0450675	0.999382	-3.74258
LOC646561	0.121577	7.02773	2.08537	0.0450741	0.999382	-3.74267
TMEM17	-0.27169	9.1993	-2.08519	0.0450921	0.999382	-3.74292
TNRC4	0.139573	6.93906	2.08447	0.0451618	0.999382	-3.74388
LOC646981	0.132291	7.10719	2.08391	0.0452158	0.999382	-3.74462
EPB49	-0.15058	6.86941	-2.08373	0.0452335	0.999382	-3.74486
OR9G4	-0.137721	6.75579	-2.08338	0.0452674	0.999382	-3.74532
LOC392459	0.172547	6.98976	2.08248	0.0453548	0.999382	-3.74651
LOC644931	-0.172132	7.30193	-2.08234	0.0453683	0.999382	-3.7467
MIR494	0.139784	6.88302	2.08226	0.0453762	0.999382	-3.74681
ANKRD26	0.164515	7.24262	2.08225	0.0453771	0.999382	-3.74682
MRPL49	0.129317	8.48919	2.08196	0.0454054	0.999382	-3.7472
SNORD6	-0.141875	7.5688	-2.08168	0.0454328	0.999382	-3.74758
LOC400464	0.140304	7.62387	2.08154	0.0454462	0.999382	-3.74776
JOSD1	0.119586	8.6333	2.08143	0.0454568	0.999382	-3.7479
SMAD5	0.18085	8.14653	2.08141	0.0454584	0.999382	-3.74793
DNHL1	0.12658	6.99146	2.08047	0.0455509	0.999382	-3.74918
ERCC-00138	0.138536	6.81082	2.08016	0.0455811	0.999382	-3.74959
RNF121	0.15016	8.95795	2.07979	0.0456167	0.999382	-3.75008
FABP7	-0.141094	6.9225	-2.07952	0.0456433	0.999382	-3.75044
KCTD21	0.132404	7.12541	2.07941	0.0456537	0.999382	-3.75058
AHCTF1	0.124578	8.91574	2.07941	0.0456541	0.999382	-3.75058
C1orf51	-0.146372	6.80332	-2.07906	0.0456886	0.999382	-3.75105
MIR200A	-0.15543	6.92506	-2.07892	0.0457023	0.999382	-3.75124
FLJ10213	-0.167138	7.6144	-2.0789	0.0457036	0.999382	-3.75125
FER1L5	-0.124637	7.06112	-2.07847	0.0457464	0.999382	-3.75183
PEX10	-0.15326	7.07184	-2.07842	0.0457508	0.999382	-3.75189
MADCAM1	0.135427	6.93479	2.07786	0.0458059	0.999382	-3.75264
LGALS9C	0.12037	6.76411	2.07762	0.0458293	0.999382	-3.75295
NONO	0.121326	12.681	2.07692	0.0458976	0.999382	-3.75387
GPR173	0.12481	6.93202	2.07642	0.0459475	0.999382	-3.75454
NGEF	0.136719	7.0122	2.0762	0.0459686	0.999382	-3.75483
TGS1	0.16438	7.62508	2.07567	0.0460207	0.999382	-3.75553
CCDC125	-0.192325	8.37301	-2.07559	0.0460285	0.999382	-3.75563
C20orf29	0.147796	9.01648	2.07529	0.0460584	0.999382	-3.75604
BTBD10	0.142541	8.63979	2.07486	0.046101	0.999382	-3.75661
TMEM194	-0.137505	8.5261	-2.07442	0.0461443	0.999382	-3.75719
LOC651285	0.130366	6.9505	2.07421	0.0461649	0.999382	-3.75746
FLJ16734	0.1251	6.88117	2.07406	0.0461799	0.999382	-3.75766
LOC644704	0.153995	6.89004	2.07265	0.0463197	0.999382	-3.75953
LOC100128485	-0.161844	7.19425	-2.07221	0.0463632	0.999382	-3.76011
DCT	-0.115448	6.77948	-2.07215	0.0463692	0.999382	-3.76019
CEACAM21	0.135773	7.29623	2.07193	0.0463906	0.999382	-3.76048
MIR210	-0.124399	6.88312	-2.07129	0.046454	0.999382	-3.76132
SH3PXD2A	-0.142491	6.85251	-2.07123	0.0464597	0.999382	-3.7614
HBG2	-0.202924	7.03017	-2.07118	0.0464647	0.999382	-3.76146
ATRN	0.130936	8.00573	2.07022	0.0465609	0.999382	-3.76274
DEFB135	-0.151369	6.76628	-2.06971	0.0466113	0.999382	-3.76341
FIS1	-0.170057	10.7941	-2.06855	0.0467269	0.999382	-3.76494
C16orf52	-0.121752	7.47562	-2.06853	0.0467286	0.999382	-3.76496
LOC400968	-0.140479	6.91836	-2.06852	0.0467303	0.999382	-3.76499
LOC254398	0.136098	6.91539	2.06803	0.0467786	0.999382	-3.76563
C6orf163	-0.168078	7.15013	-2.06608	0.0469744	0.999382	-3.76821
ENPP4	-0.130308	6.72267	-2.06524	0.0470582	0.999382	-3.76931
LOC649987	0.135559	6.8787	2.06452	0.047131	0.999382	-3.77026
LOC100129660	0.126125	7.1553	2.06435	0.0471474	0.999382	-3.77048
LOC100132476	0.127594	6.86541	2.06429	0.0471539	0.999382	-3.77056
VCPIP1	0.150578	9.21936	2.06425	0.0471579	0.999382	-3.77062
LOC402562	0.133262	7.00435	2.06412	0.0471707	0.999382	-3.77078
RAX	-0.181738	6.90629	-2.06386	0.047197	0.999382	-3.77113
MEPCE	0.201524	10.1085	2.06373	0.0472099	0.999382	-3.7713
ASGR1	-0.149392	6.88006	-2.06368	0.047215	0.999382	-3.77136
BBS10	-0.142113	7.35321	-2.06368	0.0472152	0.999382	-3.77137
KDM1B	-0.129493	7.08581	-2.06328	0.0472559	0.999382	-3.7719
FOXO6	-0.129634	7.16166	-2.0629	0.0472942	0.999382	-3.7724
EIF2C3	0.136567	7.32033	2.06193	0.0473917	0.999382	-3.77367
TOX	-0.136309	6.79183	-2.06169	0.0474162	0.999382	-3.77399
FAM72A	0.159121	7.81529	2.06105	0.0474803	0.999382	-3.77482
LOC649951	-0.167312	6.93156	-2.06044	0.0475426	0.999382	-3.77563
ELP3	0.152783	10.797	2.06043	0.0475434	0.999382	-3.77564
ZNF117	-0.128325	6.83742	-2.06039	0.0475473	0.999382	-3.77569
CP	-0.157175	6.80839	-2.0603	0.0475569	0.999382	-3.77582
CRLF2	-0.127567	7.0979	-2.06018	0.0475692	0.999382	-3.77598
KIAA1600	-0.164164	8.27154	-2.05884	0.0477047	0.999382	-3.77774
LOC285943	-0.136667	7.20539	-2.05847	0.0477424	0.999382	-3.77822
TRMU	0.168381	7.50671	2.05776	0.0478148	0.999382	-3.77916
HMHB1	0.143332	6.96779	2.05752	0.047839	0.999382	-3.77947
BTD	-0.15243	7.72361	-2.05743	0.0478482	0.999382	-3.77959
C21orf126	-0.165724	7.70629	-2.05713	0.0478789	0.999382	-3.77999
ITGB1BP2	0.140297	6.94461	2.05678	0.0479149	0.999382	-3.78045
LOC127406	0.120986	6.93162	2.05663	0.0479297	0.999382	-3.78064
ITGB6	-0.150441	6.72964	-2.05647	0.0479461	0.999382	-3.78085
C6orf188	0.131998	6.85779	2.05569	0.0480263	0.999382	-3.78188
GAPDH	0.139411	14.2988	2.05466	0.0481316	0.999382	-3.78324
AMMECR1L	0.129751	8.05141	2.05459	0.0481391	0.999382	-3.78333
LOC649365	-0.160393	7.51117	-2.05427	0.0481717	0.999382	-3.78375
ERCC-00031	-0.156366	6.7449	-2.05398	0.0482014	0.999382	-3.78413
SLC45A4	0.147816	9.04823	2.05221	0.0483826	0.999382	-3.78645
LOC728661	-0.228183	10.1985	-2.05221	0.0483832	0.999382	-3.78645
ZDHHC14	-0.160299	7.56154	-2.05171	0.0484342	0.999382	-3.7871
LOC100133576	0.125523	6.96234	2.0515	0.0484558	0.999382	-3.78738
ZBTB34	0.130982	8.13354	2.05135	0.048472	0.999382	-3.78758
NTF3	0.144939	6.8904	2.05095	0.0485126	0.999382	-3.7881
FLJ40453	0.187543	7.15129	2.05089	0.0485188	0.999382	-3.78818
GOT2	0.162801	10.8496	2.05084	0.0485239	0.999382	-3.78824
SNORA73A	-0.149628	7.5483	-2.05062	0.0485471	0.999382	-3.78854
LOC341346	-0.200181	7.018	-2.05031	0.0485786	0.999382	-3.78894
ZNF385C	-0.141638	7.0046	-2.05029	0.0485814	0.999382	-3.78898
LOC100129278	-0.132649	6.93109	-2.0489	0.0487251	0.999382	-3.7908
LOC442208	0.123079	6.84143	2.0488	0.0487355	0.999382	-3.79093
NPM1	-0.124163	6.94136	-2.04775	0.0488435	0.999382	-3.7923
LOC645279	-0.124061	6.86946	-2.04683	0.0489393	0.999382	-3.7935
LOC652701	-0.120867	6.92782	-2.0467	0.048953	0.999382	-3.79368
MRPL4	-0.190744	8.9774	-2.04644	0.0489799	0.999382	-3.79402
MRGPRG	0.147569	6.91999	2.04617	0.0490078	0.999382	-3.79437
RNU105A	-0.163496	7.46386	-2.04608	0.0490174	0.999382	-3.79449
LOC646887	0.120155	7.02576	2.04526	0.049103	0.999382	-3.79556
LOH12CR2	0.119164	6.96079	2.04503	0.0491267	0.999382	-3.79586
LOC643328	0.124231	6.90009	2.04488	0.049143	0.999382	-3.79607
LOC651481	-0.155282	6.93807	-2.04467	0.0491645	0.999382	-3.79634
LRRC4B	0.116001	6.96783	2.04349	0.0492879	0.999382	-3.79788
RLBP1	0.141868	6.97465	2.0434	0.049297	0.999382	-3.798
LOC100129988	-0.177144	7.03097	-2.04331	0.0493064	0.999382	-3.79811
DOLPP1	0.17208	8.55536	2.04286	0.0493538	0.999382	-3.79871
NSMCE2	-0.145045	9.91263	-2.04279	0.0493607	0.999382	-3.79879
GRIPAP1	-0.245754	8.50731	-2.04239	0.0494033	0.999382	-3.79932
LOC647843	-0.176794	7.02405	-2.0423	0.0494119	0.999382	-3.79943
RFNG	-0.158046	8.66241	-2.04188	0.0494562	0.999382	-3.79998
OR52A1	0.117599	6.69586	2.03893	0.049767	0.999382	-3.80385
LOC647910	-0.15308	7.07154	-2.03876	0.049785	0.999382	-3.80407
LOC390298	0.14404	8.24084	2.03834	0.0498287	0.999382	-3.80461
LOC100132429	0.134095	6.85199	2.03807	0.0498576	0.999382	-3.80497
LOC402508	0.160879	6.95847	2.03676	0.0499965	0.999382	-3.80668
SRGAP3	-0.137321	7.04372	-2.03669	0.0500039	0.999382	-3.80677
ACSS3	-0.12717	6.92202	-2.03657	0.0500166	0.999382	-3.80693
LOC100134728	-0.208367	10.109	-2.03648	0.0500259	0.999382	-3.80705
EIF2AK4	-0.189918	7.71589	-2.03635	0.05004	0.999382	-3.80722
MAN2C1	-0.16314	7.29507	-2.03626	0.0500497	0.999382	-3.80734
PACRGL	-0.12376	7.014	-2.03611	0.0500648	0.999382	-3.80752
VDR	0.130734	7.38661	2.03571	0.0501072	0.999382	-3.80805
CYP2R1	-0.161831	7.76223	-2.03556	0.0501239	0.999382	-3.80825
TMIGD2	0.16327	6.96449	2.03548	0.0501324	0.999382	-3.80836
LOC641693	0.163586	6.97892	2.03534	0.0501471	0.999382	-3.80854
FLJ20209	0.132871	7.03346	2.03492	0.0501912	0.999382	-3.80908
PVRL4	0.119071	6.79834	2.03354	0.0503386	0.999382	-3.81088
LOC441070	-0.124863	6.92598	-2.0335	0.0503424	0.999382	-3.81093
LOC641955	0.117993	6.97059	2.03341	0.0503519	0.999382	-3.81105
LOC647309	-0.135989	6.9771	-2.0332	0.050375	0.999382	-3.81133
LOC643905	-0.157346	7.19713	-2.03309	0.0503861	0.999382	-3.81147
RAB32	-0.174222	9.88811	-2.03269	0.0504293	0.999382	-3.81199
ERCC-00109	-0.126338	6.75563	-2.03242	0.0504581	0.999382	-3.81234
C19orf71	0.186738	7.11771	2.03203	0.0504991	0.999382	-3.81285
LOC647704	-0.135296	6.91616	-2.03186	0.0505173	0.999382	-3.81307
ZNF619	-0.12619	6.96651	-2.03168	0.0505371	0.999382	-3.81331
ACOX3	0.153741	8.81962	2.03137	0.0505699	0.999382	-3.81371
IFRG15	0.141327	7.0109	2.02891	0.0508335	0.999382	-3.81691
DEFB132	0.120356	6.8387	2.0287	0.0508565	0.999382	-3.81719
C17orf57	0.149977	6.8294	2.02824	0.0509057	0.999382	-3.81779
LOC100133390	-0.191053	9.58727	-2.02819	0.0509113	0.999382	-3.81785
HSPB8	0.115299	6.83182	2.02793	0.0509389	0.999382	-3.81819
FLJ45079	0.121871	6.99497	2.02768	0.0509663	0.999382	-3.81852
LOC729397	-0.145362	7.04546	-2.0269	0.0510504	0.999382	-3.81953
RRN3P2	0.135685	7.07625	2.02611	0.0511354	0.999382	-3.82056
LOC652768	-0.159666	6.90484	-2.02515	0.0512389	0.999382	-3.8218
LOC402360	0.138078	6.92987	2.02507	0.0512484	0.999382	-3.82192
SNORA7A	-0.137248	7.08119	-2.02492	0.0512643	0.999382	-3.82211
HIST1H4D	-0.144217	6.95794	-2.02476	0.0512818	0.999382	-3.82232
L3MBTL	-0.120613	7.05353	-2.02432	0.0513296	0.999382	-3.82289
CLN3	-0.144241	8.51518	-2.02402	0.0513614	0.999382	-3.82327
LOC100134370	-0.125518	6.93378	-2.0238	0.0513853	0.999382	-3.82356
OR52B4	-0.16646	6.80955	-2.02371	0.0513958	0.999382	-3.82369
LOC650433	-0.12844	7.03987	-2.022	0.0515818	0.999382	-3.82591
MOCS3	-0.130772	6.97991	-2.02175	0.0516085	0.999382	-3.82623
LOC645015	0.156294	7.62077	2.02138	0.0516489	0.999382	-3.82671
PGBD5	-0.189913	6.8259	-2.02135	0.0516526	0.999382	-3.82675
SNORD107	-0.157089	6.92888	-2.02106	0.051684	0.999382	-3.82713
BAGE3	0.139136	6.74869	2.02051	0.051744	0.999382	-3.82784
NSUN2	0.139544	11.0393	2.02018	0.0517794	0.999382	-3.82826
LOC647031	0.117641	6.94569	2.01899	0.0519096	0.999382	-3.82981
PHF10	0.131743	9.69901	2.01889	0.0519213	0.999382	-3.82995
LOC389293	-0.232515	8.30528	-2.01879	0.0519319	0.999382	-3.83007
CNO	0.140105	9.57819	2.01847	0.0519666	0.999382	-3.83048
FAM22G	-0.123973	6.76919	-2.01813	0.0520044	0.999382	-3.83093
SCPEP1	-0.147789	10.4221	-2.01811	0.0520067	0.999382	-3.83096
SPANXF1	-0.124293	6.85573	-2.01807	0.0520109	0.999382	-3.83101
LOC652587	0.152894	6.87938	2.01779	0.0520411	0.999382	-3.83136
LOC643624	-0.124125	7.24461	-2.01775	0.0520461	0.999382	-3.83142
DPRXP4	0.143513	7.01384	2.01687	0.0521427	0.999382	-3.83256
OR11G2	-0.150812	6.96724	-2.01683	0.0521472	0.999382	-3.83262
UGT2B7	0.107683	7.03488	2.0162	0.0522161	0.999382	-3.83343
LOC649264	0.157728	6.93712	2.01526	0.0523192	0.999382	-3.83464
BDKRB1	-0.144295	6.83058	-2.01474	0.0523775	0.999382	-3.83533
H2BFM	0.13341	7.0797	2.01468	0.0523837	0.999382	-3.8354
LOC90342	0.164238	7.2044	2.01438	0.0524168	0.999382	-3.83579
RXRA	0.162012	9.98229	2.014	0.0524582	0.999382	-3.83628
LOC441709	-0.139098	6.93707	-2.01376	0.0524854	0.999382	-3.83659
SLC25A31	-0.134123	6.96194	-2.0132	0.0525476	0.999382	-3.83732
LOC643329	0.133335	6.93166	2.01309	0.0525594	0.999382	-3.83746
UTX	0.14754	7.68	2.01287	0.0525836	0.999382	-3.83774
LOC652813	-0.145758	6.92436	-2.01257	0.0526167	0.999382	-3.83813
CA10	-0.141229	6.94093	-2.01219	0.0526591	0.999382	-3.83863
LOC344165	0.137143	6.97659	2.01191	0.0526902	0.999382	-3.83899
FLJ90086	-0.158822	7.20941	-2.01129	0.0527587	0.999382	-3.83979
SEPT9	0.164411	11.6157	2.01086	0.0528064	0.999382	-3.84034
ZNF439	-0.127342	6.95002	-2.01085	0.0528075	0.999382	-3.84036
SNORA74A	-0.123569	6.92314	-2.01083	0.0528102	0.999382	-3.84039
LOC100132810	0.132976	7.00147	2.01045	0.0528527	0.999382	-3.84088
CARD18	-0.1334	6.77161	-2.00961	0.0529452	0.999382	-3.84196
IL31RA	-0.130976	6.90084	-2.00935	0.052975	0.999382	-3.8423
PPFIA4	-0.135538	6.97727	-2.00885	0.05303	0.999382	-3.84294
ZNF552	0.127697	7.08673	2.00835	0.0530862	0.999382	-3.84359
SLC25A43	-0.14622	9.11886	-2.00735	0.0531982	0.999382	-3.84489
FAM171A1	0.139091	7.1001	2.00703	0.0532343	0.999382	-3.84531
LOC647283	-0.137924	6.88546	-2.00701	0.0532356	0.999382	-3.84532
ASB8	0.140405	9.38995	2.00694	0.0532438	0.999382	-3.84542
DRGX	-0.143491	6.99887	-2.00683	0.0532563	0.999382	-3.84556
STK24	0.133323	11.2978	2.00668	0.0532735	0.999382	-3.84576
TCAM1	-0.13821	7.62276	-2.00631	0.0533148	0.999382	-3.84623
LOC647080	-0.137052	6.97897	-2.00594	0.0533555	0.999382	-3.8467
CYP1B1	0.224183	12.1906	2.00554	0.0534007	0.999382	-3.84722
LOC652553	-0.139726	6.88044	-2.00516	0.053443	0.999382	-3.84771
MUC16	0.122599	7.01332	2.00508	0.0534528	0.999382	-3.84782
LOC389963	0.152439	6.90132	2.00477	0.0534873	0.999382	-3.84822
LOC400456	-0.125087	7.04247	-2.00462	0.053504	0.999382	-3.84841
LOC342994	0.157978	7.00329	2.0044	0.0535287	0.999382	-3.84869
GFRA1	0.141612	7.04831	2.00428	0.0535424	0.999382	-3.84885
PDE4C	-0.285983	11.2722	-2.0042	0.0535507	0.999382	-3.84895
SNF8	0.197957	10.4701	2.00379	0.0535972	0.999382	-3.84948
TAS2R39	0.142803	7.15676	2.0031	0.0536746	0.999382	-3.85037
RUNDC3A	-0.130176	6.76715	-2.00089	0.0539249	0.999382	-3.85323
LOC100130221	0.134263	6.98811	2.00082	0.0539324	0.999382	-3.85331
LOC727967	0.145422	8.04541	2.00075	0.0539411	0.999382	-3.85341
EEF2	0.119069	13.9138	2.0005	0.053969	0.999382	-3.85373
LOC642141	-0.154385	6.95597	-2.00013	0.0540107	0.999382	-3.8542
LOC100132521	0.138722	6.9342	1.99945	0.0540882	0.999382	-3.85508
C1orf212	0.166292	8.07331	1.99928	0.0541072	0.999382	-3.8553
RIF1	0.156841	7.85513	1.99918	0.0541192	0.999382	-3.85544
UBQLNL	-0.128713	6.87774	-1.99858	0.0541866	0.999382	-3.8562
DEFA3	0.121764	6.75349	1.99841	0.0542064	0.999382	-3.85643
LOC100130344	0.128107	6.92597	1.99837	0.0542103	0.999382	-3.85647
ZBTB47	-0.148206	6.9192	-1.99808	0.0542434	0.999382	-3.85684
LOC100128332	-0.107737	6.92939	-1.99784	0.0542714	0.999382	-3.85716
NOLA1	0.175612	9.42597	1.99761	0.0542968	0.999382	-3.85745
FLJ46552	0.185877	7.7213	1.99757	0.0543013	0.999382	-3.8575
FAM20C	-0.151401	7.62961	-1.9974	0.0543215	0.999382	-3.85773
KIAA1571	0.186109	7.05568	1.99666	0.0544052	0.999382	-3.85867
DUSP19	-0.270449	9.48303	-1.99658	0.0544146	0.999382	-3.85878
LOC653362	0.135288	7.00791	1.99648	0.0544258	0.999382	-3.85891
RFTN1	0.118212	9.94726	1.99643	0.0544319	0.999382	-3.85897
SH2D3C	-0.139493	7.15545	-1.99618	0.0544606	0.999382	-3.8593
LOC642591	-0.119995	6.92579	-1.99579	0.0545051	0.999382	-3.8598
SCG5	-0.108247	6.94634	-1.99569	0.0545164	0.999382	-3.85993
LOC100133716	0.127177	6.92464	1.99549	0.0545386	0.999382	-3.86018
ZFP82	-0.14509	6.78231	-1.99547	0.0545413	0.999382	-3.86021
LOC652080	0.144267	6.89799	1.99421	0.0546855	0.999382	-3.86183
LOC100132947	0.133567	7.07597	1.99331	0.0547887	0.999382	-3.86299
MIR371	0.163799	7.01995	1.99315	0.0548073	0.999382	-3.86319
LOC149620	-0.150672	7.00789	-1.99303	0.0548208	0.999382	-3.86335
LOC100131930	-0.148188	7.19677	-1.99286	0.0548405	0.999382	-3.86357
LOC100129362	-0.26775	10.3432	-1.9926	0.0548706	0.999382	-3.8639
NCRNA00099	0.15912	6.95449	1.99217	0.0549194	0.999382	-3.86445
GALT	-0.181403	8.50707	-1.99207	0.0549312	0.999382	-3.86458
LOC730179	-0.137388	6.96496	-1.99151	0.0549955	0.999382	-3.8653
LOC729806	-0.172885	7.21118	-1.9914	0.0550083	0.999382	-3.86544
GPR116	0.124882	6.88394	1.99117	0.0550343	0.999382	-3.86573
LOC642666	-0.130285	6.94491	-1.99098	0.0550568	0.999382	-3.86598
CYB561	0.134599	7.52937	1.99096	0.055059	0.999382	-3.86601
LOC100129890	0.140064	8.05037	1.99016	0.055151	0.999382	-3.86703
RNPC2	-0.122029	7.01683	-1.98994	0.0551764	0.999382	-3.86731
LOC642351	-0.122693	6.93471	-1.98972	0.0552019	0.999382	-3.8676
TREML1	0.167152	7.04895	1.98935	0.0552448	0.999382	-3.86807
LOC643750	-0.129334	6.85772	-1.98925	0.055256	0.999382	-3.8682
C5orf43	-0.130515	7.02137	-1.98899	0.0552867	0.999382	-3.86854
LOC440992	-0.120647	6.86497	-1.9889	0.0552968	0.999382	-3.86865
RAB40A	-0.119503	6.90705	-1.98864	0.0553267	0.999382	-3.86898
FAM104A	0.125472	9.88376	1.98864	0.0553271	0.999382	-3.86899
LOC731282	0.141848	6.99372	1.98824	0.0553735	0.999382	-3.8695
LOC643376	-0.124978	7.05094	-1.98652	0.055573	0.999382	-3.87171
LOC651861	0.123356	7.04542	1.98635	0.0555927	0.999382	-3.87193
LOC100131738	-0.146087	6.88136	-1.98618	0.0556122	0.999382	-3.87214
RAB14	-0.139497	7.0042	-1.98611	0.0556203	0.999382	-3.87223
PIGX	-0.201578	7.58487	-1.98595	0.0556393	0.999382	-3.87244
GNB1	0.111015	12.1548	1.98563	0.0556757	0.999382	-3.87284
ACBD3	0.152525	9.44358	1.98526	0.0557195	0.999382	-3.87333
LOC648245	-0.113754	6.93542	-1.98496	0.0557537	0.999382	-3.8737
BRWD1	0.155715	8.4739	1.9847	0.0557851	0.999382	-3.87405
FSTL5	0.156319	6.77842	1.98406	0.0558592	0.999382	-3.87486
SULT1E1	-0.141873	6.9638	-1.98368	0.0559037	0.999382	-3.87535
OPTN	0.123595	7.16198	1.98356	0.0559179	0.999382	-3.8755
YIPF5	-0.171159	7.40297	-1.98345	0.0559306	0.999382	-3.87564
ZNF207	0.117314	11.916	1.9828	0.0560068	0.999382	-3.87648
FLJ40125	-0.143487	7.07077	-1.9824	0.056053	0.999382	-3.87699
GLCCI1	-0.121272	6.91543	-1.98236	0.0560576	0.999382	-3.87704
ZNF48	0.135194	7.09466	1.98215	0.0560821	0.999382	-3.8773
LRAP	-0.267143	10.6701	-1.98202	0.0560973	0.999382	-3.87747
GLIPR1L2	0.160136	6.9415	1.98201	0.0560993	0.999382	-3.87749
FLJ45256	0.121563	6.99132	1.98175	0.0561294	0.999382	-3.87782
FLJ33360	0.117066	6.79336	1.98156	0.0561512	0.999382	-3.87806
C19orf66	0.14544	7.07532	1.98133	0.0561791	0.999382	-3.87836
LOC442423	0.129749	6.88753	1.98098	0.0562196	0.999382	-3.8788
EPX	0.127538	6.90241	1.98069	0.0562542	0.999382	-3.87918
LOC100128406	-0.133084	6.92881	-1.98036	0.056293	0.999382	-3.87961
LOC441378	-0.139951	7.19567	-1.98004	0.0563307	0.999382	-3.88002
KLHL29	-0.163862	8.09715	-1.97999	0.0563364	0.999382	-3.88008
C11orf61	0.140534	7.2757	1.97988	0.0563486	0.999382	-3.88021
CLK1	-0.196896	9.03343	-1.97972	0.0563673	0.999382	-3.88041
PARP4	-0.18677	11.515	-1.97964	0.0563769	0.999382	-3.88052
LOC390933	0.119728	7.09721	1.97928	0.0564202	0.999382	-3.88099
ODF3L2	0.143023	6.78539	1.97923	0.0564255	0.999382	-3.88105
CST8	-0.131829	6.81595	-1.97913	0.0564374	0.999382	-3.88118
TMEM156	-0.140802	7.60771	-1.97897	0.0564561	0.999382	-3.88138
WWC1	0.137346	7.28007	1.9789	0.0564639	0.999382	-3.88146
BTBD6	-0.119405	9.50557	-1.97866	0.0564932	0.999382	-3.88178
NIPA2	0.138765	11.6376	1.97848	0.0565136	0.999382	-3.882
GPR62	0.138386	6.77101	1.97842	0.0565207	0.999382	-3.88208
LOC643161	-0.143811	6.86255	-1.97756	0.0566221	0.999382	-3.88318
LOC100130827	-0.13147	7.20162	-1.97729	0.0566542	0.999382	-3.88353
XRCC2	-0.198466	8.12498	-1.97707	0.0566807	0.999382	-3.88381
SMC4	0.139537	10.8574	1.97702	0.0566868	0.999382	-3.88388
LOC100134226	-0.143495	6.89125	-1.97595	0.0568126	0.999382	-3.88524
MGC70863	0.154939	7.3709	1.97591	0.0568181	0.999382	-3.8853
VSX2	0.124999	6.8521	1.97574	0.0568377	0.999382	-3.88551
LOC100129518	0.130871	6.99611	1.97536	0.0568825	0.999382	-3.88599
LOC126536	0.129467	6.72516	1.97534	0.0568854	0.999382	-3.88602
WWP2	0.129956	8.23411	1.97466	0.0569663	0.999382	-3.88689
SEC16B	-0.139058	6.89118	-1.97438	0.0569986	0.999382	-3.88724
MCL1	0.138015	9.28005	1.97391	0.0570547	0.999382	-3.88784
LOC651763	-0.156745	6.95452	-1.97383	0.0570643	0.999382	-3.88795
LOC441762	0.127001	6.89518	1.97377	0.057072	0.999382	-3.88803
OR4F5	-0.116961	6.92937	-1.97305	0.057157	0.999382	-3.88894
CCDC53	-0.161924	9.79447	-1.97288	0.0571779	0.999382	-3.88917
DCLK1	-0.139753	7.187	-1.9728	0.0571867	0.999382	-3.88926
FLJ42220	0.131605	6.95108	1.97199	0.0572834	0.999382	-3.8903
LOC650296	0.132027	7.00048	1.97195	0.0572884	0.999382	-3.89035
BIRC7	0.163643	7.00069	1.97184	0.0573021	0.999382	-3.89049
HEXIM2	-0.122049	7.2329	-1.97172	0.0573156	0.999382	-3.89064
MYLK4	0.121768	6.89788	1.97131	0.0573645	0.999382	-3.89116
LOC644338	-0.151163	7.04429	-1.97079	0.0574272	0.999382	-3.89183
CNGA4	-0.137742	7.01924	-1.96969	0.0575586	0.999382	-3.89323
SLED1	-0.125166	7.0701	-1.96945	0.0575874	0.999382	-3.89354
LOC653563	0.131763	7.02631	1.96925	0.0576114	0.999382	-3.89379
LOC650708	0.113366	7.05727	1.96893	0.0576492	0.999382	-3.8942
LOC100128781	0.13	7.31316	1.9686	0.0576894	0.999382	-3.89462
HEATR6	0.14567	7.90261	1.96852	0.0576984	0.999382	-3.89472
ZNF366	0.142781	7.01161	1.96844	0.0577081	0.999382	-3.89482
A4GALT	0.121213	6.79854	1.96822	0.0577353	0.999382	-3.89511
LOC100130262	-0.127443	7.05206	-1.96815	0.0577439	0.999382	-3.8952
LOC650159	-0.148991	7.08643	-1.9677	0.0577978	0.999382	-3.89577
SNX21	0.120514	6.9922	1.96707	0.0578735	0.999382	-3.89657
SAMD3	0.110025	6.99386	1.96694	0.0578895	0.999382	-3.89674
SKI	0.148194	7.4075	1.96691	0.0578919	0.999382	-3.89677
CACNA1B	0.143686	6.96474	1.96672	0.0579149	0.999382	-3.89701
SNHG5	-0.160376	12.993	-1.96622	0.057976	0.999382	-3.89766
TBC1D26	0.150465	6.9012	1.96582	0.0580244	0.999382	-3.89817
LOC728369	0.127352	6.96638	1.96578	0.0580286	0.999382	-3.89821
ANKRD43	0.142902	6.96217	1.96499	0.0581243	0.999382	-3.89922
PPBPL2	-0.141332	6.98294	-1.96442	0.0581925	0.999382	-3.89994
GEMIN8	-0.135442	7.56977	-1.96442	0.0581931	0.999382	-3.89994
DDX49	-0.181572	8.65819	-1.96432	0.058205	0.999382	-3.90007
CRY1	0.156337	8.05311	1.96425	0.0582131	0.999382	-3.90016
GDAP1	0.11905	7.39787	1.96388	0.0582578	0.999382	-3.90063
LOC100133503	-0.142633	7.08635	-1.96353	0.058301	0.999382	-3.90108
MIR520H	-0.132024	6.78927	-1.96334	0.0583236	0.999382	-3.90132
LOC729090	-0.361301	11.4071	-1.96246	0.0584304	0.999382	-3.90244
LOC646494	0.165135	7.12215	1.96219	0.0584637	0.999382	-3.90279
C10orf30	-0.169325	6.9643	-1.96192	0.0584963	0.999382	-3.90313
NCRNA00167	0.126824	6.9037	1.96162	0.0585321	0.999382	-3.9035
RSRC2	0.204966	10.4172	1.96157	0.0585386	0.999382	-3.90357
LOC644829	0.119245	6.99222	1.96153	0.058544	0.999382	-3.90363
MAPK13	0.1301	7.19171	1.96024	0.0586999	0.999382	-3.90525
LOC646373	0.134056	6.88036	1.95989	0.0587435	0.999382	-3.90571
FAM9B	-0.129945	6.9225	-1.95914	0.0588352	0.999382	-3.90666
LOC100131871	-0.143442	7.04485	-1.95908	0.0588415	0.999382	-3.90673
LOC728933	0.14447	6.78615	1.95903	0.0588476	0.999382	-3.90679
ATP1B1	0.174877	7.82751	1.95885	0.0588702	0.999382	-3.90703
RAB25	0.128889	6.87951	1.95838	0.0589281	0.999382	-3.90763
SAC	-0.16982	7.14481	-1.95773	0.0590073	0.999382	-3.90845
ERCC-00134	-0.127179	6.81677	-1.95741	0.0590458	0.999382	-3.90885
LOC728253	-0.284642	7.18105	-1.9574	0.0590481	0.999382	-3.90887
PTPRCAP	-0.115043	6.79759	-1.95739	0.0590488	0.999382	-3.90888
GPR153	0.115371	7.13185	1.95734	0.0590546	0.999382	-3.90894
LOC729433	0.156837	7.09783	1.95707	0.0590879	0.999382	-3.90928
FLJ45121	0.137919	6.73705	1.95689	0.0591097	0.999382	-3.90951
BAPX1	-0.127469	6.91554	-1.95682	0.059119	0.999382	-3.90961
QTRTD1	0.121218	9.11204	1.95681	0.05912	0.999382	-3.90962
OR1K1	0.123772	6.93751	1.95679	0.0591222	0.999382	-3.90964
LZTS2	-0.107438	7.15606	-1.95662	0.0591428	0.999382	-3.90985
LOC100132426	0.13355	6.83428	1.95643	0.0591661	0.999382	-3.91009
LOC643647	0.133549	6.98907	1.95584	0.0592383	0.999382	-3.91084
LOC643262	-0.111109	6.91929	-1.95581	0.059243	0.999382	-3.91089
SELI	-0.12922	7.83947	-1.95555	0.0592742	0.999382	-3.91121
LOC646914	-0.112471	6.92851	-1.95524	0.0593129	0.999382	-3.91161
AIM2	-0.142004	7.36951	-1.95511	0.0593282	0.999382	-3.91177
C7orf26	0.161424	9.30055	1.95509	0.0593309	0.999382	-3.91179
TP53TG3	-0.127851	6.98257	-1.95503	0.0593386	0.999382	-3.91187
RGS7BP	-0.136475	6.82351	-1.95467	0.0593831	0.999382	-3.91233
ZBTB5	0.133672	7.76623	1.95461	0.0593901	0.999382	-3.91241
LOC643662	0.129153	6.92092	1.95429	0.0594293	0.999382	-3.91281
NEDD1	0.153947	7.5289	1.95383	0.0594863	0.999382	-3.9134
MIR1978	-0.146547	12.4985	-1.95382	0.0594873	0.999382	-3.91341
C2orf39	-0.118067	6.72739	-1.95357	0.0595185	0.999382	-3.91373
LOC504188	0.140395	6.88644	1.95356	0.0595201	0.999382	-3.91374
LOC100131392	0.131676	6.85664	1.9528	0.0596129	0.999382	-3.9147
PHF12	0.125888	7.3554	1.95241	0.059662	0.999382	-3.9152
YES1	-0.163217	8.00138	-1.95209	0.0597017	0.999382	-3.91561
OCLM	0.138933	6.90252	1.95169	0.05975	0.999382	-3.9161
LOC649184	-0.154761	6.92851	-1.95169	0.0597502	0.999382	-3.9161
LOC650155	0.127474	7.08649	1.95151	0.0597729	0.999382	-3.91633
NAT9	0.114886	8.86307	1.95092	0.0598464	0.999382	-3.91709
LOC643089	-0.14973	7.00546	-1.95085	0.0598552	0.999382	-3.91718
LOC255411	-0.153859	6.99454	-1.94969	0.0599989	0.999382	-3.91864
LOC100132831	0.153611	6.8853	1.94887	0.0601004	0.999382	-3.91968
LOC646119	-0.13622	6.86093	-1.94873	0.0601174	0.999382	-3.91985
TLR1	-0.138188	6.90073	-1.94813	0.0601931	0.999382	-3.92062
SPATA9	-0.153611	7.05644	-1.94715	0.0603149	0.999382	-3.92185
LOC644094	0.136527	6.97025	1.94698	0.0603354	0.999382	-3.92206
ARHGEF5	0.141569	6.77695	1.94662	0.0603811	0.999382	-3.92252
LOC100134816	-0.175685	7.31913	-1.94646	0.0604004	0.999382	-3.92272
CLCN1	0.137457	6.98004	1.94645	0.0604017	0.999382	-3.92273
POU5F2	0.099162	6.77281	1.94528	0.0605488	0.999382	-3.92422
IVL	-0.146267	6.9621	-1.94528	0.0605491	0.999382	-3.92422
LOC100134053	-0.124205	7.25154	-1.94495	0.0605903	0.999382	-3.92464
RAB6C	0.161316	6.86982	1.94448	0.0606488	0.999382	-3.92523
UBE2MP1	-0.179434	7.20807	-1.94418	0.0606869	0.999382	-3.92561
LOC644477	-0.127451	6.95083	-1.94415	0.06069	0.999382	-3.92564
MBD4	-0.138287	8.81302	-1.94354	0.0607667	0.999382	-3.92641
RNF26	-0.117114	8.29017	-1.94333	0.0607935	0.999382	-3.92668
LOC651721	0.113781	6.87488	1.94329	0.0607981	0.999382	-3.92673
PPP1R15A	0.159341	9.96906	1.94296	0.060839	0.999382	-3.92714
PI16	0.13927	7.01109	1.94289	0.0608488	0.999382	-3.92724
GOLGA2LY1	-0.12968	6.84288	-1.94284	0.0608547	0.999382	-3.9273
LOC730919	0.124436	6.9668	1.94237	0.0609144	0.999382	-3.9279
LOC653817	-0.137385	6.91704	-1.94232	0.0609203	0.999382	-3.92796
LOC642855	0.142014	7.06156	1.94186	0.060978	0.999382	-3.92853
SLC35E1	-0.154126	9.15643	-1.94178	0.0609885	0.999382	-3.92864
LOC652427	0.137378	7.00783	1.94119	0.0610621	0.999382	-3.92938
PRSS36	-0.129343	6.96441	-1.941	0.0610865	0.999382	-3.92962
LOC652742	-0.142394	6.95772	-1.94041	0.0611606	0.999382	-3.93036
CSRNP3	0.125738	6.92527	1.94037	0.0611664	0.999382	-3.93042
LOC652326	-0.140232	7.09886	-1.94036	0.0611672	0.999382	-3.93043
KIF5C	-0.120838	6.99214	-1.93933	0.0612973	0.999382	-3.93172
LOC339742	-0.111929	7.06153	-1.93829	0.0614288	0.999382	-3.93303
IDH3B	0.161097	11.7269	1.93823	0.0614372	0.999382	-3.93312
LOC648003	-0.117066	6.92168	-1.93801	0.0614652	0.999382	-3.93339
RABL3	0.170935	9.18392	1.93763	0.0615123	0.999382	-3.93386
WRB	-0.160766	9.35321	-1.9376	0.061517	0.999382	-3.93391
LOC647645	0.115631	6.93893	1.93711	0.0615787	0.999382	-3.93452
FAM188A	-0.109704	8.6691	-1.93704	0.0615878	0.999382	-3.93461
LRRC37A3	-0.141242	6.9501	-1.9368	0.0616182	0.999382	-3.93491
TCL1B	-0.154825	7.06463	-1.93594	0.0617282	0.999382	-3.936
ZDHHC15	-0.118444	6.7343	-1.93567	0.0617619	0.999382	-3.93633
ARID4B	0.244778	8.42379	1.93565	0.0617647	0.999382	-3.93636
C11orf59	-0.106698	11.3231	-1.93517	0.0618253	0.999382	-3.93696
LOC649864	-0.152926	7.21775	-1.93511	0.0618334	0.999382	-3.93704
FBXL11	0.159395	8.91162	1.93465	0.0618917	0.999382	-3.93762
PCLO	-0.10234	6.94615	-1.93426	0.0619416	0.999382	-3.93811
CSPG5	-0.12302	6.9801	-1.93373	0.0620101	0.999382	-3.93878
DEADC1	-0.125973	6.91168	-1.93356	0.0620312	0.999382	-3.93899
UNC5D	-0.137317	6.79901	-1.93348	0.0620412	0.999382	-3.93909
C3orf19	0.135894	8.91142	1.93316	0.0620828	0.999382	-3.9395
LOC100129665	0.126319	6.92251	1.93305	0.062096	0.999382	-3.93963
LOC644813	-0.132307	6.88368	-1.93295	0.0621095	0.999382	-3.93976
CRYZ	-0.146084	9.54751	-1.93282	0.0621253	0.999382	-3.93992
LOC644826	0.123896	6.95615	1.93272	0.0621391	0.999382	-3.94005
LOC100130557	-0.124604	7.05012	-1.93224	0.0622003	0.999382	-3.94065
HUNK	0.126851	6.9076	1.93215	0.0622118	0.999382	-3.94077
SPRYD4	0.164032	8.10873	1.93209	0.0622191	0.999382	-3.94084
C16orf62	0.123852	7.42559	1.93192	0.0622419	0.999382	-3.94106
RNGTT	-0.136543	10.5729	-1.93187	0.0622474	0.999382	-3.94111
CSNK1G1	0.153954	8.52263	1.93177	0.0622602	0.999382	-3.94124
LOC647521	-0.128861	7.03798	-1.93176	0.0622615	0.999382	-3.94125
AS3MT	0.123475	6.98367	1.93175	0.0622635	0.999382	-3.94127
KIAA1751	-0.272014	8.21846	-1.93172	0.0622666	0.999382	-3.9413
GRM3	0.131899	6.96439	1.93154	0.0622899	0.999382	-3.94153
LOC400708	-0.125362	7.01204	-1.93112	0.0623437	0.999382	-3.94206
LOC342293	0.118875	6.90282	1.93094	0.0623677	0.999382	-3.94229
MIR499	-0.124685	6.85726	-1.93067	0.062402	0.999382	-3.94263
ATAD1	0.133314	9.30809	1.93009	0.0624765	0.999382	-3.94336
AZI2	0.161244	8.3677	1.92992	0.0624979	0.999382	-3.94356
CRHR1	-0.147063	7.21349	-1.92974	0.0625208	0.999382	-3.94379
CARD17	-0.112979	7.00968	-1.92974	0.0625217	0.999382	-3.9438
SUV39H2	0.134859	7.25441	1.92958	0.0625422	0.999382	-3.944
LOC731823	0.113919	6.98889	1.92937	0.0625695	0.999382	-3.94426
ADCYAP1	0.138283	6.72308	1.92859	0.0626689	0.999382	-3.94523
LOC100129034	-0.137162	7.26556	-1.92828	0.0627092	0.999382	-3.94562
LOC440820	-0.124167	6.92936	-1.92828	0.06271	0.999382	-3.94563
LOC642505	0.154875	7.00597	1.92798	0.0627486	0.999382	-3.94601
LOC647213	-0.133689	6.93879	-1.92742	0.0628203	0.999382	-3.9467
ProSAPiP1	0.124345	6.98806	1.92739	0.0628241	0.999382	-3.94674
GIMAP2	-0.149154	7.33539	-1.92732	0.0628336	0.999382	-3.94683
SCARNA20	0.194891	7.01897	1.92711	0.0628607	0.999382	-3.9471
LOC100134050	-0.124162	6.91721	-1.92689	0.0628891	0.999382	-3.94737
PLEKHH1	-0.12159	6.86593	-1.9267	0.0629133	0.999382	-3.94761
TP53BP2	0.148856	9.07526	1.92628	0.0629682	0.999382	-3.94814
ATP6V0B	-0.105343	12.0361	-1.9262	0.062979	0.999382	-3.94824
KIF17	0.116913	6.75667	1.92618	0.0629813	0.999382	-3.94827
NKAPL	0.142257	6.98454	1.92548	0.0630716	0.999382	-3.94914
WBP4	-0.152374	9.38591	-1.92519	0.06311	0.999382	-3.94951
SCARNA22	0.143101	7.20369	1.9241	0.0632511	0.999382	-3.95087
PIAS1	0.148721	9.15294	1.92409	0.0632528	0.999382	-3.95089
CLINT1	0.128757	10.774	1.92389	0.0632788	0.999382	-3.95114
LOC650901	0.136054	6.94908	1.9238	0.0632902	0.999382	-3.95125
LOC649856	0.143295	7.53621	1.92373	0.0632987	0.999382	-3.95133
HIST1H2BJ	0.12291	7.31521	1.92343	0.0633383	0.999382	-3.95171
MIR608	-0.119473	6.85424	-1.92337	0.063346	0.999382	-3.95179
LOC731050	-0.130334	6.86697	-1.92261	0.0634452	0.999382	-3.95274
LOC644423	-0.110631	7.6802	-1.92251	0.0634576	0.999382	-3.95286
LOC644359	0.123165	6.89655	1.92193	0.0635336	0.999382	-3.95359
LOC644893	-0.116946	6.82436	-1.92189	0.0635395	0.999382	-3.95365
MIR651	0.12089	6.85018	1.92158	0.0635792	0.999382	-3.95403
MIR1256	0.13978	6.92769	1.92135	0.0636098	0.999382	-3.95432
LASS5	-0.156994	7.97158	-1.92101	0.0636543	0.999382	-3.95475
FLJ42289	-0.147569	7.1723	-1.92095	0.0636622	0.999382	-3.95482
TATDN3	-0.11741	8.92213	-1.92084	0.0636766	0.999382	-3.95496
LOC100129285	0.158109	6.93588	1.92077	0.0636858	0.999382	-3.95505
LOC100101115	-0.111388	6.87458	-1.92068	0.0636973	0.999382	-3.95516
TOP	-0.154256	7.21746	-1.92066	0.0636994	0.999382	-3.95518
INPP5D	0.11014	9.77403	1.91997	0.0637898	0.999382	-3.95604
SIKE	0.149776	7.2392	1.91978	0.0638149	0.999382	-3.95628
TRPC4	-0.156629	7.02951	-1.91936	0.0638695	0.999382	-3.9568
CNTNAP2	-0.12858	6.71713	-1.91912	0.0639012	0.999382	-3.95711
TMEM90A	0.157742	6.98717	1.91909	0.0639047	0.999382	-3.95714
MIR181A1	-0.131855	6.95738	-1.91894	0.063925	0.999382	-3.95733
LOC642006	-0.120233	6.92344	-1.91828	0.0640115	0.999382	-3.95816
PRKD1	0.115451	6.75386	1.91777	0.0640787	0.999382	-3.9588
LOC283152	-0.131202	6.91693	-1.91745	0.0641204	0.999382	-3.95919
LOC729856	-0.128926	6.8698	-1.91731	0.0641394	0.999382	-3.95937
LOC730058	-0.140172	7.12513	-1.91671	0.0642184	0.999382	-3.96012
LOC645094	-0.186009	8.01989	-1.9166	0.0642326	0.999382	-3.96026
APOBEC3F	-0.138666	7.48335	-1.91648	0.0642491	0.999382	-3.96041
KIAA1648	-0.138306	6.88761	-1.91605	0.0643048	0.999382	-3.96094
ZNF613	0.139952	8.01353	1.91588	0.0643278	0.999382	-3.96116
URB2	0.135464	8.90179	1.91545	0.0643841	0.999382	-3.96169
GPRIN3	0.127077	6.76772	1.91524	0.0644124	0.999382	-3.96196
RPS6KA5	-0.141727	7.97991	-1.91517	0.0644217	0.999382	-3.96205
TIGD5	0.152671	10.1978	1.91473	0.0644798	0.999382	-3.9626
SLC3A2	0.18353	9.50015	1.91403	0.0645721	0.999382	-3.96347
CTAGE4	-0.101834	6.83713	-1.91358	0.0646315	0.999382	-3.96403
DMD	0.13114	7.18122	1.91337	0.06466	0.999382	-3.9643
LOC554206	0.139619	7.25433	1.91327	0.0646734	0.999382	-3.96442
ATP13A3	-0.141989	7.33721	-1.91316	0.0646875	0.999382	-3.96456
UFSP2	-0.121211	9.10922	-1.9131	0.0646949	0.999382	-3.96463
LOC100131223	0.121554	7.08503	1.91289	0.0647233	0.999382	-3.96489
LOC100129269	-0.136161	7.75618	-1.91259	0.0647629	0.999382	-3.96527
LOC388925	-0.138863	7.06317	-1.91234	0.0647962	0.999382	-3.96558
ASB7	0.121768	7.44959	1.91221	0.0648135	0.999382	-3.96574
LOC100128361	0.119309	7.0443	1.91203	0.0648373	0.999382	-3.96597
PRINS	0.163365	6.96961	1.91192	0.0648518	0.999382	-3.9661
LOC643847	0.133289	6.98597	1.91022	0.0650786	0.999382	-3.96823
MIR24-2	0.119978	6.87783	1.90984	0.0651294	0.999382	-3.9687
LOC727737	0.123971	7.02863	1.90882	0.0652644	0.999382	-3.96996
LOC642521	-0.120851	6.93889	-1.90874	0.0652751	0.999382	-3.97006
LINS1	-0.120658	8.00309	-1.90863	0.0652907	0.999382	-3.97021
LOC400965	0.1368	6.98999	1.90807	0.0653658	0.999382	-3.97091
P2RY13	-0.112807	7.0707	-1.90788	0.0653908	0.999382	-3.97114
TPSG1	-0.121668	6.84759	-1.90782	0.065399	0.999382	-3.97122
LOC644496	-0.11707	6.97145	-1.90704	0.065503	0.999382	-3.97219
EGR2	0.134483	7.05061	1.906	0.065642	0.999382	-3.97348
SNORA50	-0.123886	6.9236	-1.90573	0.0656783	0.999382	-3.97381
OR8G1	-0.151594	6.92931	-1.90531	0.0657353	0.999382	-3.97434
LOC647582	-0.137846	6.88531	-1.90525	0.0657429	0.999382	-3.97441
AKAP9	0.116757	6.98017	1.9047	0.0658177	0.999382	-3.9751
BPY2	-0.147028	7.01439	-1.90463	0.0658266	0.999382	-3.97518
MS4A5	-0.121957	6.77564	-1.90346	0.065984	0.999382	-3.97664
ANKRA2	-0.189449	8.17787	-1.90307	0.0660367	0.999382	-3.97712
HMGN3	-0.175635	7.41026	-1.90305	0.0660403	0.999382	-3.97716
LOC442028	-0.137259	6.87822	-1.90301	0.0660449	0.999382	-3.9772
SPARCL1	0.114028	6.99914	1.90301	0.0660454	0.999382	-3.9772
CYP46A1	-0.133056	6.88896	-1.90283	0.0660699	0.999382	-3.97743
CSF2	-0.123084	6.92191	-1.90267	0.0660908	0.999382	-3.97762
LOC652735	0.127454	6.94631	1.90263	0.0660963	0.999382	-3.97767
ECHS1	-0.104279	11.3833	-1.9026	0.0661011	0.999382	-3.97772
LOC100132469	0.101303	6.951	1.90204	0.0661765	0.999382	-3.97841
OR6C74	0.119661	6.90662	1.90198	0.0661845	0.999382	-3.97848
CAPN11	0.109381	6.96776	1.90172	0.0662189	0.999382	-3.9788
PAK7	-0.109813	6.99877	-1.90165	0.0662286	0.999382	-3.97889
LAX1	-0.148027	6.99073	-1.90151	0.0662486	0.999382	-3.97907
ZNF263	0.120649	9.40864	1.90132	0.0662739	0.999382	-3.9793
ZFR	-0.118597	12.1958	-1.90094	0.0663252	0.999382	-3.97978
PRAMEF9	-0.128708	6.99244	-1.90082	0.0663419	0.999382	-3.97993
LOC643857	0.127779	6.87307	1.90037	0.0664018	0.999382	-3.98048
LOC440871	0.147686	6.86281	1.90012	0.066436	0.999382	-3.98079
LOC642693	0.128733	6.8196	1.8998	0.066479	0.999382	-3.98118
NTNG1	0.110389	6.90538	1.89972	0.0664904	0.999382	-3.98129
BAG5	0.11145	9.77554	1.89968	0.0664965	0.999382	-3.98134
LOC645609	-0.1357	8.14358	-1.89897	0.0665927	0.999382	-3.98222
LOC100128881	0.123159	7.22923	1.89887	0.0666063	0.999382	-3.98235
MIR2116	-0.157609	6.92531	-1.89882	0.0666133	0.999382	-3.98241
LOC644342	0.125944	6.8859	1.89863	0.066638	0.999382	-3.98264
PPP3CA	0.155318	7.92639	1.89847	0.066661	0.999382	-3.98285
UBXN4	-0.102925	10.9094	-1.89804	0.0667188	0.999382	-3.98337
FAM40B	-0.158487	7.38148	-1.89793	0.0667342	0.999382	-3.98351
ADIG	0.127558	6.78147	1.89755	0.0667862	0.999382	-3.98399
LOC644613	-0.140529	6.82316	-1.89753	0.0667883	0.999382	-3.98401
LOC132241	-0.133734	7.51365	-1.89739	0.0668069	0.999382	-3.98418
LOC100134199	-0.145744	7.13847	-1.89714	0.0668412	0.999382	-3.98449
PLA2G4B	-0.130344	7.60362	-1.89651	0.0669276	0.999382	-3.98527
C10orf68	0.119681	6.98394	1.89648	0.0669323	0.999382	-3.98532
PABPC1L	-0.109118	7.19317	-1.89647	0.0669329	0.999382	-3.98532
OGDHL	0.132226	6.94243	1.89646	0.0669341	0.999382	-3.98533
RXRG	-0.138601	7.05811	-1.89624	0.0669642	0.999382	-3.98561
RPL14L	-0.120189	13.9137	-1.89614	0.0669786	0.999382	-3.98574
OR4D10	-0.12246	7.06308	-1.89611	0.0669815	0.999382	-3.98576
OBFC2A	0.126199	9.00026	1.89536	0.0670847	0.999382	-3.9867
LOC100128554	0.117743	6.8794	1.89534	0.0670874	0.999382	-3.98672
RUNDC1	0.119484	8.72852	1.89517	0.0671113	0.999382	-3.98694
C3orf52	-0.13437	6.96562	-1.89491	0.0671466	0.999382	-3.98726
KIAA1826	0.122458	9.14149	1.89477	0.0671658	0.999382	-3.98743
LOC652563	-0.126112	7.27904	-1.8944	0.0672165	0.999382	-3.98789
LOC645181	0.113961	7.01985	1.89417	0.0672474	0.999382	-3.98817
MIR302C	0.165603	7.4102	1.89416	0.0672496	0.999382	-3.98819
LOC643582	0.138526	6.87622	1.89374	0.0673064	0.999382	-3.98871
AGPAT2	0.109069	9.07154	1.89371	0.0673104	0.999382	-3.98874
C1orf150	0.140863	6.85907	1.89371	0.0673107	0.999382	-3.98874
PTPN14	0.143265	6.83092	1.89311	0.0673935	0.999382	-3.98949
LOC100133840	-0.125658	7.23311	-1.89266	0.0674552	0.999382	-3.99005
ACSM5	0.12757	7.02858	1.89258	0.0674661	0.999382	-3.99014
DLAT	0.141081	9.6798	1.89255	0.0674697	0.999382	-3.99018
AZGP1	-0.13219	6.82343	-1.89215	0.0675246	0.999382	-3.99067
LOC647696	0.119918	6.9219	1.89198	0.0675482	0.999382	-3.99088
LOC646604	-0.139737	7.07894	-1.89182	0.0675705	0.999382	-3.99108
SNORD4A	-0.138377	7.4544	-1.89176	0.067579	0.999382	-3.99116
BAIAP3	-0.124598	6.96291	-1.89095	0.0676901	0.999382	-3.99216
LOC100134160	0.116062	6.99091	1.89091	0.0676956	0.999382	-3.99221
CSPP1	0.153955	9.28848	1.89072	0.0677215	0.999382	-3.99244
COPB2	0.106661	10.1815	1.89036	0.0677713	0.999382	-3.99289
PRPH2	-0.118324	7.01377	-1.89015	0.0678001	0.999382	-3.99315
LOC729862	0.139702	7.10783	1.88967	0.0678667	0.999382	-3.99374
AGBL4	0.10612	6.77108	1.88967	0.0678671	0.999382	-3.99375
BMS1P5	-0.263894	9.48221	-1.88884	0.0679817	0.999382	-3.99477
LOC340970	-0.135906	6.83861	-1.88857	0.0680186	0.999382	-3.9951
ABCC5	-0.154056	7.80032	-1.88853	0.0680243	0.999382	-3.99515
PCDHB6	0.127687	6.99345	1.88833	0.0680518	0.999382	-3.9954
ORC1L	0.160869	8.34292	1.88768	0.0681421	0.999382	-3.9962
LOC196120	-0.11476	6.94908	-1.88734	0.0681895	0.999382	-3.99662
PSMA8	0.110441	6.71673	1.8866	0.068293	0.999382	-3.99755
LOC647783	0.139967	6.98021	1.88542	0.0684558	0.999382	-3.99899
LOC647156	0.111905	6.98435	1.88525	0.0684798	0.999382	-3.99921
LOC100132352	-0.149111	7.90192	-1.88495	0.0685215	0.999382	-3.99957
EMR3	-0.115402	6.87769	-1.8849	0.0685286	0.999382	-3.99964
LRRFIP1	-0.221051	8.89087	-1.88489	0.0685301	0.999382	-3.99965
LOC644234	-0.114559	7.05148	-1.88479	0.0685448	0.999382	-3.99978
LOC650429	-0.123112	6.89456	-1.88465	0.0685633	0.999382	-3.99995
CACNA2D3	-0.150235	8.08321	-1.88436	0.0686046	0.999382	-4.00031
DNAH5	-0.127268	6.8553	-1.88372	0.0686928	0.999382	-4.00109
SEC11C	-0.148369	11.6675	-1.8833	0.0687515	0.999382	-4.00161
LOC643824	0.15117	7.02517	1.88324	0.0687601	0.999382	-4.00169
LOC387885	-0.124357	7.00681	-1.88299	0.0687948	0.999382	-4.00199
ACTN4	0.208336	9.30627	1.88273	0.0688314	0.999382	-4.00231
GALNTL4	0.109036	6.81221	1.88234	0.0688858	0.999382	-4.00279
PIAS2	0.138905	8.6409	1.88214	0.0689148	0.999382	-4.00305
ADAMTS7	-0.103863	7.00472	-1.88106	0.0690654	0.999382	-4.00438
LOC645476	-0.139671	7.00307	-1.881	0.0690745	0.999382	-4.00445
LOC652614	-0.139401	7.05059	-1.88046	0.0691497	0.999382	-4.00511
OGN	0.15171	7.01117	1.8804	0.0691589	0.999382	-4.0052
LOC646992	0.12144	6.91241	1.88038	0.069161	0.999382	-4.00521
SGIP1	-0.11217	7.0855	-1.88037	0.0691632	0.999382	-4.00523
LOC100132247	-0.167452	8.10124	-1.88001	0.0692136	0.999382	-4.00568
LOC442211	-0.110585	6.99258	-1.87915	0.0693342	0.999382	-4.00673
GFRAL	0.119676	6.95194	1.87902	0.0693523	0.999382	-4.00689
F10	0.14048	6.84833	1.87893	0.0693656	0.999382	-4.00701
COBL	0.121545	7.00001	1.87755	0.0695601	0.999382	-4.00871
LOC728648	0.126702	6.88805	1.8775	0.0695669	0.999382	-4.00877
LOC100133421	0.148573	7.05767	1.87722	0.0696062	0.999382	-4.00911
FLJ30058	-0.11372	6.87456	-1.87632	0.0697338	0.999382	-4.01022
TNRC9	-0.122312	6.85882	-1.87631	0.0697344	0.999382	-4.01022
LOC728934	-0.125612	7.19274	-1.87625	0.0697429	0.999382	-4.0103
LOC654191	-0.135163	7.42786	-1.87604	0.0697727	0.999382	-4.01056
FIG4	-0.144096	8.75164	-1.87604	0.0697735	0.999382	-4.01056
C7orf33	0.132016	6.79366	1.87564	0.0698292	0.999382	-4.01105
MYL4	0.125359	6.98022	1.87521	0.06989	0.999382	-4.01158
GEN1	0.116247	7.3566	1.8751	0.0699063	0.999382	-4.01172
LOC100131778	0.142009	6.87146	1.87491	0.069933	0.999382	-4.01195
GDF15	-0.113389	6.8795	-1.8747	0.0699626	0.999382	-4.01221
TLR2	0.124425	6.91102	1.87436	0.0700113	0.999382	-4.01263
CCS	0.118441	7.80615	1.87416	0.0700401	0.999382	-4.01288
ZNF766	0.128938	8.17752	1.87379	0.0700927	0.999382	-4.01333
XIRP2	-0.117204	6.80195	-1.8734	0.0701481	0.999382	-4.01381
SHISA2	-0.190244	10.419	-1.87333	0.070157	0.999382	-4.01389
SYPL2	0.154601	6.85255	1.87332	0.0701586	0.999382	-4.0139
KIAA0586	0.133275	8.38217	1.87315	0.0701832	0.999382	-4.01412
DNAJC2	0.157413	7.15248	1.8729	0.070218	0.999382	-4.01442
PIAS3	0.154961	7.08472	1.87268	0.0702503	0.999382	-4.0147
SLC2A11	-0.108119	7.08856	-1.8725	0.0702752	0.999382	-4.01491
PCSK5	0.147389	7.10171	1.87238	0.0702926	0.999382	-4.01506
KCNQ1OT1	-0.136693	7.33192	-1.87231	0.0703027	0.999382	-4.01515
LGALS7B	-0.120698	6.84654	-1.872	0.0703472	0.999382	-4.01553
CCRN4L	0.128646	9.28958	1.87155	0.0704113	0.999382	-4.01608
F12	-0.121182	7.55442	-1.87124	0.070455	0.999382	-4.01646
OR8U8	0.10705	6.73385	1.87122	0.0704576	0.999382	-4.01648
AFARP1	-0.146712	7.06423	-1.87115	0.0704673	0.999382	-4.01656
CPNE8	-0.17787	9.32364	-1.8708	0.0705182	0.999382	-4.017
SGSM1	0.12718	6.99466	1.87076	0.0705233	0.999382	-4.01705
ABTB2	0.150425	7.22062	1.87061	0.0705457	0.999382	-4.01724
OTUB1	0.109714	7.77131	1.87042	0.0705723	0.999382	-4.01747
TBPL2	0.13994	6.79937	1.87022	0.0706007	0.999382	-4.01771
C1orf69	0.133343	7.45132	1.86977	0.0706647	0.999382	-4.01826
LOC649812	0.145908	6.90226	1.86953	0.0706997	0.999382	-4.01856
LOC648548	0.140029	7.00422	1.86916	0.0707521	0.999382	-4.01901
LOC729608	0.135191	11.9291	1.86884	0.0707989	0.999382	-4.01941
PLIN2	0.150098	9.66489	1.86863	0.0708288	0.999382	-4.01967
LOC100133272	0.139177	6.79165	1.86855	0.07084	0.999382	-4.01976
LOC644196	0.107758	6.97034	1.8684	0.0708617	0.999382	-4.01995
LOC100130356	0.115573	6.89825	1.86812	0.0709019	0.999382	-4.02029
CRKL	0.13175	10.69	1.86742	0.0710024	0.999382	-4.02115
ZNF606	0.105602	6.83545	1.86712	0.0710446	0.999382	-4.02151
LOC643274	-0.134507	6.95074	-1.86659	0.0711216	0.999382	-4.02217
LOC644736	-0.131794	6.88807	-1.86657	0.071124	0.999382	-4.02219
LOC649937	-0.134402	6.81312	-1.86648	0.0711377	0.999382	-4.0223
DSCR4	-0.147238	7.06359	-1.86644	0.0711422	0.999382	-4.02234
PLEKHH2	0.117194	6.81876	1.86592	0.0712181	0.999382	-4.02299
REL	0.113771	7.08253	1.86543	0.0712881	0.999382	-4.02358
LOC100133982	-0.110081	7.00711	-1.86524	0.0713162	0.999382	-4.02382
SLMO1	0.140846	7.96621	1.86498	0.0713532	0.999382	-4.02414
TULP2	-0.122951	6.73438	-1.86462	0.0714049	0.999382	-4.02458
LOC647269	0.140347	6.97408	1.86423	0.0714618	0.999382	-4.02506
IGFL4	0.142512	6.93923	1.86415	0.0714734	0.999382	-4.02516
LOC729912	-0.140211	7.07298	-1.86411	0.0714796	0.999382	-4.02521
IL9	0.114746	7.03428	1.8639	0.0715094	0.999382	-4.02546
LOC731444	-0.145148	6.97806	-1.86377	0.0715273	0.999382	-4.02561
FLJ46230	0.129595	6.93438	1.86308	0.0716281	0.999382	-4.02647
SCARNA2	0.135404	6.92848	1.86266	0.0716882	0.999382	-4.02697
TMEM65	-0.122366	7.04059	-1.86226	0.0717471	0.999382	-4.02747
LOC100134812	0.112244	6.92306	1.86115	0.0719079	0.999382	-4.02883
FILIP1L	0.15942	7.40841	1.86097	0.0719339	0.999382	-4.02905
LOC392506	-0.106468	7.04466	-1.86093	0.0719402	0.999382	-4.0291
CLSPN	0.129396	7.02161	1.86048	0.0720053	0.999382	-4.02965
LOC644474	-0.124772	6.97696	-1.86046	0.0720075	0.999382	-4.02967
SLC38A11	0.143602	7.06794	1.86024	0.0720402	0.999382	-4.02994
LOC402112	-0.18425	12.8506	-1.86012	0.0720574	0.999382	-4.03009
TRIM39	0.190883	7.9505	1.85962	0.0721304	0.999382	-4.0307
C12orf72	0.132564	6.82751	1.85944	0.0721565	0.999382	-4.03092
C14orf184	0.144572	6.91531	1.85899	0.0722218	0.999382	-4.03147
C1orf68	-0.110014	6.88399	-1.85892	0.0722315	0.999382	-4.03155
KIAA1618	0.108826	7.02174	1.85879	0.0722503	0.999382	-4.0317
CCBP2	0.123723	6.9257	1.85867	0.0722679	0.999382	-4.03185
LOC100133224	-0.130707	7.64006	-1.85849	0.0722946	0.999382	-4.03208
CEACAM6	0.129593	6.90821	1.85785	0.0723882	0.999382	-4.03286
LOC400721	-0.223782	12.1543	-1.85683	0.0725372	0.999382	-4.0341
SLIC1	0.115872	6.97089	1.85658	0.0725734	0.999382	-4.03441
RECQL5	0.129952	7.10093	1.85622	0.0726263	0.999382	-4.03485
PPP4R1	0.134047	8.9524	1.85559	0.0727183	0.999382	-4.03561
LOC728411	0.129987	6.96487	1.8552	0.0727758	0.999382	-4.03609
AJAP1	0.133408	7.17189	1.85502	0.0728024	0.999382	-4.03631
FRMPD2L2	-0.114142	6.96272	-1.85431	0.0729066	0.999382	-4.03718
LOC100133993	0.117228	6.90594	1.85422	0.0729208	0.999382	-4.0373
LOC100129982	-0.181774	8.03821	-1.85411	0.0729361	0.999382	-4.03742
LOC645307	0.113959	7.00184	1.85375	0.0729886	0.999382	-4.03786
RAB19	0.117086	6.84203	1.85366	0.073003	0.999382	-4.03798
LOC100131017	-0.130888	7.54116	-1.85358	0.0730137	0.999382	-4.03807
SERTAD3	0.125844	8.7223	1.85353	0.0730211	0.999382	-4.03813
YARS	0.16087	11.5422	1.85322	0.0730672	0.999382	-4.03851
LIME1	-0.156161	7.68406	-1.85289	0.0731163	0.999382	-4.03892
CYP8B1	0.109018	6.83038	1.85279	0.0731302	0.999382	-4.03903
LOC390231	0.138457	6.94706	1.85249	0.073174	0.999382	-4.03939
FAM184B	-0.127409	6.92355	-1.85232	0.0731997	0.999382	-4.03961
KCNA6	-0.113259	6.96108	-1.85232	0.0732002	0.999382	-4.03961
SCARNA15	-0.147146	6.94516	-1.85218	0.0732204	0.999382	-4.03978
LOC648447	0.112949	6.84663	1.85216	0.0732233	0.999382	-4.0398
CST5	-0.113074	6.91299	-1.85184	0.0732699	0.999382	-4.04019
SMCHD1	0.144913	7.29786	1.85161	0.0733042	0.999382	-4.04047
HCFC2	0.154413	7.48874	1.8516	0.0733065	0.999382	-4.04049
IL10RA	-0.153095	7.16195	-1.85143	0.0733306	0.999382	-4.04069
LOC390507	-0.152756	6.94027	-1.85125	0.0733577	0.999382	-4.04091
LOC643406	-0.131491	6.91693	-1.85088	0.0734124	0.999382	-4.04136
SCARNA13	-0.135933	7.66455	-1.85065	0.0734456	0.999382	-4.04163
NEURL	0.109439	6.82511	1.85032	0.0734952	0.999382	-4.04204
C19orf75	0.115272	6.8415	1.85027	0.073503	0.999382	-4.04211
C2orf28	-0.112021	11.8557	-1.84958	0.073605	0.999382	-4.04295
CCT2	0.168787	12.5751	1.84957	0.0736063	0.999382	-4.04296
TXNIP	0.259516	10.9764	1.8493	0.0736464	0.999382	-4.04329
ZNF85	0.113969	6.76276	1.8491	0.0736751	0.999382	-4.04352
FLJ35379	-0.104039	6.90385	-1.84893	0.073701	0.999382	-4.04373
LOC100133928	-0.116871	6.90473	-1.84886	0.0737109	0.999382	-4.04381
JUND	0.117422	12.815	1.84879	0.0737216	0.999382	-4.0439
NOXA1	-0.1158	6.99198	-1.84865	0.0737427	0.999382	-4.04408
LOC730313	-0.305187	9.99707	-1.84858	0.0737528	0.999382	-4.04416
PSMD12	-0.248509	12.2445	-1.8484	0.0737803	0.999382	-4.04438
LOC729025	0.127346	6.92898	1.84825	0.0738017	0.999382	-4.04456
MAP1LC3B2	0.16129	6.94318	1.8479	0.0738539	0.999382	-4.04499
C21orf122	0.119484	7.2128	1.84771	0.0738824	0.999382	-4.04522
ZNF295	0.131527	7.75585	1.8477	0.0738843	0.999382	-4.04524
C1orf81	0.15056	7.04953	1.84728	0.0739461	0.999382	-4.04574
LOC644525	0.119394	7.15779	1.84704	0.0739817	0.999382	-4.04603
ITGA2	0.130331	7.04429	1.84689	0.074004	0.999382	-4.04621
TLX3	-0.115314	6.89069	-1.84686	0.0740084	0.999382	-4.04625
UNC119	0.130473	8.46883	1.84662	0.0740443	0.999382	-4.04654
FAM27L	0.146538	7.08581	1.84651	0.0740615	0.999382	-4.04668
C1QTNF5	-0.119035	6.74407	-1.84619	0.0741078	0.999382	-4.04706
C19orf63	-0.118556	7.44535	-1.84585	0.0741593	0.999382	-4.04748
LOC644538	-0.138138	7.00007	-1.84543	0.0742217	0.999382	-4.04799
RPP38	0.147611	7.74991	1.84524	0.0742497	0.999382	-4.04822
C1orf144	-0.114652	9.94404	-1.84498	0.0742894	0.999382	-4.04854
C19orf20	0.134351	7.14779	1.84497	0.0742908	0.999382	-4.04855
OR4K2	0.121539	6.94812	1.84485	0.0743086	0.999382	-4.0487
PPAPDC1B	-0.164643	8.86842	-1.84464	0.0743402	0.999382	-4.04895
AK2P2	-0.146613	7.03263	-1.84456	0.0743512	0.999382	-4.04904
CASQ2	-0.130651	7.02229	-1.84395	0.0744428	0.999382	-4.04979
SLC7A8	-0.120557	7.15876	-1.84393	0.0744462	0.999382	-4.04982
ANKRD20A3	-0.133842	7.04101	-1.8434	0.0745251	0.999382	-4.05046
MIR340	0.128636	6.86457	1.84318	0.0745583	0.999382	-4.05073
LOC255167	-0.354793	8.76524	-1.84316	0.0745613	0.999382	-4.05075
HRK	0.162499	6.97213	1.8431	0.0745695	0.999382	-4.05082
LOC100129121	-0.148261	6.84959	-1.843	0.0745855	0.999382	-4.05095
SERINC2	-0.136437	7.46566	-1.84291	0.074599	0.999382	-4.05106
LOC643461	-0.113586	6.99407	-1.84289	0.0746022	0.999382	-4.05108
PDLIM5	0.115823	7.12256	1.84249	0.0746619	0.999382	-4.05157
LOC649821	-0.174179	13.259	-1.84164	0.0747886	0.999382	-4.05259
LRRC37B2	-0.232263	8.9788	-1.8416	0.0747944	0.999382	-4.05264
CACNA1D	-0.136433	7.0284	-1.84146	0.0748161	0.999382	-4.05281
PTTG1IP	0.124785	11.0276	1.84116	0.0748606	0.999382	-4.05317
LHX1	0.123195	6.88252	1.84095	0.074893	0.999382	-4.05343
LOC728290	-0.122353	6.86604	-1.8408	0.074916	0.999382	-4.05362
SPRR2F	0.136372	6.92921	1.84065	0.0749382	0.999382	-4.0538
RBM28	0.140773	8.83333	1.84061	0.0749441	0.999382	-4.05384
ERICH1	0.120116	10.2198	1.84019	0.075007	0.999382	-4.05435
PDZD3	-0.0967295	6.92817	-1.84009	0.0750226	0.999382	-4.05448
LOC121006	0.120181	6.98652	1.83997	0.0750399	0.999382	-4.05462
GYG2	0.125618	7.10948	1.83882	0.0752136	0.999382	-4.05601
LOC651091	-0.144639	6.88588	-1.83815	0.0753142	0.999382	-4.05682
HPGDS	-0.13935	6.92677	-1.83815	0.0753147	0.999382	-4.05682
CAMK2N1	0.149785	6.9562	1.8379	0.0753531	0.999382	-4.05713
LOC646139	-0.148799	6.90141	-1.83759	0.0753992	0.999382	-4.0575
TEX28	0.154291	6.91785	1.83749	0.0754142	0.999382	-4.05762
LOC647888	0.161826	6.9105	1.8373	0.0754426	0.999382	-4.05785
SPATA6	0.113582	6.78097	1.83729	0.0754445	0.999382	-4.05786
C6orf170	-0.129796	7.22876	-1.83692	0.0755004	0.999382	-4.05831
LOC646438	0.116555	6.9378	1.83663	0.0755442	0.999382	-4.05866
LOC196993	0.118804	7.01307	1.8366	0.0755495	0.999382	-4.0587
FUNDC2	-0.147479	7.06646	-1.83641	0.0755781	0.999382	-4.05893
MED17	0.103688	7.18159	1.83634	0.0755881	0.999382	-4.05901
LOC642044	-0.13814	6.8764	-1.83618	0.0756127	0.999382	-4.05921
AOX1	-0.124132	6.80868	-1.83586	0.0756615	0.999382	-4.0596
LOC100129831	-0.13763	6.95999	-1.83575	0.0756789	0.999382	-4.05974
LOC100133607	-0.224387	12.4037	-1.8353	0.0757463	0.999382	-4.06028
FLJ37512	-0.118075	6.89026	-1.83488	0.0758104	0.999382	-4.06079
PPP1R13L	-0.107938	7.12389	-1.83437	0.0758875	0.999382	-4.0614
LOC649086	0.119793	6.95023	1.83417	0.0759177	0.999382	-4.06164
LOC644914	-0.13684	12.5243	-1.83399	0.0759462	0.999382	-4.06187
TLE1	-0.123462	7.89333	-1.83374	0.0759834	0.999382	-4.06216
MAP3K8	-0.139409	7.1584	-1.83341	0.0760345	0.999382	-4.06257
PDLIM2	-0.121206	6.80071	-1.83333	0.0760465	0.999382	-4.06266
UGT1A9	-0.142244	7.00598	-1.83284	0.0761213	0.999382	-4.06326
CALML4	-0.121611	7.50493	-1.8328	0.0761267	0.999382	-4.0633
LOC100130100	0.113045	6.91902	1.83228	0.076206	0.999382	-4.06393
TANK	-0.153829	9.22791	-1.83224	0.0762121	0.999382	-4.06398
DENND5A	0.119121	8.90639	1.83204	0.0762432	0.999382	-4.06422
DNAH17	-0.111594	6.78682	-1.83201	0.0762478	0.999382	-4.06426
CATSPER2P1	-0.116852	7.17274	-1.83193	0.0762591	0.999382	-4.06435
LIPL4	-0.129064	7.05862	-1.83176	0.0762853	0.999382	-4.06456
LOC642528	0.126325	7.06075	1.83168	0.0762981	0.999382	-4.06466
CRCP	-0.318115	9.69684	-1.83158	0.0763134	0.999382	-4.06478
ANK1	0.100323	6.88527	1.83147	0.0763303	0.999382	-4.06491
LOC653602	0.133387	6.9033	1.83133	0.0763518	0.999382	-4.06508
POLDIP3	0.146425	9.65425	1.83116	0.0763773	0.999382	-4.06528
LOC493754	-0.127108	7.2304	-1.83094	0.0764103	0.999382	-4.06554
ASIP	0.117294	6.72254	1.83066	0.0764542	0.999382	-4.06589
LOC100130648	0.138232	6.92609	1.83002	0.0765522	0.999382	-4.06666
LOC644144	-0.123646	7.09381	-1.82968	0.0766037	0.999382	-4.06707
D4S234E	-0.12681	6.82083	-1.82848	0.0767881	0.999382	-4.06852
MBD1	0.138028	7.67349	1.82827	0.0768202	0.999382	-4.06877
SDR42E1	-0.139287	7.04269	-1.82799	0.076864	0.999382	-4.06911
VCX3B	0.138189	6.89669	1.82791	0.0768764	0.999382	-4.06921
TRAF6	0.145749	7.80586	1.8279	0.0768773	0.999382	-4.06922
LOC646003	-0.130303	6.93942	-1.82782	0.0768892	0.999382	-4.06931
LOC100128190	-0.116063	6.89114	-1.82755	0.0769317	0.999382	-4.06965
ASB13	-0.143116	8.05923	-1.82704	0.077009	0.999382	-4.07025
FLJ21511	0.14944	6.77126	1.82678	0.0770499	0.999382	-4.07057
YBX2	0.134561	6.99609	1.82662	0.0770739	0.999382	-4.07076
APOA1	0.128897	7.05573	1.82636	0.0771141	0.999382	-4.07107
PTPRV	-0.104714	6.84682	-1.82633	0.0771184	0.999382	-4.07111
LOC645126	0.132448	6.99614	1.82613	0.0771502	0.999382	-4.07136
LOC647868	-0.124787	6.84487	-1.8261	0.077154	0.999382	-4.07139
LOC440348	-0.156869	7.45476	-1.82529	0.07728	0.999382	-4.07237
EVI1	0.130613	6.75875	1.82518	0.0772964	0.999382	-4.0725
LOC649088	0.129495	6.95413	1.82505	0.077317	0.999382	-4.07266
MYEOV2	0.127172	6.8643	1.82441	0.0774156	0.999382	-4.07343
C22orf36	0.128856	6.80856	1.82438	0.0774202	0.999382	-4.07346
LOC643032	0.148517	7.079	1.82426	0.0774384	0.999382	-4.07361
KRTAP21-2	-0.114049	6.94442	-1.82419	0.0774497	0.999382	-4.07369
LOC286528	0.139277	6.95743	1.8241	0.0774629	0.999382	-4.0738
ZNF652	-0.244924	9.07122	-1.82374	0.0775184	0.999382	-4.07423
PFN1	0.129518	14.6321	1.82366	0.0775309	0.999382	-4.07433
LOC400807	0.109165	7.04292	1.82322	0.0775993	0.999382	-4.07486
C17orf75	0.132722	6.96143	1.82265	0.0776882	0.999382	-4.07555
DIP2A	-0.164802	7.60415	-1.82215	0.0777657	0.999382	-4.07615
KCNJ1	-0.112571	6.99414	-1.82183	0.077816	0.999382	-4.07654
LOC644748	-0.123367	6.93138	-1.82177	0.0778254	0.999382	-4.07661
DSCAML1	0.160898	6.88468	1.82168	0.077839	0.999382	-4.07672
HEMK1	-0.125282	7.08346	-1.82138	0.0778851	0.999382	-4.07707
ATP2A3	0.145063	7.69754	1.82119	0.0779148	0.999382	-4.0773
LOC653225	-0.126405	6.89776	-1.82114	0.0779232	0.999382	-4.07737
MYST4	-0.138114	6.89716	-1.82086	0.0779669	0.999382	-4.07771
C17orf97	0.140373	9.37635	1.82085	0.077968	0.999382	-4.07771
MID1	-0.104163	7.03516	-1.82049	0.0780245	0.999382	-4.07815
CCNB3	-0.142801	6.93291	-1.82018	0.0780714	0.999382	-4.07851
LOC649397	-0.151587	7.08524	-1.82004	0.0780946	0.999382	-4.07869
MAGEF1	0.141015	7.25169	1.81995	0.0781078	0.999382	-4.07879
LOC729537	0.111859	6.99144	1.81994	0.0781093	0.999382	-4.07881
LOC149448	0.120265	7.88881	1.81994	0.0781094	0.999382	-4.07881
FLJ41733	0.117732	7.03421	1.8199	0.0781164	0.999382	-4.07886
MIR9-1	-0.162695	7.00663	-1.81989	0.0781166	0.999382	-4.07886
LOC642656	0.112532	6.84586	1.81962	0.0781595	0.999382	-4.07919
RNF138P1	-0.133751	6.86613	-1.81958	0.0781649	0.999382	-4.07923
YSK4	0.105632	6.97884	1.81778	0.0784469	0.999382	-4.0814
UCKL1OS	0.121997	6.93533	1.81778	0.0784473	0.999382	-4.08141
LOC100128993	-0.151199	6.82836	-1.81767	0.0784645	0.999382	-4.08154
OAS1	0.129481	7.44119	1.81752	0.0784872	0.999382	-4.08171
MIR184	0.109427	6.90534	1.81748	0.0784943	0.999382	-4.08177
LOC100130176	-0.130098	6.85773	-1.81742	0.0785037	0.999382	-4.08184
CUZD1	0.112542	7.01009	1.81699	0.0785697	0.999382	-4.08235
LOC645381	-0.115225	7.56403	-1.81686	0.0785914	0.999382	-4.08251
LOC401387	-0.1388	6.89515	-1.81671	0.0786147	0.999382	-4.08269
FAT4	-0.130551	7.04384	-1.81612	0.078707	0.999382	-4.0834
LOC652086	0.165417	6.87156	1.81595	0.0787341	0.999382	-4.08361
CTGLF3	-0.12985	8.2938	-1.8159	0.0787417	0.999382	-4.08366
DPY19L2	0.126155	6.7151	1.81559	0.0787904	0.999382	-4.08404
AQP6	0.12314	6.92444	1.81536	0.0788255	0.999382	-4.08431
LOC100132391	-0.336164	9.34079	-1.81499	0.0788844	0.999382	-4.08476
C9orf38	-0.126572	7.06258	-1.81473	0.0789254	0.999382	-4.08507
LOC643856	-0.147379	9.36164	-1.81469	0.0789319	0.999382	-4.08512
FLJ16793	0.126976	7.05015	1.81454	0.0789551	0.999382	-4.08529
LOC647841	-0.123702	6.95818	-1.81417	0.0790131	0.999382	-4.08574
TNFSF12	-0.111327	6.95577	-1.8141	0.0790244	0.999382	-4.08582
FKBP15	0.130248	7.87007	1.81395	0.0790478	0.999382	-4.086
[truncated: 29,427 more rows]

## Sheet: 6h
	logFC	AveExpr	t	P.Value	adj.P.Val	B
JUN	4.95007	8.78965	58.5422	3.45896e-34	1.08701e-29	48.1563
EGR1	3.19314	8.63448	36.3446	1.20766e-27	1.8976e-23	42.8358
ATF3	3.22771	8.3195	34.9925	3.95891e-27	4.14709e-23	42.2719
DUSP1	1.89943	7.77483	26.3803	2.53648e-23	1.99278e-19	37.4145
CCL3	1.83119	7.70337	22.8444	2.04552e-21	1.28565e-17	34.536
BTG2	1.94248	7.95323	19.587	2.06394e-19	1.08103e-15	31.2182
IL1B	2.56488	7.81291	19.1863	3.80825e-19	1.70969e-15	30.757
IL8	3.30985	11.3705	19.0262	4.87831e-19	1.91632e-15	30.5692
SLC25A24	2.00136	8.04416	18.0093	2.45485e-18	8.57179e-15	29.3257
CCL3L3	1.68518	8.05994	16.4881	3.18521e-17	9.20082e-14	27.2919
RNU6-1	2.1442	11.3344	16.4818	3.22055e-17	9.20082e-14	27.283
RNU6-15	2.08986	11.3146	15.7259	1.23629e-16	3.23763e-13	26.1873
CCL3L1	1.37597	7.81053	15.4738	1.95824e-16	4.73382e-13	25.8084
ZFP36	1.57055	10.7709	15.2776	2.81221e-16	6.31261e-13	25.5089
RNU6ATAC	1.32671	7.48331	14.9584	5.10581e-16	1.0697e-12	25.0124
PPP1R15A	1.21479	9.96906	14.8129	6.72291e-16	1.32046e-12	24.7823
RPPH1	1.16075	8.68512	14.5741	1.06048e-15	1.96039e-12	24.3995
IER2	1.06986	8.15529	14.5022	1.21807e-15	2.12661e-12	24.2827
CYP4B1	0.880441	7.25874	12.8775	3.20053e-14	5.29368e-11	21.4803
ALB	0.968511	7.61058	12.1144	1.64185e-13	2.57983e-10	20.0463
RNU1G2	1.76458	10.2601	12.0666	1.82315e-13	2.7219e-10	19.9538
PLAU	0.869021	9.87767	12.0465	1.90548e-13	2.7219e-10	19.9148
IER3	1.08779	8.23572	11.9776	2.21729e-13	3.00603e-10	19.7807
TRIB1	0.989313	8.30789	11.9618	2.2957e-13	3.00603e-10	19.7499
RNU1-3	1.83049	10.3732	11.9086	2.58215e-13	3.24587e-10	19.6458
RNU4ATAC	0.863277	7.63118	11.8292	3.07837e-13	3.7208e-10	19.4899
DUSP2	0.80207	8.24482	11.5711	5.48337e-13	6.38224e-10	18.9764
FOS	1.1268	8.84493	11.4843	6.67138e-13	7.48767e-10	18.8015
LOC338758	1.04543	7.52409	11.4	8.07573e-13	8.7513e-10	18.6308
RNU1-5	1.83291	10.6063	11.0105	1.97608e-12	2.07001e-09	17.8284
TNFAIP3	0.80054	7.78391	10.7382	3.73646e-12	3.78781e-09	17.2541
NFKBIA	1.14227	10.3877	10.7186	3.91325e-12	3.84306e-09	17.2123
MIR302C	0.925015	7.4102	10.5803	5.42916e-12	5.17021e-09	16.9161
TNFSF9	0.953183	8.14615	10.4458	7.48247e-12	6.916e-09	16.6253
RNU1F1	1.44809	9.49834	10.3396	9.65454e-12	8.66868e-09	16.3938
RN7SK	1.93003	10.4694	9.9633	2.41084e-11	2.10453e-08	15.5596
SNORD104	0.966161	8.73742	9.84797	3.2032e-11	2.72064e-08	15.2997
PHLDA1	1.04004	7.5811	9.80536	3.55933e-11	2.94356e-08	15.2032
OBFC2A	0.650073	9.00026	9.76334	3.95023e-11	3.18308e-08	15.1077
SNORD13	1.03491	8.57215	9.55685	6.61394e-11	5.19624e-08	14.6347
RNU1A3	1.59519	10.4351	9.5368	6.95543e-11	5.33125e-08	14.5884
CD83	0.62647	8.77946	9.43908	8.89634e-11	6.5913e-08	14.362
KIAA1666	1.0435	7.89391	9.43366	9.01884e-11	6.5913e-08	14.3494
MAFF	0.769078	7.32075	9.19137	1.66952e-10	1.19242e-07	13.7816
JUND	0.569768	12.815	8.97092	2.94329e-10	2.02976e-07	13.2573
TIPARP	1.10981	9.64856	8.96729	2.97108e-10	2.02976e-07	13.2486
PTGER4	0.94129	9.11799	8.95649	3.05526e-10	2.04287e-07	13.2227
OSM	0.961472	7.55968	8.92661	3.30112e-10	2.16127e-07	13.151
RNU4-2	1.4886	9.19331	8.73059	5.50054e-10	3.52775e-07	12.6774
PLIN2	0.687744	9.66489	8.56199	8.5677e-10	5.38497e-07	12.2655
C19orf48	0.572286	11.7679	8.47613	1.07519e-09	6.62525e-07	12.0541
PTGS2	0.585825	7.52162	8.3416	1.53752e-09	9.29194e-07	11.7208
SERTAD1	0.763902	9.12524	7.88907	5.2064e-09	3.0871e-06	10.5805
ARL4A	0.594308	9.19886	7.61771	1.09483e-08	6.37152e-06	9.88323
HBEGF	0.641728	7.95707	7.49898	1.51967e-08	8.68314e-06	9.57511
NAT9	0.439492	8.86307	7.46318	1.67812e-08	9.41724e-06	9.48185
ZNF17	0.491278	8.52243	7.41484	1.91906e-08	1.05804e-05	9.35565
HIST2H2BE	0.556356	7.24787	7.28579	2.74896e-08	1.48946e-05	9.01735
MCL1	0.506047	9.28005	7.23757	3.14549e-08	1.67543e-05	8.89043
ZC3HAV1	-0.539682	10.0585	-7.01724	5.84017e-08	3.05889e-05	8.30698
RANBP6	0.473579	8.11208	6.9942	6.2323e-08	3.21076e-05	8.24566
MIR320A	0.385411	7.07637	6.97032	6.66696e-08	3.37929e-05	8.18203
RNU11	0.42899	7.26078	6.86973	8.86158e-08	4.42038e-05	7.91335
AXUD1	0.523136	7.83984	6.86246	9.0461e-08	4.44192e-05	7.89388
CDKN1A	0.92714	12.3653	6.85393	9.26754e-08	4.48064e-05	7.87104
SLC25A25	0.465683	8.3264	6.61656	1.82114e-07	8.66072e-05	7.2325
DDIT3	0.515808	7.75505	6.61173	1.84646e-07	8.66072e-05	7.21944
TXNIP	0.921026	10.9764	6.56319	2.12132e-07	9.80364e-05	7.08816
YRDC	0.516075	10.2744	6.46402	2.81825e-07	0.000128357	6.81933
C5orf21	-0.447637	9.29837	-6.39525	3.43346e-07	0.000154143	6.6324
KLF6	0.681854	8.47446	6.29905	4.52815e-07	0.000200425	6.37031
BRD2	0.447675	11.7074	6.24165	5.34288e-07	0.000233202	6.21357
RASSF1	0.373844	9.34401	6.08879	8.30943e-07	0.000357271	5.79506
SNORA63	0.506859	7.63259	6.08451	8.41279e-07	0.000357271	5.78335
FAM53C	0.648354	10.3647	6.00001	1.07454e-06	0.000450245	5.55135
NFE2L2	0.587007	9.97356	5.94057	1.27665e-06	0.000527897	5.38793
IL23A	0.526059	7.35158	5.8363	1.72801e-06	0.000705251	5.10086
NFKBIZ	0.455134	7.33663	5.78713	1.99349e-06	0.000803172	4.96531
SNORD68	0.523604	8.53017	5.74787	2.23456e-06	0.000888904	4.85703
MXD1	0.477459	8.60481	5.6047	3.38992e-06	0.00133165	4.46172
SUMF1	-0.376893	8.75561	-5.58423	3.59816e-06	0.00137962	4.40517
JUNB	0.410149	7.49564	5.58407	3.59984e-06	0.00137962	4.40473
ATF4	0.472868	12.9973	5.56228	3.83585e-06	0.00145235	4.3445
BRF2	0.46584	9.3966	5.45222	5.28638e-06	0.00197773	4.04026
ZNF7	0.382654	9.04153	5.28677	8.5635e-06	0.00316608	3.58277
ZNF16	0.345895	8.65424	5.25084	9.50901e-06	0.00347477	3.48347
DDX3X	-0.388878	10.331	-5.22206	1.03413e-05	0.00370459	3.40391
HIST2H2AA3	0.771872	8.88624	5.22098	1.03737e-05	0.00370459	3.40094
CCL4L2	0.360003	7.11999	5.17598	1.18275e-05	0.00417631	3.2766
TP53RK	0.288929	9.8067	5.13929	1.31622e-05	0.00459595	3.17525
TMEM107	0.350692	7.52687	5.12208	1.38389e-05	0.00477912	3.12773
SNHG9	0.417549	10.0336	5.09812	1.48392e-05	0.00506887	3.06158
HIST2H3C	0.350432	6.99646	5.08513	1.54117e-05	0.00515073	3.0257
HIST2H2AC	0.432425	8.9931	5.08077	1.56085e-05	0.00515073	3.01367
SNORA80	0.444391	7.29158	5.07851	1.57114e-05	0.00515073	3.00745
RPL10L	0.412628	7.11008	5.07801	1.57344e-05	0.00515073	3.00606
EGR2	0.353219	7.05061	5.00611	1.93978e-05	0.00622502	2.80773
DDX28	0.360857	9.07247	5.00585	1.94123e-05	0.00622502	2.80702
LOC728835	0.343049	7.04284	4.93011	2.41964e-05	0.00768076	2.59834
FAM172A	-0.353866	7.7905	-4.91377	2.5373e-05	0.00797373	2.55337
RNU4-1	0.650327	7.675	4.90885	2.5739e-05	0.00800864	2.53981
RHOB	0.334136	7.0299	4.88867	2.72934e-05	0.00840904	2.48429
INTS6	0.389535	10.0128	4.87718	2.82197e-05	0.00861001	2.45269
LOC100133667	-0.271145	7.09817	-4.85045	3.04969e-05	0.00921533	2.37921
PHTF1	-0.350643	8.91021	-4.84635	3.0862e-05	0.00923686	2.36795
SNORA57	0.384657	7.41742	4.81644	3.36609e-05	0.0099795	2.28577
IFRD1	0.309813	8.41718	4.8032	3.49797e-05	0.0102736	2.2494
ATXN1	-0.262774	8.4309	-4.79452	3.58715e-05	0.010438	2.22557
SMG5	0.354473	10.2799	4.76922	3.86012e-05	0.0111292	2.15618
PSCDBP	0.565139	8.73977	4.75607	4.01011e-05	0.0114565	2.12011
ERF	0.412008	8.19647	4.73936	4.20902e-05	0.0119165	2.07431
DUSP5	0.306425	7.73876	4.73143	4.3068e-05	0.0120844	2.05258
ZNF263	0.297258	9.40864	4.68452	4.93329e-05	0.0137198	1.92413
IL1A	0.284457	6.87089	4.66444	5.22821e-05	0.0144124	1.86923
C1orf55	0.367043	9.29633	4.65869	5.31586e-05	0.0144408	1.85351
ZNF697	0.312056	7.40824	4.65775	5.33042e-05	0.0144408	1.85092
C10orf2	0.300815	9.16944	4.64805	5.48201e-05	0.0147246	1.82441
SNORA67	0.476352	8.81297	4.62985	5.77808e-05	0.0153883	1.77469
SNORD3D	0.961115	9.24866	4.62078	5.93139e-05	0.0156638	1.74993
TNF	0.505099	10.3019	4.61226	6.07914e-05	0.0158312	1.72668
FOSB	0.346585	7.0977	4.61133	6.09553e-05	0.0158312	1.72413
SNORD3A	0.578923	8.4501	4.58031	6.66644e-05	0.0169735	1.63953
LOC653604	0.416084	7.32487	4.57928	6.6862e-05	0.0169735	1.63673
LOC100130100	0.282489	6.91902	4.57871	6.69737e-05	0.0169735	1.63516
RRAD	0.297426	7.03369	4.55048	7.26521e-05	0.0182653	1.55827
NFKBIE	0.365409	8.91723	4.52573	7.8023e-05	0.0193816	1.49091
LOC440926	-0.309379	13.9417	-4.52439	7.83256e-05	0.0193816	1.48725
HIST2H4A	0.342053	7.43878	4.50565	8.26672e-05	0.0202961	1.43631
KTI12	0.338715	9.59739	4.49893	8.42816e-05	0.0205321	1.41804
DUSP10	0.362215	7.71243	4.49122	8.61715e-05	0.020831	1.39711
ZNF227	0.302646	8.00647	4.47894	8.92708e-05	0.0214154	1.36375
FOXO3	0.323193	9.9603	4.47101	9.13284e-05	0.0217431	1.34224
ZNF529	0.31174	8.39566	4.44932	9.7203e-05	0.0229677	1.2834
KBTBD8	0.330668	8.9646	4.44621	9.80747e-05	0.0230007	1.27498
BAG5	0.260444	9.77554	4.43929	0.000100044	0.0232888	1.25621
HNRNPA0	-0.267183	10.8865	-4.43403	0.000101567	0.0234696	1.24196
CIRBP	-0.313234	11.506	-4.42733	0.000103538	0.0237503	1.22382
RBM15	0.28828	9.68998	4.40416	0.000110657	0.0251993	1.16109
PDRG1	0.394847	9.06134	4.40049	0.000111827	0.0252825	1.15118
FBXO31	0.262401	8.5382	4.38906	0.000115553	0.0259383	1.12026
LDLR	0.413899	11.1382	4.35512	0.000127354	0.0283845	1.02857
ZBTB48	0.273532	8.7604	4.35069	0.000128978	0.0285441	1.01662
C16orf74	-0.419127	7.76316	-4.3471	0.00013031	0.0286371	1.00694
PMAIP1	0.389066	7.86967	4.34265	0.000131979	0.0288026	0.994938
HIST1H3H	0.29648	7.09907	4.33224	0.000135967	0.0294684	0.966875
NGRN	0.250268	10.723	4.32843	0.000137459	0.0295877	0.956589
AMMECR1L	0.271933	8.05141	4.30602	0.000146549	0.0313297	0.896246
PROCR	-0.313218	7.62746	-4.29141	0.000152795	0.0322956	0.856924
TMTC4	-0.289128	8.41756	-4.29066	0.000153123	0.0322956	0.854905
CCNB2	-0.250947	11.4693	-4.27642	0.000159472	0.0334104	0.816639
CPVL	-0.290195	10.7425	-4.27295	0.000161058	0.0334215	0.807319
MAP1LC3B	0.289877	8.66067	4.27166	0.000161652	0.0334215	0.803852
HIST1H2BG	0.282348	7.06537	4.22729	0.00018344	0.0376784	0.684794
ARC	0.251968	6.93995	4.19714	0.000199868	0.0407861	0.604074
RDH14	0.254672	10.242	4.17831	0.000210852	0.0426834	0.553745
CLDN23	-0.249479	8.57054	-4.17659	0.000211882	0.0426834	0.549158
FEM1C	0.25671	8.64979	4.15938	0.000222495	0.0445358	0.503192
C14orf169	0.247454	9.62394	4.13201	0.000240443	0.0474631	0.430245
C20orf177	-0.438772	9.0802	-4.13168	0.00024067	0.0474631	0.429358
TMED4	-0.311119	9.22792	-4.13025	0.00024165	0.0474631	0.425539
ALKBH1	0.300954	8.51335	4.09208	0.000269215	0.0525487	0.324025
C1orf69	0.290824	7.45132	4.07802	0.00028013	0.0543418	0.286687
PLD6	0.404338	11.1462	4.05789	0.000296507	0.0569572	0.233327
C7orf40	0.242079	10.2642	4.05702	0.000297237	0.0569572	0.231018
C16orf52	-0.238053	7.47562	-4.04445	0.000307967	0.0586556	0.19772
CHIC2	0.263992	10.0249	4.04023	0.000311656	0.0590006	0.186544
BRI3BP	-0.260164	10.5365	-4.0368	0.000314679	0.0592161	0.177482
RBBP4	-0.282137	8.74176	-4.02389	0.000326334	0.0610439	0.143345
SLC15A4	-0.271412	10.017	-4.01514	0.000334473	0.0621961	0.120227
LOC641744	0.2281	6.98664	4.00465	0.000344501	0.0636841	0.0925085
GRWD1	0.29167	10.6077	3.98962	0.000359371	0.0660445	0.0528648
TMCO3	-0.234704	8.32134	-3.95179	0.000399627	0.0730156	-0.0466947
TAF15	-0.394636	11.1351	-3.93816	0.000415189	0.075091	-0.0825004
RDH10	0.311175	9.54439	3.93767	0.000415765	0.075091	-0.0837996
C20orf3	-0.256381	9.96608	-3.92992	0.000424891	0.0762277	-0.104146
HIST2H2AA4	0.454545	8.90979	3.92822	0.00042691	0.0762277	-0.108588
LOC644297	-0.224593	6.92503	-3.9131	0.000445361	0.079073	-0.148228
IDH1	-0.269928	11.3177	-3.90706	0.000452955	0.0799695	-0.164065
SQSTM1	0.355491	12.23	3.89026	0.00047472	0.0830888	-0.208015
RPP38	0.311132	7.74991	3.88937	0.000475911	0.0830888	-0.210362
GHITM	-0.218963	13.1234	-3.87057	0.000501538	0.0870792	-0.259462
SEL1L3	-0.243251	10.0539	-3.8594	0.000517401	0.0892084	-0.288605
LMNB1	-0.288998	10.686	-3.85797	0.000519479	0.0892084	-0.292355
ZNF671	0.320849	8.08303	3.85461	0.000524355	0.0895563	-0.301098
CALM1	-0.270771	10.0729	-3.84514	0.000538377	0.0911521	-0.325789
PPRC1	0.293225	9.4153	3.84439	0.000539499	0.0911521	-0.327737
PLK2	0.313461	7.09435	3.83845	0.000548497	0.0921769	-0.343211
MARS2	0.350403	8.9165	3.81927	0.000578539	0.0967084	-0.393082
STARD8	-0.249435	8.39028	-3.81608	0.000583692	0.0970535	-0.401374
FBXO3	-0.25093	7.75983	-3.80792	0.000597076	0.0987564	-0.422569
SCARNA27	0.361334	7.21646	3.7971	0.000615279	0.101234	-0.45064
ARL5B	0.239805	7.5709	3.79191	0.000624204	0.102168	-0.4641
CYP1B1	0.423463	12.1906	3.7883	0.000630488	0.102662	-0.473461
ELOVL1	0.26294	8.25622	3.78457	0.00063704	0.102842	-0.483121
NOB1	0.252764	8.71069	3.78394	0.00063814	0.102842	-0.484734
STK17B	0.289302	8.34657	3.76686	0.000669061	0.10689	-0.528939
MKI67IP	0.242056	11.0859	3.76632	0.000670063	0.10689	-0.530337
KIAA1826	0.243046	9.14149	3.76059	0.000680776	0.107586	-0.545152
RMI1	0.238672	9.85316	3.76033	0.000681268	0.107586	-0.545826
DYNLL1	0.23138	12.7046	3.75506	0.000691279	0.108621	-0.55945
ACOX2	-0.298067	7.35112	-3.75079	0.000699487	0.109364	-0.570472
ZNF146	0.373387	10.6011	3.74439	0.000711971	0.110764	-0.586989
C19orf52	0.211928	9.10868	3.74187	0.000716937	0.110987	-0.593478
ZNF193	0.241705	8.07541	3.73714	0.000726368	0.111896	-0.605678
SEPSECS	0.231488	7.66845	3.71869	0.000764325	0.117169	-0.653216
AK3	-0.256645	9.89754	-3.71551	0.000771048	0.117626	-0.661387
HIST1H4K	0.224582	8.13402	3.70853	0.000786043	0.118819	-0.679356
NT5DC2	-0.378454	8.74099	-3.70835	0.00078643	0.118819	-0.679816
HIST1H2BJ	0.236183	7.31521	3.69605	0.000813538	0.122326	-0.711426
CYFIP1	-0.252721	8.89157	-3.68661	0.000834933	0.124707	-0.735633
SNHG1	0.382111	10.716	3.68558	0.000837308	0.124707	-0.738282
LOC648638	0.265113	9.0631	3.68337	0.000842413	0.124876	-0.743949
ENTPD4	-0.241514	7.38576	-3.67636	0.000858817	0.12671	-0.761928
TM7SF3	-0.32405	8.8124	-3.66338	0.000889985	0.130469	-0.795156
CASC1	-0.243776	6.74824	-3.66078	0.000896359	0.130469	-0.801806
HERPUD1	-0.34272	9.84233	-3.6601	0.000898036	0.130469	-0.803548
KLF9	0.252031	8.47593	3.65894	0.000900905	0.130469	-0.806521
CORO2A	-0.284142	9.30108	-3.65679	0.000906245	0.130641	-0.812028
PPP1R13L	-0.214194	7.12389	-3.64017	0.000948503	0.135613	-0.854486
SNORA6	0.273887	7.88132	3.63984	0.000949367	0.135613	-0.855334
ANKRD46	-0.259184	9.48954	-3.63658	0.000957883	0.13621	-0.863652
ZNF830	0.259802	8.0555	3.62865	0.000978908	0.138087	-0.883871
NFX1	0.336857	9.92894	3.62701	0.000983325	0.138087	-0.888063
INO80	0.240261	8.46953	3.62666	0.000984266	0.138087	-0.888954
MIR1275	0.314447	7.17014	3.60961	0.00103124	0.143121	-0.932358
CALU	-0.318293	8.8636	-3.60937	0.00103191	0.143121	-0.93296
ZFP36L2	-0.295924	9.41461	-3.60831	0.00103493	0.143121	-0.935677
NFIL3	0.241357	8.50077	3.60709	0.00103837	0.143121	-0.938763
RNMTL1	0.288464	10.7181	3.60231	0.00105202	0.14437	-0.950919
ANG	-0.296098	7.75222	-3.58835	0.0010929	0.149005	-0.986388
C17orf90	0.25011	10.0417	3.58724	0.00109621	0.149005	-0.989203
GORASP2	-0.217343	9.81271	-3.58597	0.00110002	0.149005	-0.992432
ZNF20	0.267081	7.89969	3.57614	0.00112991	0.151641	-1.01737
SP3	0.231278	9.11457	3.5761	0.00113003	0.151641	-1.01746
EDEM1	-0.259545	8.65956	-3.57482	0.00113396	0.151641	-1.02069
RGS2	0.575763	8.2653	3.56495	0.00116487	0.155033	-1.0457
HDHD1A	-0.238476	8.45099	-3.56202	0.0011742	0.155033	-1.05312
CCNL1	0.282228	8.75043	3.56174	0.0011751	0.155033	-1.05383
RAB10	-0.20651	11.6883	-3.56051	0.00117905	0.155033	-1.05695
RNF26	-0.214297	8.29017	-3.55591	0.00119388	0.156329	-1.06857
HSPB6	0.269277	6.91156	3.55406	0.00119991	0.156467	-1.07325
ZEB2	0.296667	8.49706	3.54502	0.00122976	0.158595	-1.09609
RIOK1	0.216985	9.59218	3.54353	0.00123475	0.158595	-1.09985
C10orf28	0.229927	8.11512	3.54249	0.00123825	0.158595	-1.10248
RSBN1	0.223655	8.93045	3.54152	0.00124151	0.158595	-1.10492
IL8RB	-0.268991	7.71061	-3.54074	0.00124416	0.158595	-1.1069
C18orf55	-0.230332	11.5612	-3.54004	0.00124651	0.158595	-1.10866
CCDC58	-0.321914	8.93869	-3.53523	0.00126291	0.159879	-1.1208
SNORD35A	0.277934	7.19743	3.53366	0.00126831	0.159879	-1.12476
ZNF142	0.281566	9.32716	3.53263	0.00127187	0.159879	-1.12736
CCDC59	0.216327	11.341	3.52847	0.0012863	0.161049	-1.13784
AGPAT5	-0.298485	9.72421	-3.52002	0.00131613	0.163009	-1.15914
AMD1	-0.249442	11.2551	-3.51866	0.00132099	0.163009	-1.16256
GAB2	0.223348	8.82394	3.51758	0.00132486	0.163009	-1.16528
KIAA1737	0.237515	9.00816	3.51653	0.00132865	0.163009	-1.16793
PPM1B	0.193146	10.0105	3.51463	0.0013355	0.163009	-1.17271
SNRPD3	-0.353352	8.44239	-3.51356	0.00133938	0.163009	-1.1754
TSNAX	-0.307261	10.0533	-3.51255	0.00134306	0.163009	-1.17794
CHRNA1	-0.239976	7.10241	-3.51244	0.00134345	0.163009	-1.17822
MRPS18A	0.292772	9.86814	3.50757	0.0013613	0.16454	-1.19047
GCC1	0.294875	8.70785	3.50512	0.00137034	0.164658	-1.19661
C10orf110	-0.188719	6.99187	-3.50447	0.00137276	0.164658	-1.19825
EED	0.378319	8.42077	3.49985	0.00139005	0.166097	-1.20986
RRN3	0.328267	9.23562	3.49272	0.0014171	0.168244	-1.22775
DCK	-0.23887	9.88453	-3.4923	0.00141872	0.168244	-1.22881
CUL5	-0.221914	9.35326	-3.4866	0.00144078	0.170218	-1.24313
HIST1H4H	0.311234	7.34485	3.48492	0.00144733	0.170351	-1.24733
MRC1L1	-0.208031	6.73611	-3.47651	0.00148057	0.173561	-1.2684
LOC727737	0.225656	7.02863	3.4745	0.00148863	0.173561	-1.27344
ZNF343	0.258812	8.15247	3.47336	0.00149322	0.173561	-1.27629
ARL1	-0.242171	9.40477	-3.47152	0.00150065	0.173561	-1.2809
SDHC	-0.263512	10.6932	-3.47114	0.00150221	0.173561	-1.28186
LOC644592	0.252752	6.97567	3.46109	0.00154348	0.177366	-1.30699
LOC644450	0.227566	6.89945	3.46038	0.00154643	0.177366	-1.30876
FAM72A	0.267011	7.81529	3.45852	0.00155422	0.17761	-1.31342
CCRN4L	0.237477	9.28958	3.45482	0.0015698	0.178741	-1.32266
RNFT2	-0.239585	7.83012	-3.45178	0.00158269	0.179558	-1.33024
ZNF295	0.245278	7.75585	3.44569	0.00160888	0.181381	-1.34546
MAK16	0.27345	10.7097	3.44536	0.0016103	0.181381	-1.34627
PDIA4	-0.24778	8.00774	-3.43948	0.001636	0.183618	-1.36095
ORMDL2	-0.299947	7.47883	-3.43381	0.00166113	0.185775	-1.37507
SNX11	0.211246	9.83383	3.43132	0.0016723	0.186361	-1.38128
AHCTF1	0.205097	8.91574	3.42339	0.00170831	0.189701	-1.40101
C17orf42	0.229157	9.93668	3.41906	0.00172831	0.191246	-1.41179
ZNF670	0.220789	7.62911	3.40329	0.00180297	0.198808	-1.45094
RDX	0.247743	8.15557	3.39622	0.00183746	0.20131	-1.46848
SLC30A1	0.233691	7.78308	3.39602	0.00183847	0.20131	-1.46899
STOM	-0.235989	11.0051	-3.39464	0.00184529	0.201355	-1.47241
LOC441874	0.243742	6.9478	3.38477	0.00189468	0.206029	-1.49685
LOC649429	0.220012	6.97432	3.38265	0.00190544	0.206484	-1.50209
LOC100128304	-0.232076	7.35088	-3.37409	0.0019496	0.210046	-1.52328
ZNF296	0.368369	9.98553	3.37369	0.00195168	0.210046	-1.52426
CEBPD	0.360497	11.8159	3.37124	0.00196449	0.210703	-1.53031
PIM1	-0.338844	8.19349	-3.36696	0.00198706	0.211837	-1.54088
LOC100130233	0.287486	7.19573	3.36578	0.00199336	0.211837	-1.5438
TPST2	-0.24105	9.84587	-3.36541	0.00199529	0.211837	-1.54469
ZNF225	0.205035	7.40875	3.35465	0.00205344	0.217278	-1.57125
EFR3A	-0.185299	11.2922	-3.35108	0.00207311	0.218622	-1.58006
SAT1	0.410277	10.7213	3.33655	0.0021549	0.226488	-1.61581
GPSM2	-0.211418	8.59645	-3.33147	0.00218423	0.228367	-1.62829
LOC647199	0.210411	7.04977	3.33009	0.00219225	0.228367	-1.63168
LOC728912	0.195745	6.99526	3.3297	0.00219458	0.228367	-1.63266
PARP11	-0.1765	7.34763	-3.32302	0.00223386	0.231211	-1.64904
SHOC2	0.224857	9.18443	3.32256	0.00223662	0.231211	-1.65018
ACOT9	-0.241018	8.58651	-3.32061	0.00224824	0.23165	-1.65497
SLC25A43	-0.24173	9.11886	-3.31853	0.00226068	0.232171	-1.66006
LOC100132299	-0.214556	9.62807	-3.31551	0.0022789	0.233279	-1.66747
ETAA1	0.190711	6.85123	3.30857	0.00232126	0.236844	-1.68447
ALX4	-0.197207	6.83174	-3.30577	0.00233859	0.237839	-1.69133
NOLC1	0.23669	9.05235	3.30256	0.00235861	0.239103	-1.6992
LOC644234	-0.200485	7.05148	-3.29847	0.00238431	0.24093	-1.7092
UQCC	0.184283	10.0753	3.29402	0.00241262	0.243009	-1.72008
UCP1	-0.23047	7.00657	-3.29049	0.00243524	0.243543	-1.72869
TSPAN3	-0.19016	9.8294	-3.28939	0.00244234	0.243543	-1.73138
CCL4L1	0.337043	7.12879	3.28844	0.00244855	0.243543	-1.73372
UTP3	0.376537	8.85492	3.28838	0.00244891	0.243543	-1.73386
TRAK2	-0.210622	8.60141	-3.28578	0.00246585	0.244453	-1.74021
UGT2A1	0.233086	6.98623	3.28058	0.00249997	0.247057	-1.75289
ASCL2	-0.23887	7.45092	-3.27671	0.00252574	0.248821	-1.76234
RAD50	-0.210192	7.95018	-3.27129	0.00256217	0.250259	-1.77554
RNGTT	-0.231205	10.5729	-3.27119	0.00256285	0.250259	-1.77578
MTMR3	0.243086	8.5285	3.27099	0.00256423	0.250259	-1.77628
C1orf100	-0.23968	7.28988	-3.26837	0.00258202	0.250855	-1.78265
ZNF679	0.252252	7.21047	3.26774	0.0025863	0.250855	-1.78418
C10orf57	-0.213961	8.40107	-3.26594	0.00259865	0.251277	-1.78857
RGS1	0.302057	7.44611	3.26272	0.00262083	0.252645	-1.7964
MED6	0.213753	11.0801	3.26035	0.00263731	0.253101	-1.80217
ATPBD1B	0.179166	8.93296	3.25972	0.00264167	0.253101	-1.8037
ZADH2	-0.243975	7.7532	-3.25609	0.0026671	0.254761	-1.81252
PAFAH1B1	-0.189898	9.62969	-3.2487	0.00271959	0.258503	-1.83048
HPRT1	-0.205342	12.0596	-3.24783	0.00272586	0.258503	-1.8326
RBM7	0.27104	8.70743	3.24712	0.00273096	0.258503	-1.83432
LMAN2	-0.334744	8.4126	-3.24525	0.00274443	0.258998	-1.83885
ABCD3	-0.259592	8.22206	-3.24243	0.00276487	0.260147	-1.84568
PGM1	-0.191654	10.6868	-3.23727	0.00280271	0.262919	-1.8582
CTSS	-0.185944	7.7633	-3.22981	0.00285828	0.265357	-1.87627
BTBD6	-0.194871	9.50557	-3.2292	0.00286289	0.265357	-1.87775
CASP1	-0.198799	10.1847	-3.2287	0.00286662	0.265357	-1.87895
DNAJB4	0.222798	7.29892	3.22788	0.00287282	0.265357	-1.88094
LOC645249	0.181307	6.88682	3.2275	0.00287574	0.265357	-1.88188
FLJ46010	-0.20411	6.98354	-3.22702	0.00287936	0.265357	-1.88303
SFXN1	-0.250175	8.33356	-3.22474	0.00289666	0.265561	-1.88855
RRAGC	-0.253939	8.26115	-3.2245	0.00289848	0.265561	-1.88912
BCDIN3D	0.208398	9.26722	3.22261	0.00291293	0.26589	-1.8937
LYPLA1	-0.265597	10.5199	-3.22182	0.00291898	0.26589	-1.89561
MAP3K8	-0.244699	7.1584	-3.2181	0.00294766	0.267726	-1.90461
RNF114	0.194567	11.4033	3.20862	0.00302194	0.27326	-1.9275
LOC389124	-0.213019	7.10317	-3.20811	0.00302598	0.27326	-1.92873
C14orf138	0.235922	8.61039	3.1993	0.00309666	0.278841	-1.94996
ZNF548	0.20372	7.80799	3.1926	0.00315155	0.282973	-1.96611
PDS5B	-0.201664	9.26463	-3.18827	0.00318747	0.285383	-1.97653
LOC651100	-0.227733	6.94395	-3.18611	0.00320556	0.286188	-1.98173
LOC644914	-0.237477	12.5243	-3.18277	0.00323367	0.287327	-1.98975
HOXA5	0.278096	8.46526	3.18242	0.00323661	0.287327	-1.99059
TSPYL6	-0.232365	7.14767	-3.17889	0.00326665	0.289176	-1.99907
LOC647150	-0.23877	10.3511	-3.1755	0.00329567	0.290266	-2.0072
SOCS7	0.244885	7.3448	3.1753	0.00329742	0.290266	-2.00769
PHKA2	-0.231578	7.87343	-3.17235	0.00332297	0.290811	-2.01478
LOC145783	0.219058	7.36894	3.17208	0.00332528	0.290811	-2.01541
ETV5	-0.187718	8.63524	-3.16996	0.00334376	0.290811	-2.0205
EIF5B	0.20251	8.70775	3.16911	0.0033512	0.290811	-2.02255
COBL	0.205096	7.00001	3.16819	0.00335928	0.290811	-2.02476
PMM2	0.223191	9.39461	3.16765	0.00336398	0.290811	-2.02604
FCAMR	-0.203973	7.23692	-3.16715	0.0033684	0.290811	-2.02725
SURF6	0.212817	10.9266	3.1629	0.00340594	0.292964	-2.03742
ADM	0.227198	7.20683	3.16188	0.00341507	0.292964	-2.03988
KIAA0196	-0.225276	10.712	-3.16057	0.00342674	0.292964	-2.04301
UFD1L	-0.236394	7.49399	-3.16013	0.00343062	0.292964	-2.04405
FAM102A	-0.196042	7.26402	-3.15883	0.0034423	0.293164	-2.04717
TTTY6	-0.170697	7.07015	-3.15726	0.00345645	0.293574	-2.05094
LOC654121	0.286372	10.9544	3.15472	0.00347939	0.293958	-2.05701
UBE2J1	-0.212006	9.54604	-3.1539	0.00348684	0.293958	-2.05898
NMS	0.178639	6.85382	3.15366	0.00348903	0.293958	-2.05955
DMXL1	0.226855	7.01107	3.15113	0.00351207	0.295108	-2.06559
HIST1H2AM	0.19887	7.31723	3.1441	0.00357697	0.299759	-2.08239
HSPA5	-0.313337	9.6237	-3.14227	0.00359412	0.300395	-2.08678
GCC2	0.209362	7.09102	3.14038	0.00361181	0.300674	-2.09129
LOC652740	0.214505	6.88726	3.13947	0.00362034	0.300674	-2.09345
MKKS	-0.215401	10.2378	-3.13886	0.00362615	0.300674	-2.09492
LOC643037	-0.221778	6.95042	-3.13464	0.00366614	0.302775	-2.10498
PRKAR2A	-0.212961	7.49789	-3.13415	0.00367076	0.302775	-2.10614
SNORD46	0.271329	7.31662	3.1291	0.00371928	0.305314	-2.11818
ACVR1B	-0.207955	8.82081	-3.12893	0.00372097	0.305314	-2.1186
LOC100132234	0.19205	6.96316	3.1272	0.00373766	0.30577	-2.1227
LUZP1	0.207991	9.33841	3.12563	0.003753	0.30577	-2.12646
LOC642616	0.225669	6.95609	3.12527	0.00375649	0.30577	-2.12731
USP9X	-0.203502	8.54201	-3.12435	0.00376545	0.30577	-2.12949
ATP6V0E2	-0.19785	7.2667	-3.12264	0.00378219	0.306338	-2.13356
SNORA48	0.25849	7.01073	3.12127	0.00379572	0.306643	-2.13683
LOC729526	0.195494	6.91186	3.12026	0.00380566	0.306658	-2.13923
B3GNT1	-0.276072	8.27975	-3.11804	0.0038277	0.307645	-2.14452
ERGIC1	-0.284636	8.30453	-3.11686	0.00383938	0.307797	-2.14732
LEMD3	-0.215273	9.99182	-3.11511	0.0038569	0.308114	-2.15149
RPA1	-0.21651	10.8746	-3.1145	0.00386295	0.308114	-2.15292
CDC2L2	-0.269432	7.64482	-3.11343	0.00387373	0.308192	-2.15548
LOC100131530	-0.234548	7.39729	-3.1089	0.0039195	0.310613	-2.16624
TMEM8B	-0.233641	7.1387	-3.10846	0.00392392	0.310613	-2.16728
PIM3	0.228022	7.83178	3.10237	0.00398629	0.314756	-2.18172
TLX3	-0.193554	6.89069	-3.09993	0.00401155	0.315733	-2.18751
ZNF787	0.333607	10.627	3.09836	0.00402789	0.315733	-2.19123
CEP72	0.209097	7.49454	3.09748	0.00403711	0.315733	-2.19333
C17orf56	0.196659	7.26108	3.09621	0.00405036	0.315733	-2.19633
SLFN5	0.221281	7.02225	3.09619	0.00405063	0.315733	-2.19639
LOC649428	0.21074	6.92877	3.0954	0.00405894	0.315733	-2.19826
LOC646716	0.20314	6.8948	3.08862	0.00413074	0.320525	-2.21432
LOC391859	-0.201311	7.03898	-3.08714	0.00414653	0.320958	-2.21781
GOLPH3	0.244969	10.1843	3.07751	0.00425096	0.327998	-2.24058
ISG20L1	0.251067	9.82612	3.07633	0.00426392	0.327998	-2.24337
LOC654208	-0.216624	6.87737	-3.07589	0.0042688	0.327998	-2.24441
CITED2	0.209623	11.5935	3.07384	0.0042914	0.328931	-2.24924
ANKRD20A2	0.235256	6.78667	3.07225	0.00430906	0.329481	-2.253
RBM33	-0.207645	7.84645	-3.07012	0.00433279	0.330491	-2.25802
USP13	-0.20417	8.16789	-3.06672	0.00437097	0.332596	-2.26605
HERC4	-0.181047	8.74041	-3.06498	0.00439062	0.333284	-2.27015
SLC33A1	-0.230854	8.31121	-3.05916	0.00445694	0.337503	-2.28387
SMN1	0.284259	7.76084	3.05431	0.00451287	0.3405	-2.29527
PAK2	-0.19473	9.68623	-3.05385	0.00451819	0.3405	-2.29635
MRPL10	0.236839	8.99112	3.05028	0.00455993	0.342824	-2.30475
IFNAR1	-0.219352	8.26086	-3.04672	0.00460188	0.344879	-2.31312
LMO1	0.266874	6.93488	3.0461	0.00460922	0.344879	-2.31458
ROBO2	-0.188824	6.97543	-3.04327	0.00464287	0.346572	-2.32123
VN1R2	0.181582	7.19544	3.03836	0.00470179	0.349607	-2.33275
C5orf5	-0.224205	8.7308	-3.03803	0.00470578	0.349607	-2.33352
HIGD1B	-0.271249	6.78133	-3.03395	0.00475532	0.35182	-2.34309
LATS1	0.229358	6.96711	3.03338	0.0047622	0.35182	-2.34441
NDEL1	0.173297	10.0459	3.03281	0.00476916	0.35182	-2.34575
C9orf156	0.175059	8.93553	3.03141	0.00478636	0.352263	-2.34903
SAPS2	-0.256185	9.2131	-3.02889	0.00481744	0.353722	-2.35495
PEPD	-0.183595	10.2184	-3.02662	0.00484556	0.354957	-2.36026
CCDC105	0.178777	6.85592	3.02202	0.00490304	0.356422	-2.37103
TPRG1L	-0.219428	10.0876	-3.02165	0.00490768	0.356422	-2.37189
MED14	-0.18348	8.06017	-3.02137	0.00491116	0.356422	-2.37254
C3orf19	0.212338	8.91142	3.0206	0.00492081	0.356422	-2.37433
TNFRSF10B	0.254328	9.89403	3.02048	0.00492237	0.356422	-2.37462
CD300LB	-0.179935	6.93472	-3.01959	0.00493361	0.356422	-2.3767
BACH2	-0.185826	7.08859	-3.01575	0.0049824	0.35859	-2.38569
RRN3P2	0.201938	7.07625	3.01543	0.00498644	0.35859	-2.38643
SPATA2L	0.203512	8.23001	3.01168	0.00503448	0.361218	-2.39518
NDUFA9	-0.242008	10.916	-3.01075	0.00504649	0.361255	-2.39735
LOC642216	0.171961	6.96953	3.0055	0.00511479	0.365312	-2.40962
AP1G2	-0.199472	7.48823	-3.0041	0.00513303	0.365757	-2.41287
NIP7	0.229886	11.1352	3.00325	0.00514429	0.365757	-2.41487
FAM108A3	-0.183529	8.18392	-2.99871	0.00520426	0.369185	-2.42544
SNORD1A	-0.209919	7.22542	-2.99718	0.00522459	0.369793	-2.42899
TNFAIP8	-0.225571	10.2052	-2.99591	0.00524159	0.370162	-2.43196
CSNK1A1L	-0.184029	6.99731	-2.99419	0.00526463	0.370619	-2.43596
SLMO1	0.226086	7.96621	2.99367	0.00527165	0.370619	-2.43717
EIF4G3	-0.19901	9.09754	-2.99069	0.00531182	0.37261	-2.44409
SHARPIN	0.203901	8.21425	2.98935	0.00533006	0.373057	-2.44722
SNORA32	0.22744	7.06381	2.98833	0.00534399	0.373201	-2.4496
PPP1CB	-0.166418	9.84083	-2.98625	0.00537238	0.374351	-2.45443
LOC652456	0.190986	7.01916	2.98494	0.00539039	0.374775	-2.45748
SEMA4D	-0.193441	9.5607	-2.98335	0.00541218	0.375459	-2.46116
AKIRIN2	0.197034	10.3218	2.98138	0.00543952	0.376525	-2.46575
C13orf7	0.346589	8.06088	2.97839	0.00548099	0.378562	-2.47267
UPF3B	0.192873	9.6298	2.97659	0.0055062	0.379355	-2.47685
MTF1	0.227872	7.8948	2.97314	0.00555485	0.379355	-2.48487
CLDN12	-0.191143	8.75511	-2.9722	0.00556808	0.379355	-2.48703
HEPH	0.185533	6.93172	2.97206	0.00557007	0.379355	-2.48736
MEP1A	-0.160335	6.8521	-2.97201	0.00557073	0.379355	-2.48747
FLJ42220	0.198324	6.95108	2.97173	0.00557481	0.379355	-2.48813
RAB25	0.195547	6.87951	2.97121	0.00558216	0.379355	-2.48934
SFRS1	-0.218354	12.8262	-2.97072	0.00558904	0.379355	-2.49046
LOC644619	-0.247667	7.92793	-2.96823	0.00562467	0.380669	-2.49625
UBAP1	0.237889	9.01482	2.96674	0.00564597	0.380669	-2.49969
FBXO33	-0.20541	9.36504	-2.96635	0.00565161	0.380669	-2.5006
LOC100134201	-0.191399	6.98091	-2.96526	0.00566718	0.380669	-2.5031
RPAP2	0.19629	8.04297	2.96514	0.00566897	0.380669	-2.50339
TIGA1	0.205777	11.3056	2.96396	0.00568595	0.380995	-2.50612
UBL3	-0.204069	9.34779	-2.96195	0.00571506	0.381805	-2.51077
POTEH	0.206937	6.91378	2.96117	0.00572652	0.381805	-2.51259
ALDH3A2	-0.208927	9.45422	-2.96048	0.00573643	0.381805	-2.51416
PEX10	-0.21825	7.07184	-2.95978	0.00574664	0.381805	-2.51578
LOC729153	0.153702	7.01333	2.95859	0.00576417	0.382162	-2.51856
PPP1R12B	-0.287415	8.19855	-2.95704	0.00578679	0.382854	-2.52212
LOC653610	0.26378	7.10073	2.95596	0.00580268	0.383099	-2.52462
LOC442606	-0.195529	6.963	-2.95424	0.00582809	0.383357	-2.5286
LOC401317	0.2344	6.95288	2.95318	0.00584383	0.383357	-2.53105
HES4	0.183577	7.05773	2.95279	0.00584966	0.383357	-2.53196
SNORD3C	0.340349	7.60141	2.9524	0.00585539	0.383357	-2.53285
AKAP7	-0.219536	7.03795	-2.95042	0.00588492	0.384489	-2.53743
THOC4	-0.291954	11.4265	-2.94722	0.00593276	0.386403	-2.5448
UBC	0.2399	14.5066	2.94676	0.00593973	0.386403	-2.54587
CA2	0.248197	13.5117	2.94601	0.0059511	0.386403	-2.54761
ISM1	0.232927	7.12707	2.94505	0.00596549	0.386539	-2.5498
ZC3H4	0.212306	10.2285	2.94327	0.00599256	0.387494	-2.55392
TRA2A	-0.248833	8.72101	-2.94242	0.00600539	0.387526	-2.55587
ANXA7	-0.192219	10.9355	-2.93922	0.00605438	0.389887	-2.56326
ZNF280C	0.17413	8.19548	2.93548	0.00611199	0.391751	-2.57187
FOSL2	0.219867	7.47734	2.93537	0.0061136	0.391751	-2.57211
LOC649856	0.218594	7.53621	2.93462	0.0061253	0.391751	-2.57385
LOC647910	-0.220277	7.07154	-2.9337	0.00613944	0.391751	-2.57595
DRAM1	-0.207895	8.27375	-2.93331	0.00614565	0.391751	-2.57687
NAMPT	0.248673	8.21412	2.93162	0.00617184	0.392624	-2.58074
HESX1	-0.238694	7.46185	-2.93046	0.00619012	0.3927	-2.58343
CCK	-0.178106	6.93398	-2.92926	0.00620892	0.3927	-2.58618
BTG1	0.316624	11.6117	2.92915	0.00621053	0.3927	-2.58642
LOC728635	-0.231315	9.11069	-2.92636	0.00625452	0.394688	-2.59284
LASS5	-0.238915	7.97158	-2.9234	0.00630148	0.396337	-2.59964
CXorf12	-0.172147	7.41941	-2.92313	0.00630588	0.396337	-2.60027
PAM	-0.226355	8.64435	-2.92077	0.0063435	0.397224	-2.60568
TTC39C	-0.192049	8.0562	-2.92066	0.00634527	0.397224	-2.60593
ZBTB5	0.19935	7.76623	2.91497	0.00643704	0.402168	-2.61898
KIAA1715	-0.232376	7.74776	-2.91169	0.00649057	0.403912	-2.6265
LOC652570	-0.187951	6.88945	-2.91169	0.00649066	0.403912	-2.62652
FAM86D	0.253276	7.96642	2.91009	0.00651676	0.404502	-2.63016
EAF1	0.254709	8.50905	2.90953	0.00652603	0.404502	-2.63145
MAML1	0.205086	7.23214	2.90876	0.00653875	0.404502	-2.63322
LOC442711	-0.174604	6.96169	-2.90701	0.00656761	0.405305	-2.63722
LOC649305	0.230673	7.08249	2.90641	0.00657753	0.405305	-2.63859
LOC647805	0.201892	7.08712	2.90525	0.00659679	0.405696	-2.64125
FBXO30	0.234119	8.72759	2.90403	0.0066172	0.406157	-2.64405
PIGN	-0.192721	8.98949	-2.90133	0.00666227	0.408126	-2.65022
URB1	-0.198648	7.28124	-2.89875	0.00670577	0.409649	-2.65613
C2orf68	-0.18476	7.60566	-2.89831	0.0067132	0.409649	-2.65713
DGKH	-0.185191	7.07123	-2.89422	0.00678253	0.413077	-2.66646
ERCC-00003	-0.181548	6.84421	-2.89259	0.00681044	0.413119	-2.67019
GPHN	-0.200115	8.65967	-2.89168	0.006826	0.413119	-2.67226
TCAM1	-0.199193	7.62276	-2.89156	0.00682814	0.413119	-2.67254
LOC440992	-0.175376	6.86497	-2.89111	0.00683579	0.413119	-2.67356
SFRS12	0.207052	8.501	2.88532	0.00693614	0.418379	-2.68679
ZNF324B	0.202445	7.63072	2.88372	0.00696397	0.418438	-2.69042
LOC100132249	-0.203449	6.95512	-2.88316	0.00697373	0.418438	-2.69169
LOC644544	0.178886	7.38177	2.88297	0.00697707	0.418438	-2.69212
OR7A10	0.206877	6.91613	2.881	0.00701174	0.419511	-2.69662
TLE1	-0.193934	7.89333	-2.88044	0.00702166	0.419511	-2.6979
REEP5	-0.199902	9.92435	-2.87924	0.0070427	0.41976	-2.70062
ZNF34	0.214133	7.89298	2.87869	0.00705254	0.41976	-2.70188
PPP1R10	0.252875	8.61087	2.87561	0.00710724	0.422216	-2.70889
HUS1	-0.173676	7.06732	-2.8739	0.00713785	0.422217	-2.71279
SIRT1	0.205759	8.19322	2.87254	0.00716221	0.422217	-2.71588
HIATL1	-0.203225	9.11618	-2.87239	0.00716494	0.422217	-2.71622
CPEB2	0.190253	7.9114	2.87193	0.00717311	0.422217	-2.71726
SERINC3	-0.212403	9.47638	-2.87169	0.00717741	0.422217	-2.7178
TSC22D4	0.229836	7.47367	2.87091	0.00719143	0.422217	-2.71957
C1QTNF7	0.228181	6.93622	2.87037	0.0072013	0.422217	-2.72081
NOXA1	-0.179617	6.99198	-2.86743	0.00725452	0.424545	-2.72749
TLR4	-0.243176	7.56297	-2.86467	0.00730478	0.426691	-2.73375
CABLES2	-0.153356	7.08518	-2.86379	0.00732087	0.426838	-2.73574
FDX1L	0.217644	8.70635	2.86271	0.00734074	0.427204	-2.7382
GOLGA2LY1	-0.190972	6.84288	-2.8611	0.0073704	0.428137	-2.74185
ANXA11	-0.205836	8.43882	-2.85969	0.00739656	0.428723	-2.74506
SKIL	0.173884	7.07371	2.859	0.00740924	0.428723	-2.74662
NUDCD2	0.199893	9.32999	2.85747	0.00743763	0.428723	-2.75008
MTM1	-0.231321	8.62653	-2.85714	0.00744388	0.428723	-2.75084
SNORD2	0.182768	6.87586	2.85637	0.00745822	0.428723	-2.75259
SNORD84	0.229374	7.46387	2.85615	0.00746234	0.428723	-2.75309
RASSF7	0.163555	9.66622	2.85135	0.00755231	0.432422	-2.76394
KRI1	0.178213	7.41933	2.85125	0.00755425	0.432422	-2.76418
LOC729558	-0.219925	7.13836	-2.8492	0.00759304	0.433567	-2.76882
GFI1	0.166986	10.7003	2.84867	0.00760308	0.433567	-2.77001
GMCL1	-0.229358	8.6511	-2.84763	0.00762282	0.433567	-2.77236
LOC645146	0.191161	6.83437	2.84697	0.00763548	0.433567	-2.77386
LOC388494	-0.175836	6.90335	-2.84596	0.00765477	0.433567	-2.77615
OR13J1	-0.169794	6.78417	-2.8457	0.0076597	0.433567	-2.77673
dJ222E13.2	0.189993	7.34823	2.84388	0.00769465	0.433567	-2.78085
LOC642312	0.192639	7.01436	2.84362	0.00769966	0.433567	-2.78144
G3BP2	-0.162113	11.0492	-2.84313	0.007709	0.433567	-2.78254
CDC23	0.173066	10.2177	2.84262	0.0077189	0.433567	-2.7837
LOC641978	0.229925	7.28757	2.84225	0.007726	0.433567	-2.78454
LOC645682	0.183595	6.81446	2.83761	0.00781603	0.436751	-2.79502
LOC641367	-0.171908	7.24871	-2.83741	0.00781985	0.436751	-2.79547
LOC100130707	-0.191639	10.8722	-2.83718	0.00782443	0.436751	-2.796
GFOD1	0.225717	8.96886	2.83589	0.00784963	0.437214	-2.79891
GMEB2	0.182974	8.94977	2.83533	0.00786056	0.437214	-2.80017
TAF7	0.229575	8.95922	2.83366	0.00789329	0.438259	-2.80393
HIST1H4B	0.24629	7.15796	2.83244	0.00791746	0.438534	-2.80669
UBE1	-0.239113	9.32821	-2.83156	0.00793468	0.438534	-2.80866
SLC35E2	-0.233666	6.94297	-2.83129	0.00794011	0.438534	-2.80928
SORD	0.272688	8.38049	2.8287	0.0079914	0.439156	-2.8151
SLC7A2	-0.234589	9.10186	-2.82838	0.00799783	0.439156	-2.81583
MIR1912	-0.1857	6.87834	-2.82783	0.00800877	0.439156	-2.81707
KIAA0406	-0.226914	7.63027	-2.82754	0.00801464	0.439156	-2.81773
LOC650737	-0.18908	8.82736	-2.82656	0.00803414	0.439156	-2.81993
TUFT1	0.153301	7.0915	2.82585	0.00804847	0.439156	-2.82154
AFAP1L1	0.209556	7.02555	2.82517	0.00806205	0.439156	-2.82307
ZNF317	0.217599	9.26547	2.82491	0.00806736	0.439156	-2.82366
LOC652082	-0.175893	7.13266	-2.82425	0.00808045	0.439156	-2.82513
WHAMM	0.205218	7.56276	2.82372	0.00809111	0.439156	-2.82632
FRMPD2L2	-0.173763	6.96272	-2.82288	0.00810805	0.439316	-2.82821
OR5B3	-0.195207	6.93065	-2.81542	0.00826002	0.445605	-2.84501
LRRC28	-0.204899	8.19965	-2.81534	0.00826169	0.445605	-2.84519
CCNE2	-0.21996	10.4628	-2.81479	0.00827286	0.445605	-2.84641
ATP6AP2	-0.166119	12.1216	-2.81432	0.00828253	0.445605	-2.84747
ZBTB11	0.24137	7.36232	2.8132	0.0083056	0.445605	-2.84998
LOC139542	0.200327	6.91326	2.81245	0.00832123	0.445605	-2.85168
MED30	-0.164413	11.396	-2.81185	0.00833363	0.445605	-2.85303
CTTN	-0.205245	7.55387	-2.81166	0.00833754	0.445605	-2.85345
VLDLR	-0.185168	7.7589	-2.81093	0.00835272	0.445658	-2.8551
ZNF492	-0.174301	7.66002	-2.80873	0.00839847	0.447339	-2.86003
ZNF613	0.205053	8.01353	2.80709	0.00843275	0.448406	-2.86372
LOC100130469	-0.213289	7.0496	-2.80413	0.00849483	0.450497	-2.87034
FUT8	-0.209681	7.41805	-2.80385	0.00850076	0.450497	-2.87097
GRK4	0.196425	7.07063	2.80304	0.00851786	0.450644	-2.87279
PNO1	0.242331	8.94901	2.80187	0.00854259	0.450871	-2.87541
HAPLN3	0.16911	6.73675	2.80129	0.00855493	0.450871	-2.87671
MOSPD2	-0.167045	7.65404	-2.8008	0.00856521	0.450871	-2.8778
MT4	-0.197479	6.93602	-2.80002	0.00858196	0.450928	-2.87956
MMD	-0.205858	8.72258	-2.79838	0.00861694	0.450928	-2.88324
RNF166	0.165892	7.53104	2.79805	0.00862378	0.450928	-2.88396
LOC642675	0.193485	6.94155	2.79709	0.00864442	0.450928	-2.88611
TACC1	-0.184364	11.4957	-2.79682	0.00865028	0.450928	-2.88673
FLJ27465	0.166151	7.06075	2.79584	0.00867119	0.450928	-2.88891
LOC644012	0.210756	7.01646	2.79565	0.00867543	0.450928	-2.88935
ZNF586	0.219335	8.22413	2.79467	0.00869646	0.450928	-2.89154
CYB5A	-0.183484	9.01132	-2.79369	0.00871747	0.450928	-2.89372
LOC100129958	-0.2389	7.73319	-2.79303	0.00873175	0.450928	-2.89519
PRAGMIN	-0.203177	10.8649	-2.793	0.00873241	0.450928	-2.89526
TANC2	-0.168282	6.91041	-2.79272	0.00873847	0.450928	-2.89589
LOC651059	-0.201309	6.85137	-2.79129	0.00876951	0.451788	-2.89909
CCDC26	0.211994	9.77635	2.78958	0.00880681	0.452967	-2.90292
HIST1H3E	0.220878	7.40439	2.78817	0.00883761	0.453808	-2.90607
LOC646869	0.218199	7.12017	2.78611	0.00888266	0.454865	-2.91067
SPATA5L1	0.237516	9.12757	2.78591	0.00888713	0.454865	-2.91112
C12orf56	-0.199453	6.93678	-2.78508	0.00890529	0.455053	-2.91296
TEX12	-0.201452	6.95687	-2.78319	0.0089471	0.456225	-2.91719
UBE4B	-0.210104	8.85902	-2.78273	0.00895725	0.456225	-2.91821
SNORD41	-0.185756	6.92527	-2.78042	0.00900852	0.457094	-2.92337
C12orf35	0.350896	9.73751	2.78009	0.00901583	0.457094	-2.9241
SDHA	-0.176631	10.2077	-2.78	0.00901796	0.457094	-2.92431
GPR110	0.188143	7.08017	2.77715	0.0090817	0.459584	-2.93067
LOC729700	0.162998	6.83734	2.77606	0.00910615	0.46008	-2.93309
LOC100129907	-0.202917	7.80779	-2.77495	0.00913106	0.460598	-2.93556
FLJ35429	0.181309	7.05052	2.77262	0.00918371	0.462512	-2.94074
BTG3	0.203877	9.32409	2.7703	0.00923651	0.464427	-2.94592
RTN3	-0.172542	10.0555	-2.76928	0.0092598	0.464603	-2.94819
TMEM41B	-0.182162	9.35202	-2.76885	0.00926959	0.464603	-2.94914
HKR1	-0.179377	7.08991	-2.767	0.00931196	0.465984	-2.95325
GLI2	0.152483	6.80075	2.76336	0.00939604	0.469444	-2.96136
LOC728924	0.202178	6.97726	2.76248	0.00941644	0.469716	-2.96331
SS18	0.292933	8.92896	2.76176	0.00943304	0.469798	-2.9649
LOC641810	-0.188268	6.86814	-2.76063	0.00945937	0.470364	-2.96742
UTP23	0.265505	9.77647	2.75962	0.00948305	0.470797	-2.96967
DGUOK	-0.155727	11.5745	-2.75715	0.00954081	0.471174	-2.97514
TOLLIP	-0.172708	7.4995	-2.75632	0.00956045	0.471174	-2.977
CHD1	0.219761	9.02731	2.75598	0.00956826	0.471174	-2.97773
RG9MTD1	0.29387	9.27038	2.75582	0.00957221	0.471174	-2.9781
LOC642775	0.205358	6.97213	2.75558	0.00957787	0.471174	-2.97864
FAM12B	-0.169891	6.85698	-2.75546	0.0095806	0.471174	-2.97889
FOXP3	0.203639	7.04032	2.75393	0.00961668	0.4716	-2.98228
MIR550-2	-0.173534	7.0171	-2.75382	0.00961929	0.4716	-2.98253
TBC1D20	-0.168731	7.81479	-2.75142	0.00967643	0.472096	-2.98786
KLF2	0.233938	8.63675	2.75109	0.0096841	0.472096	-2.98858
TTYH1	-0.1648	6.95925	-2.75085	0.00968985	0.472096	-2.98911
STAM	-0.185844	8.14261	-2.75033	0.00970226	0.472096	-2.99026
CTPS2	-0.189558	8.29769	-2.75021	0.00970531	0.472096	-2.99055
P2RY2	0.218547	10.3297	2.74955	0.00972101	0.472096	-2.992
C22orf39	0.189192	7.79014	2.74878	0.00973931	0.472096	-2.9937
NTM	0.183636	7.04624	2.74836	0.00974958	0.472096	-2.99465
C10orf140	-0.225456	9.12412	-2.74693	0.00978386	0.473027	-2.99781
OAZ2	-0.278949	8.37006	-2.74584	0.00980998	0.47316	-3.00021
ISCA2	-0.174236	8.06619	-2.7452	0.00982558	0.47316	-3.00164
ATP6V1A	-0.167707	11.2581	-2.74466	0.00983865	0.47316	-3.00284
NOC3L	0.234234	9.84198	2.74377	0.00985996	0.47316	-3.00479
NUAK1	0.190465	7.29815	2.74328	0.00987207	0.47316	-3.00589
ZNF215	0.144532	7.94266	2.74282	0.0098831	0.47316	-3.0069
LOC644574	-0.154368	6.91092	-2.74245	0.00989201	0.47316	-3.00771
ABCC5	-0.223552	7.80032	-2.74047	0.00994034	0.47475	-3.0121
LOC100132994	-0.214356	7.02547	-2.73799	0.010001	0.476804	-3.01758
ATP8A2	-0.191456	6.97217	-2.73698	0.0100258	0.476804	-3.01981
LOC651923	-0.169843	6.89395	-2.73686	0.0100289	0.476804	-3.02009
SH2D3C	-0.19117	7.15545	-2.73568	0.0100578	0.477388	-3.02268
EEFSEC	-0.167893	7.01976	-2.73513	0.0100715	0.477388	-3.02391
WDR74	0.241185	10.0779	2.73422	0.0100939	0.477726	-3.0259
PPIL5	0.284177	10.6452	2.73354	0.0101109	0.477813	-3.02742
C21orf67	-0.170991	6.9695	-2.73198	0.0101495	0.478918	-3.03085
C19orf2	-0.139595	12.0058	-2.73073	0.0101808	0.479673	-3.03362
RRAGD	-0.19251	9.71149	-2.72844	0.010238	0.481033	-3.03866
COPG2IT1	-0.177886	7.029	-2.72798	0.0102497	0.481033	-3.03969
LOC646067	-0.153542	7.17261	-2.72758	0.0102596	0.481033	-3.04056
NFIB	0.209678	6.97945	2.72713	0.0102709	0.481033	-3.04155
CRYZ	-0.205979	9.54751	-2.72529	0.0103174	0.482494	-3.04562
SULT1E1	-0.194646	6.9638	-2.72156	0.010412	0.486191	-3.05382
PEX7	-0.205856	8.97628	-2.7185	0.0104902	0.489117	-3.06055
TMEM14D	-0.190457	11.8043	-2.71756	0.0105146	0.489527	-3.06264
LOC647054	0.159331	6.89789	2.7145	0.0105935	0.491157	-3.06937
LOC651401	-0.211676	6.97032	-2.71446	0.0105944	0.491157	-3.06944
DICER1	-0.173086	8.10775	-2.71383	0.0106109	0.491157	-3.07084
PECR	-0.198413	7.70814	-2.71292	0.0106344	0.491157	-3.07283
TBC1D10A	0.191628	7.15597	2.71233	0.0106498	0.491157	-3.07413
ZNF554	-0.216218	6.8599	-2.71231	0.0106504	0.491157	-3.07418
JMJD4	0.178755	7.93154	2.71198	0.010659	0.491157	-3.07491
RAB9B	-0.196318	6.90276	-2.71076	0.0106906	0.491893	-3.07757
FAM59B	-0.201786	7.08242	-2.70962	0.0107204	0.491955	-3.08008
B3GNT6	-0.230418	7.34611	-2.70952	0.0107233	0.491955	-3.08031
LOC440093	0.178655	11.7347	2.70856	0.0107482	0.492381	-3.0824
XKR5	0.195499	6.94507	2.70649	0.0108028	0.4936	-3.08695
GRPEL2	0.209606	9.18631	2.70578	0.0108215	0.4936	-3.08851
CARD17	-0.158401	7.00968	-2.70555	0.0108275	0.4936	-3.08901
HNRPUL2	-0.197808	9.68769	-2.70517	0.0108376	0.4936	-3.08985
ERCC-00054	-0.179094	6.77947	-2.70346	0.0108829	0.494944	-3.09359
INTS10	-0.226335	11.0773	-2.70279	0.0109007	0.495037	-3.09506
MIR7-3	-0.178422	6.87335	-2.70203	0.010921	0.495244	-3.09674
MAPK6	-0.201372	10.2149	-2.7002	0.0109698	0.496219	-3.10074
LOC732425	0.167092	7.19496	2.69965	0.0109846	0.496219	-3.10195
WDR33	0.225411	9.86735	2.69945	0.0109899	0.496219	-3.10239
FAM173B	-0.218946	8.71343	-2.69841	0.011018	0.496774	-3.10468
ASB7	0.171665	7.44959	2.69578	0.0110889	0.498788	-3.11044
SLTM	-0.178318	9.16073	-2.69557	0.0110944	0.498788	-3.11089
PLSCR2	-0.209237	6.83024	-2.69342	0.0111527	0.500692	-3.11559
SCARNA2	0.195722	6.92848	2.69241	0.0111802	0.50121	-3.1178
ENTPD7	-0.198178	7.36498	-2.69029	0.0112381	0.503091	-3.12245
ZC3H7B	0.179278	6.93108	2.686	0.011356	0.506705	-3.13181
METTL2B	0.174079	7.09125	2.68564	0.011366	0.506705	-3.13261
LOC650406	-0.167724	7.03157	-2.68559	0.0113672	0.506705	-3.1327
WDR27	0.175447	7.44322	2.68405	0.0114101	0.507897	-3.13608
LOC645307	0.164928	7.00184	2.68286	0.011443	0.508344	-3.13866
LOC652887	0.178244	7.01557	2.68221	0.0114612	0.508344	-3.14009
LAX1	-0.208781	6.99073	-2.68194	0.0114687	0.508344	-3.14068
CNPY2	-0.180934	11.6569	-2.68132	0.0114861	0.508396	-3.14204
ERLIN2	-0.168576	10.0381	-2.67928	0.0115433	0.509891	-3.14649
RNF180	-0.219812	6.95202	-2.67895	0.0115523	0.509891	-3.1472
FOXF2	-0.199642	6.85638	-2.67698	0.0116079	0.510705	-3.1515
ATP6V0D1	-0.244038	9.48835	-2.67633	0.0116262	0.510705	-3.15292
PBK	-0.216306	10.2836	-2.67625	0.0116283	0.510705	-3.15308
ATG5	-0.193616	8.03493	-2.67518	0.0116586	0.510705	-3.15542
CCDC16	0.207317	9.75446	2.67388	0.0116956	0.510705	-3.15826
SCARNA13	-0.196396	7.66455	-2.67383	0.011697	0.510705	-3.15837
CREG2	0.180053	6.80839	2.67361	0.0117032	0.510705	-3.15884
LOC645585	0.184472	6.94828	2.67337	0.01171	0.510705	-3.15936
LOC644379	-0.206228	6.84528	-2.67313	0.011717	0.510705	-3.1599
PPP1R14C	-0.199778	7.95036	-2.67094	0.0117793	0.512682	-3.16466
LOC100133478	-0.207418	7.85655	-2.66992	0.0118085	0.512682	-3.16688
PEX14	0.189582	7.76357	2.6689	0.0118378	0.512682	-3.16909
ZNF844	-0.171204	6.92067	-2.6688	0.0118405	0.512682	-3.1693
MYCBPAP	0.164985	6.81622	2.66866	0.0118446	0.512682	-3.16961
LOC339760	0.168707	7.07089	2.6676	0.011875	0.512682	-3.17191
LOC339746	0.183162	6.92749	2.66755	0.0118766	0.512682	-3.17203
RELB	0.176539	7.02284	2.66632	0.0119122	0.513515	-3.17471
ZIK1	0.192609	6.96456	2.66549	0.0119362	0.513845	-3.17652
HIGD1C	0.171452	6.92101	2.66386	0.0119833	0.515168	-3.18005
LOC650321	0.310893	7.47652	2.66223	0.0120307	0.515565	-3.18359
LOC653972	0.200267	8.99706	2.66219	0.012032	0.515565	-3.18369
GUSBL1	-0.196614	9.30004	-2.66185	0.0120418	0.515565	-3.18441
DERL1	-0.161098	10.5701	-2.66107	0.0120646	0.51584	-3.18611
LOC100128023	-0.204545	7.60934	-2.66037	0.012085	0.516009	-3.18762
HIST1H4J	0.209242	7.2969	2.65931	0.0121161	0.516384	-3.18993
GBE1	-0.166136	10.4032	-2.65895	0.0121266	0.516384	-3.19071
FUBP3	-0.202855	10.2068	-2.65743	0.0121715	0.517174	-3.19402
ZNF812	0.168705	6.88382	2.65707	0.0121821	0.517174	-3.1948
CSTF3	-0.189376	10.7317	-2.65629	0.012205	0.517174	-3.19648
SEPHS1	-0.158391	10.2455	-2.65609	0.012211	0.517174	-3.19692
LOC652833	0.214982	7.0378	2.65534	0.0122333	0.517226	-3.19855
LOC644732	-0.159841	6.89609	-2.65438	0.0122616	0.517226	-3.20062
IFNK	-0.192223	6.8834	-2.65407	0.0122708	0.517226	-3.2013
TTC7A	-0.195732	7.60861	-2.65362	0.0122841	0.517226	-3.20227
FAM21B	0.192594	7.19587	2.65282	0.012308	0.517226	-3.20401
ACAT1	-0.164765	11.8348	-2.6519	0.0123353	0.517226	-3.206
CADM1	-0.258563	9.60588	-2.65163	0.0123434	0.517226	-3.20658
ATP6V0A1	-0.219056	9.77785	-2.65162	0.0123439	0.517226	-3.20662
RUNDC3A	-0.172454	6.76715	-2.65073	0.0123702	0.517639	-3.20853
LOC653569	-0.15494	6.92903	-2.64975	0.0123996	0.517963	-3.21065
TJAP1	0.208298	9.96212	2.64938	0.0124109	0.517963	-3.21147
PPM1D	0.163991	8.98839	2.64714	0.0124781	0.518593	-3.2163
TGFBRAP1	-0.273989	7.84357	-2.64707	0.0124802	0.518593	-3.21645
LOC730417	-0.207937	8.3515	-2.64665	0.0124929	0.518593	-3.21737
LOC652698	-0.188527	7.18922	-2.64643	0.0124996	0.518593	-3.21785
C6orf118	0.16954	6.90472	2.64556	0.0125261	0.518593	-3.21974
TBCC	0.166641	8.88581	2.64541	0.0125304	0.518593	-3.22005
UTX	0.193878	7.68	2.64504	0.0125415	0.518593	-3.22085
WFDC11	0.170429	6.98308	2.64235	0.0126235	0.519476	-3.22668
ADAT1	-0.201918	8.07844	-2.64091	0.0126675	0.519476	-3.22979
NLE1	0.189587	7.54682	2.64071	0.0126735	0.519476	-3.23021
LOC285943	-0.17527	7.20539	-2.6399	0.0126982	0.519476	-3.23196
C10orf96	0.23603	6.87298	2.63919	0.0127199	0.519476	-3.23349
UPF1	0.177457	8.50101	2.63906	0.012724	0.519476	-3.23378
LOC400553	-0.179941	6.92869	-2.63892	0.0127285	0.519476	-3.2341
IVL	-0.198354	6.9621	-2.63801	0.0127563	0.519476	-3.23605
GPR18	-0.263695	8.48389	-2.63784	0.0127615	0.519476	-3.23641
SPRR4	-0.175135	6.99232	-2.63741	0.0127747	0.519476	-3.23734
NXF4	-0.280485	7.12269	-2.63696	0.0127888	0.519476	-3.23833
OKL38	0.418609	8.90987	2.63665	0.0127981	0.519476	-3.23898
PITPNA	-0.196029	7.74309	-2.63647	0.0128039	0.519476	-3.23938
GTF3C3	-0.185119	9.69732	-2.63606	0.0128166	0.519476	-3.24027
CYP2E1	-0.228202	7.07678	-2.63523	0.0128422	0.519476	-3.24206
RRP8	0.183544	9.84783	2.635	0.0128492	0.519476	-3.24254
LOC100133825	0.207898	7.00174	2.63492	0.0128519	0.519476	-3.24273
LOC100132086	0.296619	7.92146	2.63464	0.0128605	0.519476	-3.24333
TADA2A	0.226958	7.61206	2.63371	0.0128893	0.519973	-3.24533
LOC652735	0.176356	6.94631	2.63264	0.0129227	0.520652	-3.24765
ZNF644	0.241573	8.4859	2.63103	0.0129728	0.521078	-3.25111
IL18R1	0.161299	6.90259	2.63077	0.0129811	0.521078	-3.25168
C1orf31	0.206594	8.61941	2.63071	0.012983	0.521078	-3.25181
TOP	-0.211075	7.21746	-2.62812	0.0130642	0.523668	-3.25739
ATP2A2	-0.187139	9.46528	-2.6272	0.013093	0.524154	-3.25936
ZNF383	0.211038	7.7544	2.62443	0.0131807	0.526645	-3.26533
LOC651581	0.282163	6.99784	2.62335	0.0132151	0.526645	-3.26766
LOC654194	0.222728	14.2456	2.62334	0.0132155	0.526645	-3.26769
CEBPB	0.201559	10.1613	2.62312	0.0132223	0.526645	-3.26815
ANAPC10	0.171438	9.61401	2.62078	0.013297	0.528952	-3.27319
MDH1	-0.167248	12.9827	-2.61924	0.0133464	0.529836	-3.2765
CES2	-0.216178	9.74078	-2.61903	0.013353	0.529836	-3.27694
LOC100131810	0.278821	7.71469	2.61787	0.0133904	0.530412	-3.27944
C9orf45	-0.193828	7.49885	-2.61746	0.0134037	0.530412	-3.28033
NDUFV3	0.142331	8.30321	2.61701	0.0134181	0.530412	-3.28129
MRLC2	-0.134134	12.3271	-2.61609	0.013448	0.530924	-3.28328
NSUN4	0.192882	9.71384	2.61481	0.0134894	0.531604	-3.28603
KIF13A	-0.152516	6.90934	-2.61427	0.0135068	0.531604	-3.28718
AP1S1	-0.175425	9.52519	-2.61369	0.0135256	0.531604	-3.28842
SNORD97	0.166482	6.95247	2.61347	0.0135328	0.531604	-3.2889
LOC642712	0.27533	7.07027	2.61243	0.0135665	0.531906	-3.29112
KRTAP4-11	0.162098	6.90128	2.61208	0.0135779	0.531906	-3.29187
C2orf44	0.171216	9.33138	2.61138	0.0136009	0.531906	-3.29339
RAB11FIP4	0.150877	6.74262	2.61069	0.0136232	0.531906	-3.29485
FLJ39739	0.204784	7.158	2.6105	0.0136298	0.531906	-3.29528
KIAA1267	0.178866	9.57489	2.60963	0.0136581	0.531906	-3.29713
SNHG4	-0.184142	7.58218	-2.60935	0.0136672	0.531906	-3.29773
KIF1C	0.175951	7.0148	2.60871	0.0136882	0.531906	-3.2991
ARHGAP21	-0.197451	8.24718	-2.60857	0.0136929	0.531906	-3.29941
DCT	-0.145238	6.77948	-2.60684	0.0137498	0.533458	-3.30311
ZNF846	-0.198658	6.95247	-2.60586	0.0137822	0.534057	-3.30522
KIAA0020	0.210055	10.531	2.60453	0.0138262	0.53479	-3.30806
ST13	-0.213994	9.99344	-2.60426	0.0138352	0.53479	-3.30864
ASXL2	-0.216522	8.61299	-2.60287	0.0138814	0.535918	-3.31162
HNRNPC	-0.195518	10.3277	-2.602	0.0139104	0.536378	-3.31349
LOC642198	0.204492	7.01708	2.60063	0.0139562	0.537483	-3.31642
ODF3L1	-0.149954	6.85421	-2.59948	0.0139948	0.538313	-3.31889
LOC643002	0.174075	6.88507	2.597	0.0140781	0.540853	-3.32419
PLP2	-0.18379	8.67942	-2.5955	0.0141288	0.541763	-3.3274
BEYLA	0.165102	6.9852	2.59528	0.0141362	0.541763	-3.32787
GHR	-0.15204	6.73167	-2.59236	0.0142352	0.544479	-3.33409
MYCBP	-0.199293	7.66916	-2.59217	0.0142418	0.544479	-3.3345
SPTLC2	-0.180347	7.13322	-2.59099	0.0142822	0.54536	-3.33703
TRAPPC2P1	0.191942	8.51964	2.59007	0.0143135	0.545893	-3.33899
MED27	0.168992	9.01523	2.58908	0.0143475	0.546344	-3.3411
GPR12	-0.174721	6.74061	-2.58871	0.0143601	0.546344	-3.34189
LOC652712	-0.175302	6.95887	-2.58689	0.0144227	0.546434	-3.34577
CDC42EP3	0.186088	7.82343	2.58595	0.0144553	0.546434	-3.34778
POLR3K	0.17673	10.135	2.58588	0.0144578	0.546434	-3.34794
TAF1D	0.291585	8.00254	2.58539	0.0144746	0.546434	-3.34897
LOC653657	-0.153827	6.89051	-2.58476	0.0144965	0.546434	-3.35032
C2orf49	0.177631	9.0435	2.58452	0.0145047	0.546434	-3.35083
OR1Q1	0.151116	6.87503	2.5844	0.014509	0.546434	-3.35109
LOC100132314	0.164308	6.90241	2.58434	0.0145109	0.546434	-3.35121
LOC284688	-0.150215	7.01583	-2.58313	0.0145529	0.546434	-3.35379
MCM2	-0.214109	9.87836	-2.58219	0.0145858	0.546434	-3.3558
NARG1L	0.195747	8.22551	2.58206	0.0145902	0.546434	-3.35607
LOC100128888	0.165403	7.09735	2.58167	0.0146037	0.546434	-3.35689
TOE1	0.19321	7.84515	2.58167	0.0146038	0.546434	-3.3569
ANKRD55	-0.213957	6.91184	-2.58143	0.0146122	0.546434	-3.35741
SLC9A10	-0.214347	6.95351	-2.57845	0.0147164	0.546434	-3.36375
OSBPL1A	-0.212621	8.77193	-2.57785	0.0147376	0.546434	-3.36503
MRPL50	0.187669	10.9173	2.57775	0.0147411	0.546434	-3.36524
LCOR	0.19428	7.5403	2.57731	0.0147567	0.546434	-3.36619
YWHAQ	-0.147833	12.9677	-2.57699	0.0147679	0.546434	-3.36686
FABP5L7	0.172527	6.87874	2.57661	0.0147815	0.546434	-3.36768
LOC641959	0.213314	7.0135	2.57657	0.0147828	0.546434	-3.36776
LOC653934	-0.16739	7.01564	-2.57655	0.0147834	0.546434	-3.3678
LOC728656	-0.203209	6.91868	-2.57561	0.0148168	0.546434	-3.36981
TTC37	-0.215233	9.26135	-2.57556	0.0148184	0.546434	-3.36991
RMND5B	0.192109	7.5841	2.57526	0.014829	0.546434	-3.37054
DNCL1	0.210712	13.5595	2.57522	0.0148303	0.546434	-3.37062
SLC5A10	-0.171134	7.22926	-2.57518	0.0148319	0.546434	-3.37072
RNU5A	0.183442	6.94477	2.57351	0.0148909	0.547966	-3.37426
FAM60A	0.254396	9.89986	2.57284	0.0149147	0.548198	-3.37568
STAG3L4	-0.227445	7.52788	-2.572	0.0149447	0.54866	-3.37748
AKT1S1	0.161951	7.21899	2.57001	0.0150159	0.550631	-3.38171
LOC643154	-0.183261	7.00829	-2.56865	0.0150646	0.551771	-3.3846
FLJ30375	-0.173968	6.94637	-2.56812	0.0150836	0.551796	-3.38572
RSRC2	0.268297	10.4172	2.56765	0.0151004	0.551796	-3.38671
LOC643341	-0.193028	6.96301	-2.56703	0.0151229	0.551976	-3.38804
AHCYL1	-0.193849	9.67189	-2.56649	0.0151424	0.552048	-3.38919
DBF4	0.169669	7.1675	2.56394	0.0152345	0.554123	-3.39459
LOC728249	0.235538	7.46664	2.56347	0.0152514	0.554123	-3.39558
NUDCD1	0.188647	7.64892	2.56291	0.0152718	0.554123	-3.39676
LOC100134609	-0.158927	6.90241	-2.56262	0.0152825	0.554123	-3.39739
DNAJB2	0.262149	8.58659	2.56248	0.0152875	0.554123	-3.39768
ZMYM5	0.165287	7.65554	2.56176	0.0153138	0.554437	-3.39921
LOC100133982	-0.151085	7.00711	-2.56002	0.0153772	0.555672	-3.40289
LINCR	0.161136	6.90425	2.55986	0.0153833	0.555672	-3.40325
CEP164	0.174834	7.70361	2.55923	0.015406	0.555856	-3.40456
LOC645333	-0.170215	6.90302	-2.55782	0.0154578	0.55604	-3.40755
CD46	-0.213302	9.87268	-2.55758	0.0154667	0.55604	-3.40806
C6orf66	0.250405	9.96474	2.55718	0.0154815	0.55604	-3.40891
HIST2H3A	0.182176	6.95054	2.55686	0.0154934	0.55604	-3.40959
SMPD3	-0.149491	6.87351	-2.55669	0.0154996	0.55604	-3.40995
PDIA5	-0.18951	8.79438	-2.55593	0.0155274	0.556129	-3.41155
ARL6IP6	-0.217583	9.89373	-2.55511	0.0155579	0.556129	-3.4133
LOC644808	-0.169146	6.8713	-2.5551	0.0155583	0.556129	-3.41332
DPYSL2	-0.19292	11.9974	-2.55414	0.0155936	0.556129	-3.41534
MRPL46	0.144501	10.2518	2.55399	0.0155991	0.556129	-3.41565
ULK1	-0.250116	9.34085	-2.55375	0.0156083	0.556129	-3.41617
LOC100131131	-0.183191	6.92066	-2.55194	0.0156755	0.557205	-3.42
TDRKH	-0.172789	7.03107	-2.55148	0.0156926	0.557205	-3.42097
SNORD12	0.184203	7.12106	2.5514	0.0156956	0.557205	-3.42114
APH1A	-0.16058	10.2825	-2.55086	0.0157156	0.557205	-3.42227
LOC650845	-0.171114	7.05961	-2.55003	0.0157466	0.557205	-3.42403
KCTD20	-0.251331	9.08655	-2.5497	0.0157592	0.557205	-3.42474
LOC653711	0.149846	7.03524	2.54961	0.0157626	0.557205	-3.42493
RARS2	-0.15331	9.41542	-2.54762	0.0158372	0.557735	-3.42914
USP8	0.201485	8.45771	2.54745	0.0158434	0.557735	-3.42948
ABHD2	-0.198841	7.52589	-2.54696	0.015862	0.557735	-3.43052
SIRPA	-0.146683	11.6095	-2.54695	0.0158622	0.557735	-3.43053
USP1	0.225458	10.0919	2.54662	0.0158745	0.557735	-3.43123
PDDC1	0.167574	7.98045	2.54633	0.0158857	0.557735	-3.43186
LOC100128525	0.459328	8.28662	2.5459	0.0159018	0.557735	-3.43276
TMEM144	-0.191818	8.30643	-2.54349	0.0159931	0.559601	-3.43785
GABRA2	-0.158921	6.7824	-2.54337	0.0159974	0.559601	-3.43809
MIR184	0.153064	6.90534	2.54223	0.0160408	0.559601	-3.4405
LOC100133276	0.165874	6.83928	2.54212	0.016045	0.559601	-3.44073
CDC5L	0.23901	9.14679	2.54207	0.016047	0.559601	-3.44084
C6orf203	0.238669	8.72466	2.54168	0.0160619	0.559601	-3.44167
C19orf26	-0.260575	7.09541	-2.54044	0.0161091	0.560624	-3.44428
PGCP	-0.19788	10.1348	-2.5399	0.0161295	0.560715	-3.4454
C5orf39	0.261286	9.21451	2.53865	0.0161776	0.560813	-3.44805
LOC651017	0.155171	6.93135	2.53831	0.0161906	0.560813	-3.44877
FLOT2	-0.18293	11.4982	-2.53824	0.0161931	0.560813	-3.44891
DPY19L3	-0.173708	7.22017	-2.53788	0.0162071	0.560813	-3.44967
CCT8L1	0.15221	6.86572	2.53692	0.0162439	0.560813	-3.45169
SKAP2	-0.160429	9.32199	-2.53639	0.0162645	0.560813	-3.45282
SLC8A2	-0.169189	6.81789	-2.53638	0.0162646	0.560813	-3.45282
FNBP1	-0.189843	10.5989	-2.53606	0.0162773	0.560813	-3.45351
LOC100133431	0.154972	6.78421	2.53504	0.0163164	0.560813	-3.45565
MLLT3	-0.178984	7.10225	-2.53488	0.0163226	0.560813	-3.45598
CLPTM1	-0.190927	9.34336	-2.5343	0.0163452	0.560813	-3.45722
MIR1302-3	-0.165957	6.86614	-2.53426	0.0163465	0.560813	-3.45729
LOC100133099	0.170215	7.27327	2.53341	0.0163797	0.561338	-3.45909
BEND6	-0.167813	7.41792	-2.53235	0.0164205	0.562125	-3.4613
LOC100129514	0.192932	7.01255	2.53158	0.0164505	0.562136	-3.46293
APLNR	0.177493	6.86642	2.53118	0.0164661	0.562136	-3.46377
HIST1H3B	0.158794	7.1164	2.53012	0.0165076	0.562136	-3.46601
ZNF250	0.208112	8.20372	2.52988	0.016517	0.562136	-3.46651
SCARNA4	0.159826	6.93833	2.52978	0.0165209	0.562136	-3.46672
HDGF	-0.157563	9.29677	-2.52895	0.0165534	0.562136	-3.46847
OR2AK2	0.182005	6.94119	2.52883	0.0165581	0.562136	-3.46872
MIR921	0.18458	6.87722	2.52856	0.0165684	0.562136	-3.46927
LOC648365	0.166902	7.05882	2.52822	0.0165818	0.562136	-3.46999
CHMP5	0.203804	10.5494	2.52759	0.0166065	0.562368	-3.47132
CYP2F1	0.156994	6.9855	2.52677	0.0166387	0.562435	-3.47303
SV2A	0.172968	6.9741	2.52663	0.0166444	0.562435	-3.47334
AEN	0.180658	8.73588	2.52618	0.0166622	0.562435	-3.47429
LOC100128507	-0.18154	7.05286	-2.52481	0.0167159	0.563312	-3.47715
PSMB2	-0.239542	11.5653	-2.52461	0.016724	0.563312	-3.47758
PHIP	0.198212	9.84849	2.52359	0.0167645	0.56407	-3.47973
CRYZL1	-0.183862	8.90089	-2.52307	0.0167848	0.564149	-3.4808
ZNF304	0.206938	7.44846	2.52139	0.0168515	0.565168	-3.48433
LOC652458	0.186395	7.14027	2.52118	0.0168601	0.565168	-3.48478
ATXN7L2	0.15271	7.61301	2.52014	0.0169016	0.565168	-3.48697
CXorf40B	0.21029	8.29225	2.5199	0.016911	0.565168	-3.48746
TARBP1	-0.190588	8.73904	-2.51965	0.0169212	0.565168	-3.48799
ZC3H7A	0.157825	9.51433	2.5193	0.0169349	0.565168	-3.48871
RCVRN	-0.158853	6.85837	-2.5188	0.016955	0.565168	-3.48976
RIF1	0.197529	7.85513	2.5178	0.0169953	0.565168	-3.49187
LOC654335	0.188523	6.91271	2.51777	0.0169962	0.565168	-3.49192
RRP1	0.250022	8.6377	2.51717	0.0170203	0.565168	-3.49318
TRIM11	0.159393	8.70552	2.51699	0.0170278	0.565168	-3.49357
CROP	0.355793	9.09398	2.51691	0.0170309	0.565168	-3.49373
LOC730134	-0.152383	7.26826	-2.51608	0.0170641	0.565672	-3.49546
LOC643790	-0.204623	9.16386	-2.51333	0.0171753	0.566207	-3.50123
CDV3	0.150432	10.5046	2.51201	0.0172288	0.566207	-3.50399
PSORS1C2	-0.166196	6.96023	-2.51145	0.0172515	0.566207	-3.50516
IFNAR2	-0.154711	9.49132	-2.51141	0.0172533	0.566207	-3.50525
BMP2	0.217769	7.75399	2.5106	0.0172862	0.566207	-3.50694
WDR64	-0.191099	6.95247	-2.50953	0.0173299	0.566207	-3.50918
TMEM168	-0.177218	7.43498	-2.50866	0.0173653	0.566207	-3.51099
SPANXN5	0.162963	6.93926	2.50843	0.0173747	0.566207	-3.51147
CNNM4	-0.187993	6.93227	-2.50822	0.0173833	0.566207	-3.51191
KRT78	-0.173452	7.01683	-2.50802	0.0173916	0.566207	-3.51234
LIG3	-0.206188	8.74861	-2.50742	0.0174161	0.566207	-3.51359
SLC9A6	-0.182831	8.23598	-2.50722	0.0174242	0.566207	-3.514
SNX16	0.150603	8.43869	2.50637	0.0174594	0.566207	-3.51579
LOC642669	0.141592	6.85803	2.50637	0.0174594	0.566207	-3.51579
LOC388796	0.205398	9.03647	2.50633	0.0174608	0.566207	-3.51586
B3GALNT1	-0.176982	8.45854	-2.5062	0.0174662	0.566207	-3.51613
RCE1	0.137206	8.81741	2.50588	0.0174792	0.566207	-3.51679
POLR3A	-0.173182	8.20151	-2.50567	0.0174882	0.566207	-3.51725
ZNF829	-0.136715	7.00477	-2.50552	0.0174941	0.566207	-3.51755
LOC650342	0.17734	6.8577	2.50511	0.0175113	0.566207	-3.51842
LOC647760	0.184775	6.88929	2.50416	0.0175503	0.566207	-3.52039
FAM189B	-0.212777	10.2984	-2.50402	0.0175561	0.566207	-3.52069
LOC652094	-0.153318	6.94514	-2.50402	0.0175561	0.566207	-3.52069
LOC100128771	-0.190997	9.14127	-2.5038	0.0175651	0.566207	-3.52114
ASB3	-0.167199	8.69743	-2.50242	0.0176224	0.566207	-3.52403
C20orf62	-0.195391	7.09743	-2.50216	0.0176332	0.566207	-3.52458
CACNA1H	0.150566	6.91413	2.50164	0.0176545	0.566207	-3.52565
HSPA1B	-0.238327	10.7864	-2.50154	0.0176587	0.566207	-3.52586
LOC650193	0.177783	6.90387	2.50095	0.0176832	0.566207	-3.52709
ANXA3	0.179962	6.91249	2.50093	0.017684	0.566207	-3.52713
FAM91A2	0.14816	7.07541	2.50054	0.0177002	0.566207	-3.52794
LOC646870	-0.168639	6.91194	-2.5005	0.017702	0.566207	-3.52803
DHX40	-0.154675	9.16429	-2.50037	0.0177074	0.566207	-3.5283
NUDT5	-0.131618	11.6496	-2.49942	0.0177472	0.566207	-3.53029
LOC641365	-0.159901	7.11384	-2.49893	0.0177675	0.566207	-3.53131
LOC646795	0.173469	7.09293	2.49892	0.0177681	0.566207	-3.53133
LOC643905	-0.193394	7.19713	-2.49888	0.0177696	0.566207	-3.53141
LOC284297	-0.177945	7.06506	-2.49782	0.0178141	0.566207	-3.53363
STX3	-0.174146	8.64638	-2.4976	0.0178231	0.566207	-3.53408
LOC440368	0.170864	6.86923	2.49759	0.0178235	0.566207	-3.5341
LOC648900	0.165974	6.88395	2.4974	0.0178317	0.566207	-3.53451
LOC644457	-0.15171	7.00916	-2.49727	0.017837	0.566207	-3.53477
LOC644802	0.155884	6.87793	2.49671	0.0178605	0.56638	-3.53593
LOC387870	0.1653	6.95965	2.4953	0.0179199	0.567693	-3.53888
KRT76	0.155758	6.92272	2.49435	0.0179598	0.568382	-3.54085
LOC441698	0.138227	7.02698	2.49309	0.0180129	0.569204	-3.54347
MIR1253	-0.212666	7.38554	-2.49285	0.0180232	0.569204	-3.54398
KRTAP12-1	-0.188865	6.91044	-2.49238	0.0180433	0.569204	-3.54496
HIST1H4E	0.178185	7.0568	2.49098	0.0181026	0.569204	-3.54787
LOC652845	0.158205	6.91926	2.49095	0.0181037	0.569204	-3.54793
LOC642648	0.171133	6.99233	2.49087	0.0181074	0.569204	-3.54811
NEUROD2	-0.169671	7.01649	-2.49075	0.0181125	0.569204	-3.54836
FAM59A	0.146858	7.1434	2.48888	0.018192	0.57098	-3.55224
SIGLEC12	0.186758	7.09411	2.48843	0.0182111	0.57098	-3.55317
LOC650852	-0.185813	7.01678	-2.48748	0.0182518	0.57098	-3.55515
LOC652140	0.156489	7.03571	2.48729	0.0182599	0.57098	-3.55554
GPR77	0.192318	6.89427	2.48686	0.0182783	0.57098	-3.55643
LOC642576	-0.161627	7.0032	-2.48661	0.0182892	0.57098	-3.55696
RPP40	0.137365	12.0969	2.48645	0.0182962	0.57098	-3.5573
ZFP57	0.165608	7.71559	2.48531	0.018345	0.571933	-3.55966
LOC730517	0.163574	7.04904	2.48293	0.0184476	0.573873	-3.5646
ZNF226	0.202143	7.3387	2.48255	0.0184641	0.573873	-3.56539
PPP5C	-0.223403	7.06627	-2.48219	0.0184798	0.573873	-3.56615
LOC643451	0.182422	7.026	2.48218	0.0184802	0.573873	-3.56617
KCNK5	-0.178854	7.62641	-2.48142	0.0185129	0.574321	-3.56773
LOC100130892	0.28101	12.8733	2.4807	0.0185444	0.574731	-3.56924
C1orf135	0.186701	8.50319	2.47986	0.0185809	0.575293	-3.57098
MEF2B	-0.192903	7.06129	-2.47808	0.0186583	0.577123	-3.57466
LOC644860	0.225883	7.40595	2.47708	0.0187022	0.577371	-3.57674
PLA2G1B	0.154673	6.88128	2.47705	0.0187035	0.577371	-3.5768
TAF9	0.338349	9.13507	2.47649	0.018728	0.577371	-3.57796
GPR153	0.145955	7.13185	2.47622	0.0187398	0.577371	-3.57852
LOC100130289	0.292981	7.50078	2.47516	0.0187864	0.578238	-3.58072
RNF12	-0.172812	7.06978	-2.4743	0.0188242	0.578834	-3.5825
LOC642720	0.142408	6.83282	2.47347	0.0188608	0.578932	-3.58422
RNF111	0.1797	7.06949	2.47339	0.0188642	0.578932	-3.58438
ECHDC1	0.299771	9.38744	2.47176	0.0189364	0.580271	-3.58776
LOC647596	0.15053	6.92155	2.47152	0.018947	0.580271	-3.58825
C12orf12	0.171645	6.84071	2.47078	0.01898	0.580271	-3.58979
PTHLH	-0.175206	7.04172	-2.47066	0.0189852	0.580271	-3.59004
TMEM109	-0.154516	9.87379	-2.47009	0.0190104	0.580271	-3.59121
TSC22D3	0.348993	9.0632	2.46991	0.0190186	0.580271	-3.59159
RFWD2	-0.141387	10.8614	-2.46778	0.0191136	0.582322	-3.596
PDF	0.212817	7.41625	2.46679	0.0191576	0.582322	-3.59803
FLJ31568	0.137215	6.96705	2.46657	0.0191676	0.582322	-3.5985
FAM104A	0.155606	9.88376	2.46624	0.0191824	0.582322	-3.59918
DDX59	0.164187	9.28904	2.46593	0.0191963	0.582322	-3.59982
LOC100129668	-0.152315	7.93825	-2.46591	0.019197	0.582322	-3.59985
DBH	-0.150028	6.77758	-2.46495	0.0192402	0.582582	-3.60184
DERA	-0.18822	11.2509	-2.4649	0.0192427	0.582582	-3.60196
FGFBP3	-0.164635	7.11236	-2.46415	0.0192762	0.58268	-3.6035
GLCCI1	0.150701	6.91543	2.46342	0.0193092	0.58268	-3.60501
PSPC1	0.187539	9.26857	2.46324	0.0193175	0.58268	-3.60539
WDR37	-0.19206	9.05812	-2.46318	0.0193201	0.58268	-3.60551
NPPA	0.181687	7.04525	2.4619	0.0193777	0.583296	-3.60814
ECHDC2	-0.167698	9.7056	-2.45937	0.0194926	0.583296	-3.61337
C4orf32	0.17221	8.28453	2.459	0.0195095	0.583296	-3.61414
TCTN1	-0.224846	7.77617	-2.45837	0.0195379	0.583296	-3.61542
MIR1251	0.15985	6.95363	2.45796	0.0195569	0.583296	-3.61628
DNAJC17	0.213066	8.07502	2.45768	0.0195694	0.583296	-3.61685
SKAP1	0.163602	6.86391	2.45765	0.019571	0.583296	-3.61692
LONRF3	0.189593	7.39736	2.45696	0.0196026	0.583296	-3.61835
PFTK1	-0.213416	7.2674	-2.45687	0.0196065	0.583296	-3.61852
DMRTB1	-0.151234	6.86002	-2.45642	0.0196271	0.583296	-3.61945
SLC25A18	0.142832	6.99938	2.45632	0.0196316	0.583296	-3.61965
LOC286512	0.365492	9.95057	2.4557	0.0196602	0.583296	-3.62094
ST3GAL6	-0.173567	7.62039	-2.45548	0.0196701	0.583296	-3.62139
VGF	0.195591	7.31518	2.45538	0.0196748	0.583296	-3.6216
LOC729217	-0.173267	11.3699	-2.45517	0.0196845	0.583296	-3.62203
LOC646303	0.164134	7.03821	2.45464	0.0197089	0.583296	-3.62313
LOC100128750	0.179013	7.04946	2.45422	0.019728	0.583296	-3.62398
RAB22A	-0.149521	8.64741	-2.45414	0.0197316	0.583296	-3.62415
C1orf170	0.160593	7.15196	2.45414	0.0197317	0.583296	-3.62415
ZC3H8	0.165088	8.56394	2.45396	0.0197401	0.583296	-3.62453
H1F0	0.204537	7.15579	2.45274	0.0197962	0.583296	-3.62703
MYC	0.167351	12.8567	2.45272	0.0197973	0.583296	-3.62708
ATXN7L3	0.163905	8.54087	2.45183	0.0198384	0.583296	-3.62891
C8orf83	-0.174315	7.84673	-2.4517	0.0198443	0.583296	-3.62918
TMEM9	0.159949	7.83149	2.45161	0.0198486	0.583296	-3.62937
LOC646299	-0.168146	6.9212	-2.4512	0.0198672	0.583296	-3.6302
UBTD1	-0.190324	7.518	-2.45109	0.0198725	0.583296	-3.63043
C11orf82	0.180719	9.48584	2.45085	0.0198834	0.583296	-3.63092
BRIP1	0.173041	7.07917	2.45081	0.0198853	0.583296	-3.631
FAM108B1	0.25858	8.24567	2.45055	0.0198975	0.583296	-3.63155
DNAH17	-0.149217	6.78682	-2.44965	0.0199393	0.583296	-3.6334
XAGE1C	0.238303	11.6262	2.44906	0.0199667	0.583296	-3.63462
LOC646841	0.18779	7.15049	2.44891	0.0199738	0.583296	-3.63493
NDNL2	0.162645	7.72751	2.44878	0.0199798	0.583296	-3.63519
MICB	-0.17274	8.6147	-2.44854	0.0199908	0.583296	-3.63568
MAP2K2	-0.368358	8.71581	-2.44784	0.0200236	0.583296	-3.63713
ZNF700	0.167622	9.21196	2.4473	0.0200485	0.583296	-3.63823
PDXK	-0.161865	9.93962	-2.44668	0.0200777	0.583296	-3.63951
OPHN1	0.164607	6.9516	2.4455	0.0201328	0.583296	-3.64193
MUS81	0.188012	8.5203	2.44527	0.0201434	0.583296	-3.6424
TTTY4	0.225004	6.88447	2.44479	0.020166	0.583296	-3.64339
LOC342918	0.155042	6.92249	2.44467	0.0201714	0.583296	-3.64363
DNMT3A	-0.158293	7.09201	-2.44454	0.0201779	0.583296	-3.64391
LOC652582	-0.20797	6.98369	-2.44431	0.0201887	0.583296	-3.64438
C10orf30	-0.210951	6.9643	-2.44423	0.0201924	0.583296	-3.64455
TTC30B	-0.19829	7.11912	-2.44419	0.0201943	0.583296	-3.64463
TMEM99	0.140151	9.63639	2.4434	0.0202313	0.583678	-3.64625
LOC643768	-0.19423	7.16264	-2.44292	0.0202541	0.583678	-3.64724
SNORD49A	0.205718	7.40568	2.44272	0.0202634	0.583678	-3.64764
LOC643614	0.178707	7.02465	2.44188	0.0203031	0.583678	-3.64937
DNAI2	-0.164629	6.8668	-2.44162	0.0203151	0.583678	-3.6499
LOC442319	0.138193	6.93089	2.44154	0.0203189	0.583678	-3.65006
RFPL4A	-0.211118	7.20175	-2.4402	0.0203823	0.584265	-3.65281
TBX6	0.154853	7.03115	2.44008	0.020388	0.584265	-3.65306
LOC649897	0.159728	7.1932	2.43993	0.0203952	0.584265	-3.65337
TSPAN19	0.177585	6.96289	2.43827	0.0204738	0.584961	-3.65677
TTTY5	0.157066	7.02309	2.43825	0.0204748	0.584961	-3.65681
QARS	-0.166255	12.9006	-2.43788	0.0204924	0.584961	-3.65757
DLX2	0.237881	7.09031	2.43785	0.0204939	0.584961	-3.65763
C21orf121	0.173143	6.93038	2.43612	0.0205766	0.586789	-3.66119
LOC642950	-0.195354	6.98068	-2.43501	0.0206294	0.587761	-3.66345
ANO5	0.148709	6.81739	2.43447	0.0206553	0.587772	-3.66456
ACTA2	-0.224044	9.09567	-2.43423	0.0206672	0.587772	-3.66507
HSFY2	0.168345	7.09068	2.4337	0.0206926	0.587961	-3.66615
LOC729566	-0.180407	6.95139	-2.43315	0.0207189	0.588177	-3.66727
RABL2B	-0.197768	8.53207	-2.43201	0.0207737	0.589097	-3.6696
LOC645711	0.131859	6.94687	2.43066	0.0208388	0.589097	-3.67236
ALG8	-0.161572	10.8345	-2.43046	0.0208485	0.589097	-3.67278
FLJ10324	0.189777	6.93389	2.43019	0.0208615	0.589097	-3.67333
LOC643626	-0.175298	6.95096	-2.43018	0.0208621	0.589097	-3.67335
C21orf54	0.151858	6.96847	2.43005	0.0208686	0.589097	-3.67363
LOC390298	0.171693	8.24084	2.42966	0.0208871	0.589097	-3.67441
RAB18	0.195233	7.48857	2.42929	0.0209051	0.589097	-3.67517
THAP5	0.173074	7.03705	2.42853	0.0209423	0.589097	-3.67673
DNAH6	-0.155144	6.94544	-2.42831	0.0209528	0.589097	-3.67718
CDC42EP4	-0.179756	9.73525	-2.42777	0.0209793	0.589097	-3.67829
ZNF75A	0.219445	7.45632	2.42748	0.0209929	0.589097	-3.67886
BIRC6	-0.182031	7.99694	-2.42744	0.020995	0.589097	-3.67895
LOC100131308	-0.138867	7.02274	-2.42573	0.0210784	0.589237	-3.68245
LOC729350	-0.157959	6.95227	-2.42537	0.021096	0.589237	-3.68319
TLR10	-0.152076	7.03053	-2.42513	0.0211077	0.589237	-3.68367
RAB4A	-0.166434	8.58626	-2.42443	0.0211422	0.589237	-3.68511
API5	-0.234058	9.58889	-2.42426	0.0211504	0.589237	-3.68546
BCR	0.160659	7.22944	2.42377	0.0211743	0.589237	-3.68645
MREG	-0.149088	7.08978	-2.42323	0.0212009	0.589237	-3.68756
RARRES2	-0.230178	6.96748	-2.42322	0.0212013	0.589237	-3.68758
C15orf56	0.149728	6.76749	2.4231	0.0212074	0.589237	-3.68783
C4orf43	0.175365	7.08108	2.42291	0.0212164	0.589237	-3.68821
XRN1	0.153549	8.21817	2.42181	0.0212707	0.589237	-3.69046
VGLL4	-0.191089	8.68396	-2.42116	0.0213027	0.589237	-3.69178
LOC646309	0.143447	6.92771	2.4211	0.0213055	0.589237	-3.6919
ACTL7A	0.203205	6.77465	2.42107	0.0213074	0.589237	-3.69198
C9orf169	0.181336	7.15643	2.42106	0.0213075	0.589237	-3.69199
KIF21A	-0.16368	7.08518	-2.42025	0.0213478	0.589237	-3.69365
LOC642936	0.153134	6.9405	2.42023	0.0213485	0.589237	-3.69368
TMEM87B	-0.147361	7.00767	-2.42016	0.0213522	0.589237	-3.69383
LOC441582	-0.176083	6.89408	-2.41963	0.0213786	0.589237	-3.69492
LOC646428	-0.157541	6.8417	-2.41962	0.0213789	0.589237	-3.69493
C2orf34	-0.170255	7.6775	-2.41873	0.021423	0.589237	-3.69675
HIC2	0.182866	8.59838	2.41868	0.0214253	0.589237	-3.69685
LOC649282	-0.137958	7.06894	-2.41801	0.0214587	0.589237	-3.69822
LOC100132715	0.182626	11.9844	2.4179	0.0214643	0.589237	-3.69845
LOC646537	-0.143703	6.8726	-2.41724	0.021497	0.589237	-3.69979
MLKL	-0.192384	10.7144	-2.41712	0.0215031	0.589237	-3.70004
LOC391359	0.14823	6.8738	2.41705	0.0215062	0.589237	-3.70017
BTLA	0.18285	7.07088	2.41627	0.021545	0.589355	-3.70176
LOC441869	0.157047	6.82892	2.41621	0.021548	0.589355	-3.70188
RHOT1	-0.185783	9.47888	-2.41535	0.0215913	0.589384	-3.70365
LOC653257	0.142157	7.07806	2.41523	0.0215969	0.589384	-3.70388
CCDC146	0.151206	7.03478	2.41424	0.0216468	0.589384	-3.70591
ARID4A	0.180424	7.75613	2.41391	0.0216633	0.589384	-3.70658
ZNF583	0.17509	7.45557	2.41382	0.0216678	0.589384	-3.70676
MGC2752	0.198272	7.38087	2.41361	0.0216782	0.589384	-3.70719
GPR158L1	0.165731	7.03956	2.41343	0.0216874	0.589384	-3.70756
LOC642044	-0.18155	6.8764	-2.41319	0.0216991	0.589384	-3.70804
DPH3	0.161687	9.17163	2.41271	0.0217233	0.589529	-3.70902
VRK2	0.249046	8.05586	2.41205	0.0217565	0.589848	-3.71036
GRB14	-0.171798	7.13143	-2.41173	0.0217725	0.589848	-3.71101
LOC100131905	0.26789	13.4529	2.41024	0.0218475	0.590608	-3.71404
LOC100130764	-0.21115	7.50356	-2.40984	0.0218676	0.590608	-3.71485
LOC100130361	-0.194724	7.02477	-2.40977	0.0218714	0.590608	-3.71501
WDR47	0.19751	7.658	2.40907	0.0219069	0.590608	-3.71644
LOC144383	-0.15055	6.94856	-2.40898	0.0219115	0.590608	-3.71662
UNQ9433	0.166745	7.03456	2.40894	0.0219133	0.590608	-3.71669
CAMK4	0.152765	6.96038	2.40851	0.021935	0.590685	-3.71756
ICK	-0.18255	7.93799	-2.40738	0.0219924	0.591462	-3.71987
PKP4	-0.145077	9.59027	-2.4072	0.0220015	0.591462	-3.72023
ARAP1	0.170376	7.77351	2.40595	0.0220649	0.592609	-3.72276
DEXI	-0.157105	10.1644	-2.40562	0.0220819	0.592609	-3.72344
DCP1A	0.189874	7.98539	2.40523	0.0221017	0.592636	-3.72423
CSPP1	0.195755	9.28848	2.40408	0.0221606	0.593708	-3.72658
SNORA7A	-0.162864	7.08119	-2.40286	0.022223	0.594011	-3.72905
ZNF165	0.161676	7.86388	2.40275	0.0222284	0.594011	-3.72926
LOC644132	0.143502	9.30995	2.40275	0.0222286	0.594011	-3.72928
TMEM18	0.183072	7.69909	2.40164	0.0222854	0.594623	-3.73152
C21orf89	0.202598	6.91858	2.4013	0.0223028	0.594623	-3.73221
CETN2	-0.211897	10.5691	-2.40115	0.0223107	0.594623	-3.73252
ASAP3	0.152549	7.01509	2.40083	0.0223272	0.594623	-3.73317
PLEKHO2	0.183761	7.68077	2.39973	0.0223839	0.595518	-3.7354
FLJ33360	0.141753	6.79336	2.39944	0.0223987	0.595518	-3.73599
SAMM50	-0.147923	11.1327	-2.39832	0.0224566	0.5957	-3.73826
ARGLU1	0.195789	10.7956	2.39775	0.022486	0.5957	-3.73941
MIR572	-0.203796	7.0279	-2.39771	0.0224885	0.5957	-3.73951
SFRS8	0.183372	8.38023	2.3973	0.0225096	0.5957	-3.74033
POMGNT1	-0.223941	9.0309	-2.39715	0.0225175	0.5957	-3.74064
SUV39H2	0.167503	7.25441	2.39665	0.0225432	0.5957	-3.74165
DIXDC1	-0.153896	7.45139	-2.39656	0.0225479	0.5957	-3.74183
CDX1	-0.177284	6.88541	-2.39638	0.0225572	0.5957	-3.74219
ARHGAP18	0.20061	7.28896	2.39585	0.0225848	0.595929	-3.74327
TCFL5	-0.182527	8.50129	-2.39465	0.0226472	0.596766	-3.7457
CBR1	-0.176289	8.40622	-2.39424	0.0226689	0.596766	-3.74654
IGFBP3	0.152663	7.03718	2.39415	0.0226736	0.596766	-3.74672
C6orf106	-0.161985	7.888	-2.39339	0.0227133	0.597312	-3.74826
SLC27A3	-0.210599	8.74905	-2.39181	0.0227957	0.598978	-3.75145
ATP2C1	-0.206122	8.00394	-2.3911	0.0228332	0.599029	-3.75289
LOC388177	0.158924	6.90989	2.391	0.0228386	0.599029	-3.7531
LOC731159	-0.177246	6.94692	-2.38998	0.0228921	0.599029	-3.75516
LOC653066	0.161565	8.06954	2.38937	0.0229243	0.599029	-3.7564
DYNC1I2	-0.188726	10.3408	-2.38889	0.0229496	0.599029	-3.75736
LOC650162	-0.142984	6.90153	-2.38831	0.0229803	0.599029	-3.75854
PFKL	-0.182238	9.21594	-2.38829	0.022981	0.599029	-3.75857
MPHOSPH6	0.241356	8.36002	2.38828	0.0229816	0.599029	-3.75859
SWAP70	-0.155322	9.6844	-2.3878	0.0230074	0.599029	-3.75958
PTTG1	-0.168088	12.1723	-2.38778	0.0230081	0.599029	-3.75961
MAPK14	-0.165502	8.37486	-2.38735	0.0230312	0.599029	-3.76049
LOC400986	0.195881	7.24433	2.38724	0.0230371	0.599029	-3.76071
FERMT1	-0.214745	7.95087	-2.38657	0.0230724	0.599029	-3.76206
ADH1C	0.146484	6.91718	2.38656	0.0230728	0.599029	-3.76208
GLCE	-0.193213	7.80275	-2.38573	0.0231171	0.599029	-3.76376
LOC643274	-0.171911	6.95074	-2.38566	0.0231208	0.599029	-3.7639
LOC647008	-0.202726	6.88851	-2.3852	0.0231453	0.599029	-3.76483
LOC100129532	-0.147995	7.07257	-2.38479	0.0231669	0.599029	-3.76565
LOC100128372	-0.164361	6.91222	-2.38474	0.0231697	0.599029	-3.76576
CSTF2T	0.21702	7.59647	2.38443	0.0231863	0.599029	-3.76639
MAPK1IP1L	0.173308	7.02933	2.38406	0.023206	0.599029	-3.76714
IL2RG	0.170467	6.95538	2.38385	0.023217	0.599029	-3.76755
LOC643324	0.169934	7.01117	2.38318	0.0232525	0.599454	-3.7689
MIR298	0.163	6.93216	2.38206	0.0233127	0.600513	-3.77117
CDC25C	-0.150079	8.44039	-2.3807	0.0233858	0.601535	-3.77392
LOC388925	-0.172866	7.06317	-2.3806	0.0233907	0.601535	-3.7741
CRTC2	0.191964	7.68881	2.37958	0.0234455	0.602452	-3.77616
FCGR1A	-0.201905	9.29431	-2.3791	0.0234715	0.602541	-3.77714
LOC100130828	0.154241	6.88069	2.37846	0.0235059	0.602541	-3.77842
SDR9C7	-0.171041	7.06495	-2.37845	0.0235065	0.602541	-3.77845
ZNF323	0.163697	8.1717	2.37681	0.0235953	0.604086	-3.78176
RASD1	0.15358	6.9901	2.37637	0.023619	0.604086	-3.78264
NMUR2	-0.151626	6.7787	-2.37625	0.0236254	0.604086	-3.78288
ZC3HC1	0.141144	10.8888	2.37592	0.0236437	0.604086	-3.78356
LOC389316	0.158344	6.85267	2.37537	0.0236735	0.604194	-3.78467
CFTR	-0.174603	7.02771	-2.37513	0.0236863	0.604194	-3.78514
HAUS4	-0.151623	9.86806	-2.37374	0.0237622	0.604768	-3.78795
LOC100128675	-0.15556	7.13491	-2.37366	0.0237663	0.604768	-3.7881
ARAP3	0.152252	7.22177	2.37366	0.0237666	0.604768	-3.78811
NTF4	-0.139608	6.97543	-2.37298	0.0238035	0.604869	-3.78948
LOC100133042	-0.139003	6.99571	-2.37232	0.0238396	0.604869	-3.79081
SNW1	0.157634	9.47451	2.37204	0.0238548	0.604869	-3.79137
BTF3L4	-0.181312	9.62913	-2.37189	0.0238628	0.604869	-3.79166
MBNL3	-0.149324	7.1643	-2.3716	0.0238786	0.604869	-3.79224
DRGX	-0.169563	6.99887	-2.37147	0.023886	0.604869	-3.79252
OR51A4	0.135995	6.79902	2.37107	0.0239077	0.60493	-3.79331
KHNYN	-0.142232	7.44326	-2.36991	0.0239712	0.606049	-3.79564
USP7	-0.178586	8.2907	-2.36891	0.0240262	0.6061	-3.79766
GDF6	-0.170391	6.92322	-2.36834	0.024058	0.6061	-3.79882
COG8	0.18643	7.52609	2.36821	0.024065	0.6061	-3.79907
UBE2L3	-0.177241	9.08202	-2.36812	0.02407	0.6061	-3.79926
CC2D1B	-0.163262	7.42349	-2.36798	0.0240778	0.6061	-3.79954
IFNA10	-0.154024	6.89527	-2.36774	0.0240908	0.6061	-3.80001
GLRA1	-0.167979	6.89264	-2.36709	0.0241268	0.6061	-3.80133
TRNT1	0.192186	8.92006	2.36708	0.0241275	0.6061	-3.80135
SLC3A2	0.226924	9.50015	2.36658	0.0241547	0.606299	-3.80234
RNF169	0.151605	7.3718	2.36574	0.0242014	0.606536	-3.80404
LOC100129751	-0.137027	6.99517	-2.36555	0.0242119	0.606536	-3.80442
LOC100129548	0.149862	6.87841	2.36537	0.0242221	0.606536	-3.80479
SCARB2	-0.175847	9.29172	-2.36462	0.0242635	0.606917	-3.80629
ECHS1	-0.12959	11.3833	-2.3644	0.0242759	0.606917	-3.80673
TMEM120A	-0.140318	8.54079	-2.3635	0.0243259	0.607684	-3.80854
LOC100130288	-0.16265	7.0068	-2.36298	0.0243546	0.607917	-3.80958
C4BPB	0.150903	6.97588	2.36152	0.0244361	0.609153	-3.81251
MMADHC	0.198552	11.1838	2.3614	0.0244429	0.609153	-3.81275
COG6	-0.165658	8.74341	-2.3606	0.0244875	0.609781	-3.81435
S100A2	-0.183086	6.85752	-2.3599	0.0245269	0.610141	-3.81576
LOC100128460	-0.161659	7.01066	-2.35965	0.0245408	0.610141	-3.81626
IL8RBP	-0.150684	6.94048	-2.35868	0.0245952	0.610595	-3.8182
FAM18B2	0.207434	8.3252	2.35819	0.0246231	0.610595	-3.8192
CCDC74A	-0.145062	6.87337	-2.35813	0.0246265	0.610595	-3.81932
BCL8	0.157965	6.89075	2.35794	0.0246368	0.610595	-3.81968
IGFBPL1	0.162017	7.03308	2.35656	0.0247145	0.610731	-3.82245
LOC642636	-0.194598	7.19106	-2.3562	0.0247353	0.610731	-3.82318
LOC100134174	-0.1679	6.90567	-2.35597	0.0247479	0.610731	-3.82363
RCC1	-0.167336	7.9186	-2.35576	0.0247597	0.610731	-3.82405
CD96	-0.155057	6.84669	-2.35572	0.024762	0.610731	-3.82413
PGRMC1	-0.181105	10.6755	-2.35554	0.0247725	0.610731	-3.8245
PDCD2L	0.183701	9.43281	2.35515	0.0247942	0.610731	-3.82527
LOXL3	0.161563	6.98515	2.35455	0.0248286	0.610731	-3.82649
MGC52498	-0.173929	7.12929	-2.35363	0.0248809	0.610731	-3.82833
ZYG11B	-0.189122	8.95831	-2.35354	0.0248857	0.610731	-3.8285
COPS2	0.307588	8.20234	2.35336	0.0248957	0.610731	-3.82886
AOAH	-0.193147	7.35389	-2.35329	0.0248999	0.610731	-3.829
PTDSS1	-0.148955	12.653	-2.35313	0.024909	0.610731	-3.82932
JARID2	0.165659	10.2715	2.35262	0.0249381	0.610731	-3.83035
GJB1	0.146598	7.01438	2.3525	0.0249452	0.610731	-3.8306
LOC652065	0.13442	6.8949	2.35222	0.0249607	0.610731	-3.83114
LOC728543	0.160979	6.87918	2.3513	0.0250135	0.610731	-3.83299
MIR154	-0.155471	6.90795	-2.35028	0.0250713	0.610731	-3.83502
ZNF202	0.167124	7.24257	2.34998	0.0250887	0.610731	-3.83563
SFTPD	0.178181	7.04037	2.34973	0.0251033	0.610731	-3.83614
LOC649752	-0.132449	6.88652	-2.34952	0.0251149	0.610731	-3.83654
LOC645278	-0.142383	6.99817	-2.34862	0.0251669	0.610731	-3.83835
SGK269	-0.150932	6.81146	-2.34828	0.0251864	0.610731	-3.83903
STIP1	-0.179053	10.9663	-2.34794	0.0252057	0.610731	-3.83971
LOC100133200	-0.198565	7.19471	-2.34739	0.0252371	0.610731	-3.8408
JAK1	-0.17238	7.64873	-2.3469	0.0252655	0.610731	-3.84178
TBL1X	-0.256389	9.07987	-2.34677	0.0252729	0.610731	-3.84204
MPND	0.149333	7.35311	2.34671	0.0252764	0.610731	-3.84216
PRKCG	-0.134848	6.86269	-2.34665	0.0252797	0.610731	-3.84228
PSG5	0.135975	7.0344	2.34601	0.0253169	0.610731	-3.84356
RPL23AP53	0.147991	8.41551	2.34582	0.0253276	0.610731	-3.84393
MPPED1	0.146964	7.0814	2.34581	0.0253282	0.610731	-3.84396
FBXO28	0.153795	9.65681	2.34568	0.0253362	0.610731	-3.84423
NOP2	0.189068	11.1914	2.3453	0.0253579	0.610731	-3.84498
C22orf9	-0.157004	9.50139	-2.34477	0.0253885	0.610731	-3.84604
IGSF9B	0.155206	7.07693	2.34357	0.0254579	0.610731	-3.84843
MPL	0.150798	6.77476	2.34353	0.0254604	0.610731	-3.84852
ANKRD44	0.141777	6.9737	2.34353	0.0254605	0.610731	-3.84852
PCDHGB1	0.134096	6.88321	2.34339	0.0254686	0.610731	-3.8488
KCNJ11	0.161944	6.71965	2.34289	0.0254975	0.610731	-3.84979
FAM151A	0.148448	7.08979	2.34258	0.0255155	0.610731	-3.85041
C19orf12	-0.197141	9.30182	-2.34211	0.0255428	0.610731	-3.85135
SELI	-0.154751	7.83947	-2.34193	0.0255534	0.610731	-3.85171
HS3ST1	0.169845	7.09695	2.34177	0.0255625	0.610731	-3.85202
KLHL12	-0.145085	9.89033	-2.34176	0.025563	0.610731	-3.85204
LOC643718	0.15805	6.94032	2.34172	0.0255652	0.610731	-3.85212
LOC100131734	-0.164366	6.87855	-2.34145	0.0255815	0.610731	-3.85267
LOC652757	-0.200863	6.90832	-2.34111	0.0256012	0.610731	-3.85335
PPBPL2	-0.168383	6.98294	-2.34041	0.0256417	0.610731	-3.85474
AACS	-0.171714	7.53635	-2.34013	0.0256584	0.610731	-3.85531
MIR362	0.1693	6.84598	2.3396	0.0256889	0.610731	-3.85635
NOMO2	0.155876	10.0144	2.3396	0.025689	0.610731	-3.85635
ITIH4	-0.166823	6.78402	-2.33932	0.0257056	0.610731	-3.85691
C14orf147	-0.174281	8.7004	-2.33911	0.0257181	0.610731	-3.85734
CDC2L6	-0.158175	9.8501	-2.33879	0.0257365	0.610731	-3.85797
LOC100130900	0.13897	6.99409	2.33869	0.0257423	0.610731	-3.85816
LOC100131017	-0.165134	7.54116	-2.33856	0.02575	0.610731	-3.85843
EBI3	-0.14325	6.7947	-2.33752	0.025811	0.611058	-3.8605
LOC650498	0.144039	6.8232	2.33739	0.0258185	0.611058	-3.86075
LOC644124	-0.215762	7.39232	-2.33733	0.0258221	0.611058	-3.86088
MEGF8	-0.136279	7.11321	-2.337	0.0258415	0.611058	-3.86153
EVC2	-0.14455	6.77308	-2.33621	0.0258879	0.611694	-3.8631
PCIF1	-0.176572	7.25173	-2.33454	0.0259867	0.613374	-3.86644
PPP3CB	-0.137354	9.92238	-2.33435	0.025998	0.613374	-3.86682
LOC654189	0.254484	8.18164	2.33377	0.0260319	0.61362	-3.86796
LOC100132276	0.119298	6.83376	2.33325	0.026063	0.61362	-3.86901
ZFAND2A	0.198815	10.0152	2.33269	0.0260962	0.61362	-3.87012
RNF43	0.153858	6.75557	2.33263	0.0260998	0.61362	-3.87024
KLF16	-0.164179	6.87001	-2.33252	0.0261061	0.61362	-3.87045
CARM1	-0.158807	10.4992	-2.33173	0.0261532	0.614269	-3.87203
FLJ43987	0.162126	6.81604	2.33082	0.0262071	0.614867	-3.87384
LOC648792	-0.17378	6.87851	-2.33026	0.0262405	0.614867	-3.87495
LOC729646	0.250568	11.2704	2.33003	0.0262544	0.614867	-3.87541
TCF15	-0.139716	6.82361	-2.32973	0.0262719	0.614867	-3.876
SAMSN1	0.226614	8.87663	2.32948	0.0262872	0.614867	-3.87651
ZNF684	0.170292	7.65944	2.32933	0.0262961	0.614867	-3.8768
SCRN1	0.136669	6.80516	2.32897	0.0263176	0.614913	-3.87752
ERI1	-0.146204	9.88473	-2.32829	0.0263583	0.615327	-3.87887
STK38L	-0.193478	7.18422	-2.32802	0.0263745	0.615327	-3.87941
LOC648364	0.168801	7.06906	2.32747	0.0264075	0.615547	-3.8805
RFPL3S	-0.150091	6.9286	-2.32721	0.0264231	0.615547	-3.88102
ST8SIA5	-0.199847	7.83822	-2.3263	0.0264777	0.616361	-3.88282
LOC729694	-0.1715	6.83973	-2.32534	0.0265354	0.61721	-3.88473
PRR20C	-0.155282	6.95429	-2.32504	0.0265534	0.61721	-3.88532
ZNF395	-0.154082	9.84625	-2.32422	0.0266026	0.617489	-3.88694
LOC100129461	-0.14202	7.1926	-2.32401	0.0266155	0.617489	-3.88737
LOC643358	0.127881	14.5986	2.32369	0.0266346	0.617489	-3.88799
EIF1	0.182885	11.8987	2.32354	0.026644	0.617489	-3.8883
PARP1	-0.14449	12.014	-2.32243	0.026711	0.618584	-3.8905
RFC5	-0.135739	10.3776	-2.32141	0.0267728	0.619559	-3.89252
LPAR4	-0.219976	7.41314	-2.31869	0.0269382	0.622319	-3.89791
MYNN	0.163502	8.55402	2.3185	0.0269498	0.622319	-3.89828
HOXA9	0.163049	11.0737	2.31826	0.0269643	0.622319	-3.89876
IL17RB	0.175293	7.05601	2.31815	0.0269712	0.622319	-3.89898
LOC100132184	0.150441	6.89106	2.31726	0.0270258	0.622535	-3.90075
TCEB3CL2	-0.140257	6.87378	-2.31689	0.0270484	0.622535	-3.90148
LOC401286	-0.139628	7.04661	-2.31662	0.0270652	0.622535	-3.90202
VCP	-0.234759	10.4285	-2.31658	0.0270677	0.622535	-3.9021
GATA4	-0.152476	6.84304	-2.31638	0.0270797	0.622535	-3.90249
TMEM138	0.184021	9.38735	2.31542	0.0271383	0.623427	-3.90438
HYLS1	0.21095	8.326	2.31476	0.0271793	0.623816	-3.9057
ARMS2	0.146426	6.93441	2.31439	0.0272018	0.623816	-3.90642
OSBPL9	-0.184763	9.50323	-2.31418	0.0272148	0.623816	-3.90684
LOC100129882	0.564743	9.83537	2.31322	0.0272742	0.624476	-3.90874
PISD	-0.143893	8.4317	-2.31307	0.0272833	0.624476	-3.90904
GADD45A	0.195427	8.32181	2.31238	0.0273258	0.624994	-3.9104
RWDD2B	-0.152636	7.59598	-2.31163	0.0273723	0.625601	-3.91188
OR2AG1	-0.141352	6.85436	-2.3113	0.0273929	0.625618	-3.91254
LOC283487	0.140437	7.04968	2.30976	0.0274881	0.626831	-3.91557
TRIM27	0.177631	8.92415	2.30852	0.0275655	0.626831	-3.91803
CRYBA2	-0.162879	7.10706	-2.30823	0.0275836	0.626831	-3.9186
KCNAB1	0.168159	7.07401	2.30781	0.0276101	0.626831	-3.91944
GALIG	0.168944	6.98012	2.30758	0.0276244	0.626831	-3.91989
ICOSLG	0.170741	7.68314	2.30757	0.0276251	0.626831	-3.91992
LOC644936	0.40134	10.6109	2.3074	0.0276355	0.626831	-3.92024
RPH3AL	-0.168565	7.00624	-2.30714	0.0276517	0.626831	-3.92076
FLJ44955	-0.15613	6.83551	-2.30707	0.0276562	0.626831	-3.9209
ZNF140	0.173422	7.36652	2.30706	0.0276564	0.626831	-3.9209
ZNF543	0.176267	7.29381	2.30692	0.0276655	0.626831	-3.92119
NAAA	-0.188519	8.51892	-2.30638	0.027699	0.627139	-3.92225
GUCA2B	-0.139925	6.99219	-2.30596	0.0277254	0.627284	-3.92308
LMX1B	0.138466	6.99202	2.30556	0.0277504	0.627398	-3.92387
PCYOX1	-0.184802	7.9062	-2.30494	0.0277897	0.627835	-3.9251
FAM123C	0.133544	6.9464	2.30441	0.027823	0.62788	-3.92615
ZNF235	0.15152	7.38365	2.30427	0.0278316	0.62788	-3.92642
ATP6V1D	-0.158896	10.3434	-2.30381	0.0278605	0.62808	-3.92733
KIAA1600	-0.183665	8.27154	-2.30341	0.0278856	0.628196	-3.92811
SNORA38B	0.157859	7.05827	2.30262	0.0279355	0.628869	-3.92968
SFRS14	-0.182043	9.7667	-2.30127	0.0280206	0.629407	-3.93233
TRIM6	-0.151596	6.90672	-2.30127	0.0280206	0.629407	-3.93233
SCARNA9	0.188098	7.71676	2.30072	0.0280553	0.629407	-3.93341
C14orf166B	-0.172307	7.06525	-2.30053	0.0280674	0.629407	-3.93379
ZC3H14	-0.148771	7.94476	-2.30052	0.0280682	0.629407	-3.93381
CYB5D1	0.174968	8.24103	2.3	0.0281012	0.629407	-3.93484
LOC645151	0.153081	6.96244	2.29983	0.0281118	0.629407	-3.93517
LOC646324	0.193059	6.89958	2.29968	0.0281215	0.629407	-3.93547
ZNF324	0.177256	7.59273	2.29939	0.0281397	0.629407	-3.93603
dJ341D10.1	0.165134	7.83008	2.29805	0.0282248	0.630164	-3.93867
SETD5	-0.196128	7.29731	-2.29771	0.0282465	0.630164	-3.93934
LOC387762	-0.132419	6.99792	-2.29767	0.0282492	0.630164	-3.93942
BCL7A	-0.195491	7.5108	-2.2976	0.0282537	0.630164	-3.93956
PPIL6	-0.133347	6.80112	-2.29708	0.0282868	0.630396	-3.94059
PLEKHH3	-0.177623	7.51544	-2.29628	0.0283377	0.630396	-3.94216
TTTY10	0.163566	6.93641	2.29534	0.0283982	0.630396	-3.94402
FABP1	-0.142924	7.00941	-2.29517	0.0284092	0.630396	-3.94435
GOLGA8A	-0.157502	6.98085	-2.29506	0.0284161	0.630396	-3.94456
ZNF622	0.13618	10.624	2.29502	0.0284187	0.630396	-3.94464
GAGE12D	-0.157949	6.83259	-2.29486	0.0284287	0.630396	-3.94495
LOC647281	-0.146413	6.90177	-2.29482	0.0284316	0.630396	-3.94504
LOC652217	0.1365	6.89119	2.29436	0.0284609	0.630396	-3.94594
LMAN1	-0.203135	8.01283	-2.2943	0.0284647	0.630396	-3.94606
LOC100129622	-0.158221	7.13592	-2.29379	0.0284972	0.630671	-3.94705
LOC727836	-0.158799	6.86308	-2.2927	0.0285674	0.631781	-3.9492
ZSCAN21	0.161994	7.6259	2.29215	0.0286031	0.632124	-3.95029
SDC2	-0.164073	9.40121	-2.29078	0.0286916	0.633318	-3.95298
LOC649184	-0.181592	6.92851	-2.29006	0.028738	0.633318	-3.95439
LOC652846	-0.152745	6.96349	-2.28982	0.0287532	0.633318	-3.95485
C14orf119	-0.148148	6.89403	-2.28982	0.0287533	0.633318	-3.95486
TAX1BP3	-0.157632	9.42004	-2.28975	0.0287579	0.633318	-3.955
MAD2L1BP	0.15656	10.1179	2.28918	0.0287949	0.633688	-3.95612
UNC84B	-0.16874	11.7113	-2.28783	0.0288825	0.634967	-3.95877
MIR589	-0.168526	6.84546	-2.28766	0.0288933	0.634967	-3.9591
NKAIN4	0.158572	6.76617	2.28653	0.0289673	0.636147	-3.96133
LOC730746	0.390528	8.06711	2.28607	0.0289973	0.63636	-3.96223
TMED7	-0.138078	9.53104	-2.28531	0.0290468	0.637003	-3.96372
LOC647135	-0.148584	7.10151	-2.28478	0.0290811	0.637311	-3.96475
C7orf26	0.188511	9.30055	2.28315	0.0291881	0.639209	-3.96795
LOC644348	0.158148	6.90892	2.28165	0.0292867	0.640792	-3.97089
HIAT1	-0.161438	8.63093	-2.28125	0.0293129	0.640792	-3.97166
OTUD1	0.169411	7.48366	2.28088	0.0293376	0.640792	-3.9724
ARHGEF6	-0.149201	11.3303	-2.28064	0.0293532	0.640792	-3.97286
TSPAN18	-0.166582	6.98279	-2.2805	0.0293623	0.640792	-3.97313
RENBP	-0.142198	7.50977	-2.27925	0.0294452	0.642154	-3.97559
FAM9B	-0.151113	6.9225	-2.27828	0.0295095	0.64311	-3.97749
LOC643132	0.137961	6.89876	2.27767	0.0295497	0.643486	-3.97868
H2AFB1	0.142406	6.98314	2.27715	0.0295839	0.643486	-3.97969
PPIAL4G	-0.159873	6.84857	-2.27677	0.0296092	0.643486	-3.98043
GIN1	-0.135166	7.31674	-2.27662	0.0296196	0.643486	-3.98074
LOC100130263	0.228885	8.04084	2.27623	0.0296455	0.643486	-3.9815
RGS18	-0.162948	9.54766	-2.27617	0.0296496	0.643486	-3.98162
C15orf29	0.172008	7.24916	2.2745	0.0297606	0.645057	-3.98487
CAMK2N2	0.13977	6.74525	2.27423	0.0297783	0.645057	-3.98539
PFKFB3	0.145309	9.76176	2.27346	0.0298298	0.645057	-3.9869
OR8G1	-0.180877	6.92931	-2.27335	0.0298378	0.645057	-3.98713
FCRL4	0.158719	6.84656	2.27304	0.0298584	0.645057	-3.98773
MPV17L2	-0.193057	7.74797	-2.27292	0.0298663	0.645057	-3.98796
IPO7	-0.145244	7.69003	-2.27282	0.0298727	0.645057	-3.98815
TSSC4	0.222689	9.88124	2.27262	0.0298864	0.645057	-3.98855
LOC400455	-0.181842	10.7201	-2.27232	0.0299067	0.645057	-3.98914
LOC391771	-0.164463	6.89411	-2.27056	0.0300249	0.646819	-3.99257
TTC29	-0.142459	6.88394	-2.27038	0.0300372	0.646819	-3.99293
LOC100132442	0.146407	6.90954	2.27018	0.0300501	0.646819	-3.99331
LOC642785	0.179603	6.85828	2.26919	0.0301172	0.64737	-3.99525
MAP6D1	-0.178211	7.97543	-2.26897	0.0301317	0.64737	-3.99567
LOC652722	0.178513	6.93224	2.26867	0.0301523	0.64737	-3.99626
LOC653280	-0.214489	6.88847	-2.26849	0.0301643	0.64737	-3.99661
LOC643912	0.223773	7.16825	2.26828	0.0301788	0.64737	-3.99702
TXNL1	0.349734	8.88414	2.26599	0.0303338	0.650252	-4.00148
H3F3A	-0.174353	14.4105	-2.26541	0.0303732	0.650312	-4.00261
LOC645218	-0.135425	7.04058	-2.26523	0.0303853	0.650312	-4.00296
STAU1	-0.121286	10.782	-2.2648	0.0304148	0.650312	-4.0038
LOC100130065	-0.153296	6.83107	-2.26442	0.0304403	0.650312	-4.00454
TCL6	0.166802	7.14276	2.26385	0.0304797	0.650312	-4.00566
TMC8	-0.210054	7.2442	-2.26375	0.030486	0.650312	-4.00584
KLHL33	0.193814	7.28904	2.26373	0.0304875	0.650312	-4.00588
AGRN	-0.205252	7.70068	-2.26338	0.0305118	0.650312	-4.00658
LRGUK	0.146309	6.93739	2.26303	0.0305354	0.650312	-4.00725
SCARNA14	-0.188902	7.29901	-2.26282	0.03055	0.650312	-4.00767
CCDC35	-0.147094	7.03825	-2.26261	0.0305642	0.650312	-4.00807
LOC728324	0.190618	11.1097	2.26165	0.0306297	0.651255	-4.00993
LOC144817	-0.14503	6.93234	-2.26092	0.0306798	0.651255	-4.01135
MIR639	0.182068	7.05228	2.26085	0.0306849	0.651255	-4.0115
FGGY	-0.183829	7.8911	-2.26068	0.0306961	0.651255	-4.01182
LOC646507	-0.175038	6.88985	-2.26045	0.0307121	0.651255	-4.01227
RNF157	-0.114953	6.89318	-2.25944	0.0307816	0.651417	-4.01424
NUDT10	0.147273	6.90972	2.25907	0.0308074	0.651417	-4.01497
SYNJ1	0.14465	7.97776	2.25865	0.0308358	0.651417	-4.01577
MYH7B	0.164789	6.86737	2.25835	0.0308565	0.651417	-4.01635
C19orf57	-0.170263	7.0923	-2.25828	0.0308616	0.651417	-4.01649
LOC401152	-0.20672	8.1674	-2.25828	0.0308617	0.651417	-4.0165
RBM26	0.197482	8.83083	2.25823	0.0308649	0.651417	-4.01659
LOC100128086	-0.146628	9.125	-2.2578	0.030895	0.651449	-4.01743
FLJ38973	0.196705	7.3198	2.25658	0.0309787	0.651449	-4.01979
LPCAT2	-0.127243	8.15139	-2.25633	0.0309965	0.651449	-4.02029
WIPF2	-0.178059	7.07938	-2.25632	0.030997	0.651449	-4.0203
TMEM184B	-0.135846	7.49277	-2.25628	0.0309996	0.651449	-4.02037
LOC643262	-0.128158	6.91929	-2.25591	0.0310254	0.651449	-4.0211
CFHR2	0.164159	7.15041	2.25586	0.0310289	0.651449	-4.0212
TMEM213	0.132803	6.92433	2.25434	0.0311346	0.651449	-4.02415
MXRA7	-0.168888	7.39133	-2.25393	0.0311631	0.651449	-4.02495
LOC100132107	0.150806	6.95115	2.25393	0.0311633	0.651449	-4.02495
LRRC37A2	0.171283	6.93197	2.25344	0.031197	0.651449	-4.02589
ETS2	0.158869	8.38617	2.25331	0.0312062	0.651449	-4.02615
SDK1	0.141316	7.0012	2.25306	0.0312239	0.651449	-4.02664
ARMC5	0.187105	7.96805	2.25281	0.0312411	0.651449	-4.02712
IRAK3	0.150986	9.57157	2.25262	0.0312541	0.651449	-4.02748
RFPL2	0.152425	6.87954	2.25246	0.0312657	0.651449	-4.02781
LOC645687	-0.136086	6.94825	-2.25242	0.0312684	0.651449	-4.02788
SNORA76	-0.178437	7.85015	-2.25219	0.0312841	0.651449	-4.02832
LOC400590	-0.180661	7.02554	-2.25121	0.0313526	0.651449	-4.03022
TRMT61A	0.161889	8.29129	2.25091	0.0313739	0.651449	-4.03081
HSPC157	-0.129695	7.6504	-2.25088	0.0313755	0.651449	-4.03086
LOC649500	-0.154806	6.99581	-2.25079	0.0313822	0.651449	-4.03104
POLR3B	-0.133389	9.22473	-2.25036	0.031412	0.651449	-4.03186
MMD2	-0.131518	6.7239	-2.25031	0.0314162	0.651449	-4.03198
MIR620	0.15678	6.86127	2.25004	0.0314349	0.651449	-4.0325
CCRL2	-0.149225	7.10431	-2.24984	0.031449	0.651449	-4.03289
MRPS26	0.170308	11.0578	2.24944	0.0314772	0.651449	-4.03367
CNO	0.156127	9.57819	2.24929	0.0314872	0.651449	-4.03394
LOC652629	0.138838	6.93786	2.24926	0.0314895	0.651449	-4.03401
LOC730385	-0.153514	6.99136	-2.24909	0.0315017	0.651449	-4.03434
SPHKAP	-0.152988	6.77267	-2.24898	0.031509	0.651449	-4.03455
DACH1	0.180027	11.0649	2.24809	0.0315718	0.65221	-4.03628
LOC100133551	0.148609	6.85993	2.24787	0.0315873	0.65221	-4.0367
PRRG4	-0.258637	8.29241	-2.2471	0.0316417	0.652686	-4.0382
CLDN6	0.155439	6.73304	2.24663	0.0316746	0.652686	-4.0391
FLJ44216	0.134329	7.04309	2.24597	0.0317214	0.652686	-4.04038
PRKACG	-0.148382	6.83318	-2.24577	0.0317357	0.652686	-4.04077
LOC100128819	-0.12463	6.82733	-2.2442	0.031847	0.652686	-4.04382
DENND1A	-0.19903	8.77759	-2.24419	0.0318477	0.652686	-4.04384
PLA2G4B	-0.154228	7.60362	-2.24403	0.0318592	0.652686	-4.04415
SLC35A3	-0.173395	8.76888	-2.244	0.0318609	0.652686	-4.04419
HSZFP36	-0.161698	8.29632	-2.24396	0.0318638	0.652686	-4.04427
MTRR	-0.156453	10.2887	-2.24367	0.0318842	0.652686	-4.04483
LOC139735	0.158874	6.92178	2.24351	0.0318955	0.652686	-4.04514
TMEM59	-0.148459	11.4006	-2.24339	0.0319039	0.652686	-4.04537
VIPR2	-0.130465	6.94395	-2.24311	0.0319241	0.652686	-4.04591
LOC643901	0.154658	6.97197	2.24278	0.0319479	0.652686	-4.04656
FLJ20297	0.154298	6.98523	2.24275	0.0319495	0.652686	-4.04661
SOSTDC1	0.139252	6.91014	2.24269	0.0319538	0.652686	-4.04672
WDR43	0.165333	8.8463	2.24195	0.0320067	0.652686	-4.04816
LOC730152	0.162938	6.86667	2.24187	0.0320128	0.652686	-4.04832
SNAI3	-0.160734	7.4103	-2.24186	0.0320131	0.652686	-4.04833
MRGPRE	-0.165576	7.0027	-2.24162	0.0320306	0.652686	-4.04881
LOC652640	0.14016	6.99685	2.24083	0.0320864	0.652686	-4.05032
FLJ20718	0.167272	9.25192	2.24076	0.032092	0.652686	-4.05047
LOC100131289	-0.149732	7.04543	-2.24014	0.0321362	0.652686	-4.05167
HAS2	0.128429	7.03027	2.23997	0.0321479	0.652686	-4.05198
COPS7A	-0.163952	10.9465	-2.23945	0.0321851	0.652686	-4.05299
C2orf47	0.144921	10.466	2.23935	0.0321925	0.652686	-4.05319
MTPAP	-0.156907	6.9906	-2.23926	0.0321989	0.652686	-4.05336
ASB13	-0.17539	8.05923	-2.23906	0.0322132	0.652686	-4.05374
LOC641849	0.328988	8.70387	2.23834	0.0322648	0.652686	-4.05513
PIGT	-0.144084	9.70466	-2.23834	0.032265	0.652686	-4.05514
C19orf10	-0.202219	11.9609	-2.23811	0.0322813	0.652686	-4.05558
LOC100128340	0.155824	6.9496	2.23733	0.0323378	0.652686	-4.0571
APH1B	-0.1287	8.75409	-2.23723	0.0323447	0.652686	-4.05728
FZD2	-0.169718	8.07956	-2.23684	0.032373	0.652686	-4.05804
LOC100131426	0.185436	7.10437	2.23664	0.0323871	0.652686	-4.05842
LOC653889	0.136612	6.93696	2.23649	0.0323981	0.652686	-4.05871
TTK	-0.177504	10.3057	-2.23617	0.032421	0.652686	-4.05933
LOC647389	0.200952	7.35775	2.23607	0.0324286	0.652686	-4.05953
PSORS1C1	-0.144054	7.0255	-2.23584	0.0324454	0.652686	-4.05998
LOC654264	0.153559	6.94541	2.23555	0.0324657	0.652686	-4.06052
LOC643821	-0.133721	6.88952	-2.23486	0.0325162	0.652686	-4.06187
RBM25	-0.147249	10.5366	-2.23467	0.0325296	0.652686	-4.06223
CENPI	-0.139105	7.5073	-2.23462	0.0325333	0.652686	-4.06233
CREB3L2	-0.166906	8.91573	-2.23413	0.0325689	0.652686	-4.06328
LOC100128548	0.131703	7.02028	2.23411	0.0325703	0.652686	-4.06331
LOC126520	-0.137302	7.15188	-2.23389	0.0325862	0.652686	-4.06374
PSAT1	-0.189518	11.1866	-2.23388	0.0325865	0.652686	-4.06375
PHF8	0.194802	7.12637	2.23357	0.0326089	0.652718	-4.06434
LOC100130906	0.161071	7.18286	2.23135	0.0327705	0.655165	-4.06863
C1orf163	0.203554	8.72791	2.23118	0.0327831	0.655165	-4.06896
AMY2A	0.354389	9.04776	2.23084	0.0328075	0.655165	-4.06961
KC6	-0.140191	6.9473	-2.23059	0.0328255	0.655165	-4.07009
LOC649978	-0.166439	6.9623	-2.23046	0.0328354	0.655165	-4.07035
TRQ1	0.155658	7.28881	2.22939	0.0329133	0.655988	-4.0724
ALDH3B2	-0.174617	6.986	-2.22879	0.032957	0.655988	-4.07356
C10orf113	0.14793	6.77593	2.22835	0.0329894	0.655988	-4.07441
FCGR3B	-0.191107	7.51946	-2.22797	0.0330172	0.655988	-4.07514
LOC440352	-0.128036	6.9574	-2.22787	0.0330244	0.655988	-4.07533
XDH	-0.137607	6.91575	-2.22784	0.0330271	0.655988	-4.0754
CYBRD1	-0.180943	7.91787	-2.2274	0.0330591	0.655988	-4.07624
LOC151162	-0.169197	9.00289	-2.22696	0.0330912	0.655988	-4.07708
TMEM43	-0.126565	10.4854	-2.22683	0.0331013	0.655988	-4.07735
ST7OT1	-0.173844	6.98071	-2.22656	0.0331211	0.655988	-4.07786
SPRED2	0.160728	7.71861	2.22653	0.0331228	0.655988	-4.07791
ORAOV1	0.217692	8.21314	2.22637	0.0331346	0.655988	-4.07822
TADA2B	-0.146664	7.91718	-2.22593	0.0331673	0.655988	-4.07907
LOC100134000	-0.236823	6.99042	-2.22591	0.0331689	0.655988	-4.07911
LOC728591	0.160557	7.31272	2.22522	0.0332193	0.656573	-4.08043
EXTL2	-0.16775	8.33562	-2.22486	0.0332464	0.656594	-4.08114
FAM122B	-0.151061	8.51015	-2.22464	0.0332622	0.656594	-4.08155
TSPAN4	-0.145091	7.96832	-2.22264	0.0334099	0.658481	-4.08539
MIR1179	0.133199	6.86995	2.22245	0.033424	0.658481	-4.08576
LMNB2	-0.163791	10.7532	-2.22221	0.0334417	0.658481	-4.08622
NBPF4	0.159919	6.85478	2.22146	0.0334973	0.658481	-4.08766
LOC642902	0.154733	6.88277	2.22131	0.033509	0.658481	-4.08796
LYSMD1	0.153239	7.06236	2.22123	0.0335148	0.658481	-4.08811
TRIM9	-0.160999	8.62275	-2.22054	0.0335662	0.658481	-4.08944
LBR	-0.218249	9.22486	-2.22029	0.033585	0.658481	-4.08992
FECH	-0.166303	8.13104	-2.22024	0.0335881	0.658481	-4.09
STK38	-0.144452	8.54929	-2.22017	0.0335933	0.658481	-4.09014
SH3PXD2A	-0.152717	6.85251	-2.21987	0.0336158	0.658481	-4.09072
GCNT2	0.141477	7.13144	2.21972	0.0336268	0.658481	-4.091
FCHO1	-0.149453	7.17725	-2.21942	0.0336495	0.658481	-4.09159
LOC441737	0.133929	6.85626	2.2194	0.0336511	0.658481	-4.09163
SFT2D1	-0.125371	12.7082	-2.21653	0.0338659	0.661716	-4.09714
FLJ37201	-0.194242	6.93501	-2.21644	0.0338725	0.661716	-4.09731
C9orf14	-0.123836	6.89368	-2.2163	0.033883	0.661716	-4.09758
SEMA3E	0.240615	7.91695	2.21606	0.0339007	0.661716	-4.09803
ASF1B	-0.223886	9.6752	-2.21501	0.0339797	0.662343	-4.10005
AK1	-0.148422	7.45808	-2.21496	0.0339832	0.662343	-4.10014
PACS1	0.163948	7.06989	2.21457	0.034013	0.662343	-4.1009
RCOR1	-0.149107	6.83181	-2.21451	0.0340171	0.662343	-4.101
BAGE5	0.170283	7.05366	2.21421	0.0340397	0.662372	-4.10157
LOC100132426	0.151127	6.83428	2.21393	0.0340608	0.662374	-4.10211
MGC34800	0.134983	6.9226	2.21359	0.0340866	0.662465	-4.10277
AADACL1	-0.142712	8.46049	-2.21271	0.0341528	0.66265	-4.10445
TRK1	0.185554	8.01773	2.21268	0.0341556	0.66265	-4.10452
DLG3	-0.131291	6.92366	-2.21246	0.0341717	0.66265	-4.10493
PPYR1	-0.134333	6.7483	-2.21235	0.0341805	0.66265	-4.10515
LOC651850	0.15222	6.97344	2.21102	0.0342807	0.663526	-4.10768
PPFIA4	-0.149175	6.97727	-2.21098	0.0342841	0.663526	-4.10777
GOSR1	-0.152236	7.47056	-2.21091	0.034289	0.663526	-4.1079
PAPSS1	-0.182201	10.2018	-2.20968	0.0343827	0.664929	-4.11026
LOC400942	0.150007	6.84999	2.20921	0.0344181	0.664979	-4.11115
DSCR4	-0.174269	7.06359	-2.20909	0.0344276	0.664979	-4.11139
CCDC126	-0.162764	7.28148	-2.20854	0.0344694	0.665378	-4.11244
MUC5AC	-0.133968	7.04872	-2.20713	0.0345771	0.666513	-4.11514
MTHFR	-0.1331	7.02889	-2.20705	0.0345831	0.666513	-4.11529
FLJ12334	-0.170921	6.9404	-2.20657	0.0346199	0.666513	-4.11621
LOC100128913	0.138094	6.83874	2.20647	0.0346277	0.666513	-4.11641
FBXO15	-0.195707	8.30456	-2.20638	0.0346343	0.666513	-4.11657
CNTNAP3	-0.152393	7.03401	-2.2057	0.0346867	0.667114	-4.11788
CPSF3	-0.129933	11.5166	-2.20522	0.0347235	0.667414	-4.1188
ADCK2	-0.130126	8.19376	-2.20473	0.034761	0.667541	-4.11973
RORB	0.146379	6.76167	2.20458	0.0347726	0.667541	-4.12002
WEE1	-0.147845	8.86727	-2.20396	0.0348198	0.667631	-4.12119
GRLF1	-0.171577	7.09072	-2.2037	0.0348398	0.667631	-4.12169
LOC645691	0.360475	11.1976	2.20332	0.0348693	0.667631	-4.12242
FLJ35379	-0.123978	6.90385	-2.20328	0.0348723	0.667631	-4.1225
OR4F3	-0.141815	6.86894	-2.20275	0.0349127	0.667631	-4.1235
NUPR1	-0.186529	7.11311	-2.20257	0.0349271	0.667631	-4.12385
PCDHB16	0.158259	7.01494	2.20216	0.0349583	0.667631	-4.12463
LOC100130176	-0.157605	6.85773	-2.20168	0.0349952	0.667631	-4.12554
LOC441811	0.169637	6.97359	2.20136	0.0350206	0.667631	-4.12617
LOC653115	0.150395	7.15993	2.20104	0.0350452	0.667631	-4.12678
PTPN9	-0.143602	7.27972	-2.20084	0.0350608	0.667631	-4.12716
RDH13	0.130852	8.8076	2.20054	0.0350834	0.667631	-4.12772
LOC115648	0.145781	6.95287	2.20018	0.0351112	0.667631	-4.12841
TBC1D14	-0.163149	8.94436	-2.20003	0.0351229	0.667631	-4.12869
MCOLN1	-0.148155	7.88576	-2.19983	0.0351384	0.667631	-4.12907
CHRNA6	0.177282	6.98597	2.19977	0.0351431	0.667631	-4.12919
LOC642591	-0.132246	6.92579	-2.19954	0.0351614	0.667631	-4.12964
LOC729764	-0.177462	7.31691	-2.19952	0.035163	0.667631	-4.12968
M6PR	-0.153917	10.8968	-2.1992	0.0351872	0.667631	-4.13027
BCAT2	-0.185041	9.02776	-2.19864	0.035231	0.667631	-4.13135
SLC6A6	-0.151961	7.05447	-2.19853	0.0352396	0.667631	-4.13156
DCTN4	0.20922	8.73985	2.19825	0.0352617	0.667631	-4.1321
LOC100132973	-0.154488	7.08691	-2.19789	0.0352891	0.667631	-4.13277
FXN	-0.13128	7.10997	-2.19736	0.0353305	0.667631	-4.13379
LOC731895	0.148086	7.0165	2.19707	0.0353532	0.667631	-4.13434
C4orf35	0.144161	6.97506	2.19706	0.0353539	0.667631	-4.13436
DPH2	0.156692	10.8686	2.19691	0.0353658	0.667631	-4.13465
LOC344405	-0.126194	6.96802	-2.19639	0.035406	0.667631	-4.13564
TGIF1	0.188717	9.02758	2.19629	0.0354137	0.667631	-4.13582
LOC100133975	0.150477	6.88023	2.19628	0.0354146	0.667631	-4.13585
ABO	0.126848	6.78893	2.19515	0.0355029	0.668044	-4.138
CENTA1	0.149883	11.4937	2.19511	0.0355065	0.668044	-4.13809
LOC644433	0.15711	6.98944	2.19495	0.0355187	0.668044	-4.13838
ZNF593	0.198424	11.4616	2.1947	0.0355383	0.668044	-4.13886
MIR379	-0.132059	6.81117	-2.19455	0.0355498	0.668044	-4.13914
LOC100131970	-0.172905	7.4922	-2.19399	0.0355936	0.668044	-4.14021
LOC643278	0.234602	6.90701	2.19373	0.035614	0.668044	-4.1407
LOC651668	0.142199	6.84088	2.1936	0.0356247	0.668044	-4.14096
FAM118B	-0.16126	7.45001	-2.19356	0.0356279	0.668044	-4.14104
CRY2	0.128945	8.14696	2.19251	0.0357105	0.668597	-4.14304
CLN8	-0.173122	7.60045	-2.1925	0.0357108	0.668597	-4.14305
LOC100133931	-0.129608	14.897	-2.19237	0.0357212	0.668597	-4.1433
LOC100130133	-0.201094	7.17677	-2.19146	0.035793	0.668868	-4.14503
CCDC25	-0.144018	10.6546	-2.19126	0.0358086	0.668868	-4.14541
RPRD1A	-0.1454	8.92296	-2.19119	0.0358138	0.668868	-4.14554
LOC100130850	0.162576	6.87847	2.1911	0.0358208	0.668868	-4.14571
LOC643242	0.125442	6.87597	2.19032	0.0358824	0.669321	-4.14719
LMBRD1	-0.150143	10.8843	-2.19007	0.0359021	0.669321	-4.14766
TMEM69	0.189171	10.605	2.18999	0.035909	0.669321	-4.14783
MSRB3	0.164467	7.2472	2.18911	0.0359782	0.669792	-4.14949
ART3	-0.140429	6.90813	-2.18898	0.0359889	0.669792	-4.14975
LOC441326	0.140858	6.95445	2.18886	0.0359982	0.669792	-4.14997
PDIA2	0.125984	6.77944	2.18749	0.0361067	0.671414	-4.15257
GRB2	-0.227921	9.91104	-2.18694	0.0361504	0.67149	-4.15362
LOC730411	-0.145356	6.85134	-2.18666	0.036173	0.67149	-4.15416
LOC153561	-0.119485	7.28138	-2.18649	0.0361865	0.67149	-4.15448
FAM175B	0.129401	9.99322	2.18636	0.0361966	0.67149	-4.15472
CNTD2	-0.126741	6.85095	-2.18603	0.0362227	0.67149	-4.15535
NCBP1	-0.129204	10.5814	-2.18533	0.0362785	0.67149	-4.15667
NECAP1	0.149281	8.64768	2.18527	0.0362833	0.67149	-4.15679
RB1CC1	-0.16184	9.80037	-2.185	0.0363048	0.67149	-4.1573
LOC286177	-0.141128	6.8761	-2.18466	0.0363323	0.67149	-4.15796
LOC642726	-0.137195	7.2062	-2.18433	0.0363581	0.67149	-4.15857
LOC642656	0.135072	6.84586	2.18408	0.0363788	0.67149	-4.15906
PMCHL2	-0.140141	6.95893	-2.18401	0.0363837	0.67149	-4.15918
TM2D2	-0.180262	7.86971	-2.18395	0.0363886	0.67149	-4.15929
RASA1	-0.145247	9.19403	-2.18345	0.0364284	0.671831	-4.16024
FIS1	-0.179463	10.7941	-2.18296	0.0364678	0.672163	-4.16117
TEF	-0.199405	7.19036	-2.1824	0.0365132	0.672595	-4.16224
RIN1	-0.188987	7.7001	-2.18214	0.0365341	0.672595	-4.16274
H2AFJ	0.150143	10.4004	2.18127	0.0366033	0.673018	-4.16437
PDZD7	-0.141786	7.1846	-2.18119	0.0366099	0.673018	-4.16453
SNORA11B	-0.201096	7.00553	-2.18105	0.0366213	0.673018	-4.1648
C1orf109	0.144789	8.73444	2.18075	0.0366451	0.673062	-4.16536
EDG4	-0.12861	8.46787	-2.17977	0.0367248	0.673367	-4.16723
TMBIM6	-0.152855	12.3804	-2.17964	0.0367347	0.673367	-4.16747
ABCE1	-0.161557	10.4009	-2.17963	0.0367361	0.673367	-4.1675
LOC650744	-0.145096	6.89024	-2.17934	0.0367594	0.673367	-4.16805
MGC87042	-0.170242	7.4641	-2.17922	0.0367688	0.673367	-4.16827
CLEC2L	0.18386	7.06324	2.17765	0.0368958	0.675285	-4.17124
KRT1	-0.128296	6.79414	-2.17739	0.0369165	0.675285	-4.17173
LOC100133049	0.16264	6.93336	2.17615	0.037017	0.67639	-4.17407
POLR2E	-0.206664	7.48151	-2.17612	0.03702	0.67639	-4.17415
KIAA0319	0.140818	6.77493	2.1741	0.0371843	0.678515	-4.17797
P2RY8	-0.147603	10.8048	-2.17356	0.0372277	0.678515	-4.17897
LOC283267	-0.184128	7.69255	-2.17335	0.0372452	0.678515	-4.17938
LOC729189	-0.158159	6.86334	-2.17332	0.0372474	0.678515	-4.17943
SNORA33	0.209989	7.85952	2.17289	0.0372825	0.678515	-4.18024
MARCH9	0.179185	7.03208	2.17287	0.0372841	0.678515	-4.18028
LUZP5	-0.154546	6.85869	-2.17283	0.0372874	0.678515	-4.18036
SLC35F1	-0.185563	7.67334	-2.17142	0.037403	0.680223	-4.18302
LOC651562	0.121799	6.90974	2.17073	0.0374597	0.680861	-4.18433
LOC286157	-0.149142	10.4542	-2.17039	0.037488	0.680981	-4.18498
LOC652874	0.116963	6.87437	2.16889	0.0376106	0.682741	-4.1878
DLG2	0.176993	6.97857	2.16868	0.0376283	0.682741	-4.18821
KIAA1274	-0.22824	7.41857	-2.16721	0.0377493	0.68454	-4.19097
LOC100128823	-0.154256	6.98134	-2.16594	0.0378544	0.685247	-4.19337
LACTB	-0.146677	10.1328	-2.1658	0.0378666	0.685247	-4.19365
ENO2	-0.131871	6.82566	-2.16509	0.0379252	0.685247	-4.19498
DDX3Y	0.158737	6.98591	2.16491	0.0379399	0.685247	-4.19532
LOC651158	0.142025	6.92331	2.16466	0.0379609	0.685247	-4.19579
UBE2Q1	-0.17258	8.60882	-2.16422	0.0379974	0.685247	-4.19662
PMP22	-0.163768	8.95776	-2.16386	0.0380273	0.685247	-4.1973
TP53AP1	-0.152492	7.23991	-2.16331	0.0380726	0.685247	-4.19833
ACO2	-0.184379	9.11782	-2.16292	0.0381054	0.685247	-4.19907
LCMT2	0.194489	8.9893	2.16282	0.0381133	0.685247	-4.19925
GPR32	0.150502	6.90816	2.16277	0.0381181	0.685247	-4.19935
ERCC-00034	0.128951	6.80187	2.16254	0.0381369	0.685247	-4.19978
GCET2	-0.180804	7.38676	-2.16186	0.0381938	0.685247	-4.20106
NALP5	0.167935	6.94338	2.16169	0.0382082	0.685247	-4.20139
HYDIN	-0.15856	7.42335	-2.16166	0.0382108	0.685247	-4.20145
KLRC4	-0.132833	6.88381	-2.16162	0.0382136	0.685247	-4.20151
C3orf10	-0.181338	10.492	-2.16122	0.0382473	0.685247	-4.20227
MAGEE1	-0.140985	7.05563	-2.16098	0.0382677	0.685247	-4.20273
IER5	0.191879	8.83671	2.16076	0.0382853	0.685247	-4.20313
LOC100133790	0.135406	6.87115	2.1606	0.0382994	0.685247	-4.20345
LOC100129827	-0.129846	6.92955	-2.16045	0.0383118	0.685247	-4.20372
PLTP	-0.190135	8.09027	-2.15979	0.0383669	0.685247	-4.20496
ZNF75D	-0.149372	7.94253	-2.15956	0.0383863	0.685247	-4.2054
C20orf166	0.157652	6.82461	2.15902	0.0384318	0.685247	-4.20642
AK3L1	-0.133649	9.12243	-2.15801	0.0385164	0.685247	-4.20831
TUBE1	0.203985	7.62417	2.15781	0.0385334	0.685247	-4.20869
PLA2G4D	0.134341	6.97336	2.1573	0.0385764	0.685247	-4.20965
ANKRD1	0.154809	6.9532	2.15697	0.0386043	0.685247	-4.21028
LOC100128202	-0.163489	7.09559	-2.15686	0.0386129	0.685247	-4.21047
RNF165	-0.175174	7.00431	-2.15668	0.0386285	0.685247	-4.21082
USP31	-0.133835	6.95016	-2.15663	0.0386325	0.685247	-4.21091
CACNA2D3	-0.171938	8.08321	-2.15658	0.0386373	0.685247	-4.21101
C10orf54	-0.21242	7.92061	-2.15644	0.0386486	0.685247	-4.21126
AOF2	-0.129729	10.118	-2.15638	0.0386541	0.685247	-4.21139
FUT4	0.136242	10.6083	2.15627	0.0386629	0.685247	-4.21158
HPR	0.141816	7.0841	2.15602	0.0386843	0.685247	-4.21206
LOC442381	0.128002	6.88702	2.15599	0.0386867	0.685247	-4.21211
INTS5	0.134717	8.44267	2.15496	0.0387736	0.685247	-4.21404
MAFB	0.16781	7.10555	2.15458	0.0388061	0.685247	-4.21477
MAPRE2	-0.207867	9.38823	-2.15444	0.0388181	0.685247	-4.21503
MCOLN2	-0.195906	9.35976	-2.15432	0.0388278	0.685247	-4.21525
SLCO1A2	-0.129854	7.03402	-2.15408	0.0388482	0.685247	-4.2157
LOC642351	-0.13281	6.93471	-2.1538	0.0388724	0.685247	-4.21624
ZNF416	0.154285	7.39463	2.15375	0.038876	0.685247	-4.21632
STMN1	-0.155215	10.9188	-2.15364	0.0388851	0.685247	-4.21652
MIR31	0.172561	6.81288	2.15323	0.0389205	0.685247	-4.2173
C9orf127	-0.123585	7.00642	-2.15319	0.0389237	0.685247	-4.21737
LOC653801	0.145592	6.92111	2.15299	0.0389406	0.685247	-4.21775
TBC1D5	-0.122171	7.15067	-2.15293	0.0389458	0.685247	-4.21786
NECAB3	-0.120879	7.03457	-2.15285	0.0389529	0.685247	-4.21802
SRP54	-0.138888	10.8863	-2.15261	0.0389727	0.685247	-4.21845
GPR132	0.146611	7.41732	2.15244	0.0389873	0.685247	-4.21878
MAPKSP1	-0.146346	7.32314	-2.1524	0.0389907	0.685247	-4.21885
FLJ42562	0.139758	6.9827	2.15218	0.0390098	0.685247	-4.21927
ANKH	0.127486	6.912	2.15207	0.039019	0.685247	-4.21948
ZNF519	-0.16838	7.43845	-2.15196	0.0390286	0.685247	-4.21969
LOC651476	-0.147378	6.87275	-2.15193	0.0390311	0.685247	-4.21974
DEFB127	0.133656	6.96669	2.15141	0.0390751	0.685394	-4.22071
LRRC37A3	-0.156886	6.9501	-2.15132	0.0390831	0.685394	-4.22089
LOC133185	-0.171909	6.98492	-2.15082	0.0391257	0.685757	-4.22183
GBX1	0.131848	6.94751	2.15014	0.0391831	0.686062	-4.22309
P2RY11	0.218644	9.0026	2.1501	0.0391867	0.686062	-4.22317
LOC196120	-0.130722	6.94908	-2.14984	0.0392088	0.686067	-4.22365
RPL36A	-0.166541	9.98075	-2.14958	0.0392315	0.686082	-4.22415
CXorf36	-0.168765	7.25136	-2.14885	0.039294	0.68621	-4.22552
ZZEF1	-0.128311	8.41938	-2.14866	0.0393099	0.68621	-4.22587
MAN2B1	-0.160451	8.39498	-2.1486	0.0393148	0.68621	-4.22598
LOC730024	-0.124822	6.99706	-2.14839	0.0393335	0.68621	-4.22639
C10orf141	-0.125828	6.90212	-2.14822	0.039348	0.68621	-4.2267
LOC643327	0.140818	6.927	2.14775	0.0393884	0.686534	-4.22759
ZNF561	0.151736	7.33271	2.147	0.0394521	0.686739	-4.22898
KCNV2	-0.141625	6.99021	-2.14692	0.0394591	0.686739	-4.22913
NT5C1B	0.160418	6.92598	2.14685	0.0394657	0.686739	-4.22928
SYVN1	-0.183775	9.5327	-2.14642	0.0395019	0.686988	-4.23006
LOC100132159	0.162292	6.99206	2.14588	0.0395488	0.68711	-4.23108
PDAP1	-0.177935	7.18891	-2.14584	0.0395527	0.68711	-4.23117
LOC644048	0.134848	6.8886	2.14557	0.0395758	0.687133	-4.23167
LOC644422	-0.165588	9.74745	-2.14457	0.0396619	0.687262	-4.23354
GPX3	-0.124736	6.95717	-2.14425	0.0396892	0.687262	-4.23413
LOC401354	0.121788	6.97422	2.14416	0.0396968	0.687262	-4.2343
C1orf212	0.178317	8.07331	2.14386	0.0397232	0.687262	-4.23487
TSPAN1	-0.170517	7.10337	-2.14376	0.0397319	0.687262	-4.23506
ZEB1	-0.135535	6.73572	-2.1436	0.0397452	0.687262	-4.23535
ACVR1C	0.142269	6.94987	2.14347	0.0397568	0.687262	-4.2356
LOC642220	0.174913	6.953	2.14303	0.0397951	0.687262	-4.23643
LRRK1	0.158271	7.49881	2.14246	0.0398439	0.687262	-4.23748
OAZ3	0.140886	7.08158	2.14246	0.039844	0.687262	-4.23748
MON2	-0.167751	8.2234	-2.1424	0.0398497	0.687262	-4.2376
LOC650278	0.201901	6.87928	2.14217	0.0398698	0.687262	-4.23804
LOC390933	0.129572	7.09721	2.14201	0.0398829	0.687262	-4.23832
ALAS1	0.185131	7.91031	2.14118	0.0399554	0.687262	-4.23988
LOC651427	-0.141742	6.99001	-2.14107	0.0399653	0.687262	-4.2401
CCDC67	0.16074	6.79155	2.14093	0.0399769	0.687262	-4.24035
SLC46A3	-0.18758	8.1608	-2.14006	0.0400525	0.687262	-4.24197
LOC100131608	-0.149738	7.59171	-2.13997	0.0400609	0.687262	-4.24215
SLC41A3	-0.144083	9.4619	-2.13984	0.040072	0.687262	-4.24239
KLHL36	0.141759	8.73771	2.13913	0.0401335	0.687262	-4.24371
S100PBP	-0.140174	8.64836	-2.13897	0.0401475	0.687262	-4.24401
OR7G2	-0.162738	7.00372	-2.13894	0.0401505	0.687262	-4.24407
COQ2	-0.111142	11.2895	-2.13872	0.0401698	0.687262	-4.24449
SETD3	-0.138708	10.7282	-2.13869	0.040172	0.687262	-4.24453
MAST4	0.140086	6.84156	2.13865	0.0401757	0.687262	-4.24461
ENOPH1	-0.152869	10.4987	-2.13817	0.0402177	0.687262	-4.24551
SNHG3-RCC1	-0.180972	10.5065	-2.13808	0.040226	0.687262	-4.24569
P15RS	-0.120849	10.4775	-2.13803	0.0402301	0.687262	-4.24577
MIR624	0.155718	6.91267	2.13802	0.0402311	0.687262	-4.2458
CENTD2	-0.134135	7.72799	-2.13781	0.040249	0.687262	-4.24618
LOC651721	0.12513	6.87488	2.13712	0.0403098	0.687262	-4.24747
PDPN	-0.138998	6.94486	-2.13694	0.0403251	0.687262	-4.2478
LOC653436	-0.20152	7.00883	-2.13672	0.0403446	0.687262	-4.24822
TK1	-0.215956	9.65475	-2.13664	0.0403513	0.687262	-4.24836
SERF1A	-0.157679	7.37802	-2.13662	0.0403536	0.687262	-4.24841
FOXM1	-0.157113	8.29207	-2.13642	0.0403706	0.687262	-4.24877
LOC653891	0.139863	6.98017	2.13534	0.0404661	0.687402	-4.2508
HEY1	0.125835	7.01517	2.13517	0.0404805	0.687402	-4.25111
LOC643563	-0.155903	6.88029	-2.1351	0.040487	0.687402	-4.25125
TMEM199	0.191227	8.66559	2.1342	0.040566	0.687402	-4.25292
SEMA3A	-0.13111	7.21706	-2.13382	0.0405999	0.687402	-4.25364
ZNF650	-0.150094	7.79256	-2.13368	0.0406123	0.687402	-4.2539
TDG	-0.159437	11.0652	-2.13364	0.0406151	0.687402	-4.25396
LILRA2	-0.229594	9.45071	-2.13362	0.0406171	0.687402	-4.254
PTGES3	0.340158	11.1746	2.13334	0.0406419	0.687402	-4.25453
ZNF564	0.165366	7.81616	2.13321	0.040653	0.687402	-4.25476
LOC100034248	-0.186643	6.90712	-2.13287	0.0406833	0.687402	-4.2554
LOC100129196	0.141916	6.87277	2.13257	0.0407094	0.687402	-4.25595
CRSP6	-0.121877	7.02733	-2.13253	0.0407133	0.687402	-4.25603
LOC392617	0.166748	6.92647	2.13244	0.0407218	0.687402	-4.25621
C13orf34	0.147053	10.2213	2.1323	0.040734	0.687402	-4.25647
MIR1234	-0.15859	6.99325	-2.13225	0.0407377	0.687402	-4.25655
PSPH	-0.173508	8.76468	-2.13185	0.0407733	0.687402	-4.2573
LOC645381	-0.135189	7.56403	-2.13165	0.0407915	0.687402	-4.25768
VRK3	-0.235673	10.1275	-2.13145	0.0408092	0.687402	-4.25806
C14orf129	-0.177636	8.68741	-2.1312	0.0408306	0.687402	-4.25851
ADD1	-0.145638	11.1899	-2.13112	0.0408382	0.687402	-4.25867
LOC645655	0.169412	6.88477	2.13084	0.0408632	0.687455	-4.25919
LOC388795	-0.131462	6.93242	-2.12955	0.0409778	0.68823	-4.2616
C16orf42	0.139839	7.9298	2.12923	0.0410059	0.68823	-4.26219
LOC121456	-0.149541	7.05678	-2.12922	0.0410066	0.68823	-4.2622
AGK	-0.152002	8.93919	-2.12922	0.0410072	0.68823	-4.26221
MCART6	-0.141893	6.9201	-2.12876	0.0410475	0.68823	-4.26306
HMBS	-0.15671	10.0258	-2.12873	0.0410504	0.68823	-4.26312
LOC648358	-0.130453	7.06812	-2.12838	0.0410811	0.68823	-4.26376
METTL13	0.142755	10.6691	2.12835	0.0410844	0.68823	-4.26383
ARHGAP20	0.13106	6.94122	2.12768	0.0411443	0.688866	-4.26508
LOC441728	0.137125	7.06618	2.12717	0.0411894	0.689106	-4.26602
TH1L	-0.128822	10.7732	-2.1266	0.0412406	0.689106	-4.26709
GPR21	-0.120938	6.94505	-2.12621	0.0412753	0.689106	-4.26781
SLA2	0.168032	7.10776	2.12598	0.0412961	0.689106	-4.26824
ADIPOR1	-0.207322	8.71544	-2.1259	0.0413029	0.689106	-4.26838
PEX16	0.129158	9.78794	2.12583	0.0413092	0.689106	-4.26852
LOC647337	0.121901	6.8746	2.1258	0.0413122	0.689106	-4.26858
FAR1	-0.205655	9.1593	-2.12519	0.0413668	0.689134	-4.26971
LYSMD4	0.152604	8.1574	2.12512	0.0413731	0.689134	-4.26984
LOC652324	0.180103	7.73851	2.12501	0.0413823	0.689134	-4.27003
TIMD4	-0.138913	6.78105	-2.12459	0.0414205	0.689134	-4.27083
KCNA10	-0.148718	6.96836	-2.12425	0.0414507	0.689134	-4.27145
FAM75A1	-0.132102	7.01882	-2.12311	0.041553	0.689134	-4.27357
ZNF322B	0.173618	8.05026	2.12226	0.0416298	0.689134	-4.27515
LOC728290	-0.141033	6.86604	-2.12184	0.0416681	0.689134	-4.27594
CD44	-0.157181	10.8114	-2.12169	0.0416814	0.689134	-4.27622
POLR2K	0.205292	8.09405	2.12107	0.0417368	0.689134	-4.27735
LOC100133163	-0.13975	7.6757	-2.12068	0.0417722	0.689134	-4.27808
SNHG8	0.224103	11.6304	2.12066	0.0417739	0.689134	-4.27812
ICAM1	-0.187383	7.04545	-2.12055	0.0417843	0.689134	-4.27833
CENTB2	0.16116	8.17344	2.12038	0.0417993	0.689134	-4.27864
ZFAND5	0.131175	11.3158	2.1201	0.0418252	0.689134	-4.27917
LOC649770	0.160236	6.90026	2.11965	0.041866	0.689134	-4.28001
LRP5	-0.170295	8.4225	-2.11918	0.0419083	0.689134	-4.28087
LOC732146	-0.163169	7.1371	-2.11909	0.0419161	0.689134	-4.28103
LAPTM4B	-0.137778	12.4153	-2.11886	0.0419375	0.689134	-4.28147
LOC729675	-0.124344	6.94776	-2.11871	0.0419507	0.689134	-4.28174
LOC652663	-0.150247	6.92932	-2.11868	0.0419535	0.689134	-4.2818
LOC645686	0.13078	6.97787	2.11841	0.0419778	0.689134	-4.28229
RRP7A	0.160664	11.0035	2.11816	0.0420009	0.689134	-4.28277
ATG2A	-0.150682	7.85214	-2.11781	0.0420329	0.689134	-4.28342
LOC100133639	-0.15126	7.07547	-2.11776	0.0420374	0.689134	-4.28351
MYOM1	-0.12753	7.006	-2.11753	0.0420581	0.689134	-4.28393
LOC642280	0.121197	6.93262	2.11742	0.042068	0.689134	-4.28414
LOC652258	0.157455	6.98213	2.11741	0.0420691	0.689134	-4.28416
VPS37A	0.17726	10.1953	2.1173	0.0420793	0.689134	-4.28437
LOC100131166	-0.182832	8.22732	-2.11716	0.0420917	0.689134	-4.28462
TRIAP1	0.152351	10.9028	2.11715	0.0420928	0.689134	-4.28464
MYT1	0.162996	6.89701	2.11663	0.0421399	0.689134	-4.2856
MSRA	-0.129031	9.87531	-2.11642	0.0421587	0.689134	-4.28598
LOC100130701	0.198248	7.56246	2.1164	0.0421608	0.689134	-4.28603
LMOD2	0.115987	6.95188	2.1164	0.0421609	0.689134	-4.28603
CAT	-0.177613	11.932	-2.11637	0.0421633	0.689134	-4.28608
LOC100134209	-0.128006	7.93575	-2.11625	0.0421745	0.689134	-4.28631
OR13G1	-0.137291	6.84328	-2.11616	0.0421824	0.689134	-4.28647
LOC642838	-0.121365	7.18242	-2.11614	0.042185	0.689134	-4.28652
GM2A	0.149954	7.49388	2.11607	0.042191	0.689134	-4.28664
LOC729078	-0.126556	6.82197	-2.11557	0.0422371	0.689528	-4.28758
LOC643801	0.165944	6.9429	2.1151	0.0422796	0.689865	-4.28844
A3GALT2	0.119281	6.95132	2.1146	0.0423254	0.689902	-4.28937
ZNF275	-0.174368	8.09871	-2.11425	0.0423578	0.689902	-4.29002
LOC647955	0.143017	6.99366	2.1139	0.0423896	0.689902	-4.29067
ETV3	-0.139567	7.11441	-2.11388	0.0423913	0.689902	-4.2907
OR4F5	-0.125297	6.92937	-2.11368	0.0424099	0.689902	-4.29108
LOC100129222	-0.128927	6.87549	-2.11315	0.0424579	0.689902	-4.29205
OR5T2	0.167255	6.94898	2.11301	0.0424713	0.689902	-4.29232
KRT31	0.142501	7.029	2.11295	0.0424768	0.689902	-4.29243
FIG4	-0.162291	8.75164	-2.11292	0.0424795	0.689902	-4.29248
GTF2H2B	0.184299	9.58795	2.1123	0.0425357	0.690356	-4.29362
LOC642778	-0.159583	6.89188	-2.11199	0.0425648	0.690356	-4.29421
LOC100131349	0.204331	7.11639	2.11189	0.0425733	0.690356	-4.29438
LOC283514	-0.147603	7.04807	-2.11088	0.0426665	0.691509	-4.29625
TMEM14C	-0.118916	12.3979	-2.1101	0.0427382	0.691514	-4.29769
CENPP	0.154146	8.08245	2.11004	0.0427437	0.691514	-4.2978
NUDT16L1	0.144374	10.1022	2.10987	0.0427594	0.691514	-4.29812
LOC100132717	-0.15066	10.8135	-2.10981	0.0427653	0.691514	-4.29823
MAP3K7IP1	0.212208	8.97796	2.10969	0.0427768	0.691514	-4.29846
LOC644512	-0.132397	6.84841	-2.10888	0.0428517	0.692048	-4.29996
LCE3C	0.145106	6.89388	2.10885	0.0428538	0.692048	-4.30001
LOC441016	-0.15754	7.05825	-2.10751	0.0429784	0.693115	-4.30249
SIM2	-0.17704	7.06867	-2.10738	0.0429901	0.693115	-4.30273
GPLD1	0.13066	6.88924	2.10738	0.0429902	0.693115	-4.30273
ECH1	-0.129352	11.944	-2.10719	0.0430081	0.693115	-4.30309
WDR75	0.142179	10.847	2.10684	0.0430403	0.693278	-4.30373
ORC5L	0.117557	10.5853	2.10637	0.0430836	0.69362	-4.30459
LOC646818	0.141188	6.89819	2.10588	0.043129	0.693995	-4.30549
DEFB1	-0.139404	6.93398	-2.10517	0.0431954	0.694431	-4.30681
LOC652322	0.17842	7.1068	2.10512	0.0432003	0.694431	-4.30691
PPA1	-0.122761	12.9575	-2.10486	0.0432242	0.69446	-4.30738
GOLGA9P	-0.20804	7.46388	-2.10438	0.0432687	0.694808	-4.30826
LOC100131665	-0.160566	6.96084	-2.10402	0.043303	0.694808	-4.30894
LOC100131767	0.133463	7.02877	2.10392	0.0433122	0.694808	-4.30912
SPO11	-0.141778	7.14212	-2.10336	0.0433646	0.694952	-4.31016
LOC650832	-0.146594	8.61193	-2.10313	0.0433859	0.694952	-4.31058
DDX43	0.163443	6.95383	2.10288	0.0434089	0.694952	-4.31103
MAGEB6B	-0.142914	6.98354	-2.10288	0.0434096	0.694952	-4.31105
PPAN-P2RY11	0.171794	7.30334	2.10238	0.0434562	0.69502	-4.31196
ELFN1	0.154201	6.87999	2.10201	0.0434909	0.69502	-4.31265
FAT3	0.148072	7.05091	2.102	0.0434914	0.69502	-4.31266
CNNM3	0.124151	8.67445	2.10189	0.0435023	0.69502	-4.31287
MIR374B	0.148466	6.78265	2.1016	0.0435287	0.695087	-4.31339
TOP1P2	0.241846	7.9626	2.101	0.0435852	0.695565	-4.3145
LOC100129237	0.398048	9.32927	2.10081	0.0436028	0.695565	-4.31485
C14orf45	-0.135924	7.01742	-2.10045	0.0436375	0.695599	-4.31553
PRPH	0.133657	6.75129	2.10018	0.0436627	0.695599	-4.31602
GSTO1	-0.144042	12.7708	-2.10005	0.0436748	0.695599	-4.31626
CXorf26	0.136152	10.5005	2.09951	0.0437252	0.695599	-4.31725
LOC100132769	0.142131	6.97342	2.09943	0.0437325	0.695599	-4.31739
RRS1	0.15429	10.9281	2.09938	0.0437378	0.695599	-4.31749
RBM34	0.226301	9.95928	2.09772	0.0438947	0.697165	-4.32056
ANKRD26	0.165714	7.24262	2.09742	0.0439225	0.697165	-4.3211
LOC645458	0.117816	6.83711	2.09738	0.0439265	0.697165	-4.32118
KIAA1377	0.141559	6.92101	2.09697	0.043965	0.697165	-4.32193
LOC100133181	-0.158777	7.07	-2.0969	0.0439713	0.697165	-4.32205
PCMT1	-0.120258	11.8283	-2.09668	0.0439921	0.697165	-4.32246
TINP1	-0.149907	12.2329	-2.09643	0.0440164	0.697165	-4.32293
LOC653272	0.135475	6.94666	2.09635	0.044024	0.697165	-4.32308
PHYHIPL	-0.132265	6.79167	-2.09615	0.0440428	0.697165	-4.32344
CYP2C18	0.124454	6.92465	2.09599	0.0440581	0.697165	-4.32374
LOC646249	-0.149541	6.83531	-2.09514	0.0441383	0.697446	-4.3253
C2orf48	0.13431	6.98287	2.09507	0.0441456	0.697446	-4.32544
HDAC8	-0.198208	7.60797	-2.09504	0.044148	0.697446	-4.32549
LOC100128813	0.138053	6.88931	2.09486	0.0441646	0.697446	-4.32581
LOC643089	-0.160737	7.00546	-2.09427	0.0442215	0.697993	-4.32691
ARHGAP6	0.145983	7.10834	2.09372	0.0442733	0.698461	-4.32791
MAPK12	-0.171915	7.75637	-2.09304	0.0443382	0.699133	-4.32916
LOC729446	-0.142012	8.20031	-2.09232	0.0444069	0.699628	-4.33049
SMN2	-0.162935	7.66456	-2.09224	0.0444141	0.699628	-4.33063
FOXN1	0.145234	6.96795	2.0915	0.044485	0.699646	-4.33199
LOC652353	0.13331	6.96808	2.09121	0.0445124	0.699646	-4.33252
LOC653547	-0.148656	6.89844	-2.09098	0.044535	0.699646	-4.33295
PRDX4	-0.164179	12.1325	-2.09034	0.0445959	0.699646	-4.33412
[truncated: 29,427 more rows]
